# Supplementary material
Source: publisher figshare collection journal article supplement (https://gsajournals.figshare.com/ndownloader/files/17774759)
Supplement: Supplementary file 1 [file 17774759]

## Sheet: A.nigricans_RNA_seq
Table S4. RNA-seq analysis of Ascodesmis nigricans.
Conditions analyzed were total sexual mycelium (sex), total vegetative mycelium (veg), and young fruiting bodies (protoapothecia, protoapo).
Columns B-G give results of an analysis with DESeq2 (log2 fold change and adjusted p-value [padj] for each comparison.
Columns H-J give mean RPKM values for the three analyzed conditions.
Columns K-P give information about the annotation from KOG, WolfPsort, and Pfam domain analyses.
locus_tag	log2 FoldChange sex/veg	padj sex/veg	log2 FoldChange protoapo/veg	padj protoapo/veg	log2 FoldChange protoapo/sex	padj protoapo/sex	mean RPKM sex	mean RPKM veg	mean RPKM protoapo	kogid	kogdefline	kogClass	kogGroup	WolfPsort predictions	Pfam domains (sorted by e-value)
proteinId100153	4.24946	0.00959501	9.57364	9.96782e-11	5.32418	3.77515e-24	1.15792	0	25.213					cyto 11, cyto_nucl 9.333, cyto_pero 8.333, nucl 6.5, pero 4.5, mito 4	HNH_2
proteinId100353	0.031428	0.943919	2.98492	5.04172e-21	2.9535	1.47205e-20	135.032	68.1155	555.662	KOG3808	Uncharacterized conserved protein	Function unknown	POORLY CHARACTERIZED	mito 13.5, cyto_mito 10.166, cyto_nucl 6.333, cyto 5.5, nucl 5
proteinId10070	0.777938	0.737199	2.57055	0.162015	1.79261	0.33131	0.389405	0.0962307	0.89769					mito 21, nucl 5.5, cyto_nucl 3.5
proteinId100702	0.531304	0.343761	2.76032	2.88606e-09	2.22901	1.61861e-06	40.6748	14.5939	103.092	KOG4412	26S proteasome regulatory complex, subunit PSMD10	Posttranslational modification, protein turnover, chaperones	CELLULAR PROCESSES AND SIGNALING	cysk 19, cyto 5, mito 2	Ank_4,Ank_2,Ank,Ank_5,Ank_3
proteinId100721	-0.989165	0.0430571	-3.16116	9.78142e-13	-2.172	1.48204e-06	69.7708	72.0424	8.07781	KOG4159	Predicted E3 ubiquitin ligase	Posttranslational modification, protein turnover, chaperones	CELLULAR PROCESSES AND SIGNALING	nucl 14.5, cyto_nucl 12.5, cyto 9.5	SPX,zf-C3HC4_4,zf-RING_2,zf-C3HC4_2,zf-C3HC4_3
proteinId10081	2.31894	0.0200902	8.11313	8.18626e-21	5.79419	5.81312e-27	1.43005	0.128527	43.9106	KOG1819	FYVE finger-containing proteins	General function prediction only	POORLY CHARACTERIZED	nucl 18, cyto_nucl 11.5, mito 6
proteinId100937	-0.709327	0.223434	-5.73686	5.79471e-11	-5.02753	1.36065e-08	6.55353	5.5636	0.0847481					nucl 22, cyto_nucl 13.5, cyto 3	Rox3
proteinId100951	-0.405461	0.781465	-2.13656	0.0971506	-1.7311	0.190925	2.83746	1.93361	0.383571					mito 18, cyto 4, extr 3
proteinId100976	-1.85236	2.10327e-07	-7.12509	6.27555e-49	-5.27272	5.59112e-27	31.2071	58.5807	0.401963	KOG2841	Structure-specific endonuclease ERCC1-XPF, ERCC1 component	Replication, recombination and repair	INFORMATION STORAGE AND PROCESSING	nucl 19, cyto_nucl 14.5, cyto 8	Rad10
proteinId100979	-0.571502	0.115909	0.528247	0.112293	1.09975	0.000682956	6.54525	5.00612	7.38351	KOG3818	DNA polymerase epsilon, subunit B	Replication, recombination and repair	INFORMATION STORAGE AND PROCESSING	mito 20, nucl 4.5, cyto_nucl 4	DNA_pol_E_B
proteinId100982	1.21481	0.019769	3.14128	1.47182e-11	1.92647	7.98842e-06	11.035	2.4069	22.3036					mito 10, cyto 7.5, nucl 7, cyto_pero 5	DASH_Dad1
proteinId101192	-0.310551	0.578821	4.77472	3.2073e-32	5.08527	7.19157e-40	5.70922	3.64423	104.247					mito 23, extr 2
proteinId101258	-0.501392	0.188599	-0.412012	0.24268	0.0893808	0.82105	12.841	9.31895	7.14298	KOG4162	Predicted calmodulin-binding protein	Signal transduction mechanisms	CELLULAR PROCESSES AND SIGNALING	mito 10.5, cyto_mito 10, cyto 8.5, nucl 5	TPR_19,TPR_16,TPR_11,TPR_12
proteinId101413	0.676949	0.112129	3.61459	1.07698e-22	2.93764	1.70974e-15	67.8795	21.5274	273.206	KOG3106	ER lumen protein retaining receptor	Intracellular trafficking, secretion, and vesicular transport	CELLULAR PROCESSES AND SIGNALING	mito 10, plas 9, E.R. 5, mito_nucl 5	ER_lumen_recept
proteinId101524	-0.396587	0.211759	0.852909	0.00202884	1.2495	5.41467e-06	30.8802	20.7922	38.469	KOG4405	GDP dissociation inhibitor	Intracellular trafficking, secretion, and vesicular transport	CELLULAR PROCESSES AND SIGNALING	extr 11, cyto 6.5, cyto_nucl 4, mito 3, plas 2, pero 2, E.R. 2	GDI
proteinId101614	0.104511	0.874355	-2.50665	1.16688e-06	-2.61117	4.36456e-07	67.0401	32.2525	5.61549	KOG3493	Ubiquitin-like protein	Posttranslational modification, protein turnover, chaperones	CELLULAR PROCESSES AND SIGNALING	cyto 20.5, cyto_nucl 13, nucl 4.5	ubiquitin
proteinId101706	3.19078	0.00237084	5.45217	1.63936e-08	2.26139	0.000900203	2.8617	0.132984	7.51157					extr 8, mito 7, nucl 5.5, cyto_nucl 4.5, plas 3, cyto 2.5
proteinId101927	3.98264	8.21977e-11	6.60824	2.01884e-29	2.6256	5.4661e-12	7.60919	0.22643	24.7866					extr 10, plas 6, mito 4, cyto 3, E.R. 3
proteinId101940	0.716988	0.0274322	0.691214	0.0235199	-0.0257745	0.943105	33.4427	10.3775	17.1421					mito 15, cyto_nucl 5, nucl 4.5, cyto 4.5	UPF0052
proteinId102148	0.586477	0.349106	-5.05704	1.46632e-08	-5.64352	2.48298e-10	17.485	5.97186	0.142733	KOG0570	Transcriptional coactivator	Transcription	INFORMATION STORAGE AND PROCESSING	nucl 9.5, cyto_nucl 7.5, cyto 4.5, mito 4, pero 4, plas 2, E.R. 2	Med7
proteinId102176	-0.0824104	0.828364	1.63214	5.41198e-09	1.71455	6.88322e-10	31.871	17.3119	54.9832	KOG2604	Subunit of cis-Golgi transport vesicle tethering complex - Sec34p	Intracellular trafficking, secretion, and vesicular transport	CELLULAR PROCESSES AND SIGNALING	nucl 19.5, cyto_nucl 13.5, cyto 6.5	Sec34
proteinId10231	-0.575723	0.173696	-0.260401	0.519499	0.315322	0.442643	65.4975	50.5662	42.9207	KOG0935	Clathrin adaptor complex, small subunit	Intracellular trafficking, secretion, and vesicular transport	CELLULAR PROCESSES AND SIGNALING	mito 14.5, cyto_mito 9.333, nucl 8.5, cyto_nucl 6.333	Clat_adaptor_s
proteinId10282	0.9574	0.4394	1.82739	0.0833398	0.869992	0.420287	2.56899	0.643308	2.48065					cyto 10.5, mito 7, cyto_nucl 7, pero 3, nucl 2.5, plas 2, extr 2
proteinId103452	0.651506	0.0984791	0.402092	0.281163	-0.249414	0.523628	61.2966	20.0609	27.0283	KOG2608	Endoplasmic reticulum membrane-associated oxidoreductin involved in disulfide bond formation	Posttranslational modification, protein turnover, chaperones	CELLULAR PROCESSES AND SIGNALING	nucl 11.5, cyto_nucl 9.5, cyto 6.5, cysk 4, pero 3	ERO1
proteinId103581	0.635878	0.173114	1.76491	1.36962e-05	1.12904	0.00602914	15.1846	4.94684	17.2905					nucl 18.5, cyto_nucl 14.833, cyto 6, cyto_mito 4.165
proteinId103593	0.347905	0.457329	-0.817002	0.0417422	-1.16491	0.00339725	30.2305	12.0724	6.99427	KOG4852	Uncharacterized conserved protein	Function unknown	POORLY CHARACTERIZED	nucl 16.5, cyto_nucl 10, mito 8	DUF1762
proteinId103940	-0.554735	0.143312	-2.13992	1.86866e-10	-1.58518	3.38347e-06	96.0241	72.5474	16.7281	KOG0548	Molecular co-chaperone STI1	Posttranslational modification, protein turnover, chaperones	CELLULAR PROCESSES AND SIGNALING	pero 9, nucl 8, mito 5, cyto 4	TPR_11,TPR_2,TPR_1,TPR_12,TPR_14,TPR_8
proteinId104019	1.07923	0.0379662	0.817977	0.0966172	-0.261254	0.623722	21.9379	5.28834	9.52541	KOG1187	Serine/threonine protein kinase	Signal transduction mechanisms	CELLULAR PROCESSES AND SIGNALING	mito 19, nucl 5, cyto 2
proteinId104339	-0.0431852	0.933115	1.64724	5.81438e-06	1.69042	2.16153e-06	12.0898	6.35746	20.5027					cysk 19, cyto 6, cyto_nucl 5
proteinId104894	1.38483	0.0085601	3.49397	3.12886e-13	2.10913	1.2931e-05	33.3422	6.39491	75.4294	KOG1721	FOG: Zn-finger	General function prediction only	POORLY CHARACTERIZED	nucl 26.5, cyto_nucl 14	zf-H2C2_2,zf-C2H2,zf-C2H2_4
proteinId105673	2.51228	0.000118521	5.63393	4.66467e-21	3.12165	2.06661e-14	7.54071	0.637871	34.9286					nucl 14, mito 12, cyto_nucl 8.5
proteinId10576	1.11881	0.254425	-1.14419	0.256586	-2.263	0.0165047	3.40275	0.784787	0.343989					mito 14, cyto 5.5, nucl 5, cyto_pero 3.5
proteinId105763	-0.140483	0.755498	0.360093	0.323698	0.500576	0.169812	76.7797	43.5564	57.003	KOG3490	Transcription elongation factor SPT4	Transcription	INFORMATION STORAGE AND PROCESSING	mito 18, nucl 4, cyto 4, cyto_nucl 4	Spt4
proteinId105766	0.0641877	0.930941	0.702869	0.211051	0.638682	0.267825	21.6096	10.5886	17.5869	KOG4019	Calcineurin-mediated signaling pathway inhibitor DSCR1	General function prediction only	POORLY CHARACTERIZED	mito 13, nucl 9, cyto_nucl 8, cyto 5	Calcipressin
proteinId10596	0.027746	0.958395	0.216198	0.607491	0.188452	0.662693	10.8057	5.41841	6.4524	KOG1875	Thyroid hormone receptor-associated coactivator complex component (TRAP170)	Transcription	INFORMATION STORAGE AND PROCESSING	nucl 10.5, cyto_nucl 10.333, cyto 9, cyto_pero 6.333, cysk 3, pero 2.5	Med14
proteinId106237	1.64406	0.00025713	-1.94321	2.21951e-05	-3.58727	1.10753e-15	23.4812	3.76292	0.984311	KOG0595	Serine/threonine-protein kinase involved in autophagy	Posttranslational modification, protein turnover, chaperones	CELLULAR PROCESSES AND SIGNALING	cyto_nucl 8.5, nucl 8, mito 8, cyto 7, extr 2, pero 2	DUF3543,Pkinase,Pkinase_Tyr
proteinId106518	-1.12338	0.0355369	-1.54037	0.00201345	-0.416987	0.448842	16.8668	19.1061	6.57926					mito 20, nucl 5.5, cyto_nucl 4
proteinId106586	0.339239	0.484719	2.14907	3.41284e-08	1.80983	2.47538e-06	30.3232	12.3565	56.5406	KOG3808	Uncharacterized conserved protein	Function unknown	POORLY CHARACTERIZED	plas 14, E.R. 5, mito 4, extr 2, cyto_mito 2, mito_nucl 2	DUF1242
proteinId106591	0.597878	0.341382	1.14927	0.0341341	0.551393	0.335982	22.0376	7.53199	17.2711					cysk 13, cyto 8, cyto_nucl 7.5, nucl 3
proteinId106701	2.18969	0.206214	2.50806	0.109501	0.318371	0.840337	1.00091	0.0846818	0.681539					nucl 7, cyto 6, plas 3, E.R. 3, golg 3, extr 2, mito 1, pero 1, vacu 1
proteinId10677	0.588543	0.0765138	2.86626	5.78777e-23	2.27772	4.05348e-15	34.1152	11.5343	86.6485	KOG2622	Putative myrosinase precursor	Defense mechanisms	CELLULAR PROCESSES AND SIGNALING	nucl 15.5, cyto_nucl 9.5, mito 8	DUF1712
proteinId106875	-0.291301	0.572326	-4.79901	1.48724e-16	-4.50771	1.15364e-14	9.29453	5.83145	0.198762	KOG0123	Polyadenylate-binding protein (RRM superfamily)	RNA processing and modification	INFORMATION STORAGE AND PROCESSING	nucl 16.5, cyto_nucl 10.5, mito 6, cyto 3.5
proteinId107091	-0.00243911	0.996858	-0.390266	0.323692	-0.387827	0.335801	10.9488	5.58856	4.34726	KOG0613	Projectin/twitchin and related proteins	Cytoskeleton	CELLULAR PROCESSES AND SIGNALING	nucl 13, cyto_mito 6, mito 5.5, cyto 5.5	MUG113,T5orf172
proteinId107314	-0.375403	0.653242	-2.10701	0.00222116	-1.73161	0.013903	20.9529	14.004	3.16373					extr 9, plas 8, mito 5, E.R. 2, pero 1, golg 1, vacu 1
proteinId107363	-0.530732	0.757623	4.49621	0.000184151	5.02694	1.79805e-05	0.229644	0.176475	5.15904					mito 14, nucl 5, extr 5, cyto 2
proteinId107438	-0.247906	0.700875	-3.59656	2.59445e-12	-3.34866	1.03364e-10	51.3882	30.7347	2.5025	KOG1187	Serine/threonine protein kinase	Signal transduction mechanisms	CELLULAR PROCESSES AND SIGNALING	mito 13, nucl 7, extr 3, pero 2
proteinId107441	-1.45716	0.0121174	-1.3688	0.0119552	0.0883674	0.890664	29.7517	41.6802	16.1849	KOG1721	FOG: Zn-finger	General function prediction only	POORLY CHARACTERIZED	nucl 13, mito 4, cyto 3, plas 3, pero 2, golg 2	Fungal_trans
proteinId107615	-1.88993	2.72907e-05	-4.0501	1.81154e-20	-2.16017	1.3714e-06	49.8854	95.3503	5.67698					plas 18, mito 5, cyto 2, E.R. 2
proteinId107675	-1.05827	0.0147613	-3.93798	2.20655e-18	-2.87971	2.95075e-10	15.7789	16.8416	1.09456	KOG1607	Protein transporter of the TRAM (translocating chain-associating membrane) superfamily	Intracellular trafficking, secretion, and vesicular transport	CELLULAR PROCESSES AND SIGNALING	plas 14, mito 7, E.R. 3, cyto 2	TRAM_LAG1_CLN8,TRAM1
proteinId107804	0.758628	0.777144	6.21111	0.00120821	5.45248	0.000591763	0.144494	0	5.61512					mito 14, pero 4, plas 3, golg 3, nucl 2
proteinId107839	3.27106	2.34112e-12	0.587966	0.257134	-2.6831	1.26122e-09	22.6625	1.18038	1.81779					extr 20, mito 3, cyto 2, vacu 2
proteinId107855	3.97339	1.22538e-12	7.01224	5.41301e-39	3.03886	1.5718e-16	23.8298	0.725224	104.125					plas 16, mito 4, E.R. 3, vacu 2, cyto_mito 2
proteinId107892	-2.51885	3.51847e-09	-3.08067	6.50698e-13	-0.561821	0.238743	6.18464	18.3882	2.18933	KOG0254	Predicted transporter (major facilitator superfamily)	General function prediction only	POORLY CHARACTERIZED	plas 22, E.R. 3	Sugar_tr,MFS_1,MFS_2
proteinId108052	-1.59892	3.65565e-05	-4.32122	5.07845e-27	-2.7223	2.81406e-11	17.6518	27.7617	1.37862	KOG1399	Flavin-containing monooxygenase	Secondary metabolites biosynthesis, transport and catabolism	METABOLISM	cyto 12.5, cyto_nucl 11, nucl 8.5, mito 2, pero 2	Pyr_redox_3,FMO-like,NAD_binding_8,K_oxygenase
proteinId10807	-0.491996	0.284997	0.0644599	0.895074	0.556456	0.184782	20.6559	14.9163	15.8724	KOG3165	Predicted nucleic-acid-binding protein, contains PIN domain	General function prediction only	POORLY CHARACTERIZED	mito 13, nucl 8, cyto 6	Fcf1
proteinId108156	1.13611	0.518093	2.85721	0.0472872	1.7211	0.190196	0.387591	0.0770208	0.72786					mito 10, plas 6, nucl 5, cyto_mito 5
proteinId108261	-3.11518	1.88517e-17	-10.9608	1.18626e-36	-7.84566	3.86527e-19	125.709	569.191	0.193566					nucl 14.5, mito 11, cyto_nucl 9.5
proteinId108446	-1.38754	0.000290482	-4.42722	3.15097e-31	-3.03968	3.56559e-15	53.3527	71.74	3.30494	KOG3071	Fatty acyl-CoA elongase/Polyunsaturated fatty acid specific elongation enzyme	Lipid transport and metabolism	METABOLISM	plas 22, mito 2, E.R. 2	ELO
proteinId108458	-0.220695	0.875196	-3.363	0.0104047	-3.1423	0.0182749	2.84025	1.75186	0.130515					cyto 8, mito 6, cyto_pero 6, nucl 5
proteinId108482	-2.74561	7.13668e-14	-2.98329	7.86915e-17	-0.23768	0.562152	882	3095.19	395.512	KOG4077	Cytochrome c oxidase, subunit Va/COX6	Energy production and conversion	METABOLISM	nucl 15, cyto_nucl 12, cyto 5, mito 4	COX5A
proteinId108509	-0.479226	0.397053	-2.90666	1.12418e-09	-2.42743	5.07344e-07	33.8245	23.8257	3.16726	KOG4198	RNA-binding Ran Zn-finger protein and related proteins	General function prediction only	POORLY CHARACTERIZED	mito 15, cyto 5.5, cyto_nucl 4.5, extr 4	zf-RanBP,RRM_1,RNase_T,RRM_6
proteinId10853	0.29762	0.413015	1.57794	1.22566e-07	1.28032	1.94132e-05	40.8384	16.9667	51.8698	KOG1374	Gamma tubulin	Cytoskeleton	CELLULAR PROCESSES AND SIGNALING	cyto 15, cyto_nucl 13, nucl 9	Tubulin,Tubulin_C,Misat_Tub_SegII
proteinId108559	2.10592	5.87866e-05	2.32216	3.66389e-06	0.216236	0.693012	11.5236	1.33335	6.92654					mito 12, nucl 11.5, cyto_nucl 7.5, cyto 2.5
proteinId108836	0.369106	0.310725	1.89205	5.12448e-10	1.52295	7.23146e-07	77.5923	30.6667	116.931	KOG0787	Dehydrogenase kinase	Signal transduction mechanisms	CELLULAR PROCESSES AND SIGNALING	mito 23, cyto 2.5, cyto_nucl 2.5	BCDHK_Adom3,HATPase_c
proteinId108972	1.22196	0.196905	0.144768	0.888966	-1.07719	0.222544	4.4752	0.945001	1.05886	KOG2992	Nucleolar GTPase/ATPase p130	Nuclear structure	CELLULAR PROCESSES AND SIGNALING	nucl 19.5, cyto_nucl 11.833, mito 4.5, cyto_mito 4.333
proteinId109017	6.31343	6.62299e-18	8.04596	2.31407e-29	1.73253	0.00887015	36.3574	0.196853	62.9129					nucl 18, cyto_nucl 12.5, cyto 5, mito 3
proteinId109019	0.713213	0.645952	5.91287	1.15444e-07	5.19966	3.1205e-09	0.62518	0.164361	13.7197					nucl 15, cyto_nucl 10.5, cyto 4, mito 3, cysk 3
proteinId109023	0.820131	0.189444	-0.178626	0.777977	-0.998757	0.0823867	4.08388	1.17483	1.04959	KOG1246	DNA-binding protein jumonji/RBP2/SMCY, contains JmjC domain	General function prediction only	POORLY CHARACTERIZED	mito 16, mito_nucl 11.833, cyto_mito 9.833, nucl 6.5	PLU-1,JmjC,ARID,PHD,JmjN,zf-C5HC2
proteinId109088	-0.624171	0.157005	-1.48142	0.000134953	-0.857254	0.0338983	138.79	109.523	39.5429	KOG2655	Septin family protein (P-loop GTPase)	Intracellular trafficking, secretion, and vesicular transport	CELLULAR PROCESSES AND SIGNALING	nucl 11.5, cyto 11, mito_nucl 7.5, mito 2.5	Septin,MMR_HSR1,GTP_EFTU,DUF258
proteinId109173	-1.38638	0.138249	-1.03256	0.244075	0.353813	0.717152	1.37447	1.9242	0.93979					nucl 10, cyto 7.5, mito 6, cyto_pero 5, cysk 2	Methyltransf_23
proteinId109342	0.079514	0.969158	2.54295	0.0735763	2.46343	0.080334	0.922271	0.442307	3.25004					mito 12, extr 10, cyto 3
proteinId109438	0.826328	0.0177407	-2.34743	6.33008e-12	-3.17375	6.32264e-21	36.3867	10.4313	2.06843	KOG2085	Serine/threonine protein phosphatase 2A, regulatory subunit	Signal transduction mechanisms	CELLULAR PROCESSES AND SIGNALING	nucl 15.5, cyto_nucl 10.5, mito 9	B56
proteinId109467	-0.130149	0.767153	-1.15316	0.000760031	-1.02301	0.00320267	4.43507	2.47185	1.12992	KOG0889	Histone acetyltransferase SAGA, TRRAP/TRA1 component, PI-3 kinase superfamily	Signal transduction mechanisms	CELLULAR PROCESSES AND SIGNALING	plas 18, nucl 3, E.R. 3, vacu 2	FAT,PI3_PI4_kinase,FATC
proteinId109658	1.41696	4.05845e-06	1.68085	1.28695e-08	0.263889	0.407419	68.9137	13.2008	43.4414					cyto 9.5, cyto_nucl 9.5, nucl 8.5, mito 7	AIG2
proteinId109881	0.912911	0.0383669	1.6725	2.90826e-05	0.759589	0.0637391	15.0355	4.03623	13.2932	KOG3957	Predicted L-carnitine dehydratase/alpha-methylacyl-CoA racemase	Lipid transport and metabolism	METABOLISM	mito 12, cyto 12, cyto_mito 12	CoA_transf_3
proteinId110362	-0.790194	0.00344649	0.655039	0.0102151	1.44523	8.23779e-09	115.428	102.43	164.977					plas 8, golg 6, mito 5, E.R. 5, nucl 1, cyto 1, extr 1, cyto_nucl 1
proteinId110488	-2.84953	1.4261e-07	-0.97106	0.0675372	1.87847	0.000518708	4.58695	17.2127	8.88702	KOG2573	Ribosome biogenesis protein - Nop56p/Sik1p	RNA processing and modification	INFORMATION STORAGE AND PROCESSING	mito 15, nucl 11	SMAP
proteinId11061	0.6915	0.0266948	1.43832	3.75407e-07	0.746824	0.00902321	14.406	4.55904	12.6725	KOG2006	WD40 repeat protein	General function prediction only	POORLY CHARACTERIZED	mito 10, nucl 6, cyto 6, cyto_nucl 6	RIC1
proteinId110673	-0.850147	0.0552078	-0.0437866	0.935147	0.80636	0.0541813	9.05656	8.34752	8.24791	KOG0381	HMG box-containing protein	General function prediction only	POORLY CHARACTERIZED	nucl 24, cyto_nucl 14.5	HMG_box,HMG_box_2,SAM_1
proteinId110745	-0.0425208	0.904702	0.467887	0.0838784	0.510407	0.0629352	140.123	73.8002	104.405	KOG2719	Metalloprotease	General function prediction only	POORLY CHARACTERIZED	cyto 10.5, cyto_nucl 6.5, mito 5, extr 4, plas 2, golg 2, nucl 1.5	Peptidase_M48
proteinId110925	4.24287	0.0260324	5.67752	0.00114308	1.43465	0.199367	2.13167	0	3.17888					nucl 21.5, cyto_nucl 12, mito 4
proteinId110932	2.14608	0.183629	0.452892	0.786787	-1.69319	0.257033	1.78368	0.174994	0.26131	KOG1721	FOG: Zn-finger	General function prediction only	POORLY CHARACTERIZED	nucl 26, cyto_nucl 14.5
proteinId110938	NA	NA	NA	NA	NA	NA	0	0	0					nucl 11.5, cyto_nucl 9, mito 7, cyto 5.5
proteinId110942	1.66331	0.0889285	6.25208	2.39904e-14	4.58877	3.70884e-16	1.837	0.267745	24.2575					cyto_nucl 9.833, nucl 9.5, cyto 7, cyto_mito 6.999, mito 5.5, extr 4
proteinId11110	0.125662	0.733592	0.988322	0.000498909	0.862661	0.00263002	41.826	19.5496	39.7425	KOG0590	Checkpoint kinase and related serine/threonine protein kinases	Cell cycle control, cell division, chromosome partitioning	METABOLISM	cyto 11, cyto_nucl 10.5, nucl 8, extr 2, pero 2, cysk 2	Pkinase,Pkinase_Tyr,Kinase-like
proteinId111383	0.926448	0.182922	0.669069	0.304776	-0.257379	0.707306	8.34471	2.21367	3.6012	KOG1216	von Willebrand factor and related coagulation proteins	Extracellular structures	CELLULAR PROCESSES AND SIGNALING	nucl 21, cyto_nucl 15.5, cyto 6	Rad60-SLD
proteinId111423	0.729395	0.0628021	2.17289	3.56189e-10	1.4435	2.38331e-05	17.1138	5.28595	24.5151					nucl 11, plas 6, mito 5, cyto 3	Zn_clus,Fungal_trans_2
proteinId111426	0.211465	0.759845	2.92067	5.63992e-09	2.7092	1.05089e-08	2.33267	1.02573	8.12165	KOG1216	von Willebrand factor and related coagulation proteins	Extracellular structures	CELLULAR PROCESSES AND SIGNALING	extr 16, mito 3, E.R. 3, golg 3
proteinId111445	-1.15116	0.268025	0.565884	0.549784	1.71705	0.0608832	1.15778	1.36838	2.11121					plas 16, mito 6, extr 2, E.R. 2
proteinId111470	-0.655222	0.0226202	-0.801356	0.00258035	-0.146134	0.625726	112.15	90.2469	52.8299	KOG1187	Serine/threonine protein kinase	Signal transduction mechanisms	CELLULAR PROCESSES AND SIGNALING	nucl 19, cyto_nucl 12, mito 5
proteinId111616	-1.51962	0.0322566	1.19737	0.0655648	2.71699	2.42608e-05	2.14753	3.2318	7.63296	KOG4157	beta-1,6-N-acetylglucosaminyltransferase, contains WSC domain	Carbohydrate transport and metabolism	METABOLISM	extr 21, mito 2, E.R. 2
proteinId111726	2.3574	0.00580423	8.38927	4.54444e-29	6.03186	1.12462e-44	3.17903	0.289476	112.84					mito 6, plas 6, E.R. 6, golg 4, extr 2, cyto 1, pero 1, vacu 1, cyto_pero 1
proteinId111749	0.501683	0.725483	2.0473	0.0650053	1.54562	0.143599	1.25081	0.440419	2.01892					cyto 9.5, extr 8, cyto_nucl 6.5, mito 5, nucl 2.5
proteinId111944	0.544496	0.56267	3.65757	5.64081e-07	3.11307	7.71907e-06	2.41194	0.835241	11.6304					nucl 15, mito 7, pero 2.5, cyto_pero 2.5
proteinId112014	1.63678	0.0246706	8.71165	3.56722e-43	7.07488	3.97511e-39	5.50054	0.872944	424.589					plas 16, mito 7, E.R. 2, golg 2
proteinId112030	0.996813	0.135658	3.26359	1.70434e-08	2.26677	7.58426e-05	19.3564	5.00524	51.1112					nucl 13, cyto_nucl 11.5, cyto 8, mito 6
proteinId112179	-1.99085	1.14708e-05	-4.57725	2.88399e-25	-2.58639	8.95162e-09	38.9919	79.5573	3.3099	KOG0581	Mitogen-activated protein kinase kinase (MAP2K)	Signal transduction mechanisms	CELLULAR PROCESSES AND SIGNALING	nucl 13.5, cyto_nucl 12, cyto 9.5, mito 4	Pkinase,Pkinase_Tyr
proteinId112247	-0.448752	0.461916	-1.96094	0.000258294	-1.51219	0.00569886	11.2576	7.81457	2.00695	KOG2177	Predicted E3 ubiquitin ligase	Posttranslational modification, protein turnover, chaperones	CELLULAR PROCESSES AND SIGNALING	nucl 13.5, cyto_nucl 9.5, mito 5, cyto 4.5, pero 4	zf-C3HC4,zf-C3HC4_2,zf-C3HC4_4,zf-RING_2,zf-RING_UBOX
proteinId112249	0.418925	0.696976	6.2207	1.32411e-16	5.80177	1.19771e-19	2.14378	0.772452	67.8483					mito 11, plas 7, mito_nucl 7
proteinId112283	0.160012	0.815886	2.84352	2.71485e-08	2.68351	1.70166e-07	9.09075	4.10176	30.9796	KOG1699	O-acetyltransferase	General function prediction only	POORLY CHARACTERIZED	plas 18, mito 3, E.R. 3, golg 2	Cas1_AcylT,PC-Esterase
proteinId112287	-2.36158	2.79117e-09	-6.88205	9.04874e-63	-4.52047	2.01999e-27	115.212	307.055	2.56636	KOG3049	Succinate dehydrogenase, Fe-S protein subunit	Energy production and conversion	METABOLISM	mito 26	Fer2_3,Fer4_17,Fer4_8
proteinId112352	-0.744675	0.139409	-1.26236	0.00546535	-0.517681	0.289762	9.63282	8.22573	3.48774					mito 14, extr 5, cyto 4, nucl 1, plas 1, pero 1, E.R. 1	MDM31_MDM32
proteinId112433	0.220931	0.895768	1.9352	0.131568	1.71426	0.17897	0.867963	0.363662	1.58268	KOG1187	Serine/threonine protein kinase	Signal transduction mechanisms	CELLULAR PROCESSES AND SIGNALING	mito 13.5, cyto_mito 9.333, nucl 8.5, cyto_nucl 6.833, cyto 4
proteinId112434	0.518162	0.674427	1.14877	0.257943	0.630613	0.542152	2.37411	0.817465	1.93046	KOG1187	Serine/threonine protein kinase	Signal transduction mechanisms	CELLULAR PROCESSES AND SIGNALING	mito 13, nucl 10, cyto 3
proteinId112469	-1.00498	0.206825	-3.94154	8.30121e-09	-2.93656	2.50454e-05	288.799	293.455	18.3052	KOG1286	Amino acid transporters	Amino acid transport and metabolism	METABOLISM	plas 27	AA_permease,AA_permease_2
proteinId112519	1.49584	0.141466	6.30291	4.98566e-14	4.80707	7.68757e-16	2.01416	0.323942	30.9428					plas 14, mito 7, E.R. 4
proteinId112520	-1.29202	0.386217	7.01637	2.05556e-14	8.30839	8.39531e-17	0.28954	0.392151	63.1867					mito 7.5, plas 6, extr 6, cyto_mito 6, cyto 3.5, nucl 2, pero 2
proteinId112523	-0.135738	0.817599	-2.89572	4.07049e-09	-2.75998	2.30552e-08	7.34532	4.16686	0.555045	KOG0583	Serine/threonine protein kinase	Signal transduction mechanisms	CELLULAR PROCESSES AND SIGNALING	nucl 19.5, cyto_nucl 13.5, cyto 6.5	Pkinase,Pkinase_Tyr,Kinase-like
proteinId112656	2.35255	0.101818	-0.0450224	0.991339	-2.39757	0.0748768	2.85705	0.249632	0.240744					mito 24, cyto_nucl 2, nucl 1.5, cyto 1.5	BTB
proteinId112669	4.62576	1.0266e-06	3.10136	0.000925412	-1.5244	0.0599819	5.83021	0.104835	1.02933	KOG0039	Ferric reductase, NADH/NADPH oxidase and related proteins	Secondary metabolites biosynthesis, transport and catabolism	METABOLISM	plas 19, mito 4, E.R. 2, vacu 2, cyto_mito 2, mito_nucl 2	NAD_binding_6,Ferric_reduct,FAD_binding_8
proteinId112913	1.22199	0.447892	-1.31537	0.39024	-2.53737	0.0838336	1.52561	0.305934	0.111923					mito 23, cyto 2
proteinId112920	-0.357913	0.759282	2.21437	0.010346	2.57229	0.00233922	0.754141	0.494652	2.46254					extr 23, mito 1, plas 1, pero 1, E.R. 1
proteinId112971	0.989147	0.0882525	2.43466	2.02337e-06	1.44552	0.00422322	16.4228	4.22852	23.939					mito 23, nucl 2
proteinId112973	1.00429	0.0558633	2.45153	1.3879e-07	1.44724	0.000991215	3.43833	0.869893	4.96318	KOG4443	Putative transcription factor HALR/MLL3, involved in embryonic development	General function prediction only	POORLY CHARACTERIZED	nucl 22, cyto_nucl 14.5, cyto 5	SAP
proteinId113309	1.74427	0.300922	0.855359	0.590713	-0.888915	0.576926	3.43626	0.450225	0.918688					mito 16, cyto 6, extr 4
proteinId113410	1.48631	0.0271135	0.900143	0.162161	-0.586164	0.382954	68.5316	12.5818	24.3299					nucl 8.5, cyto_nucl 7.5, cyto 5.5, extr 5, mito 4, plas 3
proteinId113835	1.52406	0.405324	-3.17932	0.116088	-4.70338	0.0176841	1.66138	0.25802	0					cyto 9, nucl 7, mito 7, mito_nucl 7
proteinId113870	3.9694	6.36196e-09	5.45564	1.08658e-16	1.48624	0.0184722	30.227	0.899165	44.432					nucl 24.5, cyto_nucl 14
proteinId1139	-1.02161	0.000503933	1.85912	1.17752e-11	2.88072	6.97905e-26	693.117	726.951	2702.06					extr 27
proteinId113901	2.74327	0.115822	3.47214	0.0279511	0.728874	0.607039	1.16168	0.0563728	1.07437					extr 10, plas 8, mito 4, E.R. 4
proteinId11394	-0.783416	0.0231353	0.165571	0.636221	0.948988	0.00324884	29.7446	26.2697	30.1779	KOG1613	Exosomal 3'-5' exoribonuclease complex, subunit Rrp43	Translation, ribosomal structure and biogenesis	INFORMATION STORAGE AND PROCESSING	cyto 18, mito 6, nucl 1, pero 1, cysk 1	RNase_PH
proteinId114154	1.88022	0.0111852	-4.53942	0.00023263	-6.41964	1.29397e-07	19.9169	2.67449	0.0675374					cysk 15, mito 7, nucl 3
proteinId114181	0.544845	0.114611	0.0239082	0.959227	-0.520937	0.107308	54.9515	19.3868	20.1238	KOG4297	C-type lectin	Signal transduction mechanisms	CELLULAR PROCESSES AND SIGNALING	mito 16.5, mito_nucl 12, nucl 6.5, cyto 3
proteinId114190	1.8328	0.461657	5.00602	0.0140495	3.17322	0.0793908	0.178055	0	1.22457					mito 7, extr 6, nucl 4, pero 4, cyto 2, plas 2, golg 2
proteinId114198	2.78846	0.084123	4.7733	0.000883634	1.98484	0.0775719	0.823734	0.0381898	1.87705	KOG0608	Warts/lats-like serine threonine kinases	Cell cycle control, cell division, chromosome partitioning	METABOLISM	mito 15, nucl 8, cyto_nucl 6.5, cyto 3
proteinId114377	2.72135	0.00361569	5.25017	7.35277e-10	2.52882	0.000105284	3.19218	0.214301	9.86038					mito 12, nucl 8, cyto 6
proteinId114531	-0.682969	0.487671	6.1582	8.16357e-19	6.84117	6.41993e-24	0.429402	0.35859	28.4761					plas 18, mito 3, E.R. 3, cyto 1, extr 1, vacu 1
proteinId114599	-0.539215	0.548173	3.05226	3.77474e-06	3.59147	1.96064e-08	0.908375	0.681634	6.02649	KOG4725	Uncharacterized conserved protein	Function unknown	POORLY CHARACTERIZED	plas 13, extr 10, E.R. 2
proteinId114660	5.47575	0.00439604	5.65343	0.00176149	0.177674	0.91801	5.02293	0	2.93555					cysk 8, nucl 7, cyto 7, cyto_nucl 7
proteinId114732	1.17886	0.00878564	-2.07533	1.84014e-06	-3.25419	3.67132e-14	27.5891	6.22961	1.47768	KOG0488	Transcription factor BarH and related HOX domain proteins	General function prediction only	POORLY CHARACTERIZED	nucl 8, mito 8, mito_nucl 8, cyto 7	Fungal_trans,Zn_clus
proteinId114756	2.2887	0.223909	2.93246	0.0813347	0.643762	0.682191	1.73213	0.116628	1.48771					mito 17, nucl 7, extr 2
proteinId115010	2.86669	0.0577385	2.5864	0.0676919	-0.280293	0.846023	3.04022	0.160083	1.25885					nucl 15.5, cyto_nucl 11.333, cyto 6, cyto_mito 4.833, mito 2.5
proteinId115077	0.153025	0.714551	3.14372	2.20467e-24	2.99069	4.02233e-23	8.71515	4.00122	36.5243					nucl 21.5, cyto_nucl 13, cyto 3.5
proteinId115122	3.12733	0.121119	6.17724	0.000451807	3.04991	0.00558694	0.682729	0	3.30678					mito 15, nucl 8.5, cyto_nucl 6, cyto 2.5
proteinId115153	-0.320533	NA	3.69232	0.110366	4.01285	0.0869403	0	0	0.685607					mito 11, plas 7, extr 4, E.R. 3
proteinId115196	-0.0180609	0.972445	-2.47225	1.01881e-11	-2.45419	1.95357e-11	269.024	139.58	25.4883					nucl 21, cyto_nucl 14.5, cyto 4
proteinId115282	2.45654	0.0255909	-0.650672	0.606758	-3.10722	0.00426718	3.09471	0.268404	0.164199	KOG4177	Ankyrin	Cell wall/membrane/envelope biogenesis	CELLULAR PROCESSES AND SIGNALING	nucl 13.5, cyto_nucl 13.5, cyto 8.5, pero 3	Ank_2,Ank,Ank_4,Ank_3,Ank_5
proteinId115283	2.49367	0.00884646	6.23518	2.00846e-13	3.74151	2.19639e-10	3.43313	0.277275	25.322					plas 19, mito 4, E.R. 3
proteinId115348	1.04066	0.0305183	4.99838	3.05439e-33	3.95772	5.63307e-26	18.6284	4.59528	155.203					nucl 19, mito 7
proteinId115361	0.880067	0.047172	4.56984	1.76607e-33	3.68978	2.6661e-27	15.7007	4.32426	107.124					plas 14, mito 6, extr 4, golg 2
proteinId115365	0.019271	0.972583	-1.64671	2.63935e-05	-1.66598	2.50303e-05	125.368	63.0547	20.2837					nucl 14.5, mito 10, cyto_nucl 8.5
proteinId115447	-1.66695	3.15913e-07	-2.83742	9.92446e-18	-1.17047	0.000689968	13.1587	21.4666	3.03595					nucl 18, cyto 5, mito 3, cyto_pero 3
proteinId11552	2.7383	1.0403e-14	2.50962	5.85384e-13	-0.228682	0.54192	26.2704	1.98583	11.6513					nucl 14, cyto 7.5, cyto_mito 6, mito 3.5
proteinId115591	-1.60475	0.00051742	-0.136658	0.784643	1.46809	0.000994391	12.5946	19.7379	18.2524	KOG1911	Heterochromatin-associated protein HP1 and related CHROMO domain proteins	Chromatin structure and dynamics	INFORMATION STORAGE AND PROCESSING	nucl 12, mito 9, cyto 4	Neugrin
proteinId115653	0.731695	0.097769	-1.07904	0.00948012	-1.81074	8.29449e-06	10.8717	3.35346	1.61712	KOG2687	Spindle pole body protein, contains UNC-84 domain	Cell cycle control, cell division, chromosome partitioning	METABOLISM	mito 10, nucl 8.5, cyto_nucl 6, plas 3, cyto 2.5	Sad1_UNC
proteinId115713	0.0153894	0.974367	0.0476451	0.912236	0.0322557	0.936545	4.65218	2.34617	2.47586	KOG1801	tRNA-splicing endonuclease positive effector (SEN1)	RNA processing and modification	INFORMATION STORAGE AND PROCESSING	nucl 17, cyto 6, pero 4	SEN1_N,AAA_11,AAA_12,AAA_19,AAA_30
proteinId116632	0.951093	0.361026	-5.19986	0.0018202	-6.15095	0.000220526	5.07789	1.31735	0					nucl 19.5, cyto_nucl 13, cyto 5.5
proteinId116675	-0.269156	0.838036	-2.77807	0.0093998	-2.50892	0.0214243	7.6507	4.71954	0.604936					plas 11, extr 5, mito 4, E.R. 4, golg 2, cyto_mito 2, mito_nucl 2
proteinId116864	1.42314	0.0651734	5.28088	6.9544e-15	3.85774	9.02543e-09	24.2903	4.39119	189.859					plas 21, mito 3, E.R. 1, golg 1, vacu 1
proteinId116880	1.343	0.000440326	3.26802	1.78033e-20	1.92503	8.60009e-09	14.638	2.93008	29.2814	KOG1216	von Willebrand factor and related coagulation proteins	Extracellular structures	CELLULAR PROCESSES AND SIGNALING	nucl 17.5, cyto_nucl 11, mito 5, cyto 3.5
proteinId117082	-1.21027	0.00147487	-3.95737	3.95484e-24	-2.74709	4.33117e-12	19.7497	23.6482	1.52727	KOG0550	Molecular chaperone (DnaJ superfamily)	Posttranslational modification, protein turnover, chaperones	CELLULAR PROCESSES AND SIGNALING	nucl 23.5, cyto_nucl 14	TPR_11,TPR_1,TPR_2,TPR_16,TPR_19,TPR_14,TPR_12,TPR_17,TPR_7,TPR_8,Apc3
proteinId117243	2.38531	0.000255852	3.21001	1.81558e-07	0.824699	0.212295	70.7443	6.88356	67.8846					plas 19, mito 3, vacu 2, cyto_mito 2	Stb3
proteinId117284	0.810108	0.419048	0.778555	0.388404	-0.0315535	0.975364	4.08172	1.17275	2.11441					mito 9.5, cyto_mito 8.5, extr 7, cyto 6.5, nucl 3
proteinId117345	0.34295	0.648067	-0.176628	0.797015	-0.519578	0.426445	23.0537	9.34074	8.46273					nucl 20.5, cyto_nucl 11, mito 5
proteinId117408	4.63812	0.00315574	0.709717	0.701364	-3.9284	0.00406533	3.51167	0.0451375	0.0948236					nucl 16.5, cyto_nucl 12, cyto 6.5, mito 3
proteinId117461	0.0302869	0.978367	-5.9983	0.000200236	-6.02859	0.00020983	5.0288	2.51329	0					nucl 17, cyto_nucl 10.5, mito 7
proteinId117507	2.01433	0.159541	4.25767	0.00057926	2.24334	0.0245915	1.1005	0.109114	2.89988					nucl 16.5, cyto_nucl 12, cyto 6.5, mito 2, pero 2
proteinId117577	0.353311	0.38496	-2.99274	4.48731e-14	-3.34605	1.98749e-17	13.56	5.43916	0.684552	KOG4443	Putative transcription factor HALR/MLL3, involved in embryonic development	General function prediction only	POORLY CHARACTERIZED	plas 21, nucl 5.5, cyto_nucl 3.5
proteinId117579	1.70659	0.293399	7.37081	1.93176e-08	5.66422	4.34015e-09	0.67983	0.072247	21.0061					mito 20, cyto 3, nucl 2, extr 2
proteinId117652	3.42817	0.0180083	4.93493	0.00019723	1.50676	0.100867	1.96908	0.0629111	3.06206					plas 12, cysk 6, mito 5, cyto 3
proteinId117661	0.786628	0.468552	-1.64543	0.0736961	-2.43206	0.00804205	70.0446	19.51	6.1164	KOG2466	Uridine permease/thiamine transporter/allantoin transport	Coenzyme transport and metabolism	METABOLISM	plas 27	Transp_cyt_pur
proteinId118309	-0.155921	0.823847	-3.63122	7.31345e-08	-3.4753	2.76521e-07	12.6347	7.22534	0.562414					plas 17, mito 3, extr 3, vacu 3
proteinId11832	-0.673752	0.498529	-0.55932	0.538615	0.114432	0.908471	2.25267	1.85322	1.26154					mito 11, nucl 9, cyto 5
proteinId118359	1.46516	0.00130526	2.68595	1.99584e-10	1.22079	0.00218772	35.4257	6.52799	43.6645					extr 11, mito 7, plas 4, E.R. 3
proteinId118386	2.98653	1.47789e-12	3.02953	1.73322e-13	0.0429978	0.932216	19025.1	1220.03	10309					mito 12, extr 7, cyto 3.5, cyto_nucl 3, plas 2
proteinId118787	2.76981	0.00106434	-4.77902	8.21245e-09	-7.54884	6.31963e-20	217.067	14.9106	0.475754	KOG1950	Glycosyl transferase, family 8 - glycogenin	Carbohydrate transport and metabolism	METABOLISM	nucl 21, cyto_nucl 13.333, cyto 3.5, cyto_mito 3.166	Glyco_transf_8
proteinId118893	2.08507	0.00263586	2.20154	0.000781342	0.116465	0.875903	7.4074	0.886314	4.30433	KOG3585	TBX2 and related T-box transcription factors	Transcription	INFORMATION STORAGE AND PROCESSING	nucl 12.5, cyto_nucl 10, cyto 4.5, mito 4, extr 3
proteinId119006	2.67547	0.0812652	5.00676	0.000217557	2.33129	0.0144247	1.24822	0.0644928	3.52748	KOG0382	Carbonic anhydrase	General function prediction only	POORLY CHARACTERIZED	nucl 24.5, cyto_nucl 13
proteinId119073	0.845543	0.318985	2.9516	2.60644e-05	2.10606	0.00128761	3.37494	0.946154	7.80262	KOG4297	C-type lectin	Signal transduction mechanisms	CELLULAR PROCESSES AND SIGNALING	nucl 23.5, cyto_nucl 13
proteinId119132	1.25116	0.0108438	0.835172	0.0792637	-0.415983	0.394592	10.6615	2.29	4.19122					nucl 15.5, cyto_nucl 13, cyto 9.5	Ank_2
proteinId119133	1.85887	0.000508536	4.51379	3.70361e-20	2.65491	2.00045e-09	11.0944	1.55106	37.5873					mito 15, nucl 5.5, cyto_nucl 5.5, cyto 4.5
proteinId119135	-2.12418	3.50617e-06	-4.18861	5.66512e-22	-2.06443	3.59585e-06	1120.9	2585.6	140.517	KOG3655	Drebrins and related actin binding proteins	Cytoskeleton	CELLULAR PROCESSES AND SIGNALING	extr 12, plas 6, vacu 4, mito 3
proteinId119280	0.466684	0.548207	0.71606	0.285055	0.249377	0.723325	5.67711	2.11127	3.56186					mito 14, nucl 7.5, cyto_nucl 6, cyto 3.5
proteinId119909	-0.370728	0.410354	-1.77857	2.31373e-06	-1.40784	0.000236381	63.8491	41.9206	12.3464	KOG2190	PolyC-binding proteins alphaCP-1 and related KH domain proteins	General function prediction only	POORLY CHARACTERIZED	nucl 13.5, cyto_nucl 10, cyto 5.5, cysk 5	KH_1,KH_3,KH_2,KH_4
proteinId119932	-2.5311	1.22391e-09	-4.19391	1.13299e-23	-1.66281	0.000127677	7.90171	23.4279	1.27357	KOG1839	Uncharacterized protein CLU1/cluA/TIF31 involved in mitochondrial morphology/distribution, also found associated with eIF-3	General function prediction only	POORLY CHARACTERIZED	cyto 12, cyto_nucl 10, mito 7, nucl 6	CLU,eIF3_p135,CLU_N,TPR_12,TPR_10
proteinId120032	-0.126837	0.84849	4.85477	4.73192e-25	4.98161	2.0133e-27	9.68111	5.43328	167.361					mito 18.5, cyto_mito 11.5, nucl 4, cyto 3.5
proteinId120074	-0.00943226	0.982011	-1.52855	1.47984e-07	-1.51912	1.94638e-07	51.1319	26.3828	9.28442	KOG0581	Mitogen-activated protein kinase kinase (MAP2K)	Signal transduction mechanisms	CELLULAR PROCESSES AND SIGNALING	mito 21.5, cyto_mito 13, cyto 3.5	Pkinase,Pkinase_Tyr,Kinase-like
proteinId120373	-0.169868	0.809228	5.0693	1.43841e-25	5.23916	4.86967e-30	2.50351	1.43659	51.5357					plas 19, E.R. 4, mito 3
proteinId120382	-2.49379	2.48198e-15	-1.09511	0.000461093	1.39868	1.08098e-05	12.9082	37.7451	18.0035	KOG4462	WASP-interacting protein VRP1/WIP, contains WH2 domain	Cytoskeleton	CELLULAR PROCESSES AND SIGNALING	nucl 19, mito 4, cyto 4, cyto_mito 4
proteinId120387	-1.0984	0.0922675	-1.56133	0.0108609	-0.462929	0.49312	4.00126	4.4549	1.51877	KOG1878	Nuclear receptor coregulator SMRT/SMRTER, contains Myb-like domains	Transcription	INFORMATION STORAGE AND PROCESSING	mito 11, extr 9, plas 4, nucl 1, E.R. 1, vacu 1
proteinId120577	0.349851	0.795508	6.95256	6.10217e-15	6.60271	1.49441e-21	0.499492	0.18379	28.0193					mito 10, nucl 9, extr 6, cyto_mito 6
proteinId120685	6.50512	3.45964e-09	11.609	3.28983e-28	5.10392	8.40695e-26	12.1021	0.0314396	223.074					mito 10, nucl 6, cyto_mito 6, extr 3
proteinId120737	1.76888	2.11336e-05	2.79073	1.32574e-12	1.02186	0.00767692	34.3316	5.11084	36.734					cyto_nucl 8.333, nucl 8, cyto 6.5, mito 6, cyto_pero 5.666, pero 3.5
proteinId120749	2.26005	0.0278503	2.87842	0.00232099	0.618372	0.548411	23.5047	2.26003	18.9149					extr 21, mito 5
proteinId120885	4.07472	0.001622	6.43189	7.67759e-08	2.35717	0.000212708	1.59691	0.0287057	4.42394					extr 17, mito 3, plas 3, pero 2, cyto_mito 2
proteinId120971	-1.56052	0.000962874	-1.31089	0.00374566	0.24963	0.625726	16.7791	26.0122	10.5821					plas 20, mito 3, vacu 2
proteinId120973	1.32695	0.131199	1.49246	0.062133	0.165515	0.854848	22.5909	4.57722	13.5485					extr 12, plas 6, mito 3, golg 3, E.R. 2, cyto_mito 2
proteinId12099	0.149496	0.879944	3.11564	1.16171e-05	2.96614	1.53454e-05	2.21618	1.03205	9.66554					cysk 11, cyto 7, nucl 4, cyto_pero 4
proteinId121176	2.36699	0.0591131	6.22493	1.09464e-08	3.85794	3.54083e-07	1.34387	0.101047	10.9753					nucl 21, cyto 4
proteinId121189	4.83623	4.58027e-11	7.24845	1.0689e-24	2.41222	2.68145e-09	10.6973	0.167833	30.1126					mito_nucl 8.666, nucl 8.5, mito 8.5, cyto_nucl 8.333, cyto_mito 8.333
proteinId121196	3.26003	0.101275	6.22558	0.000370046	2.96555	0.00569445	1.1401	0	5.17472					nucl 22.5, cyto_nucl 14, cyto 2.5
proteinId121197	-0.829345	0.14635	1.98464	5.93374e-05	2.81398	1.1513e-08	8.60238	7.97752	32.9303					cyto 7.5, mito 7, extr 6, cyto_nucl 4.5, golg 3
proteinId121345	-0.0194595	0.980454	-0.293095	0.633746	-0.273635	0.662338	6.27577	3.23671	2.67057					nucl 19, mito 3, pero 3	Fungal_trans,Zn_clus
proteinId121373	-1.81355	0.00473478	-5.85935	8.56535e-09	-4.04581	0.000108055	4.76973	8.77627	0.118576					nucl 15, cyto_nucl 13.833, cyto 10.5, cyto_mito 6.666
proteinId121470	-2.33108	0.288406	1.23984	0.519527	3.57093	0.0649838	0.108943	0.54094	1.51635					mito 16, cyto_nucl 6, nucl 4.5, cyto 4.5
proteinId121481	2.44978	NA	-0.00505357	0.998233	-2.45484	0.308891	0.853706	0	0					extr 10, mito 9, cyto 3.5, cyto_nucl 2.5, pero 2
proteinId121492	5.46756	0.000157834	12.1595	1.73282e-19	6.69198	2.76838e-73	4.88509	0	272.569					plas 18, E.R. 5, mito 3
proteinId121547	0.762776	NA	1.02314	0.668177	0.260369	0.918115	0.250458	0.0565365	0.176015					mito 9, plas 5, extr 5, cyto 4, E.R. 2
proteinId121550	2.7484	NA	0.609554	0.78211	-2.13885	0.27059	1.14447	0.0519303	0.0956166					nucl 15.5, cyto_nucl 11, cyto 5.5, mito 3
proteinId121565	4.97064	0.00668103	5.61351	0.00104148	0.642875	0.564233	2.79851	0	2.35597					nucl 18.5, cyto_nucl 13.5, cyto 7.5
proteinId121585	-0.253487	0.592249	0.0501654	0.918474	0.303652	0.469619	49.8516	30.1142	31.8973	KOG1289	Amino acid transporters	Amino acid transport and metabolism	METABOLISM	plas 23, vacu 2	AA_permease_2,AA_permease
proteinId121609	1.33642	0.0381163	4.29725	1.45645e-14	2.96084	2.34688e-10	1.59064	0.315257	6.59377	KOG0504	FOG: Ankyrin repeat	General function prediction only	POORLY CHARACTERIZED	nucl 16.5, cyto_nucl 12, cyto 6.5, cysk 2	Ank,Ank_4,Ank_2,Ank_5,Ank_3
proteinId121637	0.0966597	0.897867	1.09369	0.0564588	0.997032	0.0882214	29.3977	14.3392	31.6852					extr 14, mito 7, E.R. 3, cyto 1, plas 1, pero 1, cyto_pero 1
proteinId122190	2.07953	0.130893	2.61888	0.0357747	0.539354	0.66047	1.63928	0.172652	1.30669					extr 11, mito 7, plas 5, pero 2
proteinId122207	1.28404	0.00623452	0.590646	0.199439	-0.693398	0.133031	27.1575	5.62142	8.68145	KOG0202	Ca2+ transporting ATPase	Inorganic ion transport and metabolism	METABOLISM	plas 19, E.R. 4, pero 2, vacu 2	E1-E2_ATPase,Cation_ATPase_C,Hydrolase,Hydrolase_like2,HAD,Hydrolase_3
proteinId122211	0.85913	0.1093	-0.445855	0.394941	-1.30499	0.00822819	19.3273	5.42996	4.07568	KOG0202	Ca2+ transporting ATPase	Inorganic ion transport and metabolism	METABOLISM	nucl 10, plas 7, cyto 6, mito 1, extr 1, pero 1, vacu 1	Cation_ATPase_N
proteinId122274	2.99145	0.00734087	2.36974	0.0272122	-0.62171	0.548659	4.85733	0.276382	1.63704	KOG1198	Zinc-binding oxidoreductase	General function prediction only	POORLY CHARACTERIZED	cyto 10, cysk 7, mito 5, plas 5, cyto_nucl 5, cyto_pero 5
proteinId122277	0.278161	0.839479	5.69364	7.26753e-10	5.41548	8.20423e-12	0.744343	0.302859	18.6341					nucl 11, cyto_nucl 10, cyto 7, mito 5, pero 3
proteinId122397	2.7565	0.0553776	-2.94473	0.130982	-5.70123	0.00209836	1.50627	0.0996278	0	KOG2806	Chitinase	Carbohydrate transport and metabolism	METABOLISM	nucl 21, cyto_nucl 13.5, cyto 4
proteinId122408	-1.17605	0.000333957	-0.235655	0.484717	0.940391	0.00319643	37.6156	43.4525	37.6512					mito 15, cyto 3, plas 2, extr 2, cyto_nucl 2, pero 2, E.R. 2
proteinId12244	-0.3293	0.466562	0.373718	0.34499	0.703018	0.0707192	22.8648	14.5791	19.3178	KOG2121	Predicted metal-dependent hydrolase (beta-lactamase superfamily)	General function prediction only	POORLY CHARACTERIZED	nucl 14, cyto 10, pero 2	Lactamase_B_2,Lactamase_B_4,Lactamase_B
proteinId122479	0.925958	0.134957	-6.62736	9.3318e-06	-7.55332	4.65566e-07	29.1794	7.80984	0					mito 13, extr 7, nucl 3, cyto 3, cyto_nucl 3
proteinId12251	-0.18423	0.779032	0.586956	0.26882	0.771186	0.138577	4.1345	2.41107	3.7234	KOG1426	FOG: RCC1 domain	Function unknown	POORLY CHARACTERIZED	cyto 18, cyto_nucl 11.833, cyto_pero 9.833, nucl 4.5	RCC1,RCC1_2
proteinId122635	1.05583	0.0011116	-1.47343	1.36708e-06	-2.52926	7.37777e-17	479.278	117.974	43.2135	KOG0254	Predicted transporter (major facilitator superfamily)	General function prediction only	POORLY CHARACTERIZED	plas 25	Sugar_tr,MFS_1,MFS_2
proteinId122718	0.534758	0.446066	1.01947	0.0903814	0.484712	0.431908	5.03764	1.7695	3.72302	KOG1721	FOG: Zn-finger	General function prediction only	POORLY CHARACTERIZED	nucl 23.5, cyto_nucl 13	zf-C2H2_4,zf-C2H2
proteinId122869	2.56021	0.00383071	1.68006	0.0501384	-0.880152	0.31265	8.73105	0.713736	2.46657	KOG2618	Uncharacterized conserved protein	Function unknown	POORLY CHARACTERIZED	mito 16.5, cyto_mito 10, nucl 7	DUF159
proteinId122886	0.91945	0.0653855	-0.510159	0.299154	-1.42961	0.00202833	18.1181	4.87555	3.46302					extr 12, mito 7, plas 6
proteinId122921	-0.239452	0.491644	1.64989	4.34234e-09	1.88934	2.14556e-11	216.525	130.27	418.966	KOG0660	Mitogen-activated protein kinase	Signal transduction mechanisms	CELLULAR PROCESSES AND SIGNALING	cyto 12, nucl 11, pero 3	Pkinase,Pkinase_Tyr
proteinId122968	-0.1613	0.742833	-2.06987	3.20065e-07	-1.90857	2.58781e-06	22.5661	12.8747	3.0966					nucl 22.5, cyto_nucl 13, cyto 2.5
proteinId123091	3.05607	1.54002e-10	3.4483	9.47835e-14	0.392235	0.448225	143.308	8.56128	97.6821	KOG2992	Nucleolar GTPase/ATPase p130	Nuclear structure	CELLULAR PROCESSES AND SIGNALING	nucl 14, cyto 9, plas 1, pero 1, E.R. 1, vacu 1	FHA
proteinId123157	-1.2395	0.47332	-2.47566	0.103218	-1.23616	0.448842	1.42453	1.97984	0.280392					cyto 13, cyto_nucl 13, nucl 11
proteinId123185	-0.142109	0.844619	-2.45508	8.15237e-05	-2.31297	0.000211558	14.3746	8.09709	1.44472	KOG1187	Serine/threonine protein kinase	Signal transduction mechanisms	CELLULAR PROCESSES AND SIGNALING	mito 16, nucl 9.5, cyto_nucl 6
proteinId123369	1.63656	0.0983193	4.16985	1.10141e-06	2.53329	0.000369176	1.41826	0.221383	4.52684					nucl 10, mito 6, cyto 5, extr 5
proteinId123373	-0.20976	0.905224	3.57466	0.00298961	3.78442	0.000793838	0.327369	0.190758	2.80043					plas 10, extr 8, mito 4, cyto 2, E.R. 2, mito_nucl 2
proteinId123713	1.08973	0.301082	-3.76251	0.00577666	-4.85225	0.000307974	3.94686	0.926981	0.0420937					mito 8, nucl 7.5, cyto_nucl 6, plas 4, cyto 3.5, golg 2
proteinId123740	3.92361	NA	-0.0101416	0.998233	-3.93375	0.0926611	1.6175	0	0					plas 9, mito 8, extr 4, E.R. 4, mito_nucl 4
proteinId123770	3.57831	0.0104922	6.25522	8.49814e-07	2.67692	0.00103048	1.44571	0.0365762	5.15163					mito 18, nucl 4, cyto 4, cyto_nucl 4	DZR
proteinId123777	4.03606	0.0126889	10.5234	3.98934e-13	6.48731	9.29582e-37	1.64715	0	81.2507					mito 8, plas 4, extr 4, E.R. 4, nucl 3, golg 2
proteinId123826	1.07972	0.460271	1.76159	0.1609	0.681873	0.600252	1.51797	0.341166	1.32936					mito 9, cyto 7, cysk 7, pero 3	CHAT
proteinId123840	2.35561	0.000698296	-0.174497	0.835356	-2.5301	0.000164178	3.86631	0.373892	0.339702					mito 14, nucl 6, cyto 5
proteinId123934	2.94339	0.000176631	4.39146	2.83215e-09	1.44808	0.0611034	36.1219	2.19539	51.7213	KOG1472	Histone acetyltransferase SAGA/ADA, catalytic subunit PCAF/GCN5 and related proteins	Chromatin structure and dynamics	INFORMATION STORAGE AND PROCESSING	extr 21, vacu 2, nucl 1, mito 1, cyto 1, cyto_nucl 1, E.R. 1, cyto_mito 1, mito_nucl 1
proteinId123963	-2.03057	0.415643	3.73566	0.0383329	5.76623	0.00363297	0	0.0547102	1.15762					nucl 19, cyto_nucl 14.5, cyto 6
proteinId123994	-0.852056	0.100389	-1.79317	0.000190301	-0.941116	0.0615197	17.547	16.1607	4.70593					extr 9, plas 8, mito 4, E.R. 3, nucl 1, cyto 1, cyto_nucl 1, pero 1, cyto_pero 1
proteinId124075	1.93567	0.000510051	-0.772605	0.167589	-2.70827	3.56697e-07	36.7567	4.90026	2.91971	KOG1874	KEKE-like motif-containing transcription regulator (Rlr1)/suppressor of sin4	Transcription	INFORMATION STORAGE AND PROCESSING	mito 13, nucl 12.5, cyto_nucl 7.5	SAM_2,SAM_1,PH
proteinId124128	-0.45993	0.121756	-2.01314	3.15694e-14	-1.55321	7.10092e-09	72.9263	51.3213	12.928	KOG2743	Cobalamin synthesis protein	Coenzyme transport and metabolism	METABOLISM	cyto 16, cyto_mito 11.333, cyto_nucl 8.833, mito 5.5, extr 4	cobW
proteinId124269	-0.23389	0.846238	-2.36786	0.0200655	-2.13397	0.0392474	4.79902	2.94656	0.527953					extr 16, mito 6, plas 3, mito_nucl 3
proteinId124287	2.15971	0.149692	3.96517	0.00252669	1.80547	0.107895	0.9002	0.0799049	1.78977					nucl 8, cyto_nucl 8, mito 7, cyto 6, extr 3
proteinId124346	-1.83698	0.000810611	-8.30362	8.2339e-52	-6.46664	1.37514e-31	434.237	794.51	2.35496	KOG1216	von Willebrand factor and related coagulation proteins	Extracellular structures	CELLULAR PROCESSES AND SIGNALING	extr 17, plas 4, vacu 4
proteinId124370	5.54931	1.46337e-06	8.878	4.7291e-16	3.32869	2.56795e-12	5.84235	0.0363688	31.0908					plas 15, E.R. 5, mito 2, pero 2, vacu 2	RTA1
proteinId1244	-0.132001	0.733261	2.11803	3.37849e-13	2.25003	1.08492e-14	70.0932	39.6201	176.717					extr 9, cyto 7.5, cyto_nucl 5.5, mito 5, nucl 2.5	DUF2407_C,DUF2407
proteinId124477	-0.614582	NA	-3.1996	0.146586	-2.58501	0.258231	0.288234	0.247731	0					cyto 10, mito 9, extr 4, nucl 2
proteinId124518	5.30701	0.00369763	5.58485	0.00117443	0.277835	0.827589	3.63283	0	2.29888					plas 10, cyto 8.5, cyto_nucl 6, mito 5, nucl 2.5
proteinId124542	0.820653	0.0397737	1.44533	6.87286e-05	0.62468	0.093333	9.99378	2.86934	8.02238	KOG0201	Serine/threonine protein kinase	Signal transduction mechanisms	CELLULAR PROCESSES AND SIGNALING	nucl 17, cyto_nucl 12.5, cyto 6, mito 3	Pkinase,Pkinase_Tyr
proteinId124611	0.087805	0.820863	0.344123	0.267422	0.256318	0.424797	10.0478	4.84261	6.29219	KOG0613	Projectin/twitchin and related proteins	Cytoskeleton	CELLULAR PROCESSES AND SIGNALING	nucl 12, mito 10, cyto 4	DUF4045,Gelsolin
proteinId124633	2.44222	0.266531	5.84882	0.00159227	3.4066	0.0111455	0.351258	0	2.35285					mito 18, cyto 2, plas 2, E.R. 2, nucl 1, extr 1, vacu 1, cyto_pero 1
proteinId124715	-0.895639	0.212475	-0.358859	0.600954	0.53678	0.437504	10.5326	10.1124	8.09325	KOG1216	von Willebrand factor and related coagulation proteins	Extracellular structures	CELLULAR PROCESSES AND SIGNALING	nucl 18.5, cyto_nucl 13, cyto 6.5
proteinId124833	2.22057	NA	3.68232	0.0857614	1.46175	0.464757	0.304987	0	0.53511					nucl 13, cyto 11, extr 1, pero 1, golg 1
proteinId124864	-3.59863	2.15394e-07	-3.27362	1.15062e-06	0.325015	0.676245	8.21106	55.6099	5.53442	KOG1269	SAM-dependent methyltransferases	General function prediction only	POORLY CHARACTERIZED	cyto 12, cyto_nucl 9.833, cyto_pero 8.333, nucl 6.5, pero 3.5, mito 3	Methyltransf_23,Methyltransf_31,Methyltransf_11,Methyltransf_18
proteinId124928	0.608954	0.478313	4.52109	4.47761e-11	3.91213	8.40293e-09	6.3863	2.11826	53.4252					cyto 13.5, cysk 9, cyto_nucl 8.333, cyto_pero 7.666	Methyltransf_23,Methyltransf_31,Methyltransf_11,Methyltransf_18
proteinId12493	0.884141	0.343088	5.22083	1.50055e-12	4.33669	8.19583e-12	2.85888	0.765855	32.2823					nucl 18, cyto_nucl 13.5, cyto 7
proteinId125094	2.24731	0.116492	3.29853	0.0101368	1.05123	0.381081	1.67767	0.149439	1.94537					nucl 14.5, cyto_nucl 11.5, cyto 7.5, mito 3
proteinId125601	4.01907	2.59133e-13	5.93297	8.24812e-29	1.91391	0.00049455	771.753	23.7966	1568.06					nucl 19.5, cyto_nucl 12.5, mito 5
proteinId125609	3.39753	2.13009e-06	-0.279547	0.731779	-3.67707	1.42217e-07	53.9682	2.52635	2.09023					mito 13, nucl 7.5, cyto_nucl 6.5, cyto 4.5
proteinId125857	2.03879	0.0156634	2.34554	0.00298549	0.306751	0.693877	5.37329	0.643661	3.50654					nucl 21.5, cyto_nucl 16, cyto 5.5
proteinId125882	3.04939	0.0280917	3.18513	0.0141811	0.13574	0.910839	1.82915	0.08767	1.06832					mito 19, nucl 4, cyto 3
proteinId125885	1.61217	0.093673	6.67924	6.53038e-17	5.06707	1.65865e-21	1.12658	0.166705	20.6725					mito 13, nucl 7, cyto_mito 7
proteinId126087	-0.300262	0.312562	1.96611	1.25446e-15	2.26637	2.38907e-20	36.5045	23.0347	92.2834	KOG1485	Mitochondrial Fe2+ transporter MMT1 and related transporters (cation diffusion facilitator superfamily)	Inorganic ion transport and metabolism	METABOLISM	plas 18, E.R. 7	Cation_efflux
proteinId12615	-3.16395	1.96718e-30	-1.69166	7.3484e-10	1.4723	1.21649e-07	1097.78	5056.52	1593.84	KOG0400	40S ribosomal protein S13	Translation, ribosomal structure and biogenesis	INFORMATION STORAGE AND PROCESSING	mito 20, cyto 5	Ribosomal_S13_N,Ribosomal_S15
proteinId126322	2.65546	1.16933e-05	8.04501	2.76403e-47	5.38955	4.63868e-43	10.7559	0.824494	242.662					mito 17.5, cyto_mito 11, cyto 3.5, nucl 2, plas 2
proteinId126333	2.01682	0.0111333	1.04803	0.184792	-0.96879	0.197643	10.0472	1.22219	2.6658					nucl 21, cyto_nucl 12.5, mito 4
proteinId126370	-0.78751	0.0889687	-2.13448	1.23663e-06	-1.34697	0.00290163	22.2895	19.7254	4.53817	KOG3741	Poly(A) ribonuclease subunit	RNA processing and modification	INFORMATION STORAGE AND PROCESSING	mito 11, nucl 7.5, cyto_nucl 7.5, cyto 6.5
proteinId126582	0.154289	0.674171	1.80366	1.17516e-10	1.64937	3.95245e-09	34.5986	15.9258	57.1203	KOG2530	Members of tubulin/FtsZ family	Cytoskeleton	CELLULAR PROCESSES AND SIGNALING	nucl 9, cyto_nucl 9, cyto 7, pero 5, mito 2, extr 1, golg 1, cysk 1, vacu 1	Tubulin_3,Misat_Tub_SegII
proteinId126597	4.54783	5.86325e-16	0.278028	0.700931	-4.2698	1.02471e-15	24.1048	0.506742	0.627697	KOG1216	von Willebrand factor and related coagulation proteins	Extracellular structures	CELLULAR PROCESSES AND SIGNALING	mito 10, plas 6, extr 6, pero 2, golg 2
proteinId126698	0.535791	0.0524957	1.43366	6.10948e-09	0.89787	0.000375728	313.495	110.44	305.233	KOG1268	Glucosamine 6-phosphate synthetases, contain amidotransferase and phosphosugar isomerase domains	Cell wall/membrane/envelope biogenesis	CELLULAR PROCESSES AND SIGNALING	plas 8, cyto 6, cyto_nucl 6, nucl 4, mito 3, pero 2, vacu 2	SIS,GATase_2,GATase_6,GATase_7,GATase_4
proteinId126792	0.785268	0.16958	-0.555388	0.328419	-1.34066	0.011326	11.4051	3.37637	2.33179					mito 12, cyto 7.5, nucl 6, cyto_pero 5
proteinId127116	0.269523	0.742652	4.07947	2.45552e-11	3.80995	3.18573e-10	6.14443	2.64299	48.4669					nucl 16.5, cyto_nucl 11.5, cyto 5.5, mito 3
proteinId127120	3.88811	0.0303585	7.69175	1.69552e-06	3.80364	1.43035e-06	1.12359	0	8.87316					mito 18, cyto_nucl 4, nucl 3.5, cyto 3.5
proteinId127153	-0.450232	0.818726	4.76301	0.000651053	5.21324	0.000137783	0.396703	0.295465	11.3788					cysk 19, cyto 3, nucl 1, mito 1, plas 1, extr 1, pero 1, mito_nucl 1
proteinId127239	1.03549	0.609481	4.61743	0.00309353	3.58193	0.00806228	0.387759	0.0709538	3.11209					mito 14, nucl 5, cyto 2, plas 2, extr 2
proteinId127308	2.91243	NA	2.9346	0.182576	0.0221654	0.991869	0.733503	0	0.405113					mito 12, cyto 9.5, cyto_nucl 6.5, nucl 2.5
proteinId127428	0.209615	0.593364	2.38327	8.22689e-15	2.17365	1.65789e-12	28.09	12.4539	66.7319					nucl 15, cyto 5, pero 5, cyto_pero 5	Fungal_trans,Zn_clus
proteinId127487	3.4672	2.42139e-05	1.24915	0.147662	-2.21805	0.0026641	10.2081	0.44427	1.11201	KOG1721	FOG: Zn-finger	General function prediction only	POORLY CHARACTERIZED	nucl 7, mito 7, mito_nucl 7, extr 4
proteinId127542	6.90872	3.06467e-05	5.97612	0.000187042	-0.932607	0.323669	4.55041	0	1.2001					mito 23, cyto 4
proteinId127650	2.49453	NA	-0.00638508	0.998233	-2.50091	0.302745	0.371122	0	0					nucl 19.5, cyto_nucl 14.5, cyto 6.5
proteinId127985	4.40972	0.0236697	5.42205	0.00252738	1.01233	0.454643	1.96417	0	2.20523					extr 17, mito 8
proteinId128308	0.59512	0.104056	0.804599	0.0151641	0.209479	0.565454	53.0662	17.8104	31.8818	KOG0581	Mitogen-activated protein kinase kinase (MAP2K)	Signal transduction mechanisms	CELLULAR PROCESSES AND SIGNALING	nucl 13.5, mito 10, cyto_nucl 10	Pkinase,Pkinase_Tyr,Kinase-like
proteinId128563	-4.54243	5.95357e-33	-6.69562	9.71868e-65	-2.15318	1.29343e-07	14.5926	178.654	1.70567	KOG1051	Chaperone HSP104 and related ATP-dependent Clp proteases	Posttranslational modification, protein turnover, chaperones	CELLULAR PROCESSES AND SIGNALING	mito 22, cyto_mito 12.833, mito_nucl 12.333	AAA_2,AAA,AAA_5,AAA_16,AAA_22,Sigma54_activat,AAA_14,NACHT
proteinId128624	4.70808	1.62284e-13	3.51356	2.87069e-08	-1.19452	0.0320149	14.4965	0.262185	3.27282					mito 13, nucl 11, cyto 2
proteinId128626	2.84269	0.189436	5.47897	0.00354463	2.63628	0.0646695	0.563375	0	2.2173					mito 17, plas 7, nucl 2
proteinId128697	3.80307	1.30463e-05	8.28522	1.88787e-24	4.48215	5.12733e-31	9.92215	0.284333	118.602					extr 21, E.R. 4
proteinId128711	-2.12352	0.00190419	-0.83798	0.214476	1.28554	0.0565311	48.8524	115.927	65.4844					cyto 13, mito 9, extr 2, pero 2
proteinId128728	2.1247	2.6577e-06	7.01442	1.11626e-63	4.88972	8.06607e-49	19.5672	2.24125	310.304					cyto_nucl 7.5, nucl 6.5, mito 6, cyto 5.5, extr 5, plas 2
proteinId128737	0.064432	0.888289	-3.31266	1.93798e-19	-3.37709	4.34443e-20	15.7743	7.68373	0.77688	KOG2102	Exosomal 3'-5' exoribonuclease complex, subunit Rrp44/Dis3	Translation, ribosomal structure and biogenesis	INFORMATION STORAGE AND PROCESSING	mito 12, nucl 9, cyto_nucl 8, cyto 5	RNB
proteinId128780	-2.27088	0.0012576	-0.478633	0.506945	1.79225	0.00869007	255.253	670.988	489.429					nucl 17.5, cyto_nucl 10, extr 5, mito 3	DUF3602
proteinId128787	-1.80395	0.0309977	-3.86777	2.71627e-06	-2.06381	0.0167522	6.98202	13.1899	0.847867					mito 16, nucl 8, cyto 2
proteinId128818	0.794481	0.0148083	0.716356	0.0199933	-0.0781256	0.824592	22.1055	6.49009	10.9029	KOG2571	Chitin synthase/hyaluronan synthase (glycosyltransferases)	Cell wall/membrane/envelope biogenesis	CELLULAR PROCESSES AND SIGNALING	plas 27	Chitin_synth_1,Chitin_synth_1N,Chitin_synth_2,Glyco_trans_2_3,Glyco_tranf_2_3
proteinId128939	1.60068	0.0870734	2.2216	0.00892073	0.620911	0.464637	4.1925	0.668542	3.38081					nucl 13.5, cyto_nucl 11.5, cyto 8.5, cysk 4
proteinId129061	3.73044	1.68841e-06	5.05484	9.95801e-12	1.3244	0.0290927	3.62933	0.123609	4.76747					mito 17, nucl 7, cyto 3
proteinId129667	-0.552938	0.630309	-5.90767	0.000389798	-5.35473	0.00155318	2.29514	1.77657	0					mito 11, extr 9, nucl 4, cyto 3
proteinId129684	-0.701113	0.294991	-0.549979	0.378827	0.151134	0.825579	4.58532	3.85659	2.66415					nucl 9, mito 8, extr 6, cyto_nucl 6
proteinId12971	0.703521	0.134988	5.80342	2.88226e-48	5.0999	4.55819e-40	15.4529	4.80696	282.249					nucl 21, cyto_nucl 13.5, cyto 4
proteinId12972	1.12553	0.0629622	3.99487	4.5946e-14	2.86934	1.99576e-08	18.8696	4.32931	73.1194					plas 12, E.R. 6, mito 5, vacu 2
proteinId129754	-1.14316	0.00862434	-3.79024	1.06519e-19	-2.64708	4.2437e-10	92.6408	106.311	7.69494					mito 11, cyto 4, extr 3, cyto_nucl 3, pero 3, nucl 2, golg 2
proteinId129807	1.08291	0.165704	-0.660539	0.401349	-1.74345	0.0168511	6.4331	1.53337	0.985893					mito 19, cyto 4, nucl 3
proteinId129871	1.05344	0.0974241	-5.70942	9.493e-09	-6.76286	1.01308e-11	20.73	5.07512	0.0678861	KOG1187	Serine/threonine protein kinase	Signal transduction mechanisms	CELLULAR PROCESSES AND SIGNALING	nucl 22.5, cyto_nucl 14.5, cyto 3.5
proteinId130040	-0.00351327	0.994313	-0.669611	0.0342759	-0.666098	0.0376766	18.2162	9.32698	5.97077	KOG0274	Cdc4 and related F-box and WD-40 proteins	General function prediction only	POORLY CHARACTERIZED	nucl 18, cyto_nucl 12, cyto 4, mito 3	WD40,F-box-like,F-box
proteinId130083	-0.96874	0.16728	3.00312	8.37611e-08	3.97186	1.67625e-12	0.896258	0.915697	7.71378					nucl 19, cyto 6
proteinId130264	-0.362256	0.5075	-2.74406	2.46113e-09	-2.38181	2.98015e-07	16.2836	10.8512	1.62565	KOG0516	Dystonin, GAS (Growth-arrest-specific protein), and related proteins	Cytoskeleton	CELLULAR PROCESSES AND SIGNALING	nucl 19, cyto_nucl 12.5, mito 4, cyto 4	Uds1
proteinId130354	0.0276889	0.988823	4.14596	0.000729227	4.11827	0.000297195	0.309476	0.149258	3.36265					mito 10, nucl 8, cyto 4.5, cyto_pero 3.5, pero 1.5
proteinId130377	0.75759	0.524699	2.90877	0.00253998	2.15118	0.0248329	3.53061	1.05998	9.0552					plas 13, mito 7, E.R. 5
proteinId130389	2.28729	0.346586	4.92764	0.0167582	2.64035	0.168006	0.517284	0	2.47335					mito 12, cyto 6.5, extr 6, cyto_nucl 5
proteinId130529	1.10498	NA	-1.31678	0.594152	-2.42177	0.322829	0.502487	0.0799869	0					nucl 16, mito 6, cyto 4
proteinId130538	0.238688	0.710948	2.32177	1.93087e-06	2.08308	1.78443e-05	19.5639	8.45438	44.2259					nucl 24, cyto_nucl 13.5
proteinId130587	-1.12617	0.0101373	-3.29696	1.33046e-12	-2.17079	4.99405e-06	22.1732	24.9723	2.52196					mito 11, cyto 7.5, cyto_nucl 6, nucl 3.5, extr 3
proteinId130619	1.08252	NA	-1.41405	0.565101	-2.49657	0.305313	0.291565	0.0504623	0					extr 10, cyto 7.5, cyto_nucl 6.833, cyto_pero 5.166, nucl 4, mito 2, cysk 2
proteinId130633	-0.379629	0.589751	0.0792653	0.912698	0.458895	0.461802	5.5665	3.72756	3.99016	KOG1778	CREB binding protein/P300 and related TAZ Zn-finger proteins	Transcription	INFORMATION STORAGE AND PROCESSING	nucl 18, cyto_nucl 12, mito 5, cyto 4
proteinId130698	0.958243	0.391027	-0.223747	0.848909	-1.18199	0.244755	2.52623	0.649183	0.567231					nucl 20, cyto 6
proteinId130700	1.71218	0.00992022	1.8331	0.0032456	0.120923	0.863255	18.263	2.76962	10.3252					nucl 24.5, cyto_nucl 14.833
proteinId130794	1.99811	0.0922965	1.46281	0.19682	-0.535299	0.634262	5.83557	0.679589	2.04542					mito 23, nucl 3
proteinId131	-0.325557	0.771282	-2.4728	0.00533246	-2.14724	0.018004	2.90806	1.90232	0.329525	KOG0065	Pleiotropic drug resistance proteins (PDR1-15), ABC superfamily	Secondary metabolites biosynthesis, transport and catabolism	METABOLISM	plas 19, mito 3, E.R. 3	ABC2_membrane,ABC_tran,PDR_CDR,AAA_25,AAA_21,ABC2_membrane_3,AAA_22,DUF258,AAA_16
proteinId131085	5.54218	2.40472e-05	6.71961	7.47918e-08	1.17743	0.173536	9.98063	0.0550971	11.7785					mito 21, nucl 2, cyto 2, extr 2, cyto_nucl 2
proteinId131088	6.40815	6.02303e-05	2.60598	0.108075	-3.80217	0.00510578	8.89181	0.0238014	0.259055	KOG4177	Ankyrin	Cell wall/membrane/envelope biogenesis	CELLULAR PROCESSES AND SIGNALING	mito 13, cyto 7, nucl 6	Ank_2,Ank,Ank_3,Ank_4,Ank_5
proteinId131171	3.25615	7.73667e-07	-2.37111	0.000224255	-5.62726	6.66705e-19	1535.36	79.8098	15.0136	KOG0254	Predicted transporter (major facilitator superfamily)	General function prediction only	POORLY CHARACTERIZED	plas 20, E.R. 4, mito 3	Sugar_tr,MFS_1
proteinId131343	2.69792	0.0375999	5.68502	8.25208e-07	2.9871	0.00058939	3.04294	0.188906	13.9121					mito 21, cyto 3, extr 2, cyto_nucl 2
proteinId131420	3.16595	1.07392e-08	5.32512	6.25038e-24	2.15918	8.90495e-07	8.66837	0.466515	20.3493	KOG1039	Predicted E3 ubiquitin ligase	Posttranslational modification, protein turnover, chaperones	CELLULAR PROCESSES AND SIGNALING	nucl 20, mito 5	zf-RING_2,zf-C3HC4,zf-RING_5,zf-C3HC4_2,zf-C3HC4_3,zf-CCCH
proteinId131483	2.27809	0.000401293	6.0926	1.28085e-25	3.8145	1.55594e-20	6.06547	0.59881	45.4971					nucl 15.5, cyto_nucl 10.5, cyto 4.5, mito 4
proteinId131495	0.500157	0.551941	6.14353	1.46476e-22	5.64337	1.53866e-23	2.56826	0.91853	72.2135					nucl 15, cyto 7, mito 2, pero 1, golg 1, cysk 1
proteinId131510	-0.180864	0.87543	-1.45435	0.116503	-1.27348	0.179479	1.81636	1.05572	0.370738					plas 17, mito 5, nucl 4	Fungal_trans,Zn_clus
proteinId131616	1.34759	4.85613e-06	3.99241	2.08832e-47	2.64482	1.11709e-22	58.6504	11.7184	192.657	KOG3227	Calcium-responsive transcription coactivator	Transcription	INFORMATION STORAGE AND PROCESSING	nucl 6, mito 5, plas 4, extr 4, cyto_nucl 4, pero 3	RCR
proteinId131637	1.12907	0.015963	4.55777	5.38782e-29	3.4287	2.7782e-22	7.99468	1.85666	45.8167					nucl 16, mito 4, cyto 4, cyto_mito 4
proteinId131640	0.642654	0.188828	-0.482827	0.298554	-1.12548	0.0111981	22.5921	7.41771	5.38192					nucl 11, plas 9, cyto 4, pero 1, E.R. 1, vacu 1
proteinId131712	0.416126	0.321158	1.64091	3.19193e-06	1.22479	0.000626537	55.9178	21.3764	68.7918	KOG2997	F-box protein FBX9	General function prediction only	POORLY CHARACTERIZED	cyto 10.5, cyto_nucl 9, nucl 6.5, mito 6, pero 4
proteinId131760	2.81156	3.1656e-06	8.3864	6.36967e-51	5.57484	3.70386e-42	11.4312	0.791575	297.427					nucl 18.5, cyto_nucl 11.5, cyto 3.5, mito 2, pero 2
proteinId131787	-0.171202	0.687788	-1.20968	0.000269161	-1.03847	0.00213082	138.966	80.5631	35.452	KOG4157	beta-1,6-N-acetylglucosaminyltransferase, contains WSC domain	Carbohydrate transport and metabolism	METABOLISM	extr 16, plas 7, E.R. 2, vacu 2	GPI-anchored
proteinId131824	0.193312	0.746873	0.634078	0.187958	0.440766	0.371468	11.8485	5.27216	8.36935	KOG0075	GTP-binding ADP-ribosylation factor-like protein	General function prediction only	POORLY CHARACTERIZED	cysk 16, mito 5, cyto 2.5, cyto_pero 2.5, nucl 2	Arf,Ras,Miro,SRPRB,MMR_HSR1,Gtr1_RagA
proteinId131856	3.44377	0.00250175	5.12094	1.26061e-06	1.67717	0.0475056	5.69125	0.21875	10.0935					cyto 9, mito 6, extr 4, mito_nucl 4, nucl 2, plas 2, pero 2, E.R. 2
proteinId131887	-2.74118	1.02338e-14	-6.7556	1.28782e-75	-4.01442	4.19123e-27	101.094	351.84	3.22899	KOG1216	von Willebrand factor and related coagulation proteins	Extracellular structures	CELLULAR PROCESSES AND SIGNALING	extr 23, E.R. 2
proteinId131921	3.61875	0.000610421	3.63711	0.000311472	0.018356	0.984676	7.19889	0.249759	3.75707					extr 11, mito 5, cyto 5, cyto_mito 5
proteinId13199	0.796094	0.73509	3.55848	0.0489235	2.76238	0.106927	0.28197	0.0636497	1.39676					plas 11, mito 9, extr 2, E.R. 2, cyto_nucl 1, golg 1, cysk 1
proteinId132001	0.0941491	0.906703	1.5476	0.00939716	1.45345	0.0137621	6.90311	3.34371	10.1786					cyto_nucl 10.333, cyto 9.5, nucl 9, cyto_mito 7.166, mito 3.5, extr 3
proteinId132176	0.200749	0.700041	0.225987	0.610725	0.0252374	0.959571	86.5695	38.0656	45.6497					cyto 15, cyto_mito 10.333, cyto_nucl 8.333, extr 6, mito 4.5	DUF4066,DJ-1_PfpI
proteinId13220	-1.01801	0.0035959	-0.447066	0.191962	0.570945	0.0983383	62.2408	64.3269	48.0285	KOG2072	Translation initiation factor 3, subunit a (eIF-3a)	Translation, ribosomal structure and biogenesis	INFORMATION STORAGE AND PROCESSING	cyto_nucl 10, nucl 9, mito 7, cyto 7, plas 1, extr 1, pero 1, cysk 1	PCI
proteinId132471	6.07464	0.00160745	3.57969	0.058874	-2.49495	0.0847123	5.72023	0	0.443714					mito 19.5, cyto_mito 12.5, cyto 4.5
proteinId132764	1.25216	0.279174	8.81673	3.30145e-22	7.56458	5.10466e-30	0.902383	0.172984	99.1383					plas 19, mito 4, E.R. 3
proteinId13298	-0.176154	NA	2.07647	0.368964	2.25262	0.349295	0	0	0.18757					nucl 10, mito 10, mito_nucl 10
proteinId133174	-0.159364	0.869487	-4.96906	4.01868e-09	-4.8097	1.57771e-08	17.7086	10.0312	0.285788	KOG1146	Homeobox protein	General function prediction only	POORLY CHARACTERIZED	nucl 24, mito 1, cyto 1, pero 1, cyto_mito 1, cyto_pero 1
proteinId133265	0.48713	0.536108	1.5938	0.0133177	1.10667	0.0905138	7.01787	2.53244	8.04716					plas 18, mito 4, E.R. 3
proteinId133470	0.300886	0.584956	-1.7058	0.000220052	-2.00669	1.28595e-05	12.6664	5.2673	1.61647	KOG2166	Cullins	Cell cycle control, cell division, chromosome partitioning	METABOLISM	mito 16, nucl 9, cyto_nucl 6.5	Cullin,Cullin_Nedd8
proteinId133536	3.54642	2.81941e-05	3.41667	3.03871e-05	-0.129749	0.866413	4.98417	0.197283	2.3767	KOG1216	von Willebrand factor and related coagulation proteins	Extracellular structures	CELLULAR PROCESSES AND SIGNALING	mito 16.5, cyto_mito 10.5, nucl 6, cyto 3.5
proteinId133659	3.16439	0.141769	5.19281	0.00629726	2.02843	0.180598	0.886755	0	2.17492					plas 22, mito 3
proteinId133862	7.27944	1.07005e-20	7.69022	1.04302e-23	0.410783	0.627642	211.155	0.565143	142.886					cyto 10.5, cyto_nucl 10, nucl 8.5, extr 4, mito 2
proteinId133922	-1.63776	3.80698e-06	-3.4656	5.1444e-24	-1.82785	1.8908e-07	102.937	163.897	14.9628	KOG1944	Peroxisomal membrane protein MPV17 and related proteins	General function prediction only	POORLY CHARACTERIZED	extr 15, mito 5, plas 4, cyto 2	Mpv17_PMP22
proteinId133936	-0.043628	0.969646	2.68033	0.000456996	2.72396	0.000220349	1.82659	0.955628	6.60461					nucl 19, cyto_nucl 11.5, mito 6
proteinId134002	-0.998743	0.0250718	-3.75298	9.52687e-20	-2.75423	4.55656e-11	93.9861	97.8897	7.25854					nucl 16.5, cyto_nucl 11, cyto 4.5, mito 2, pero 2
proteinId134161	NA	NA	NA	NA	NA	NA	0	0	0					plas 12, E.R. 7, mito 6
proteinId13432	-2.24425	5.72917e-12	-2.46236	1.29e-14	-0.21812	0.551349	46.2434	113.743	20.8903	KOG0832	Mitochondrial/chloroplast ribosomal protein S2	Translation, ribosomal structure and biogenesis	INFORMATION STORAGE AND PROCESSING	mito 26	Ribosomal_S2
proteinId134325	0.249881	0.623469	-0.357611	0.424472	-0.607493	0.161547	4.85003	2.09619	1.66894	KOG0494	Transcription factor CHX10 and related HOX domain proteins	General function prediction only	POORLY CHARACTERIZED	nucl 17, mito 8	SR-25
proteinId134346	2.0674	NA	2.88551	0.210507	0.818116	0.73442	0.546095	0	0.642745					nucl 20, cyto_nucl 14.5, cyto 5
proteinId134510	0.743956	0.144524	-1.33793	0.00534373	-2.08189	9.32627e-06	14.9475	4.56784	1.82558	KOG4124	Putative transcriptional repressor regulating G2/M transition	Cell cycle control, cell division, chromosome partitioning	METABOLISM	nucl 21, cyto_nucl 13, cyto 3	zf-C2H2_4
proteinId134526	1.65832	0.000533131	2.73303	1.04378e-09	1.07471	0.0174487	21.4891	3.44319	23.945	KOG0504	FOG: Ankyrin repeat	General function prediction only	POORLY CHARACTERIZED	cyto 18, cyto_nucl 12, nucl 4, pero 4	Ank_2,Ank_4,Ank,Ank_5,Ank_3
proteinId134690	1.22371	0.439279	1.28324	0.365832	0.0595266	0.969571	1.17875	0.234852	0.634908					nucl 18, cyto_nucl 12.5, cyto 5, mito 4
proteinId134703	2.97125	0.000145486	6.38312	6.58159e-19	3.41187	2.68713e-15	11.0126	0.651213	62.5461					plas 14, mito 8, golg 2, vacu 2
proteinId134722	0.165843	0.672095	5.10465	2.13055e-69	4.93881	4.30029e-68	12.2381	5.59347	199.309					mito 12.5, nucl 9, cyto_mito 9, cyto 4.5	Complex1_LYR
proteinId134753	0.192745	0.676951	0.165547	0.681715	-0.0271982	0.950964	84.4368	37.686	43.1017					cyto_nucl 11.5, cyto 11, nucl 8, pero 4, mito 2, extr 2	MKT1_C
proteinId134812	-1.24029	0.00307123	0.479458	0.24177	1.71975	1.1832e-05	3.13785	3.80955	5.45632	KOG4197	FOG: PPR repeat	General function prediction only	POORLY CHARACTERIZED	mito 18.5, cyto_mito 11.5, cyto 3.5, nucl 3	PPR_2,PPR,PPR_3,PPR_1,TPR_19
proteinId134938	-0.264002	0.822061	-0.296559	0.769689	-0.032557	0.976434	4.73259	2.9057	2.42436	KOG2029	Uncharacterized conserved protein	Function unknown	POORLY CHARACTERIZED	cyto 9, cysk 6, nucl 5, pero 4, mito 2	DUF676
proteinId134958	1.47251	0.210856	4.16507	2.51064e-05	2.69256	0.000950473	0.987544	0.167101	3.5781					nucl 19, mito_nucl 12.833, cyto_nucl 10.833, mito 5.5
proteinId135060	-0.259398	0.617695	0.89918	0.0317422	1.15858	0.00518884	7.91285	4.8374	9.28675	KOG4157	beta-1,6-N-acetylglucosaminyltransferase, contains WSC domain	Carbohydrate transport and metabolism	METABOLISM	mito 17, nucl 4, cyto 3, extr 2
proteinId135273	1.55389	0.00875785	2.20911	5.74744e-05	0.655219	0.250061	5.80856	0.995026	4.83896					nucl 22, cyto 4
proteinId135518	-0.159014	0.757785	3.88601	3.22825e-24	4.04502	7.30986e-26	825.057	472.139	7245.18					mito 6, E.R. 6, plas 4, nucl 3, extr 3, golg 2, cyto 1, pero 1, vacu 1, cyto_pero 1
proteinId135682	0.299787	0.838263	1.45244	0.203457	1.15265	0.305591	1.1033	0.456653	1.36261					extr 10, cyto 7.5, cyto_nucl 7, nucl 5.5, mito 2
proteinId135684	-0.919411	0.0243862	-3.05627	1.50427e-15	-2.13686	4.07249e-08	25.0355	24.6318	2.97329	KOG0157	Cytochrome P450 CYP4/CYP19/CYP26 subfamilies	Secondary metabolites biosynthesis, transport and catabolism	METABOLISM	cyto 12, mito 9, cyto_nucl 8, pero 4	p450
proteinId135738	2.10749	0.0103768	0.331424	0.700931	-1.77607	0.0238926	30.9653	3.43949	4.41766					cyto 13, cyto_nucl 12.5, nucl 10, mito 1, plas 1, pero 1, E.R. 1
proteinId135884	2.01475	0.137416	1.26405	0.321582	-0.750699	0.573677	15.5649	1.84303	4.87205					mito 22, nucl 3
proteinId136326	5.89505	0.000428167	7.1271	6.37643e-06	1.23205	0.172764	4.33112	0	5.35507					nucl 14, cyto_nucl 12.5, cyto 9, extr 1, pero 1, golg 1, cysk 1
proteinId136415	4.21072	2.85832e-05	2.02569	0.0439952	-2.18502	0.0209179	12.0528	0.282514	1.2699					plas 18, E.R. 7
proteinId13658	0.779116	0.00932876	0.723129	0.0102658	-0.0559871	0.864387	78.1297	23.1861	39.1162	KOG1124	FOG: TPR repeat	General function prediction only	POORLY CHARACTERIZED	nucl 16, cyto_nucl 11.5, cyto 5, pero 3	TPR_1,TPR_2,TPR_11,TPR_8,TPR_16,TPR_12,TPR_14,TPR_17,TPR_7,TPR_19,TPR_6,TPR_9,Apc3,TPR_15
proteinId136851	-1.47124	0.0561682	-3.74851	2.63659e-05	-2.27728	0.014463	2.24038	3.26262	0.221566	KOG3627	Trypsin	Amino acid transport and metabolism	METABOLISM	nucl 17.5, cyto_nucl 11, mito 6
proteinId1369	-0.445509	0.330228	-1.33242	0.000702746	-0.886913	0.0291472	18.3366	12.7457	5.14969					nucl 14.5, cyto_nucl 12.5, cyto 7.5, pero 4	Nucleopor_Nup85
proteinId137149	0.370788	0.563371	-0.48602	0.386015	-0.856808	0.118722	10.8517	4.27199	3.07701	KOG0039	Ferric reductase, NADH/NADPH oxidase and related proteins	Secondary metabolites biosynthesis, transport and catabolism	METABOLISM	plas 21, E.R. 3, mito 2	FAD_binding_8,NAD_binding_6,Ferric_reduct
proteinId137242	2.82233	0.186285	5.60554	0.00238713	2.78321	0.0337953	0.891184	0	3.69643					mito 15, cyto_nucl 4, nucl 3.5, cyto 3.5, pero 2
proteinId137348	-0.0530588	0.951233	-4.90228	2.46134e-12	-4.84922	5.77941e-12	20.9955	11.1235	0.337236	KOG1216	von Willebrand factor and related coagulation proteins	Extracellular structures	CELLULAR PROCESSES AND SIGNALING	nucl 20, cyto 5
proteinId137608	-2.77571	2.90175e-17	-0.842462	0.0109904	1.93325	3.60984e-09	34.2037	120.636	68.7238					mito 17.5, cyto_mito 12.833, cyto 7, cyto_nucl 5.333	Ribonucleas_3_3
proteinId137701	0.388028	0.366602	-2.83729	4.01331e-15	-3.22532	5.37426e-19	135.487	52.484	7.41517	KOG0375	Serine-threonine phosphatase 2B, catalytic subunit	General function prediction only	POORLY CHARACTERIZED	cyto 12, nucl 10, pero 2, mito 1, golg 1, vacu 1	Metallophos
proteinId138100	-0.646861	0.170466	-5.97915	5.27393e-15	-5.33229	4.73419e-12	18.5655	14.9158	0.203818					nucl 19.5, cyto_nucl 12, cyto 3.5, mito 3
proteinId138733	-1.13419	0.280302	-4.76455	0.000396638	-3.63036	0.0086865	2.29302	2.64907	0.0589564					nucl 18.5, cyto_nucl 10.5, plas 3, cyto 1.5, mito 1, extr 1, E.R. 1, vacu 1
proteinId138740	-0.402411	0.678968	-1.19763	0.132368	-0.795221	0.341891	10.128	6.91173	3.03207					nucl 22.5, cyto_nucl 13.5, cyto 3.5
proteinId138748	1.23399	0.00591522	5.78931	4.1088e-48	4.55533	4.52086e-36	9.05736	1.96541	114.588					plas 19, mito 5, E.R. 2
proteinId138853	2.14158	0.035503	0.492194	0.647859	-1.64939	0.0831612	7.38016	0.783625	1.14783					plas 14, E.R. 6, mito 3, golg 3
proteinId138882	0.354724	0.234188	3.07634	4.50482e-35	2.72162	2.73542e-28	19.4497	7.78663	67.5097	KOG1840	Kinesin light chain	Cytoskeleton	CELLULAR PROCESSES AND SIGNALING	mito 8, cyto 7, mito_nucl 7, nucl 6, pero 6	TPR_10,TPR_12,TPR_11,AAA_16,TPR_2,NACHT,TPR_7,TPR_16,TPR_14
proteinId138885	-0.370486	0.650308	-5.65449	2.68727e-06	-5.284	1.41007e-05	8.34006	5.53282	0.064029					nucl 16, cyto_nucl 10.5, mito 8
proteinId138922	3.74459	0.0616264	5.48441	0.00239625	1.73982	0.169941	0.90623	0	1.70176					mito 16, cyto_nucl 5, nucl 4.5, cyto 4.5
proteinId139099	4.37294	0.0009638	5.93764	1.63691e-06	1.5647	0.0372752	3.38884	0.0483296	5.37969					extr 22, E.R. 3
proteinId139483	-0.918743	0.00248939	0.580242	0.0466651	1.49899	1.38078e-07	72.1599	70.3823	107.788					mito 21.5, cyto_mito 13.5, cyto 4.5	4HBT
proteinId139523	1.74265	0.0158792	1.73401	0.0111939	-0.00864249	0.990483	6.4431	0.954586	3.35506					mito 18, nucl 5, cyto_nucl 5, cyto 3
proteinId139524	-0.438642	0.25096	-1.1892	0.00044226	-0.750553	0.0317637	9.97155	6.92168	3.08289	KOG2047	mRNA splicing factor	RNA processing and modification	INFORMATION STORAGE AND PROCESSING	cyto 9, nucl 6, pero 5, cysk 5, cyto_mito 5	TPR_12,TPR_14,Suf,TPR_15,TPR_11,TPR_16
proteinId139533	3.08322	2.50299e-08	5.39588	9.63658e-25	2.31267	2.87418e-08	8.52895	0.492033	22.2699					cyto_nucl 12.5, cyto 12, nucl 9, pero 3
proteinId14015	-1.69712	6.46294e-09	-0.818663	0.00467582	0.878453	0.00282457	52.1521	86.8727	50.0814	KOG1284	Bifunctional GTP cyclohydrolase II/3,4-dihydroxy-2butanone-4-phosphate synthase	Coenzyme transport and metabolism	METABOLISM	cyto 10, cyto_nucl 9.5, nucl 7, cysk 7	DHBP_synthase
proteinId140322	0.87893	0.0354337	1.10337	0.0040353	0.224436	0.602182	269.389	75.7181	166.995	KOG1808	AAA ATPase containing von Willebrand factor type A (vWA) domain	General function prediction only	POORLY CHARACTERIZED	cyto_nucl 12.5, cyto 11.5, nucl 10.5, mito 3
proteinId140394	0.863159	0.0766547	0.439818	0.351659	-0.423341	0.374927	29.3034	8.27663	11.4572	KOG2346	Uncharacterized conserved protein	Function unknown	POORLY CHARACTERIZED	mito 20, nucl 4, cyto 2	Vps51
proteinId140395	1.15437	0.056493	4.84564	4.50539e-21	3.69127	1.29108e-17	8.1603	1.84552	56.4974					plas 11, mito 10, E.R. 5, cyto_mito 5, mito_nucl 5
proteinId140455	-0.146946	0.783703	-1.90656	5.72448e-06	-1.75961	3.28216e-05	6.55935	3.73828	1.00456	KOG1329	Phospholipase D1	Lipid transport and metabolism	METABOLISM	cyto 8, nucl 5, mito 4, plas 3, extr 2, E.R. 2, golg 2	PLDc,PLDc_2,PX
proteinId140532	-0.78051	0.0172021	-0.219802	0.503464	0.560708	0.0775277	25.1602	22.1106	19.3602	KOG1612	Exosomal 3'-5' exoribonuclease complex, subunit Rrp42	Translation, ribosomal structure and biogenesis	INFORMATION STORAGE AND PROCESSING	cyto 16, mito 10	RNase_PH
proteinId140590	-1.63092	0.00257008	0.250085	0.655202	1.88101	0.000244681	10.3794	16.6477	20.1651	KOG3164	Uncharacterized proteins of PilT N-term./Vapc superfamily	General function prediction only	POORLY CHARACTERIZED	mito 14, nucl 10, cyto 3	Fcf1
proteinId140670	-0.627836	0.0546362	0.925843	0.00174261	1.55368	1.19645e-07	65.9548	52.5546	102.316	KOG2922	Uncharacterized conserved protein	Function unknown	POORLY CHARACTERIZED	plas 21, mito 2, E.R. 2	Mg_trans_NIPA,EmrE
proteinId140675	-0.190902	0.567603	1.59215	1.44094e-09	1.78305	1.00001e-11	29.52	17.2347	53.2527	KOG2444	WD40 repeat protein	General function prediction only	POORLY CHARACTERIZED	extr 10, cyto 8.5, cyto_nucl 7.5, nucl 5.5
proteinId140981	-1.29387	0.000670982	0.213923	0.586627	1.50779	3.14699e-05	16.7409	21.1045	25.0725	KOG1234	ABC (ATP binding cassette) 1 protein	General function prediction only	POORLY CHARACTERIZED	cyto 7.5, cyto_nucl 7.5, nucl 6.5, mito 6, cysk 4	ABC1
proteinId141034	0.05797	0.88666	3.17316	1.50801e-27	3.11519	6.17374e-27	35.7268	17.6718	164.309					nucl 11.5, mito_nucl 11, mito 9.5, cyto 3
proteinId141227	0.509108	0.224417	0.766429	0.0401037	0.257321	0.51753	21.4669	7.74104	13.4861	KOG1216	von Willebrand factor and related coagulation proteins	Extracellular structures	CELLULAR PROCESSES AND SIGNALING	nucl 21, cyto_nucl 14, mito 3, cyto 3
proteinId141265	-0.611453	0.0628027	1.4726	4.40389e-07	2.08406	7.70276e-13	43.6069	34.3601	97.8992					mito 16, cyto 6.5, cyto_nucl 4, pero 2	DUF4336
proteinId141331	-2.12289	2.46703e-05	-4.41048	1.7671e-20	-2.28759	2.59e-06	471.134	1090.69	50.5149	KOG1196	Predicted NAD-dependent oxidoreductase	General function prediction only	POORLY CHARACTERIZED	cyto 23.5, cyto_nucl 12.5	ADH_zinc_N,ADH_zinc_N_2
proteinId14168	8.56111	4.21988e-21	12.4741	7.6505e-45	3.913	8.34486e-17	63.0356	0.0531874	502.937					extr 18, E.R. 5, golg 2	Glyco_hydro_16
proteinId141877	-0.328774	0.427082	2.8054	4.20239e-17	3.13417	5.26975e-21	32.0253	20.7649	149.722	KOG4774	Uncharacterized conserved protein	Function unknown	POORLY CHARACTERIZED	cyto 15, cyto_nucl 13.333, cyto_mito 9.499, nucl 8.5	Yae1_N
proteinId141904	1.41575	0.0205151	4.94004	3.68178e-20	3.52429	1.58716e-13	8.93747	1.67592	55.6796					plas 16, mito 6, extr 2, E.R. 2
proteinId14201	0.690351	0.042324	0.702317	0.0260105	0.0119656	0.975353	77.0755	24.2318	40.3919	KOG2834	Nuclear pore complex, rNpl4 component (sc Npl4)	Intracellular trafficking, secretion, and vesicular transport	CELLULAR PROCESSES AND SIGNALING	cyto 14.5, cyto_pero 9.5, mito 5, nucl 4	NPL4,zf-NPL4
proteinId14231	0.755495	0.165853	-0.408779	0.446051	-1.16427	0.0201053	19.4572	5.8151	4.45131	KOG2857	Predicted MYND Zn-finger protein/hormone receptor interactor	Transcription	INFORMATION STORAGE AND PROCESSING	nucl 21, cyto_nucl 12.5, mito 4	zf-HIT
proteinId142359	-2.20158	2.17759e-14	0.610435	0.0361105	2.81202	1.91864e-23	57.7106	137.355	214.596	KOG1569	50S ribosomal protein L1	Translation, ribosomal structure and biogenesis	INFORMATION STORAGE AND PROCESSING	mito 22, cyto_mito 14.5, cyto 5	Ribosomal_L1
proteinId14238	-0.335163	0.847461	1.20192	0.384471	1.53709	0.263634	0.980558	0.64508	1.66226					nucl 9, mito 8, pero 3, plas 2, extr 2, golg 2
proteinId14246	0.790983	0.110853	4.60812	1.63926e-28	3.81714	7.47668e-24	10.155	2.9871	76.6875					nucl 8, extr 6, pero 5, mito 3, cyto 2, E.R. 2
proteinId142534	0.6596	0.111948	1.5517	2.33031e-05	0.892099	0.0185109	46.7685	15.0016	45.1009	KOG1142	Transcription initiation factor TFIID, subunit TAF12 (also component of histone acetyltransferase SAGA)	Transcription	INFORMATION STORAGE AND PROCESSING	nucl 15, cyto_nucl 10.833, mito 6.5, cyto_mito 6.166, cyto 4.5	TFIID_20kDa
proteinId142637	3.9305	0.00102571	2.23105	0.0632527	-1.69945	0.0869764	2.39743	0.0668303	0.376917	KOG4701	Chitinase	Cell wall/membrane/envelope biogenesis	CELLULAR PROCESSES AND SIGNALING	nucl 18.5, cyto_nucl 11, mito 6
proteinId142663	-0.387434	0.267735	3.66819	2.81616e-37	4.05562	1.36998e-45	23.682	15.9661	209.263	KOG0725	Reductases with broad range of substrate specificities	General function prediction only	POORLY CHARACTERIZED	cyto 15, cysk 10	adh_short,adh_short_C2,KR
proteinId142866	-0.428722	0.404584	1.02859	0.016606	1.45731	0.000553007	2.5061	1.73019	3.62472	KOG4415	Uncharacterized conserved protein	Function unknown	POORLY CHARACTERIZED	nucl 22.5, cyto_nucl 13.5, cyto 3.5
proteinId142914	0.00905181	0.986079	1.63593	1.35646e-06	1.62688	1.32009e-06	12.2099	6.17994	19.7396	KOG0503	Asparaginase	Amino acid transport and metabolism	METABOLISM	cyto 10.5, cyto_nucl 9, mito 7, nucl 6.5	Asparaginase,Ank,Ank_2,Ank_4,Ank_5,Ank_3
proteinId143412	1.19375	0.000679942	-0.979892	0.00454123	-2.17364	9.75297e-11	103.349	22.8957	11.8292	KOG1657	CCAAT-binding factor, subunit C (HAP5)	Transcription	INFORMATION STORAGE AND PROCESSING	nucl 21.5, cyto_nucl 15.5, cyto 4.5	CBFD_NFYB_HMF,Histone
proteinId143413	2.28978	1.86006e-11	3.52473	7.78178e-27	1.23494	5.84613e-05	73.4415	7.61113	90.8384					plas 14, mito 7, E.R. 3, extr 1, golg 1, vacu 1
proteinId143807	2.05268	0.00477469	4.45477	1.23982e-11	2.40209	8.5992e-06	2.30937	0.272881	6.48962	KOG1216	von Willebrand factor and related coagulation proteins	Extracellular structures	CELLULAR PROCESSES AND SIGNALING	nucl 21, cyto_nucl 15, cyto 5
proteinId144072	0.158484	0.684357	1.28756	1.80266e-05	1.12908	0.00019823	101.461	46.7009	116.735	KOG1655	Protein involved in vacuolar protein sorting	Intracellular trafficking, secretion, and vesicular transport	CELLULAR PROCESSES AND SIGNALING	nucl 16, cyto 6.5, cyto_pero 4.5, mito 2	Snf7
proteinId144278	1.57576	7.2841e-06	1.14833	0.000820778	-0.427435	0.235096	31.7888	5.4522	12.3892	KOG1386	Nucleoside phosphatase	Nucleotide transport and metabolism	METABOLISM	plas 7, mito 6, extr 5, nucl 2, cyto 2, cyto_nucl 2, pero 2, E.R. 2, cyto_pero 2	GDA1_CD39
proteinId144279	2.1862	0.000370192	6.62602	5.88839e-33	4.43983	1.01838e-27	10.8343	1.15827	126.839					plas 10, E.R. 6, mito 5, extr 4
proteinId144884	-0.399907	0.356689	-1.00715	0.00798114	-0.607244	0.12443	50.8827	34.6519	17.507					mito 14, plas 4, E.R. 3, nucl 2, extr 2
proteinId144914	-0.775324	0.085205	-2.93666	6.1391e-11	-2.16133	2.11704e-06	14.1028	12.4383	1.61492	KOG3044	Uncharacterized conserved protein	Function unknown	POORLY CHARACTERIZED	mito_nucl 10.166, nucl 10, mito 10, cyto_nucl 9	DUF2052
proteinId144915	0.588872	0.527604	2.98569	5.82692e-05	2.39682	0.000926105	4.15127	1.37898	11.7229					nucl 10, mito 9, cyto_nucl 8, cyto 4, plas 2
proteinId145506	-1.22788	5.09548e-05	0.699209	0.017785	1.92709	2.34747e-11	89.0641	107.481	178.646	KOG0289	mRNA splicing factor	General function prediction only	POORLY CHARACTERIZED	extr 11, cyto 10, cyto_nucl 7.333, cyto_mito 6.833, nucl 3.5	Prp19,WD40
proteinId145776	1.29203	0.00937635	-0.508775	0.311925	-1.80081	0.000126524	50.8789	10.6613	7.64973	KOG0028	Ca2+-binding protein (centrin/caltractin), EF-Hand superfamily protein	Cytoskeleton	CELLULAR PROCESSES AND SIGNALING	nucl 19, cyto 4, mito 3	EF-hand_7
proteinId145810	5.31053	4.87659e-23	5.1654	1.86485e-22	-0.145135	0.773139	32.5478	0.391068	15.1788					plas 22, E.R. 3
proteinId145856	0.323798	0.431664	1.77214	1.43305e-07	1.44834	1.85169e-05	30.5329	12.451	43.678	KOG2069	Golgi transport complex subunit	Intracellular trafficking, secretion, and vesicular transport	CELLULAR PROCESSES AND SIGNALING	nucl 13.5, cyto_nucl 13, cyto 11.5	Dor1
proteinId145943	1.51108	0.0466004	2.86136	2.59002e-05	1.35029	0.0276546	3.7541	0.65813	5.11783					mito 12, nucl 8, cyto 6
proteinId145956	-1.44525	0.00792999	-0.221995	0.694716	1.22326	0.019505	12.1553	17.0723	14.8276	KOG1685	Uncharacterized conserved protein	Function unknown	POORLY CHARACTERIZED	nucl 16, cyto 6, mito 5
proteinId146068	6.01457	4.04997e-23	10.217	1.14764e-66	4.20242	2.8835e-20	99.8204	0.699112	975.229					extr 22, E.R. 2, golg 2
proteinId146244	0.642539	0.535108	-5.57254	0.000670833	-6.21508	0.000154276	8.69529	2.81408	0					extr 15, mito 9, cyto 2
proteinId146261	6.58908	2.71138e-05	7.93793	1.08882e-07	1.34885	0.0580458	4.10395	0	5.5968	KOG1216	von Willebrand factor and related coagulation proteins	Extracellular structures	CELLULAR PROCESSES AND SIGNALING	extr 13, mito 4, plas 3, E.R. 3, golg 3
proteinId146838	-0.474199	0.591427	-0.568418	0.456231	-0.0942191	0.911316	135.422	100.486	68.4104	KOG4186	Peroxisomal biogenesis protein (peroxin)	Intracellular trafficking, secretion, and vesicular transport	CELLULAR PROCESSES AND SIGNALING	cyto 12, mito 8, cyto_nucl 8	PEX11
proteinId146861	0.0504562	0.936531	0.0612218	0.920422	0.0107656	0.984676	10.8466	5.39994	5.75208					plas 7, cyto 6, extr 5, cyto_mito 5, mito 4, cyto_pero 4
proteinId147183	-1.86581	2.7885e-06	3.91427	2.56079e-25	5.78008	3.4475e-53	263.869	500.87	7846.67					plas 17, E.R. 5, mito 2, pero 2
proteinId147596	-0.970204	0.0152185	-2.3232	4.15905e-10	-1.35299	0.000397237	54.9951	55.8199	11.301	KOG3076	5'-phosphoribosylglycinamide formyltransferase	Carbohydrate transport and metabolism	METABOLISM	cyto 12.5, mito 7, cyto_nucl 7, extr 4	Formyl_trans_N
proteinId147599	1.66477	0.16958	3.49817	0.000886634	1.8334	0.0544702	2.45668	0.370288	4.9244					nucl 14, mito 4, cyto 3, plas 2, cyto_pero 2
proteinId147883	0.100986	0.857108	1.35991	0.00115939	1.25892	0.0029137	21.6333	10.465	27.6819	KOG1874	KEKE-like motif-containing transcription regulator (Rlr1)/suppressor of sin4	Transcription	INFORMATION STORAGE AND PROCESSING	nucl 12, mito 8.5, cyto_mito 7.5, cyto 5.5	G-patch_2
proteinId147889	0.570131	0.0969164	0.608303	0.0540006	0.038172	0.917181	56.9161	19.5648	30.4963	KOG1604	Predicted mutarotase	Carbohydrate transport and metabolism	METABOLISM	mito 17, cyto_mito 12.833, cyto 6.5, cyto_nucl 5.166	Aldose_epim
proteinId147918	-1.44125	2.17882e-05	-0.88145	0.00770347	0.559796	0.105823	59.4816	83.6715	46.2442	KOG4777	Aspartate-semialdehyde dehydrogenase	Amino acid transport and metabolism	METABOLISM	mito 19, cyto 4, extr 2, cyto_nucl 2, pero 2	Semialdhyde_dhC,Semialdhyde_dh
proteinId148106	0.416473	0.466008	-0.934056	0.0572835	-1.35053	0.00551386	17.2358	6.55169	3.49547					nucl 7.5, cyto_nucl 7.5, mito 7, cyto 6.5, plas 2, pero 2	RRN7
proteinId148157	1.04307	0.0282156	2.26601	1.35365e-07	1.22294	0.00549456	15.35	3.74983	18.7056	KOG1192	UDP-glucuronosyl and UDP-glucosyl transferase	Carbohydrate transport and metabolism	METABOLISM	nucl 14.5, cyto_nucl 11, cyto 6.5, mito 3, pero 3	Glyco_transf_28,GRAM,PH
proteinId148404	-0.557726	0.205082	3.14077	2.15624e-17	3.6985	1.47126e-23	15.0312	11.3657	104.145					cyto 12.5, cyto_nucl 11.833, nucl 9, cyto_pero 7.166, mito 4
proteinId148482	0.468824	0.42378	-1.49383	0.00252738	-1.96265	7.15774e-05	81.8529	30.7659	11.0211					plas 17, mito 3, E.R. 3, golg 2	Gly_transf_sug
proteinId148483	0.580602	0.396749	5.48798	4.23325e-23	4.90738	5.44692e-19	38.0573	13.235	642.27					mito 17, cyto 4, nucl 2, cyto_pero 2
proteinId148571	-0.459884	0.558565	-4.54911	3.43856e-07	-4.08923	5.73938e-06	5.63453	3.99991	0.152075					extr 15, plas 5, mito 4, cyto 1, pero 1, E.R. 1, cyto_pero 1
proteinId148588	0.399226	0.273293	0.0498103	0.899341	-0.349416	0.303102	38.2183	14.8782	15.7398	KOG2837	Protein containing a U1-type Zn-finger and implicated in RNA splicing or processing	RNA processing and modification	INFORMATION STORAGE AND PROCESSING	nucl 23, cyto 2	Kin17_mid
proteinId148593	-1.60408	0.0030194	-6.81068	2.85943e-17	-5.20659	1.93175e-10	28.9911	46.3971	0.350031	KOG4148	Uncharacterized conserved protein	Function unknown	POORLY CHARACTERIZED	nucl 10.5, mito 10, cyto_nucl 7, cyto 2.5, extr 2, cysk 2	Cmc1
proteinId14869	-0.784322	0.0574914	0.478425	0.218198	1.26275	0.00075519	8.08541	7.18577	10.2636	KOG2858	Uncharacterized conserved protein	General function prediction only	POORLY CHARACTERIZED	mito 11, cyto 9, cyto_nucl 9, nucl 7
proteinId148742	-0.792649	0.027456	-1.24874	0.00024436	-0.456092	0.211638	7.44154	6.6224	2.83331	KOG1224	Para-aminobenzoate (PABA) synthase ABZ1	Translation, ribosomal structure and biogenesis	INFORMATION STORAGE AND PROCESSING	cyto 17.5, cyto_nucl 12, nucl 5.5, pero 3	Chorismate_bind,GATase,Anth_synt_I_N
proteinId148951	-0.642828	0.0636758	-0.151609	0.66341	0.491219	0.138774	33.253	26.7636	24.5643	KOG0366	Protein geranylgeranyltransferase type II, beta subunit	Posttranslational modification, protein turnover, chaperones	CELLULAR PROCESSES AND SIGNALING	cyto 16.5, cyto_nucl 10.333, cyto_pero 9.666, extr 4, mito 3	Prenyltrans,Prenyltrans_2,Prenyltrans_1
proteinId149063	-0.330706	0.366178	-2.26205	2.14627e-12	-1.93134	2.57916e-09	31.1776	20.1015	4.24586	KOG2980	Integral membrane protease of the rhomboid family involved in different forms of regulated intramembrane proteolysis	Signal transduction mechanisms	CELLULAR PROCESSES AND SIGNALING	plas 15, mito 7, E.R. 3	Rhomboid
proteinId149117	-0.878544	0.0383669	-2.119	8.72662e-08	-1.24046	0.00236056	47.1664	44.7514	10.3469	KOG4146	Ubiquitin-like protein	Posttranslational modification, protein turnover, chaperones	CELLULAR PROCESSES AND SIGNALING	cyto 14, cyto_nucl 9.5, mito 8, nucl 3	Urm1
proteinId149616	-0.683023	0.078394	-1.60477	4.49149e-06	-0.921743	0.0109407	73.1542	60.8432	20.3126	KOG0813	Glyoxylase	General function prediction only	POORLY CHARACTERIZED	mito 21.5, mito_nucl 13, nucl 3.5	Lactamase_B
proteinId149965	0.197651	0.767553	4.83633	2.23441e-24	4.63868	3.35657e-25	7.51635	3.31946	100.105					mito 14, nucl 9.5, cyto_nucl 6.5, cyto 2.5
proteinId15000	0.0469129	0.926262	1.18369	0.00122801	1.13678	0.00185021	18.1279	8.99964	20.9568	KOG4727	U1-like Zn-finger protein	General function prediction only	POORLY CHARACTERIZED	nucl 15, cyto_nucl 12, cyto 7, pero 4	zf-C2H2_jaz,zf-met
proteinId15016	0.725745	0.251274	1.10411	0.0492737	0.378366	0.518355	5.64525	1.75139	3.89831	KOG4297	C-type lectin	Signal transduction mechanisms	CELLULAR PROCESSES AND SIGNALING	nucl 17.5, mito_nucl 13.5, mito 8.5	DUF4078
proteinId15021	0.999836	0.0229479	2.10245	1.27712e-07	1.10261	0.00485123	15.0184	3.83544	17.0535	KOG0562	Predicted hydrolase (HIT family)	General function prediction only	POORLY CHARACTERIZED	mito 18.5, mito_nucl 13.333, nucl 7, cyto_nucl 4.833	DcpS_C,HIT
proteinId150223	-1.51687	0.00101454	-0.342995	0.466782	1.17387	0.00893671	10.2482	14.9458	12.0095					nucl 12.5, cyto_nucl 9.5, mito 7, cyto 5.5	Utp8
proteinId15035	-1.48525	3.6409e-06	1.73784	1.3035e-08	3.22309	3.60349e-26	117.639	170.48	583.477	KOG3472	Predicted small membrane protein	Function unknown	POORLY CHARACTERIZED	extr 10, plas 9, mito 4, E.R. 2, vacu 2, cyto_mito 2, mito_nucl 2	DUF423
proteinId150498	-0.630653	0.476719	-3.51947	0.000251917	-2.88882	0.00316237	4.42328	3.56066	0.275531					cyto 10, nucl 9, mito 4, plas 1, extr 1, pero 1, cysk 1
proteinId150560	3.04202	2.07749e-05	5.96246	3.5173e-19	2.92044	1.85068e-09	6.05007	0.357815	24.635					nucl 19.5, cyto_nucl 13, cyto 5.5
proteinId150619	-1.03754	0.00555843	-1.21634	0.000497872	-0.178802	0.651714	828.719	885.271	387.173					plas 17, E.R. 5, extr 4
proteinId151413	-2.61152	3.31762e-22	-1.37405	3.00674e-07	1.23747	5.34622e-06	1272.24	3994.11	1571.18	KOG0003	Ubiquitin/60s ribosomal protein L40 fusion	Translation, ribosomal structure and biogenesis	INFORMATION STORAGE AND PROCESSING	cyto_nucl 14.5, nucl 10.5, cyto 9.5, mito 6	ubiquitin,Rad60-SLD,Ribosomal_L40e,Ubiquitin_2
proteinId151684	1.74487	2.73494e-06	0.288972	0.471015	-1.4559	5.32192e-05	14.185	2.14165	2.67644	KOG2051	Nonsense-mediated mRNA decay 2 protein	RNA processing and modification	INFORMATION STORAGE AND PROCESSING	plas 16, nucl 7.5, cyto_nucl 5.5, cyto 2.5
proteinId151745	-0.167261	0.736087	0.909213	0.0188442	1.07647	0.00571548	64.002	36.9269	71.356	KOG1597	Transcription initiation factor TFIIB	Transcription	INFORMATION STORAGE AND PROCESSING	cyto 12.5, cyto_nucl 11.5, nucl 7.5, pero 7	TFIIB,TF_Zn_Ribbon
proteinId15185	0.121604	0.763262	-2.01991	9.2487e-11	-2.14151	7.22387e-12	233.672	110.369	27.6285					plas 21, E.R. 4	ATP_synt_H
proteinId152079	5.76754	2.30155e-14	9.47819	1.92106e-38	3.71065	1.70991e-15	9.31066	0.0719535	64.4709	KOG2571	Chitin synthase/hyaluronan synthase (glycosyltransferases)	Cell wall/membrane/envelope biogenesis	CELLULAR PROCESSES AND SIGNALING	plas 21, E.R. 3, vacu 3	Chitin_synth_2,Glyco_trans_2_3,Glyco_tranf_2_3
proteinId152090	-0.667824	0.0895816	1.02065	0.00351544	1.68847	1.00257e-06	11.1996	9.17463	19.1047					mito 10, nucl 8, cyto 7
proteinId152190	0.928367	0.0518002	4.23506	2.84355e-25	3.30669	5.86365e-20	18.0695	4.81975	95.1762					nucl 15, mito 9, cyto 2
proteinId152236	-0.28848	0.648726	0.00181943	0.998233	0.2903	0.606912	6.40044	3.99445	4.10919	KOG3020	TatD-related DNase	Replication, recombination and repair	INFORMATION STORAGE AND PROCESSING	mito 22.5, cyto_mito 13, cyto 2.5	TatD_DNase
proteinId15225	1.41533	0.00288137	0.2723	0.584931	-1.14303	0.0122105	6.97732	1.31937	1.62994	KOG3592	Microtubule-associated proteins	Cytoskeleton	CELLULAR PROCESSES AND SIGNALING	nucl 22.5, cyto_nucl 14, cyto 4.5	Mcp5_PH
proteinId152253	1.23156	0.136381	-1.13012	0.141522	-2.36168	0.00161725	36.0769	7.69902	3.5553					plas 16, mito 4, E.R. 4, vacu 3	DUF3429
proteinId152463	-1.11885	0.511963	3.04072	0.0199292	4.15956	0.00167463	0.239068	0.301707	3.005					mito 15, cyto 6.5, cyto_nucl 4.5, plas 2, nucl 1.5
proteinId152668	0.240202	0.729632	-4.38358	1.63876e-07	-4.62378	3.21342e-08	6.57763	2.85408	0.120166	KOG0834	CDK9 kinase-activating protein cyclin T	Cell cycle control, cell division, chromosome partitioning	METABOLISM	nucl 16, cyto_nucl 12, cyto 6, mito 3	Cyclin_N,Cyclin_C
proteinId152706	-1.55578	0.0066991	-0.0272552	0.977814	1.52852	0.00517079	33.865	52.5581	53.0019	KOG3042	Panthothenate synthetase	Coenzyme transport and metabolism	METABOLISM	mito 24, cyto 2	Pantoate_ligase
proteinId152777	-0.793498	0.0551068	-0.528957	0.175672	0.264542	0.526127	187.341	167.811	118.115	KOG3501	Molecular chaperone Prefoldin, subunit 1	Posttranslational modification, protein turnover, chaperones	CELLULAR PROCESSES AND SIGNALING	nucl 14, cyto_nucl 12.333, cyto 9.5, mito_nucl 8.833	Prefoldin_2
proteinId153577	1.06103	0.121119	3.27797	2.44066e-08	2.21694	3.74012e-05	4.19163	1.00005	10.3634	KOG2488	Acetyltransferase (GNAT) domain-containing protein	General function prediction only	POORLY CHARACTERIZED	nucl 13.5, cyto_nucl 13.5, cyto 10.5	Acetyltransf_1,Acetyltransf_7,FR47
proteinId153629	3.4124	0.0140447	2.94142	0.0265014	-0.47098	0.694151	2.08293	0.0771241	0.764106					extr 8, cyto 4.5, pero 4, cyto_mito 3.5, nucl 2, plas 2, E.R. 2, golg 2
proteinId154193	0.304922	0.623825	-0.582483	0.273596	-0.887406	0.0902706	21.7734	8.93911	6.03262	KOG4551	GPI-GlcNAc transferase complex, PIG-H component, involved in glycosylphosphatidylinositol anchor biosynthesis	Posttranslational modification, protein turnover, chaperones	CELLULAR PROCESSES AND SIGNALING	mito 8, plas 5, cyto 4, nucl 3, extr 3, pero 3	PIG-H
proteinId154711	1.02648	0.00641054	2.37239	4.8444e-12	1.34591	6.03079e-05	18.3875	4.58812	24.4593	KOG0794	CDK8 kinase-activating protein cyclin C	Transcription	INFORMATION STORAGE AND PROCESSING	mito 14, nucl 6, cyto 3, plas 2, pero 2	Cyclin_N
proteinId154808	0.953822	0.583388	7.07991	2.76793e-08	6.12609	4.99606e-11	0.508066	0.102249	21.7879					plas 21, mito 3, E.R. 1, golg 1, vacu 1
proteinId15517	-0.252464	0.630881	-6.26523	2.66144e-20	-6.01277	1.28158e-18	30.2788	18.5864	0.21036	KOG4157	beta-1,6-N-acetylglucosaminyltransferase, contains WSC domain	Carbohydrate transport and metabolism	METABOLISM	extr 26
proteinId155295	0.273049	0.50789	1.3273	7.45031e-05	1.05426	0.00162416	21.7859	9.2434	23.8359	KOG2959	Transcriptional regulator	Transcription	INFORMATION STORAGE AND PROCESSING	nucl 19.5, cyto_nucl 13, cyto 5.5	HCNGP
proteinId155407	-1.3155	0.000691237	-0.957662	0.0101455	0.357838	0.3772	82.4323	105.761	55.517					plas 22, E.R. 3	SHR3_chaperone
proteinId155669	1.67234	0.00016246	3.10762	6.12475e-14	1.43528	0.00023419	18.7032	2.98994	26.8344	KOG3138	Predicted N-acetyltransferase	General function prediction only	POORLY CHARACTERIZED	mito 14, cyto_nucl 6.333, cyto 6, nucl 5.5, cyto_pero 3.833	Acetyltransf_1,Acetyltransf_10
proteinId156032	-0.0343834	0.925802	2.57304	1.63597e-23	2.60742	1.73747e-24	27.9603	14.6673	89.6648					cysk 9, mito 7, cyto 7, cyto_nucl 5.333, cyto_pero 4.333
proteinId156071	0.551965	0.588407	-1.68001	0.0798977	-2.23198	0.0171205	5.9177	2.06125	0.621996					nucl 12, cyto_nucl 12, cyto 10, mito 4
proteinId156296	-1.57113	0.005704	-0.0999027	0.87399	1.47122	0.00684039	3.72958	5.77558	5.5267	KOG2972	Uncharacterized conserved protein	Function unknown	POORLY CHARACTERIZED	cyto 11.5, mito 9, cyto_nucl 9, nucl 5.5	Transcrip_reg
proteinId156303	-1.74993	0.0100726	-5.08312	8.93609e-09	-3.33319	0.000252105	5.69846	9.99348	0.262077					mito 23, nucl 3
proteinId156438	-1.83373	9.57619e-06	-3.51118	5.86327e-17	-1.67745	0.000111632	17.9599	32.8096	2.86646	KOG1874	KEKE-like motif-containing transcription regulator (Rlr1)/suppressor of sin4	Transcription	INFORMATION STORAGE AND PROCESSING	nucl 23.5, cyto_nucl 13.5
proteinId156463	1.02967	0.309267	1.1236	0.220934	0.0939284	0.923256	2.38246	0.583068	1.34834					nucl 14.5, cyto_nucl 11.5, cyto 7.5, mito 3
proteinId156682	-0.0387428	0.929926	-0.488169	0.143267	-0.449426	0.188166	51.8873	27.3214	19.8283	KOG1279	Chromatin remodeling factor subunit and related transcription factors	Chromatin structure and dynamics	INFORMATION STORAGE AND PROCESSING	cyto_nucl 7, nucl 6, mito 6, cyto 6, pero 2, cysk 2, vacu 2	WW
proteinId156977	1.86344	0.173034	2.53403	0.0389168	0.670591	0.572245	1.84207	0.227174	1.59874					mito 9, nucl 8.5, cyto_nucl 7.833, cyto 6, cyto_pero 4.333
proteinId156978	1.06393	0.42057	3.72944	0.000455433	2.66552	0.00416571	1.62591	0.36809	5.77471					extr 8, plas 7, mito 6, E.R. 4
proteinId15704	0.0796514	0.842464	-1.00265	0.00108533	-1.08231	0.0004296	22.1587	10.7104	5.43196	KOG0479	DNA replication licensing factor, MCM3 component	Replication, recombination and repair	INFORMATION STORAGE AND PROCESSING	nucl 21.5, cyto_nucl 13, cyto 3.5	MCM,MCM_N,Mg_chelatase
proteinId157072	-0.26075	0.835105	5.62815	1.3419e-12	5.8889	9.25198e-17	0.643688	0.387277	21.8717					mito 12, cyto 5, plas 5, extr 3
proteinId157154	2.7242	0.229975	4.59866	0.0199803	1.87447	0.248541	0.509444	0	1.15851					mito 14, cyto 7.5, cyto_nucl 4.5, extr 4
proteinId157158	0.908822	0.0615293	-0.247557	0.617154	-1.15638	0.0106686	15.0962	4.08447	3.51805	KOG2510	SWI-SNF chromatin-remodeling complex protein	Chromatin structure and dynamics	INFORMATION STORAGE AND PROCESSING	nucl 14.5, cyto_nucl 9.5, mito 6, cyto 3.5
proteinId157831	-0.434195	0.213091	-4.353	2.07892e-36	-3.9188	1.49049e-29	16.4603	11.4039	0.557348	KOG4568	Cytoskeleton-associated protein and related proteins	General function prediction only	POORLY CHARACTERIZED	nucl 19.5, cyto_nucl 13.333, mito_nucl 10.666, cyto 5
proteinId158109	-0.192208	0.834934	-0.748865	0.322778	-0.556656	0.476892	4.26329	2.48277	1.4766					nucl 14.5, mito 10, cyto_nucl 8.5
proteinId158281	0.606809	0.155969	1.17952	0.00186968	0.572711	0.139975	17.4926	5.86518	13.6558	KOG1187	Serine/threonine protein kinase	Signal transduction mechanisms	CELLULAR PROCESSES AND SIGNALING	mito 13, nucl 6, cyto 6, cyto_nucl 6
proteinId158282	1.42272	0.00284576	1.6213	0.000327317	0.198586	0.682572	19.2406	3.66518	11.6669					mito 16, nucl 8, cyto 3
proteinId158343	5.54222	8.95645e-05	3.16602	0.0252945	-2.3762	0.01953	3.19264	0.0208784	0.292629					nucl 16.5, cyto_nucl 11.5, cyto 5.5, pero 4
proteinId158349	3.53306	0.00232645	6.84058	1.23781e-10	3.30753	3.19193e-06	3.21174	0.100138	17.3321	KOG1721	FOG: Zn-finger	General function prediction only	POORLY CHARACTERIZED	nucl 24.5, cyto_nucl 16
proteinId158353	7.49773	4.17919e-09	6.77677	4.83935e-08	-0.720959	0.44145	32.4957	0.0404503	9.81636					nucl 15.5, cyto_nucl 11, cyto 5.5, mito 5
proteinId158367	5.18932	1.65083e-07	5.66566	3.02864e-09	0.476341	0.513572	8.65579	0.0920349	6.21702					extr 21, cyto 2.5, cyto_nucl 2, pero 2	Tht1
proteinId158393	NA	NA	NA	NA	NA	NA	0	0	0					mito 10, extr 6, mito_nucl 6, cyto 5
proteinId158573	-0.65695	0.0474676	2.00591	7.17361e-12	2.66286	8.30055e-20	29.1606	23.6802	97.8637	KOG2362	Uncharacterized Fe-S protein	General function prediction only	POORLY CHARACTERIZED	mito 21.5, cyto_mito 13.5, cyto 4.5	MOSC,MOSC_N
proteinId158619	0.0808925	0.959708	-1.9307	0.157144	-2.01159	0.141004	1.40295	0.675261	0.15606					mito 16, plas 6, extr 3
proteinId15869	0.757125	0.75125	2.48808	0.187452	1.73095	0.362552	0.352792	0.0910132	0.807424					cyto 8.5, cyto_nucl 6.5, mito 6, extr 4, nucl 3.5, plas 2, pero 2
proteinId158736	4.32076	0.0244821	6.94083	7.08968e-05	2.62006	0.0537838	1.43376	0	5.38572					mito 25
proteinId158753	-0.392749	0.280997	-3.94733	3.362e-38	-3.55458	6.5352e-31	1401.33	951.665	62.0458					extr 16, plas 4, vacu 4, mito 1, cyto 1, E.R. 1, cyto_mito 1	GPI-anchored
proteinId158848	1.67055	NA	-0.00889727	0.998233	-1.67945	0.485228	0.160377	0	0					mito 8, plas 5, nucl 4, extr 4, cyto_mito 4
proteinId158884	1.01316	0.353923	-1.20701	0.267754	-2.22017	0.0312823	8.5822	2.09647	0.880395					cyto 17.5, cyto_nucl 10.5, mito 4, extr 3
proteinId15891	-0.181032	0.610064	1.44283	2.0891e-07	1.62386	4.27098e-09	24.475	14.224	39.6617					nucl 20.5, cyto_nucl 12.5, cyto 3.5
proteinId158932	-0.754803	0.341363	1.72836	0.00975555	2.48317	0.000193847	5.80071	5.19202	18.0622					plas 18, mito 4, E.R. 4
proteinId158938	-1.77698	0.0134887	-3.77249	7.36e-08	-1.99551	0.00622799	4.34415	8.02943	0.562899	KOG0255	Synaptic vesicle transporter SVOP and related transporters (major facilitator superfamily)	General function prediction only	POORLY CHARACTERIZED	plas 26	MFS_1,Sugar_tr,TRI12
proteinId159004	0.289539	0.55937	-4.78763	2.13627e-20	-5.07717	1.02648e-22	19.2032	7.99375	0.278981	KOG1721	FOG: Zn-finger	General function prediction only	POORLY CHARACTERIZED	nucl 25
proteinId159110	0.368637	0.722793	-4.83558	0.000166489	-5.20422	5.23308e-05	2.55662	1.00213	0.0204999	KOG2641	Predicted seven transmembrane receptor - rhodopsin family	Signal transduction mechanisms	CELLULAR PROCESSES AND SIGNALING	plas 16, E.R. 5, mito 3, vacu 2	Solute_trans_a
proteinId159162	0.652149	0.213091	3.07171	5.66387e-12	2.41956	7.28375e-08	25.1186	8.09816	71.4178	KOG1721	FOG: Zn-finger	General function prediction only	POORLY CHARACTERIZED	nucl 21, cyto_nucl 13.5, cyto 4
proteinId159167	4.70585	0.0163669	4.5615	0.0132092	-0.144354	0.922652	2.33838	0	1.12445					mito 11, nucl 5.5, cyto_nucl 5.5, cyto 4.5, pero 3
proteinId159175	1.22688	0.00135522	1.70567	2.04631e-06	0.478794	0.209434	25.7098	5.54777	18.6427	KOG1399	Flavin-containing monooxygenase	Secondary metabolites biosynthesis, transport and catabolism	METABOLISM	cyto 11.5, cyto_nucl 8, mito 7, pero 4, nucl 3.5	FMO-like,Pyr_redox_3,Pyr_redox_2,K_oxygenase,NAD_binding_8
proteinId159226	-0.323281	0.548076	-3.78715	1.79443e-14	-3.46387	3.19521e-12	7.4864	4.79314	0.338455	KOG1080	Histone H3 (Lys4) methyltransferase complex, subunit SET1 and related methyltransferases	Chromatin structure and dynamics	INFORMATION STORAGE AND PROCESSING	nucl 12.5, cyto_nucl 11.666, mito_nucl 9.999, cyto 8.5, cyto_mito 7.999, mito 6	N-SET,SET,SET_assoc,RRM_1
proteinId159256	0.554136	0.627245	-0.31576	0.76574	-0.869896	0.385019	3.42828	1.18169	0.97158					plas 13, E.R. 7, mito 4, golg 3
proteinId159258	2.46111	0.00362074	2.31668	0.00424006	-0.144434	0.85906	7.02302	0.621551	3.35788					plas 15, mito 6, E.R. 6
proteinId159363	-0.547678	0.599556	-0.591365	0.514207	-0.0436869	0.966763	8.47294	6.59897	4.42221	KOG2533	Permease of the major facilitator superfamily	Carbohydrate transport and metabolism	METABOLISM	plas 25	MFS_1
proteinId159666	2.9685	0.167675	5.41581	0.00394133	2.44731	0.0878057	0.53669	0	1.81641					nucl 23, cyto_nucl 14
proteinId159688	3.75662	0.0280928	1.68889	0.320645	-2.06772	0.186021	4.6131	0.117861	0.508558					mito 8, plas 8, extr 5, mito_nucl 5
proteinId159710	0.703047	0.120813	-0.0506148	0.922635	-0.753661	0.0736069	69.4053	21.4774	21.1552	KOG3625	Alpha amylase	Carbohydrate transport and metabolism	METABOLISM	cyto 13, pero 6, cysk 5, nucl 2	hDGE_amylase,GDE_C,hGDE_central,hGDE_N
proteinId159757	-2.6315	3.68348e-16	-1.63904	2.64885e-07	0.992462	0.00334125	16.6102	53.1932	17.3155	KOG2186	Cell growth-regulating nucleolar protein	Cell cycle control, cell division, chromosome partitioning	METABOLISM	nucl 15.5, cyto_nucl 11, mito 8	zf-LYAR
proteinId159772	-0.448437	0.38878	-1.39923	0.00179039	-0.950791	0.0399259	23.9731	16.9533	6.50867	KOG3989	Beta-2-glycoprotein I	Extracellular structures	CELLULAR PROCESSES AND SIGNALING	plas 16, E.R. 7, mito 3	Far-17a_AIG1
proteinId159887	0.999331	0.00895524	-2.17859	5.22095e-08	-3.17792	4.7043e-16	13.3488	3.40904	0.756493	KOG1187	Serine/threonine protein kinase	Signal transduction mechanisms	CELLULAR PROCESSES AND SIGNALING	nucl 23, mito 3	Fungal_trans_2,Zn_clus
proteinId159888	4.45759	0.000292999	7.39198	1.11674e-10	2.93438	4.6974e-08	6.24132	0.0832343	25.6054					plas 15, mito 5, E.R. 5
proteinId159910	-0.0452882	0.917087	1.44884	3.6003e-06	1.49413	1.99896e-06	98.8744	51.9996	145.398	KOG0391	SNF2 family DNA-dependent ATPase	General function prediction only	POORLY CHARACTERIZED	nucl 13.5, mito 11, cyto_nucl 8.5
proteinId160003	7.30413	1.38134e-06	9.29036	1.34173e-10	1.98624	0.0130372	10.3535	0	21.7822	KOG1721	FOG: Zn-finger	General function prediction only	POORLY CHARACTERIZED	nucl 18.5, cyto_nucl 11, mito 6	zf-C2H2,zf-C2H2_4
proteinId16009	-0.212452	0.594658	-0.62334	0.0571212	-0.410888	0.231843	402.469	240.821	158.928	KOG1876	Actin-related protein Arp2/3 complex, subunit ARPC4	Cytoskeleton	CELLULAR PROCESSES AND SIGNALING	mito 16, nucl 7, cyto 4	ARPC4
proteinId160234	0.331591	0.467072	-6.76414	5.55146e-17	-7.09573	2.11564e-18	88.1095	35.7481	0.259689					mito 14, cyto 4.5, cyto_nucl 4.5, nucl 3.5, extr 2, pero 2
proteinId160247	-1.20752	0.312504	-0.111732	0.934022	1.09579	0.323669	1.05899	1.31911	1.22921					mito 16, cyto 9
proteinId160334	0.974727	0.00108781	1.13423	5.61343e-05	0.159504	0.616891	281.219	72.9078	164.199	KOG1474	Transcription initiation factor TFIID, subunit BDF1 and related bromodomain proteins	Transcription	INFORMATION STORAGE AND PROCESSING	nucl 18.5, cyto_nucl 14.5, cyto 7.5
proteinId160461	2.47212	0.000336034	8.01098	1.18426e-36	5.53886	8.73187e-22	13.444	1.17199	345.416					plas 17, mito 4, golg 2, cyto_mito 2
proteinId160503	-0.922016	0.0140874	-5.60739	2.63868e-58	-4.68537	1.21294e-40	316.755	305.877	6.23066					mito 17, cyto 3.5, cyto_nucl 3.5, nucl 2.5, plas 2	FA_desaturase,DUF3474
proteinId160504	-0.51204	0.233264	3.57277	1.6806e-23	4.08481	2.60315e-30	31.8088	23.0514	284.808					mito 14, nucl 9, cyto_nucl 7, cyto 3
proteinId160608	-0.287891	0.771282	-3.68976	8.98241e-05	-3.40187	0.000344972	4.95882	3.11931	0.21987					nucl 21.5, cyto_nucl 15, cyto 5.5
proteinId160732	5.63221	0.000565458	7.8773	2.66003e-07	2.24509	0.00181526	3.96408	0	10.0736					mito 13, nucl 9.5, cyto_nucl 6, extr 3
proteinId160736	5.86316	2.34211e-08	13.9451	2.04981e-44	8.08197	4.27601e-121	10.676	0.0436211	1568.94					cyto_nucl 10, nucl 9.5, cyto 9.5, cysk 5
proteinId160842	0.89901	0.100456	-0.0458906	0.948321	-0.944901	0.0645562	10.7871	2.95726	2.9116					plas 10, E.R. 6, extr 4, vacu 3, cyto 2
proteinId160884	0.273219	0.548335	-2.78178	1.48277e-12	-3.055	7.03324e-15	22.0969	9.33568	1.37146	KOG0118	FOG: RRM domain	General function prediction only	POORLY CHARACTERIZED	nucl 17, mito 4, cyto 3, extr 3	RRM_1,RRM_6
proteinId160900	0.0607987	0.93554	0.670758	0.241758	0.609959	0.301442	30.6518	15.1987	25.0593					nucl 14.5, cyto_nucl 10.5, cyto 5.5, mito 3, pero 3
proteinId160918	1.67618	0.0135695	-0.300919	0.692717	-1.97709	0.00236056	8.43917	1.321	1.09301	KOG0395	Ras-related GTPase	General function prediction only	POORLY CHARACTERIZED	cysk 21, nucl 4, cyto_nucl 4	Ras,Miro,Arf
proteinId161130	-0.457981	0.193399	-0.962585	0.00210835	-0.504605	0.124832	29.699	20.957	10.9446					mito 24, cyto 2	Abhydrolase_1,Abhydrolase_6
proteinId161180	0.797314	0.104905	-4.40953	1.76201e-13	-5.20684	2.46192e-18	15.2134	4.42743	0.196498	KOG0590	Checkpoint kinase and related serine/threonine protein kinases	Cell cycle control, cell division, chromosome partitioning	METABOLISM	cyto 12, cyto_nucl 11.5, nucl 9, mito 3, pero 3	Pkinase,Pkinase_Tyr
proteinId161335	1.09875	NA	-0.00889727	0.998233	-1.10765	0.649516	0.11356	0	0					nucl 18.5, cyto_nucl 13.5, cyto 5.5
proteinId161394	-1.62503	0.050987	3.35678	1.26187e-07	4.98181	2.80466e-13	0.583817	0.959991	10.4351					plas 12, mito 9, E.R. 5
proteinId161431	-0.0769503	0.911467	-0.692189	0.196079	-0.615239	0.2645	38.6144	20.6356	12.8808					cyto_nucl 8, nucl 7, cyto 7, cysk 7, mito 4
proteinId161539	2.10757	0.000867448	7.6772	2.9636e-42	5.56963	2.04018e-46	4.08376	0.463898	104.379					plas 16, mito 5, E.R. 4
proteinId161708	2.87078	3.96449e-05	3.84493	6.51101e-09	0.974149	0.0821873	13.4115	0.897657	13.934	KOG1187	Serine/threonine protein kinase	Signal transduction mechanisms	CELLULAR PROCESSES AND SIGNALING	nucl 15.5, cyto_nucl 10, mito 8
proteinId16173	0.804905	0.0814468	-0.639514	0.148521	-1.44442	0.000681031	9.04371	2.62165	1.71739	KOG1127	TPR repeat-containing protein	RNA processing and modification	INFORMATION STORAGE AND PROCESSING	nucl 9, cyto_nucl 9, mito 7, cyto 7, plas 1, pero 1, E.R. 1, cysk 1	TPR_11,TPR_2,TPR_16,TPR_1,TPR_14,TPR_17,TPR_19,TPR_12,TPR_8,TPR_7,TPR_6,TPR_20
proteinId161770	0.256536	0.878067	1.15672	0.383221	0.900182	0.498257	1.15798	0.486157	1.17134					nucl 13.5, mito 11, cyto_nucl 8
proteinId161872	0.0182951	0.982235	-2.08651	0.000401841	-2.1048	0.000390706	10.9332	5.59344	1.31951	KOG1216	von Willebrand factor and related coagulation proteins	Extracellular structures	CELLULAR PROCESSES AND SIGNALING	extr 23, pero 2
proteinId161917	0.421512	0.724733	-1.85653	0.0595611	-2.27804	0.0208347	3.1515	1.18559	0.307013	KOG4297	C-type lectin	Signal transduction mechanisms	CELLULAR PROCESSES AND SIGNALING	nucl 21, mito 3, cyto 3, cyto_mito 3
proteinId161924	0.24926	0.862798	-2.82868	0.0274235	-3.07794	0.0166146	3.1786	1.33632	0.15035	KOG1895	mRNA cleavage and polyadenylation factor II complex, subunit PTA1	RNA processing and modification	INFORMATION STORAGE AND PROCESSING	nucl 19, cyto_nucl 13, cyto 5
proteinId161969	0.0707936	0.918216	-1.11544	0.0399151	-1.18623	0.0284599	2.10867	1.03433	0.483139	KOG2277	S-M checkpoint control protein CID1 and related nucleotidyltransferases	Cell cycle control, cell division, chromosome partitioning	METABOLISM	nucl 23.5, cyto_nucl 13.5	PAP_assoc
proteinId161987	-0.417018	0.358033	-2.04321	1.58682e-07	-1.62619	3.88441e-05	60.5059	41.7665	10.2584					plas 16, extr 6, E.R. 3
proteinId162126	2.4175	0.0879964	2.69499	0.0385065	0.277483	0.836826	1.80226	0.146921	1.18283					mito_nucl 11.833, mito 11.5, nucl 11, cyto_nucl 7.833
proteinId162159	0.937459	0.0352283	5.02559	3.0697e-38	4.08813	3.08383e-28	12.9132	3.42436	117.124					plas 18, mito 4, E.R. 4
proteinId162212	-1.2473	0.00180211	-2.01432	1.3261e-07	-0.767013	0.0580224	17.1542	20.9447	5.21521	KOG2806	Chitinase	Carbohydrate transport and metabolism	METABOLISM	nucl 23, cyto_nucl 14.5
proteinId162262	0.294738	0.672095	-2.26433	0.000232795	-2.55907	2.72094e-05	4.87908	2.05352	0.422214	KOG1878	Nuclear receptor coregulator SMRT/SMRTER, contains Myb-like domains	Transcription	INFORMATION STORAGE AND PROCESSING	nucl 21.5, cyto_nucl 14.5, cyto 4.5	GCR1_C
proteinId162340	1.65684	NA	0.998261	0.686431	-0.658576	0.801988	0.299074	0	0.0683567	KOG1187	Serine/threonine protein kinase	Signal transduction mechanisms	CELLULAR PROCESSES AND SIGNALING	nucl 16, mito 4, cyto 4, cyto_mito 4
proteinId162371	1.83484	NA	4.20496	0.0507996	2.37012	0.250711	0.237041	0	0.998505					mito 19, nucl 7, cyto_nucl 5
proteinId162403	-0.244966	0.886978	-1.09237	0.433767	-0.847404	0.559159	4.60583	2.78937	1.25805					nucl 17.5, cyto_nucl 11, mito 6
proteinId162556	-0.0416939	0.936658	-0.499293	0.217734	-0.457599	0.273241	56.7336	29.7136	21.4234	KOG2624	Triglyceride lipase-cholesterol esterase	Lipid transport and metabolism	METABOLISM	mito 11, extr 8, cyto_mito 8	Abhydrolase_1,Abhydro_lipase,Abhydrolase_6
proteinId162579	0.759744	0.0044752	-0.886632	0.000431535	-1.64638	3.69685e-11	243.496	73.5647	40.508	KOG0159	Cytochrome P450 CYP11/CYP12/CYP24/CYP27 subfamilies	Secondary metabolites biosynthesis, transport and catabolism	METABOLISM	E.R. 8, cyto 5, mito 4, extr 4, plas 3, mito_nucl 3, cyto_pero 3	p450
proteinId162604	3.11788	0.00493898	4.58958	7.35538e-06	1.47169	0.0629074	1.31331	0.0648484	1.9595	KOG1216	von Willebrand factor and related coagulation proteins	Extracellular structures	CELLULAR PROCESSES AND SIGNALING	nucl 22, cyto_nucl 15.5, cyto 5
proteinId162605	3.06592	8.41818e-08	4.79896	1.26821e-18	1.73304	0.000127645	5.52793	0.319749	9.64421					nucl 9.5, cyto_nucl 8.333, pero 7.5, cyto_pero 7.333, cyto 6	2OG-FeII_Oxy_2
proteinId162670	-0.913501	0.00557269	-8.17048	7.13751e-138	-7.25698	8.15522e-109	1597.25	1557	5.34212					cyto 13, cyto_nucl 9, mito 5, pero 4, nucl 3
proteinId162725	1.06103	0.0441499	0.95382	0.0522405	-0.107209	0.848763	89.4141	22.1689	44.14					plas 18, mito 6, E.R. 3, cyto_mito 3, mito_nucl 3
proteinId162732	-0.947739	0.0292039	-2.62251	1.21956e-10	-1.67477	5.86935e-05	13.3087	13.3424	2.17989	KOG1216	von Willebrand factor and related coagulation proteins	Extracellular structures	CELLULAR PROCESSES AND SIGNALING	nucl 15, mito 5, cyto 4, pero 3
proteinId162845	-0.125786	0.905582	-0.572436	0.500598	-0.44665	0.615553	314.688	170.594	116.085	KOG1286	Amino acid transporters	Amino acid transport and metabolism	METABOLISM	plas 22, E.R. 2, vacu 2	AA_permease,AA_permease_2
proteinId162913	0.245232	0.47828	1.8567	2.4036e-11	1.61147	6.80991e-09	40.7252	17.5436	65.1197					nucl 15, cyto_nucl 11.5, mito 5, cyto 4
proteinId162973	1.36177	0.313234	0.569132	0.667503	-0.792643	0.522106	1.48675	0.279314	0.43488					nucl 15, cyto_nucl 11.5, mito 8, cyto 4
proteinId163393	1.25398	0.00467948	0.377838	0.395807	-0.876143	0.0421616	87.581	18.4201	24.5796					mito 7, cyto 6.5, cyto_nucl 5.5, plas 5, pero 4, nucl 3.5	HET
proteinId163592	-0.163478	0.756096	-0.494685	0.242715	-0.331207	0.456318	35.96	20.4321	14.7261					nucl 18.5, cyto_nucl 12.5, cyto 5.5
proteinId163835	-0.835441	0.125525	-1.01704	0.0397629	-0.181599	0.744607	42.8345	38.8105	19.3505					nucl 17, mito 4, cyto 4, cyto_mito 4
proteinId163919	-1.29295	0.000416829	-0.796167	0.0248818	0.49678	0.183121	12.7088	16.0916	9.45677	KOG4597	Serine proteinase inhibitor (KU family) with thrombospondin repeats	Posttranslational modification, protein turnover, chaperones	CELLULAR PROCESSES AND SIGNALING	extr 15, cyto 5, E.R. 2, mito 1, pero 1, golg 1, cysk 1, vacu 1
proteinId164342	3.30598	8.88168e-12	4.93603	3.68114e-26	1.63005	1.0895e-05	31.8262	1.58459	52.0303					plas 11, mito 9, cyto 3.5, cyto_nucl 3, nucl 1.5
proteinId164464	0.920619	0.465111	-1.06911	0.376669	-1.98973	0.0835799	3.29886	0.86254	0.388638					nucl 12.5, cyto_nucl 10.5, mito 8, cyto 5.5
proteinId164471	2.01846	NA	-1.46886	0.542756	-3.48732	0.129034	1.01843	0.0856849	0					nucl 17.5, cyto_nucl 12, mito 6
proteinId164596	0.524969	0.299138	0.833828	0.059245	0.308859	0.518968	133.744	47.458	87.3584	KOG0868	Glutathione S-transferase	Posttranslational modification, protein turnover, chaperones	CELLULAR PROCESSES AND SIGNALING	mito 13, cysk 8, cyto 4
proteinId164681	-0.191346	0.803871	1.00202	0.095317	1.19337	0.0488189	12.1686	7.11269	14.5951					nucl 16, cyto_nucl 11, mito 6, cyto 4	Ran-binding
proteinId164791	-0.295362	0.584466	-1.64918	0.000162967	-1.35381	0.0023901	72.4748	45.7208	14.7761	KOG1474	Transcription initiation factor TFIID, subunit BDF1 and related bromodomain proteins	Transcription	INFORMATION STORAGE AND PROCESSING	mito 15, nucl 9, cyto 2
proteinId164920	2.96077	0.0318641	7.37334	1.33525e-09	4.41257	7.40705e-10	1.08365	0.0432818	13.1358					mito 14, nucl 10.5, cyto_nucl 6
proteinId164955	2.2072	0.000277235	3.66247	1.08517e-10	1.45527	0.00655924	4.3622	0.471118	6.3979	KOG4177	Ankyrin	Cell wall/membrane/envelope biogenesis	CELLULAR PROCESSES AND SIGNALING	nucl 14.5, cyto_nucl 12, cyto 8.5, pero 3	Ank_2,Ank,NACHT,Ank_4,Ank_3
proteinId165054	-0.791014	0.724733	5.16824	0.000422787	5.95926	3.66757e-05	0.116852	0.124181	6.52717					nucl 13, cyto 8.5, cyto_mito 6.5, mito 3.5
proteinId165080	-0.130107	0.764747	-2.4796	1.5002e-12	-2.3495	2.33397e-11	16.7127	9.35248	1.69865	KOG2068	MOT2 transcription factor	Transcription	INFORMATION STORAGE AND PROCESSING	nucl 24.5, cyto_nucl 13.5	zf-RING_4,RRM_1
proteinId165100	0.436748	0.504687	2.63069	3.3819e-07	2.19395	5.80335e-06	4.45688	1.67272	10.8692					extr 13, plas 7, mito 4, vacu 3
proteinId165496	1.51612	0.0452985	-0.319529	0.69872	-1.83565	0.0105503	9.62012	1.68056	1.35704					nucl 19.5, cyto_nucl 13, mito 4
proteinId165549	0.902862	NA	1.27299	0.593468	0.370124	0.889066	0.158608	0	0.145007					mito 10, plas 5, cyto 4, cysk 3, nucl 2, extr 2, cyto_pero 2
proteinId165553	-0.628879	0.16082	-2.86409	1.51565e-12	-2.23521	5.09916e-08	24.3799	19.5876	2.69158	KOG1869	Splicing coactivator SRm160/300, subunit SRm300	RNA processing and modification	INFORMATION STORAGE AND PROCESSING	nucl 20.5, cyto_nucl 13.5, cyto 3.5	DUF3295
proteinId165756	-0.429072	NA	-2.94562	0.187452	-2.51655	0.275543	0.201007	0.152826	0					nucl 16, mito 5, cyto 5, cyto_mito 5
proteinId166175	-2.64271	0.00369062	-0.937131	0.286089	1.70558	0.0597332	0.735436	2.49531	1.29102					nucl 14.5, cyto_nucl 11.5, cyto 7.5, mito 3
proteinId166284	2.84914	3.20281e-09	4.0431	2.30231e-18	1.19397	0.00418362	4.15651	0.285177	4.96028					mito 14, plas 5, nucl 3, cyto 2, extr 1, pero 1, golg 1
proteinId166329	2.17445	0.0793822	5.34401	7.61162e-07	3.16956	0.00027978	2.72842	0.252615	13.5663					plas 17, mito 4, E.R. 2, golg 2, cyto_mito 2, mito_nucl 2
proteinId166395	-0.23384	0.76585	-4.53547	3.43856e-13	-4.30163	7.6123e-12	69.9976	41.8062	1.72746	KOG3599	Ca2+-modulated nonselective cation channel polycystin	Inorganic ion transport and metabolism	METABOLISM	nucl 25, cyto_nucl 14.5	Zn_clus
proteinId166418	1.04752	NA	-0.0339678	0.998233	-1.08149	0.548318	0.762923	0.172153	0.17158					nucl 12, cyto_nucl 11.166, cyto 8, cyto_mito 6.499, cyto_pero 4.999, mito 3.5
proteinId16663	0.315542	0.416078	0.661568	0.04554	0.346026	0.321365	33.3051	13.7722	22.2679	KOG4534	Uncharacterized conserved protein	Function unknown	POORLY CHARACTERIZED	nucl 16, cyto 7.5, cyto_mito 6, mito 3.5	KAT11
proteinId166653	0.902862	NA	1.27299	0.593468	0.370124	0.889066	0.114738	0	0.104899					mito 24, cyto 2.5
proteinId166772	-2.18084	3.01448e-09	-0.236965	0.547098	1.94388	7.05974e-08	61.9168	144.04	124.759	KOG0758	Mitochondrial carnitine-acylcarnitine carrier protein	Energy production and conversion	METABOLISM	mito 11, E.R. 5, cyto 3.5, cyto_nucl 3, plas 2, extr 2, nucl 1.5	Mito_carr
proteinId166808	-0.393838	0.243875	-3.39058	1.77808e-27	-2.99674	1.33024e-21	24.7509	16.6533	1.5995	KOG0240	Kinesin (SMY1 subfamily)	Cytoskeleton	CELLULAR PROCESSES AND SIGNALING	nucl 10, cyto_nucl 9.833, mito_nucl 9.333, cyto 8.5, mito 7.5	Kinesin
proteinId166815	-0.888328	0.276678	-6.87855	1.03087e-05	-5.99022	0.000155243	6.68909	6.42769	0					nucl 11, cyto 9, mito 6
proteinId166843	2.02005	0.328665	8.19625	7.26198e-07	6.1762	4.11825e-11	0.340634	0	14.9598					plas 12, mito 4, extr 4, E.R. 4, vacu 3
proteinId166891	-0.844188	0.109406	-5.19388	7.14771e-27	-4.34969	5.44692e-19	77.9137	73.2401	1.94619	KOG3734	Predicted phosphoglycerate mutase	Carbohydrate transport and metabolism	METABOLISM	mito 17, nucl 6.5, cyto_nucl 5.5, cyto 3.5	His_Phos_1
proteinId166944	-0.81217	0.0832221	-3.39272	1.28318e-14	-2.58055	7.33421e-09	5.61805	5.07834	0.485131	KOG0519	Sensory transduction histidine kinase	Signal transduction mechanisms	CELLULAR PROCESSES AND SIGNALING	nucl 11, mito 7, cyto 7, cyto_mito 7	HATPase_c,Response_reg,HisKA,PAS_3,PAS_9,PAS,PAS_4
proteinId167147	3.56863	0.0317209	10.6524	3.18703e-13	7.08376	5.09154e-38	1.22995	0	92.1326					nucl 19, cyto 5, mito 2
proteinId167255	3.10288	6.34652e-11	-0.199368	0.715902	-3.30225	1.48699e-12	150.126	8.61614	7.64336					cysk 11, nucl 8.5, cyto_nucl 7, cyto 4.5
proteinId167557	0.00984041	0.988636	-2.30586	1.7976e-06	-2.3157	1.71192e-06	7.85027	4.01356	0.815349	KOG4436	Predicted GTPase activator NB4S/EVI5 (contains TBC domain)/Calmodulin-binding protein Pollux (contains PTB and TBC domains)	General function prediction only	POORLY CHARACTERIZED	nucl 16, cyto 7, mito 2, cysk 2	RabGAP-TBC
proteinId167568	1.74865	0.0409229	7.93926	5.3429e-28	6.19062	2.17002e-38	2.97645	0.410012	119.057					mito 13.5, nucl 9, cyto_mito 9, cyto 3.5
proteinId167576	-0.259421	0.597298	-0.968187	0.0162024	-0.708766	0.0885933	40.062	24.7121	12.8676	KOG2918	Carboxymethyl transferase	Posttranslational modification, protein turnover, chaperones	CELLULAR PROCESSES AND SIGNALING	mito 18, cyto 4, nucl 3	LCM
proteinId167601	1.33846	NA	1.85541	0.443755	0.516954	0.845549	0.135921	0	0.128475					mito 14, extr 8, cyto 2.5, cyto_nucl 2, pero 2
proteinId167844	0.493853	0.176491	1.12822	0.000421867	0.634364	0.0568962	226.592	81.7211	182.828	KOG0044	Ca2+ sensor (EF-Hand superfamily)	Signal transduction mechanisms	CELLULAR PROCESSES AND SIGNALING	cyto 12, cyto_nucl 11.833, nucl 10.5, cyto_pero 6.833	EF-hand_1,EF-hand_6,EF-hand_7,EF-hand_5,EF-hand_8,EF-hand_4
proteinId168117	-2.63669	0.000946353	-2.83379	0.000320404	-0.197099	0.835963	2.29014	7.6582	1.04765					mito 10.5, extr 8, cyto_mito 7.5, nucl 4, cyto 3.5
proteinId168203	-2.82423	9.18144e-05	-5.79027	8.13066e-17	-2.96604	3.28007e-05	17.3257	64.8533	1.08979	KOG1869	Splicing coactivator SRm160/300, subunit SRm300	RNA processing and modification	INFORMATION STORAGE AND PROCESSING	nucl 26, cyto_nucl 14.5	zf-C2H2,zf-C2H2_4
proteinId168340	1.14563	0.117681	1.34536	0.04473	0.199728	0.783598	4.39757	0.995168	2.65505					plas 16, E.R. 6, mito 4
proteinId168684	-0.641836	0.0443897	-4.85833	4.66351e-45	-4.21649	5.54911e-34	97.9211	78.5725	2.70875					nucl 13, mito 10, cyto_nucl 9.5, cyto 4
proteinId169039	-0.0309544	0.964184	-2.69262	1.31614e-07	-2.66166	2.08072e-07	13.2355	6.8611	1.0485	KOG3872	FOG: FHA domain	Signal transduction mechanisms	CELLULAR PROCESSES AND SIGNALING	cyto 10.5, cyto_nucl 10, nucl 8.5, mito 5	FHA
proteinId169094	-0.89933	0.0025988	0.662915	0.019969	1.56224	2.24241e-08	243.327	231.765	375.906	KOG3981	Deoxyribose-phosphate aldolase	Nucleotide transport and metabolism	METABOLISM	cyto 24, cyto_nucl 13.5	DeoC
proteinId16914	0.608914	0.15956	2.53037	1.01355e-11	1.92146	1.95907e-07	22.7004	7.62644	45.3965	KOG4276	Predicted hormone receptor interactor	General function prediction only	POORLY CHARACTERIZED	mito 18, nucl 5.5, cyto_nucl 4.5, cyto 2.5
proteinId169143	2.88211	0.0114467	4.03296	0.000122018	1.15085	0.170317	2.19291	0.130648	2.63634	KOG1922	Rho GTPase effector BNI1 and related formins	Cytoskeleton	CELLULAR PROCESSES AND SIGNALING	extr 10, plas 5, mito 4, vacu 4, E.R. 2, golg 2, cyto_mito 2, mito_nucl 2	SUR7
proteinId169202	3.20595	3.52551e-07	2.94942	1.36403e-06	-0.256527	0.699573	11.8917	0.632267	5.18873	KOG2510	SWI-SNF chromatin-remodeling complex protein	Chromatin structure and dynamics	INFORMATION STORAGE AND PROCESSING	nucl 13, cyto 4, plas 3, pero 3, cyto_mito 3
proteinId169311	0.105371	0.934744	-4.13787	0.00255142	-4.24324	0.00208542	2.91975	1.37774	0.0508284					plas 15, nucl 6, mito 2, cyto 1, extr 1, E.R. 1, golg 1
proteinId169350	NA	NA	NA	NA	NA	NA	0	0	0					mito 19, nucl 4.5, cyto_nucl 3.5, cyto 1.5
proteinId169364	0.387425	0.681436	0.383568	0.641857	-0.00385702	0.996275	8.59445	3.37179	4.55168					plas 12, mito 11, cyto 1, pero 1, E.R. 1, golg 1, cyto_pero 1
proteinId169411	3.76208	1.90023e-06	3.9906	1.4727e-07	0.228519	0.789637	30.6302	1.08282	19.1076					nucl 15, cyto_nucl 12, cyto 7, mito 4	Methyltransf_23,Methyltransf_31
proteinId169457	3.56236	0.00855684	3.12684	0.0156226	-0.43552	0.702466	3.60318	0.113402	1.3591					plas 13, mito 9, E.R. 2, golg 2
proteinId169461	4.38354	0.00791057	9.31461	4.77427e-10	4.93106	8.75137e-17	3.23607	0	54.4554					cyto 16, nucl 3, mito 2, extr 2, pero 2, cysk 2
proteinId169513	2.74091	8.71182e-07	1.60694	0.00403862	-1.13398	0.0298977	7.88579	0.583856	1.84442	KOG1187	Serine/threonine protein kinase	Signal transduction mechanisms	CELLULAR PROCESSES AND SIGNALING	nucl 12, mito 11, cyto 3
proteinId170096	3.21199	0.0298906	2.4628	0.0826591	-0.749197	0.563735	2.69112	0.11364	0.800297					cyto_nucl 9.833, cyto 9.5, cyto_mito 8.166, nucl 8, mito 5.5
proteinId170175	3.60426	3.37119e-10	1.57985	0.00766099	-2.02441	9.28468e-05	9.85556	0.402302	1.25361	KOG1878	Nuclear receptor coregulator SMRT/SMRTER, contains Myb-like domains	Transcription	INFORMATION STORAGE AND PROCESSING	nucl 21.5, cyto_nucl 15, cyto 5.5
proteinId17019	0.68373	0.422475	4.63297	1.84227e-12	3.94924	2.64667e-12	1.92519	0.595657	16.2073	KOG1187	Serine/threonine protein kinase	Signal transduction mechanisms	CELLULAR PROCESSES AND SIGNALING	nucl 23.5, cyto_nucl 13
proteinId170716	3.7802	6.65028e-09	5.14777	2.05442e-16	1.36758	0.00585905	19.357	0.681483	26.5926					nucl 16.5, cyto_nucl 10.5, mito 6, cyto 3.5
proteinId171120	0.924307	0.17189	1.38047	0.0219971	0.456167	0.487665	134.093	36.5575	98.1345	KOG0189	Phosphoadenosine phosphosulfate reductase	Amino acid transport and metabolism	METABOLISM	nucl 13, cyto_nucl 11.5, cyto 8, mito 3	PAPS_reduct
proteinId171147	1.99761	1.74232e-10	4.29346	1.46972e-46	2.29585	5.16273e-15	42.6426	5.436	110.579					cyto 11.5, mito 9, cyto_nucl 8.5, nucl 4.5	DUF2042
proteinId171166	1.01216	0.435496	3.36455	0.00138286	2.35239	0.0131713	1.15413	0.272881	3.34641	KOG0115	RNA-binding protein p54nrb (RRM superfamily)	RNA processing and modification	INFORMATION STORAGE AND PROCESSING	mito_nucl 10.166, nucl 10, mito 10, cyto_nucl 9.5
proteinId171171	-1.52556	0.00125363	-5.54892	3.89963e-31	-4.02336	9.79862e-17	66.7167	100.752	2.07834	KOG0260	RNA polymerase II, large subunit	Transcription	INFORMATION STORAGE AND PROCESSING	extr 15, mito 3, plas 3, cyto 2.5, cyto_nucl 2.5, nucl 1.5
proteinId171195	1.41321	NA	2.38057	0.319803	0.967357	0.707215	0.308153	0	0.504653					nucl 13.5, cyto_nucl 9.5, mito 5, cyto 4.5, extr 1, pero 1, E.R. 1, golg 1
proteinId171215	1.7859	0.0345742	6.26505	6.45069e-18	4.47915	1.1577e-17	3.17243	0.434352	38.8074					mito 15, plas 5, nucl 3, pero 2
proteinId171258	1.48553	0.3912	1.96893	0.195739	0.483407	0.753911	1.25445	0.194444	0.962941					mito 9.5, cyto_mito 8.833, cyto_nucl 7.333, cyto 7, nucl 6.5
proteinId171267	-0.911875	0.00149351	-2.3541	5.63185e-18	-1.44222	2.04706e-07	43.8689	42.5222	8.43171	KOG1878	Nuclear receptor coregulator SMRT/SMRTER, contains Myb-like domains	Transcription	INFORMATION STORAGE AND PROCESSING	mito 14, nucl 8, cyto 5
proteinId171372	5.10835	3.39097e-08	0.648237	0.537883	-4.46011	2.66258e-07	27.5677	0.358965	0.602701					nucl 12.5, cyto_nucl 9, mito 5, cyto 4.5, extr 2, pero 2
proteinId171511	1.91974	0.272228	2.09197	0.186227	0.172225	0.915408	1.46678	0.159136	0.895723					cyto_nucl 10.5, nucl 9.5, cyto 8.5, mito 4, pero 3
proteinId171783	4.14774	5.04661e-07	0.0188474	0.998072	-4.12889	2.62882e-07	90.1162	2.41038	2.50058					plas 9, extr 7, mito 5, nucl 2, cyto 2, cyto_nucl 2
proteinId171808	2.00507	0.000504995	-1.3741	0.0166559	-3.37917	1.21754e-09	79.3913	10.1249	3.93981	KOG1314	DHHC-type Zn-finger protein	General function prediction only	POORLY CHARACTERIZED	plas 21, E.R. 2, mito 1, extr 1, pero 1, vacu 1	zf-DHHC
proteinId1720	-0.745613	0.53594	-2.77052	0.00571849	-2.0249	0.051039	14.5006	12.7433	1.68804					nucl 17, cyto 5, mito 2, extr 2
proteinId172098	-1.29251	0.0249781	-1.65784	0.00191522	-0.365327	0.539451	15.55	19.8981	6.28647	KOG4157	beta-1,6-N-acetylglucosaminyltransferase, contains WSC domain	Carbohydrate transport and metabolism	METABOLISM	nucl 14.5, cyto_nucl 10.5, cyto 5.5, mito 5
proteinId172109	3.66699	0.0400511	8.26685	1.82302e-07	4.59986	1.68951e-09	0.850884	0	11.5669					mito 12, nucl 11.5, cyto_nucl 7.5, cyto 2.5
proteinId172183	1.05579	0.0516963	-1.27967	0.0121449	-2.33546	3.0443e-06	33.873	8.13776	3.37601	KOG0115	RNA-binding protein p54nrb (RRM superfamily)	RNA processing and modification	INFORMATION STORAGE AND PROCESSING	mito 16.5, mito_nucl 11.5, nucl 5.5, extr 3
proteinId172187	1.55691	0.0976624	2.51402	0.00285312	0.957104	0.22803	5.27198	0.863735	5.39012					mito 11, plas 7, extr 4, E.R. 2, cyto 1, golg 1, vacu 1
proteinId172276	2.73188	7.77321e-06	1.95252	0.00120427	-0.77936	0.180754	7.32679	0.53858	2.19789	KOG1216	von Willebrand factor and related coagulation proteins	Extracellular structures	CELLULAR PROCESSES AND SIGNALING	nucl 13, mito 9, cyto 4
proteinId172357	0.262784	0.510343	-3.37114	6.21387e-22	-3.63393	3.11781e-25	20.1499	8.57542	0.835519	KOG2146	Splicing coactivator SRm160/300, subunit SRm160 (contains PWI domain)	General function prediction only	POORLY CHARACTERIZED	nucl 20.5, cyto_nucl 14.5, cyto 5.5	Anillin,PH
proteinId172387	1.31642	9.09958e-05	6.3806	2.26361e-97	5.06418	8.63571e-77	26.6927	5.46507	474.356					plas 20, E.R. 4, mito 1, golg 1, vacu 1
proteinId172636	-0.258494	0.570088	-1.35659	0.000343137	-1.0981	0.00433301	12.0586	7.40759	2.9224	KOG2589	Histone tail methylase	Chromatin structure and dynamics	INFORMATION STORAGE AND PROCESSING	nucl 22.5, cyto_nucl 13.5, cyto 3.5	SET
proteinId172807	-0.101669	0.895768	1.68124	0.00351579	1.78291	0.00193806	17.8186	9.86832	33.0586					plas 15, mito 5, E.R. 3, vacu 2
proteinId172833	4.35658	0.00228096	4.00771	0.00334181	-0.348867	0.737281	3.79698	0.0565365	1.55257					mito 11, plas 7, extr 5, E.R. 2
proteinId172923	5.00023	0.00419869	6.56656	5.26649e-05	1.56634	0.0590674	1.49219	0	2.37819					mito 21, cyto 4
proteinId173138	2.20309	4.11996e-06	3.79935	5.64572e-17	1.59627	0.00048308	15.4232	1.66549	24.4605	KOG1878	Nuclear receptor coregulator SMRT/SMRTER, contains Myb-like domains	Transcription	INFORMATION STORAGE AND PROCESSING	nucl 12.5, cyto_nucl 9.5, mito 9, cyto 5.5
proteinId173231	2.07478	0.054243	5.72818	1.18223e-09	3.6534	3.31835e-06	2.36633	0.257328	17.2342					plas 13, mito 9, nucl 2, cyto 2, cyto_nucl 2
proteinId173294	3.04063	0.00364415	5.49285	8.96819e-09	2.45222	0.000213252	5.25222	0.273809	15.7193					mito 14, nucl 9, cyto 3
proteinId173429	0.846009	0.0670966	-4.08012	4.57002e-16	-4.92613	6.90064e-23	18.5058	5.19758	0.298785	KOG1869	Splicing coactivator SRm160/300, subunit SRm300	RNA processing and modification	INFORMATION STORAGE AND PROCESSING	nucl 24, cyto_nucl 14.5
proteinId173617	2.4022	0.03191	8.02068	1.16839e-16	5.61848	9.83948e-25	1.69607	0.128207	46.0366					mito 25
proteinId173628	5.96503	5.49308e-05	-0.00588352	0.998233	-5.97091	2.73133e-05	4.66236	0.0227267	0.0247321	KOG4157	beta-1,6-N-acetylglucosaminyltransferase, contains WSC domain	Carbohydrate transport and metabolism	METABOLISM	nucl 20, cyto 5
proteinId173645	5.873	2.94829e-26	6.16603	1.23657e-29	0.293032	0.603484	77.9358	0.622929	49.3474					nucl 20.5, cyto_nucl 13.5, cyto 5.5
proteinId173692	2.72203	0.0011393	-0.681692	0.426412	-3.40373	1.96665e-05	61.2459	4.63358	2.91804	KOG2386	mRNA capping enzyme, guanylyltransferase (alpha) subunit	RNA processing and modification	INFORMATION STORAGE AND PROCESSING	cyto 6.5, extr 6, plas 5, cyto_nucl 5, mito 3, nucl 2.5, pero 2, E.R. 2	Abhydrolase_6,Abhydrolase_5,DSPc,Abhydrolase_1
proteinId173852	0.16041	0.764179	-5.20311	1.08703e-15	-5.36352	1.58422e-16	12.2707	5.60496	0.139608	KOG2483	Upstream transcription factor 2/L-myc-2 protein	Transcription	INFORMATION STORAGE AND PROCESSING	nucl 23, cyto_nucl 14.5	HLH
proteinId173858	1.30251	0.0163176	5.51353	9.21117e-31	4.21102	1.36102e-21	8.02692	1.6508	80.9298					plas 11, mito 8, E.R. 6
proteinId173886	5.33854	0.0011132	8.14467	9.2449e-08	2.80613	4.05935e-05	2.19475	0	8.2873					mito 16.5, mito_nucl 11.666, nucl 5.5, cyto_nucl 5.333, cyto 3
proteinId173899	7.432	2.83805e-05	2.48095	0.189355	-4.95104	1.16824e-05	8.34513	0	0.116348					nucl 16, cyto_nucl 15.333, cyto 10.5, cyto_mito 6.332
proteinId173900	4.30826	9.44586e-11	5.10747	2.37247e-15	0.799209	0.121471	18.4333	0.429503	16.8473					nucl 12.5, mito 11, cyto_nucl 8, cyto 2.5
proteinId173918	-0.0423896	0.951615	-3.2103	9.14053e-08	-3.16791	1.37878e-07	8.90321	4.72427	0.497565					cysk 11, cyto 6.5, pero 6, cyto_nucl 4.5, mito 2	Methyltransf_23,Methyltransf_31,Methyltransf_18,Methyltransf_11,Methyltransf_12,Methyltransf_25
proteinId173995	3.03862	NA	3.77607	0.0684059	0.737445	0.698723	0.649902	0	0.620527					mito 14, extr 5, nucl 4, cyto 3
proteinId174065	1.03266	0.0288092	-1.20641	0.010569	-2.23907	8.0985e-07	7.16823	1.78142	0.776645	KOG3586	TBX1 and related T-box transcription factors	Transcription	INFORMATION STORAGE AND PROCESSING	nucl 15.5, cyto_nucl 10, cyto 3.5, mito 3, pero 3	Fungal_trans
proteinId174082	0.701113	0.69785	2.80445	0.0474294	2.10333	0.134956	0.920553	0.272489	2.46914					mito 9.5, extr 9, cyto_mito 8.5, cyto 6.5
proteinId174089	1.201	0.00557834	2.01585	4.71938e-07	0.814847	0.0491967	11.2159	2.46779	10.3191	KOG1721	FOG: Zn-finger	General function prediction only	POORLY CHARACTERIZED	nucl 25
proteinId174139	2.12378	0.336635	6.42415	0.000382932	4.30037	0.000574571	0.20929	0	2.62592					cyto_nucl 12.5, nucl 11, cyto 10, mito 3, extr 3
proteinId174143	1.98778	0.117814	-2.59678	0.0897841	-4.58456	0.0017274	2.92912	0.345898	0.0392145					nucl 19.5, cyto_nucl 14.5, cyto 6.5
proteinId174158	-0.454893	0.726915	-5.50431	0.0013454	-5.04941	0.00381281	2.38231	1.71763	0					cyto 9, mito 7, nucl 6, extr 5
proteinId17448	0.135682	0.815033	-3.86728	1.52518e-12	-4.00296	2.4354e-13	8.53328	3.95399	0.265766	KOG1864	Ubiquitin-specific protease	Posttranslational modification, protein turnover, chaperones	CELLULAR PROCESSES AND SIGNALING	nucl 16, cyto_nucl 15, cyto 10	UCH,UCH_1
proteinId174776	2.16171	0.0240714	8.69218	1.13011e-25	6.53047	7.34623e-30	3.51033	0.335807	181.732					nucl 13, mito 12
proteinId174826	-0.263058	0.911173	-2.21936	0.221095	-1.95631	0.298272	7.3397	4.65785	0.72794	KOG4442	Clathrin coat binding protein/Huntingtin interacting protein HIP1, involved in regulation of endocytosis	Intracellular trafficking, secretion, and vesicular transport	CELLULAR PROCESSES AND SIGNALING	nucl 23.5, cyto_nucl 13.5	SET
proteinId174889	1.68649	0.0810948	3.90878	3.51022e-06	2.22229	0.00135508	4.29833	0.644127	10.8251	KOG1059	Vesicle coat complex AP-3, delta subunit	Intracellular trafficking, secretion, and vesicular transport	CELLULAR PROCESSES AND SIGNALING	nucl 20, mito 6
proteinId175083	-0.337703	NA	3.8826	0.0910938	4.22031	0.0692449	0	0	1.04764					nucl 20.5, cyto_nucl 12, mito 4
proteinId175099	-0.454629	0.324813	-2.0072	3.33477e-07	-1.55257	0.000104123	19.3547	13.6891	3.44191	KOG0055	Multidrug/pheromone exporter, ABC superfamily	Secondary metabolites biosynthesis, transport and catabolism	METABOLISM	plas 18, E.R. 7	ABC_membrane,ABC_tran,SMC_N,AAA_21,ABC_ATPase,AAA_16,AAA_29,DUF258,AAA_17,AAA_25
proteinId175139	2.198	0.0497247	-1.05467	0.405771	-3.25268	0.00411135	2.06967	0.212803	0.0971885	KOG1878	Nuclear receptor coregulator SMRT/SMRTER, contains Myb-like domains	Transcription	INFORMATION STORAGE AND PROCESSING	mito 10, plas 8, extr 3, E.R. 3, cyto 2
proteinId17543	-0.0513267	0.891719	0.682047	0.016412	0.733373	0.0106686	85.1243	45.051	73.8513	KOG2190	PolyC-binding proteins alphaCP-1 and related KH domain proteins	General function prediction only	POORLY CHARACTERIZED	cyto_nucl 13, cyto 11.5, nucl 9.5, pero 6	KH_1,KH_3,KH_2
proteinId175594	2.97732	5.38579e-05	4.06015	6.02177e-09	1.08282	0.0971138	12.8987	0.778094	14.4926					extr 15, nucl 4, E.R. 3, mito_nucl 3
proteinId175732	-4.08471	8.38322e-11	-2.14555	0.000541815	1.93915	0.00224716	11.4772	106.995	24.1898	KOG2617	Citrate synthase	Energy production and conversion	METABOLISM	pero 11.5, cyto_pero 10.5, cyto 8.5, mito 6	Citrate_synt
proteinId17576	5.65746	2.14883e-05	4.36428	0.000790612	-1.29319	0.134349	5.20164	0.0290266	1.06382	KOG2043	Signaling protein SWIFT and related BRCT domain proteins	Signal transduction mechanisms	CELLULAR PROCESSES AND SIGNALING	mito_nucl 9.166, nucl 9, mito 9, cyto_nucl 7
proteinId175828	0.143465	0.765315	-6.1094	5.9635e-29	-6.25286	4.53253e-30	25.9246	11.9691	0.165026	KOG0578	p21-activated serine/threonine protein kinase	Signal transduction mechanisms	CELLULAR PROCESSES AND SIGNALING	nucl 14, cyto_nucl 12.5, cyto 7, mito 3, pero 3	Pkinase,Pkinase_Tyr,PBD,PH,Kinase-like
proteinId175841	2.80401	0.0124029	2.4271	0.0229799	-0.376911	0.725841	2.05111	0.133996	0.837972	KOG4177	Ankyrin	Cell wall/membrane/envelope biogenesis	CELLULAR PROCESSES AND SIGNALING	nucl 24.5, cyto_nucl 14	Zn_clus
proteinId17586	0.963792	0.354402	-0.927052	0.366551	-1.89084	0.0497847	5.49887	1.41192	0.730649					nucl 11, mito 9, cyto 3, extr 3
proteinId175863	3.8161	6.51936e-06	5.77064	5.27766e-13	1.95454	6.81402e-05	6.09227	0.195884	12.5394					plas 10, mito 6, nucl 4, pero 3, cyto_mito 3
proteinId175867	5.17022	0.00540273	4.88747	0.00544639	-0.28275	0.819858	2.67661	0	1.15733					extr 17, mito 4, pero 2, E.R. 2, mito_nucl 2
proteinId175890	4.19482	0.0192745	7.11718	1.18106e-05	2.92235	0.000264716	1.39945	0	5.86928					nucl 14, cyto_nucl 12.5, cyto 9, mito 4
proteinId175935	-0.98609	0.309415	-2.24276	0.0115833	-1.25667	0.180691	4.27058	4.37393	0.874203					cysk 19, nucl 5, cyto 2
proteinId175990	8.84989	3.39973e-09	6.92697	2.22125e-06	-1.92292	0.00580631	15.2646	0	2.00514	KOG0446	Vacuolar sorting protein VPS1, dynamin, and related proteins	General function prediction only	POORLY CHARACTERIZED	cyto_nucl 10.333, nucl 10, cyto 8.5, cyto_mito 6.166, cysk 4, mito 2.5	Dynamin_N,Dynamin_M,MMR_HSR1
proteinId175991	8.67247	3.48403e-09	7.59036	1.1102e-07	-1.08211	0.0796531	24.4343	0	5.89199	KOG0845	Nuclear pore complex, Nup98 component (sc Nup145/Nup100/Nup116)	Intracellular trafficking, secretion, and vesicular transport	CELLULAR PROCESSES AND SIGNALING	nucl 11, cyto_nucl 9.5, mito 6, cyto 6, extr 1, pero 1, golg 1, vacu 1
proteinId176058	-0.231045	NA	-1.08519	0.504842	-0.854146	0.609347	0.558083	0.344657	0.146999					cyto 8, nucl 7, mito 3, plas 3, extr 2, pero 1, E.R. 1, golg 1, vacu 1
proteinId176477	-1.25645	0.000486514	0.943282	0.00607466	2.19974	8.29711e-11	37.4214	45.979	90.5831	KOG0306	WD40-repeat-containing subunit of the 18S rRNA processing complex	RNA processing and modification	INFORMATION STORAGE AND PROCESSING	cyto 18, cyto_nucl 11.333, cyto_mito 11.333, nucl 3.5, mito 3.5	WD40
proteinId176765	-0.684534	0.128113	-4.3926	5.71524e-19	-3.70807	9.63178e-14	16.2007	13.4453	0.629495	KOG3894	SNARE protein Syntaxin 18/UFE1	Intracellular trafficking, secretion, and vesicular transport	CELLULAR PROCESSES AND SIGNALING	mito 11, cyto_nucl 7.5, cyto 7, nucl 6	Syntaxin-18_N,SNARE
proteinId176779	0.236592	0.610281	-0.0848171	0.84788	-0.321409	0.431703	13.7369	5.94964	5.74746	KOG2747	Histone acetyltransferase (MYST family)	Chromatin structure and dynamics	INFORMATION STORAGE AND PROCESSING	nucl 18, mito 7
proteinId17711	1.11414	0.00334108	2.0001	1.25901e-08	0.885959	0.010049	18.3495	4.3175	17.7688	KOG4324	Guanine nucleotide exchange factor	Intracellular trafficking, secretion, and vesicular transport	CELLULAR PROCESSES AND SIGNALING	nucl 21.5, cyto_nucl 12.5, mito 3	Sec2p
proteinId177126	2.97669	2.00868e-08	-0.00768348	0.998233	-2.98437	7.847e-09	14.0739	0.894289	0.910323	KOG0615	Serine/threonine protein kinase Chk2 and related proteins	Cell cycle control, cell division, chromosome partitioning	METABOLISM	cyto 9.5, cyto_nucl 9.333, cyto_pero 9.166, pero 7.5, nucl 7	Pkinase,Pkinase_Tyr
proteinId177141	0.911787	0.686938	4.5407	0.00851218	3.62892	0.0249255	0.519931	0.106046	4.79109					mito 11, cyto 4.5, plas 4, cyto_nucl 4, nucl 2.5, pero 2
proteinId177142	1.70149	0.320252	5.88811	2.33879e-05	4.18662	8.51184e-05	0.546183	0.0568666	6.01247					nucl 11.5, cyto_nucl 11.5, cyto 8.5, mito 5
proteinId177412	0.117266	0.835977	0.180753	0.706138	0.063487	0.900035	8.41495	3.9812	4.62488	KOG0132	RNA polymerase II C-terminal domain-binding protein RA4, contains RPR and RRM domains	Transcription	INFORMATION STORAGE AND PROCESSING	nucl 17, cyto 4, mito 3, plas 2, cyto_pero 2	RRM_1,RRM_5,RRM_6
proteinId177825	-2.93074	4.48194e-11	-4.54791	2.46279e-23	-1.61717	0.000726944	15.0238	59.911	2.55051	KOG0817	Acyl-CoA-binding protein	Lipid transport and metabolism	METABOLISM	mito 14, cyto 6.5, cyto_nucl 4.5, pero 2, nucl 1.5	ACBP
proteinId17785	3.46778	0.00585093	8.09547	8.44808e-13	4.62769	2.2543e-19	2.40489	0.0711669	32.099					plas 21, E.R. 3, nucl 1, mito 1, golg 1, mito_nucl 1
proteinId177934	-0.234507	0.539565	-0.566447	0.0764734	-0.331941	0.326671	50.5395	30.2994	20.8255	KOG1073	Uncharacterized mRNA-associated protein RAP55	Intracellular trafficking, secretion, and vesicular transport	CELLULAR PROCESSES AND SIGNALING	extr 10, mito 9.5, cyto_mito 6.833, nucl 4.5, cyto_nucl 4.333	LSM14,FDF
proteinId178210	3.54391	0.0647803	6.72852	7.67594e-05	3.18462	0.00151185	0.687675	0	3.64721					extr 9, mito 7, plas 5, E.R. 2, golg 2, nucl 1.5, cyto_nucl 1.5
proteinId178244	-0.976688	0.00677118	1.18355	0.000403992	2.16024	7.67543e-11	100.053	102.1	238.129					cyto_nucl 10.333, nucl 9.5, cyto_mito 8.999, mito 8.5, cyto 8
proteinId178352	2.69634	0.0157059	8.0005	3.83763e-16	5.30415	1.74195e-20	2.75914	0.168305	60.7185					nucl 9.5, cyto_nucl 8, cyto 5.5, extr 5, mito 3, pero 3
proteinId178503	0.712998	0.322264	0.936298	0.141923	0.2233	0.747288	5.24642	1.61103	3.21167	KOG3544	Collagens (type IV and type XIII), and related proteins	Extracellular structures	CELLULAR PROCESSES AND SIGNALING	cyto 7, mito 6, cyto_nucl 6, nucl 5, plas 3	Fungal_trans
proteinId178657	0.732384	0.362198	-3.26504	1.85949e-05	-3.99743	1.37404e-07	14.7354	4.40863	0.427617					nucl 20.5, cyto_nucl 13.5, cyto 5.5
proteinId178658	1.69637	0.000367164	3.58849	6.08969e-16	1.89212	2.67983e-05	53.7203	8.2751	103.88	KOG2049	Translational repressor MPT5/PUF4 and related RNA-binding proteins (Puf superfamily)	Translation, ribosomal structure and biogenesis	INFORMATION STORAGE AND PROCESSING	nucl 17.5, cyto_nucl 13, cyto 7.5	PUF
proteinId178988	6.54829	8.82495e-17	5.05923	8.19745e-11	-1.48906	0.0178242	50.6701	0.234885	9.43614					mito 22, mito_nucl 13.833, cyto_mito 11.833
proteinId179022	-0.927405	0.304646	-5.56381	2.36713e-13	-4.63641	1.6477e-09	258.89	249.094	4.80617	KOG3747	Concentrative Na+-nucleoside cotransporter CNT1/CNT2	Inorganic ion transport and metabolism	METABOLISM	plas 27	Nucleos_tra2_C,Nucleos_tra2_N
proteinId179097	1.32964	0.501575	-1.72127	0.369989	-3.05091	0.0984584	1.51386	0.261013	0.0546274	KOG1187	Serine/threonine protein kinase	Signal transduction mechanisms	CELLULAR PROCESSES AND SIGNALING	nucl 15.5, cyto_nucl 11, cyto 5.5, mito 3
proteinId179188	0.724515	0.584348	1.56814	0.156245	0.843626	0.456553	2.99601	0.872707	2.82587					mito 12, nucl 6, cyto 6, cyto_nucl 6
proteinId179756	4.80799	0.00140692	2.995	0.0441252	-1.81299	0.116988	9.74871	0.110135	1.39392					nucl 25, cyto_nucl 14.5
proteinId179833	2.79403	NA	-0.00737199	0.998233	-2.8014	0.247241	0.57214	0	0					mito 17, cyto 5, plas 3
proteinId17988	-2.68303	1.59005e-14	-3.35563	8.10653e-23	-0.672606	0.0663214	187.197	629.837	61.9461	KOG2304	3-hydroxyacyl-CoA dehydrogenase	Lipid transport and metabolism	METABOLISM	mito 18, cyto 4.5, cyto_nucl 4, nucl 2.5	3HCDH_N,3HCDH
proteinId180011	1.03842	0.136381	1.12443	0.0810814	0.0860093	0.902247	8.0774	1.99685	4.50855					mito 8, nucl 6, cyto_pero 6, cyto 5.5, pero 5.5
proteinId180101	0.0882164	0.831193	0.992712	0.00141932	0.904496	0.00382341	30.2921	14.5982	29.7751	KOG0866	Ran-binding protein RANBP3	Intracellular trafficking, secretion, and vesicular transport	CELLULAR PROCESSES AND SIGNALING	mito 17.5, mito_nucl 10.833, cyto 5.5, cyto_nucl 4.833	Ran_BP1
proteinId180116	-0.359526	0.482303	-2.90719	4.25036e-11	-2.54766	1.00293e-08	16.4825	10.7736	1.42853	KOG0845	Nuclear pore complex, Nup98 component (sc Nup145/Nup100/Nup116)	Intracellular trafficking, secretion, and vesicular transport	CELLULAR PROCESSES AND SIGNALING	nucl 15, cyto_nucl 11, mito 6, cyto 5
proteinId180163	2.11539	0.211519	4.36719	0.00263812	2.25179	0.0500133	0.846319	0.0720041	2.32321					cysk 21, cyto 3, mito 2, cyto_nucl 2	Lipocalin_5
proteinId18021	-0.238828	0.677163	4.15282	1.3116e-24	4.39165	5.10466e-30	3.45436	2.08663	38.6716					nucl 12.5, cyto_nucl 10.5, cyto 7.5, mito 5
proteinId180224	-2.04313	1.20444e-10	-1.89919	8.12234e-10	0.14394	0.688075	482.405	1034.42	281.277	KOG4040	NADH:ubiquinone oxidoreductase, NDUFB8/ASHI subunit	Energy production and conversion	METABOLISM	mito 24, cyto 1, plas 1, extr 1	NDUF_B8
proteinId180361	-0.27107	0.631583	-3.44317	8.5091e-13	-3.1721	5.88177e-11	38.7742	23.9688	2.1626					mito 10, plas 10, cyto 3, E.R. 2
proteinId18041	-0.789213	0.0644161	-0.656292	0.102834	0.132921	0.768369	16.2774	14.3584	9.27432	KOG0861	SNARE protein YKT6, synaptobrevin/VAMP syperfamily	Intracellular trafficking, secretion, and vesicular transport	CELLULAR PROCESSES AND SIGNALING	mito 10.5, mito_nucl 10.333, nucl 9, cyto_nucl 7.833, cyto 5.5	Synaptobrevin,Longin
proteinId180466	-0.534036	0.260934	1.21402	0.00304502	1.74805	1.89629e-05	61.2045	45.3436	108.67	KOG0118	FOG: RRM domain	General function prediction only	POORLY CHARACTERIZED	extr 26
proteinId18047	-0.0213712	0.969646	-0.820414	0.041899	-0.799042	0.0508791	16.1723	8.35621	4.82597	KOG2071	mRNA cleavage and polyadenylation factor I/II complex, subunit Pcf11	RNA processing and modification	INFORMATION STORAGE AND PROCESSING	nucl 13.5, cyto_nucl 13, cyto 9.5, pero 3
proteinId18059	0.131626	0.855591	5.0417	1.75808e-25	4.91008	2.96985e-30	4.6718	2.16065	75.737					plas 21, mito 2, E.R. 2
proteinId180708	-1.85216	4.90415e-06	-4.09066	1.55643e-19	-2.2385	1.5861e-06	21.4483	39.8555	2.30581	KOG3442	Uncharacterized conserved protein	Function unknown	POORLY CHARACTERIZED	mito 27	Pam16
proteinId180738	0.408692	0.309585	1.03927	0.00250517	0.63058	0.0767154	21.8766	8.35686	17.6152	KOG0207	Cation transport ATPase	Inorganic ion transport and metabolism	METABOLISM	plas 21, E.R. 4	E1-E2_ATPase,Hydrolase,HMA,HAD,Hydrolase_3
proteinId180777	7.32508	1.60139e-26	9.22333	1.4135e-42	1.89826	1.07498e-05	42.1764	0.111642	82.6649	KOG3599	Ca2+-modulated nonselective cation channel polycystin	Inorganic ion transport and metabolism	METABOLISM	nucl 22, cyto 5	Zn_clus
proteinId18083	2.1388	0.0838442	5.34326	6.82592e-07	3.20446	0.000199541	1.14503	0.109935	6.06188					mito 16, nucl 8, plas 2
proteinId180870	1.18513	0.0021097	1.52304	2.51793e-05	0.337911	0.393805	29.9197	6.68918	19.6856	KOG0519	Sensory transduction histidine kinase	Signal transduction mechanisms	CELLULAR PROCESSES AND SIGNALING	cyto 21, cyto_nucl 14, nucl 5	HAMP,HATPase_c,Response_reg,HisKA
proteinId180996	0.0690849	0.974943	0.893994	0.596402	0.824909	0.626529	0.46359	0.222211	0.470872					mito 22, cyto 3
proteinId181259	-0.653836	0.0545524	-8.17315	2.70482e-51	-7.51931	3.36326e-43	150.014	120.654	0.38047					mito 6, nucl 5, cyto 5, extr 5, cyto_nucl 5
proteinId181478	1.44498	0.0311333	1.57922	0.011795	0.134235	0.842373	8.93992	1.63764	5.08671	KOG1434	Meiotic recombination protein Dmc1	Cell cycle control, cell division, chromosome partitioning	METABOLISM	nucl 13.5, cyto_nucl 10.5, mito 6, cyto 4.5	HHH_5
proteinId181600	-2.87385	4.64343e-14	-3.48064	2.87027e-19	-0.606787	0.156945	12.142	46.0643	4.15945					nucl 10.5, cyto_nucl 9.5, cyto 7.5, extr 5, mito 4
proteinId1817	NA	NA	NA	NA	NA	NA	0	0	0					mito 14, nucl 7, cyto 4
proteinId182437	1.2747	0.124239	4.97331	1.68988e-12	3.69861	6.29088e-09	6.14495	1.25441	44.2761					mito 13, plas 7, nucl 3, E.R. 2
proteinId182659	-0.304841	0.485818	-0.111652	0.785172	0.193189	0.633822	162.765	104.327	98.5893	KOG3179	Predicted glutamine synthetase	Nucleotide transport and metabolism	METABOLISM	cyto 11.5, cyto_mito 9.166, cyto_nucl 7.833, mito 5.5, extr 5, cysk 3	GATase
proteinId182669	2.01485	0.00100154	3.76263	3.1517e-11	1.74779	0.00102968	10.8171	1.34954	19.6365	KOG4755	Predicted pyroglutamyl peptidase	Posttranslational modification, protein turnover, chaperones	CELLULAR PROCESSES AND SIGNALING	mito 16, nucl 5, cyto 4
proteinId18289	4.36177	1.11941e-05	7.70992	1.36844e-16	3.34815	3.78554e-15	9.7944	0.173513	52.9863					mito 8, extr 6, cyto 5.5, cyto_nucl 5.5, nucl 4.5
proteinId182946	1.73975	0.0130681	1.56244	0.0182666	-0.177312	0.811919	6.59023	0.975596	3.02764					nucl 22, cyto 3	Fungal_trans_2,Zn_clus
proteinId183037	-1.22504	0.000387823	-4.54831	4.75114e-43	-3.32328	2.70803e-23	239.548	290.789	12.4378					mito 18, nucl 5, cyto 4	DUF4452
proteinId183259	0.0310642	0.936252	1.31867	2.52027e-06	1.2876	5.14683e-06	58.2887	29.0918	74.3624	KOG0694	Serine/threonine protein kinase	Signal transduction mechanisms	CELLULAR PROCESSES AND SIGNALING	nucl 15.5, cyto_nucl 11, cyto 5.5, mito 2, pero 2	Pkinase,Pkinase_Tyr,HR1,C1_1
proteinId183385	-0.630403	0.330419	-3.82427	2.97729e-10	-3.19387	1.99433e-07	27.1984	21.7147	1.50095					nucl 12, cyto_nucl 11, cyto 8, mito 3, plas 2, pero 2
proteinId183404	2.46374	0.0768097	4.23372	0.000642	1.76998	0.0808306	1.58805	0.116023	2.96357	KOG0613	Projectin/twitchin and related proteins	Cytoskeleton	CELLULAR PROCESSES AND SIGNALING	extr 18, mito 4, plas 2, E.R. 2, mito_nucl 2
proteinId183660	-0.275631	NA	0.0468376	0.998233	0.322468	0.896866	0.162119	0.111615	0.121464					nucl 11.5, cyto_nucl 9, cyto 5.5, mito 4, plas 3
proteinId183719	-0.289776	0.722832	2.64905	1.32028e-05	2.93882	9.91026e-07	2.94047	1.83223	12.2133	KOG2709	Uncharacterized conserved protein	Function unknown	POORLY CHARACTERIZED	cyto 22.5, cyto_nucl 12, mito 3	Senescence
proteinId183720	-1.69326	0.0422519	3.16267	2.31711e-06	4.85593	6.12391e-12	1.02882	1.78995	17.047					mito 12, cyto 7, nucl 5, extr 2
proteinId183858	3.00226	0.00131385	0.36363	0.732009	-2.63863	0.0026714	6.7971	0.410006	0.546919	KOG1721	FOG: Zn-finger	General function prediction only	POORLY CHARACTERIZED	nucl 24.5, cyto_nucl 13	zf-C2H2_4,zf-C2H2
proteinId183863	2.93062	0.0249889	4.54047	0.000136182	1.60985	0.12962	3.65559	0.204661	6.30521					plas 19, mito 5, E.R. 2
proteinId183911	1.07791	0.0713723	1.88166	0.000475891	0.803755	0.128846	8.52444	2.04824	7.88736					mito 9, cyto 7, mito_nucl 7, nucl 5, extr 5
proteinId183921	0.293767	0.482773	-0.786384	0.024874	-1.08015	0.00204073	122.883	50.8596	29.9783	KOG3791	Predicted RNA-binding protein involved in translational regulation	Signal transduction mechanisms	CELLULAR PROCESSES AND SIGNALING	nucl 23, cyto_nucl 13.5	SAM_2,SAM_1
proteinId184156	0.947085	0.101682	-1.63767	0.00215363	-2.58476	9.3895e-07	19.4496	5.06044	1.6341	KOG3689	Cyclic nucleotide phosphodiesterase	Signal transduction mechanisms	CELLULAR PROCESSES AND SIGNALING	plas 10, mito 5, cyto 5, cyto_mito 5	PDEase_I
proteinId184608	-1.4775	1.45875e-06	-1.21891	4.58966e-05	0.258585	0.438282	17.5963	25.1352	10.9696	KOG4155	FOG: WD40 repeat	General function prediction only	POORLY CHARACTERIZED	nucl 11, mito 8, cyto 6	WD40,Nup160
proteinId184657	-2.29763	9.42804e-07	-1.07882	0.0193817	1.21882	0.00969162	12.3393	31.3113	15.0043	KOG2915	tRNA(1-methyladenosine) methyltransferase, subunit GCD14	Translation, ribosomal structure and biogenesis	INFORMATION STORAGE AND PROCESSING	mito 27	GCD14,Methyltransf_18,Methyltransf_31,Methyltransf_26,Methyltransf_11,Methyltransf_23
proteinId184669	-0.175124	0.815119	-1.39962	0.0154247	-1.2245	0.0387702	60.742	34.3649	13.0803	KOG2524	Cobyrinic acid a,c-diamide synthase	Coenzyme transport and metabolism	METABOLISM	cysk 14, nucl 5, cyto 4, pero 4, cyto_pero 4	DUF2419
proteinId184779	-0.807952	0.0493254	-8.37591	5.6606e-53	-7.56796	4.71336e-43	136.214	123.715	0.33857					nucl 20.5, cyto_nucl 11, mito 6
proteinId184786	0.0465349	0.929999	2.86907	1.7942e-14	2.82254	5.85719e-14	81.647	40.9927	310.089					plas 14, mito 8, E.R. 2, vacu 2
proteinId184883	3.90692	0.0330842	7.30277	9.10698e-06	3.39585	0.000190075	1.23573	0	7.27796					nucl 18, mito 5, cyto 3
proteinId184898	2.69688	0.0586126	1.23753	0.390304	-1.45935	0.250685	4.69815	0.308035	0.850074					nucl 9, mito 9, mito_nucl 9
proteinId184918	2.52312	0.128516	4.47565	0.00215757	1.95253	0.0919446	1.55789	0.0897549	3.45768					mito 25
proteinId18502	1.54842	0.00802479	-3.03775	2.84782e-07	-4.58617	4.63373e-15	51.4911	8.83261	1.03798					nucl 18, cyto_nucl 15.5, cyto 9
proteinId185038	0.0897318	0.878582	-0.197952	0.691298	-0.287684	0.55806	6.06309	2.91105	2.59909	KOG0391	SNF2 family DNA-dependent ATPase	General function prediction only	POORLY CHARACTERIZED	nucl 18, mito 7	Fungal_trans_2,Zn_clus
proteinId185176	2.26889	NA	2.16671	0.358978	-0.102174	0.968947	0.329863	0	0.161725					mito 10, cyto 7.5, cyto_pero 4.5, cysk 4, nucl 3
proteinId185180	1.48219	0.000823488	0.943661	0.028808	-0.538534	0.225525	53.0552	9.68544	19.2132					mito 11.5, cyto_mito 9.333, nucl 7.5, cyto_nucl 7.333, cyto 6
proteinId185359	1.41872	0.00628435	6.49392	9.41877e-45	5.0752	3.60697e-32	23.3666	4.45877	431.759					plas 6, cyto_mito 6, mito 5.5, cyto 5.5, extr 4, E.R. 3
proteinId185437	-0.180336	0.684458	1.27862	0.000183138	1.45895	1.78255e-05	24.8279	14.5201	36.1431	KOG4672	Uncharacterized conserved low complexity protein	Function unknown	POORLY CHARACTERIZED	nucl 22, mito 2, cyto 2, cyto_mito 2	Wbp11
proteinId185547	0.54459	0.700098	4.13045	6.16444e-05	3.58586	7.24085e-05	0.550086	0.181769	3.76971					nucl 17, cyto_nucl 12, cyto 5, pero 4
proteinId185588	-0.306065	0.551587	-4.04317	3.69175e-19	-3.73711	2.05259e-16	56.1848	35.8216	2.16774	KOG1721	FOG: Zn-finger	General function prediction only	POORLY CHARACTERIZED	nucl 24, cyto_nucl 14.5	zf-C2H2,zf-H2C2_2
proteinId185600	0.900351	NA	0.359052	0.884861	-0.541299	0.818219	0.935497	0.209499	0.310936					extr 9, mito 8, cyto 5, nucl 4
proteinId185658	0.343401	0.765631	2.03657	0.0200755	1.69317	0.0453557	1.31815	0.526771	2.31067					extr 13, cyto_nucl 5.333, cyto_mito 5.333, cyto 5, nucl 4.5, mito 4.5
proteinId185659	2.9681	5.15775e-07	2.64738	4.83826e-06	-0.320716	0.565597	24.6458	1.55377	10.3253					nucl 16, cyto_nucl 11, cyto 4, mito 3, pero 3
proteinId185800	-0.494736	0.228791	3.87903	3.25257e-29	4.37377	1.59047e-36	82.7484	59.4629	909.478	KOG0131	Splicing factor 3b, subunit 4	RNA processing and modification	INFORMATION STORAGE AND PROCESSING	nucl 22, mito 3	Zn_clus
proteinId185838	-0.554008	0.711042	0.344775	0.79389	0.898783	0.477167	0.809747	0.630378	0.824043					nucl 21, cyto_nucl 13.5, cyto 4
proteinId185914	-0.327527	0.871288	1.1913	0.456476	1.51883	0.338721	0.449869	0.30458	0.784348					nucl 22, cyto_nucl 13.5, cyto 3
proteinId185999	-0.441179	0.830798	1.77218	0.258754	2.21336	0.150434	0.46885	0.339185	1.39577					mito 21, cyto 3, plas 1, pero 1, golg 1
proteinId186154	0.358091	NA	-1.33954	0.585642	-1.69763	0.496983	0.205939	0.0712853	0					mito 17, extr 4, cyto 3, nucl 2
proteinId186364	0.0590302	0.901202	1.97217	1.31236e-08	1.91314	3.86069e-08	12.2799	6.02208	24.239	KOG0309	Conserved WD40 repeat-containing protein	Function unknown	POORLY CHARACTERIZED	nucl 13, cyto 7.5, cyto_mito 6, mito 3.5	WD40
proteinId186647	5.28123	0.00312964	5.68028	0.00073409	0.399046	0.705146	2.1701	0	1.50431					mito 14, nucl 8.5, cyto_nucl 6.5, cyto 3.5
proteinId187079	-2.18519	NA	-0.822323	0.70472	1.36287	0.541791	0.0667449	0.270848	0.135485					extr 10, mito 6, cyto 5.5, cyto_nucl 4.5, nucl 2.5
proteinId187090	4.30885	9.38454e-07	5.6666	1.42441e-11	1.35775	0.0354952	11.2425	0.248632	15.552					mito 18, nucl 5.5, cyto_nucl 4.5, cyto 2.5
proteinId187376	0.365263	0.82239	2.78024	0.020677	2.41498	0.0312086	0.961337	0.365454	2.98267					mito 23, nucl 1, cyto 1, plas 1, cyto_nucl 1, E.R. 1
proteinId187377	0.173434	0.936531	-0.477048	0.801054	-0.650482	0.725503	0.8311	0.370967	0.260466	KOG4157	beta-1,6-N-acetylglucosaminyltransferase, contains WSC domain	Carbohydrate transport and metabolism	METABOLISM	extr 9, mito 7, plas 6, E.R. 3
proteinId187409	1.17878	0.0350475	-0.731116	0.185517	-1.90989	0.000267165	7.46284	1.66433	1.00884	KOG0519	Sensory transduction histidine kinase	Signal transduction mechanisms	CELLULAR PROCESSES AND SIGNALING	plas 13, E.R. 6, nucl 2, extr 2, mito 1, cyto 1, pero 1, vacu 1, cyto_mito 1, cyto_pero 1	Response_reg,HATPase_c,HisKA
proteinId187452	0.104518	0.871307	2.39715	3.6682e-07	2.29263	1.06534e-06	15.32	7.34549	40.4625	KOG1577	Aldo/keto reductase family proteins	General function prediction only	POORLY CHARACTERIZED	mito 15.5, cyto_mito 12.833, cyto 9, cyto_nucl 6.333	Aldo_ket_red
proteinId187453	0.944873	0.0704593	0.849256	0.0832895	-0.0956172	0.860097	5.87165	1.55555	2.86978	KOG1216	von Willebrand factor and related coagulation proteins	Extracellular structures	CELLULAR PROCESSES AND SIGNALING	nucl 17.5, cyto_nucl 10.5, mito 7
proteinId187504	-1.60954	0.00176825	-0.928598	0.0624004	0.680944	0.190216	49.9162	78.4512	42.0593	KOG0409	Predicted dehydrogenase	General function prediction only	POORLY CHARACTERIZED	mito 17, cyto 10	NAD_binding_2,NAD_binding_11
proteinId18758	-0.158374	0.772456	0.539624	0.21934	0.697997	0.110897	7.40859	4.24713	6.29687					nucl 20, cyto_nucl 14.5, cyto 7	YL1,YL1_C
proteinId187893	-2.23811	4.1085e-07	-8.72989	1.14714e-81	-6.49178	3.09148e-45	405.998	1010.29	2.26183					mito 10, cyto 9.5, cyto_nucl 7.5, nucl 4.5	Pyridox_oxase_2
proteinId188018	2.90724	NA	-1.52036	0.514199	-4.4276	0.0392094	0.98112	0.044122	0					extr 15, E.R. 5, plas 3, mito 2, cyto 2, cyto_mito 2
proteinId188038	0.89681	NA	1.29112	0.58823	0.394313	0.881139	0.10548	0	0.103645					extr 6, cysk 6, nucl 5.5, cyto_nucl 5, mito 4, cyto 3.5
proteinId188069	1.52216	0.0317209	2.10925	0.00120474	0.587084	0.376481	7.44813	1.29143	5.86186					cyto 9.5, cyto_nucl 9.333, cyto_pero 7.166, nucl 7, pero 3.5, mito 3
proteinId188072	7.49743	2.85736e-05	2.04787	0.296633	-5.44957	6.80278e-06	4.13331	0	0.0408981					nucl 18, cyto_nucl 13, cyto 6
proteinId188087	-1.87271	4.03819e-06	-0.5508	0.178911	1.32191	0.000970291	27.6814	53.0139	36.9197	KOG4526	Predicted membrane protein	Function unknown	POORLY CHARACTERIZED	mito 23, cyto 3	DUF1279
proteinId188362	-1.1561	0.0066991	-0.147424	0.742606	1.00868	0.0137503	17.5422	20.1548	18.568	KOG2362	Uncharacterized Fe-S protein	General function prediction only	POORLY CHARACTERIZED	extr 10, cyto 6, mito 4, cyto_nucl 4, E.R. 4	MOSC,MOSC_N
proteinId188383	0.553725	0.156602	2.71915	5.23807e-16	2.16542	1.01113e-10	24.0298	8.37144	56.769	KOG1812	Predicted E3 ubiquitin ligase	Posttranslational modification, protein turnover, chaperones	CELLULAR PROCESSES AND SIGNALING	nucl 10.5, cyto_nucl 7.5, mito 7, cyto 3.5, plas 2, pero 2	CUE
proteinId188484	0.0192434	0.99152	-1.97142	0.144594	-1.99066	0.144307	1.79025	0.908041	0.208053					mito 11, extr 10, cyto 2, plas 2
proteinId18850	-0.121856	0.838563	-1.52972	0.000848363	-1.40786	0.00243111	29.2606	16.2155	5.68062	KOG1444	Nucleotide-sugar transporter VRG4/SQV-7	Carbohydrate transport and metabolism	METABOLISM	plas 25	UAA,TPT
proteinId189086	1.88683	3.15047e-05	2.9195	1.00579e-11	1.03267	0.0188114	41.1217	5.66764	44.4513					nucl 14.5, mito_nucl 12, mito 8.5, cyto 2
proteinId189240	-0.123788	0.800283	3.72419	4.50011e-25	3.84797	1.10581e-26	14.4846	8.17449	111.959					nucl 21.5, cyto_nucl 13, cyto 3.5	Fungal_trans_2,Zn_clus
proteinId189288	3.08136	0.132228	6.07376	0.000666976	2.9924	0.0113262	0.404923	0	1.89493					cyto 13, cyto_nucl 12, nucl 7, cysk 6
proteinId189363	-0.336544	0.645844	-2.10729	0.000338919	-1.77075	0.00313057	10.4375	6.8062	1.55645	KOG2058	Ypt/Rab GTPase activating protein	Intracellular trafficking, secretion, and vesicular transport	CELLULAR PROCESSES AND SIGNALING	nucl 20.5, cyto_nucl 13.5, cyto 5.5	RabGAP-TBC
proteinId189371	1.55108	0.0161826	5.89741	6.80933e-26	4.34634	3.26462e-22	7.22218	1.21146	79.2086					cyto 11, cyto_nucl 8, mito 7, extr 4, nucl 3
proteinId189843	0.888719	0.121442	-0.446659	0.420165	-1.33538	0.011055	24.5408	6.69138	4.96182	KOG1861	Leucine permease transcriptional regulator	Transcription	INFORMATION STORAGE AND PROCESSING	mito 15.5, mito_nucl 12, nucl 7.5, cyto 3	SAC3_GANP
proteinId189878	2.30641	0.0696085	3.18383	0.0057763	0.877416	0.386202	1.69269	0.14889	1.67763					extr 10, mito 7, cyto_nucl 5, nucl 4.5, cyto 4.5
proteinId189900	1.5275	0.110533	2.10911	0.0149059	0.581615	0.49953	6.25253	1.05458	4.97471					nucl 10, mito 9, cyto_nucl 9, cyto 6
proteinId189910	3.33675	0.000585948	5.60105	4.4852e-10	2.2643	4.62343e-05	4.38021	0.189709	11.2835					mito 10, plas 7, E.R. 3, pero 2, golg 2, cyto 1, extr 1, vacu 1
proteinId189916	0.573412	0.298959	0.0567297	0.927169	-0.516682	0.313008	72.1779	24.3131	25.8803	KOG2084	Predicted histone tail methylase containing SET domain	Chromatin structure and dynamics	INFORMATION STORAGE AND PROCESSING	extr 16, mito 5, golg 3, E.R. 2	SET
proteinId189930	2.34343	0.0148004	-0.502917	0.645778	-2.84635	0.00236259	10.8446	1.01154	0.716515					nucl 16.5, cyto_nucl 10.5, mito 6, cyto 3.5
proteinId190140	3.88865	2.33938e-09	7.06839	6.66533e-30	3.17974	3.8113e-09	34.987	1.10039	167.577					plas 17, mito 5, E.R. 3
proteinId190206	-0.760443	0.492032	-3.76957	0.000904039	-3.00912	0.00966626	3.2103	2.8105	0.170403					mito 10, plas 6, cyto_mito 6, nucl 4
proteinId190317	14.0769	1.24054e-110	5.72799	1.86645e-19	-8.34894	6.37293e-54	39833.5	0.973754	59.2157	KOG3587	Galectin, galactose-binding lectin	Extracellular structures	CELLULAR PROCESSES AND SIGNALING	cyto_nucl 12.333, nucl 12, cyto 8.5, cyto_mito 6.832, mito 3.5	Gal-bind_lectin
proteinId190632	1.70529	0.00699374	-1.61363	0.0108521	-3.31892	6.31346e-08	10.0204	1.55692	0.511105					plas 20, mito 4, E.R. 2, cyto_mito 2, mito_nucl 2
proteinId190852	1.61283	0.075327	-0.0281261	0.992091	-1.64096	0.0539626	4.26994	0.690679	0.690988					extr 13, plas 7, mito 6
proteinId190886	3.73852	7.62489e-07	2.61216	0.000511108	-1.12636	0.0816738	12.4009	0.437362	2.89309					cyto 10, mito 7, extr 4, nucl 3, plas 2
proteinId190897	4.34051	2.85621e-08	3.43642	7.92901e-06	-0.90409	0.188004	11.1506	0.249256	3.05854	KOG0509	Ankyrin repeat and DHHC-type Zn-finger domain containing proteins	General function prediction only	POORLY CHARACTERIZED	cyto 13, extr 6, mito 5, nucl 2	Ank_2,Ank_3,Ank,Ank_4,Ank_5
proteinId190911	5.11134	9.41005e-14	4.41317	7.49554e-11	-0.698171	0.14518	28.8665	0.391618	9.32759					mito 14, plas 7, cyto_mito 7
proteinId190928	0.232821	0.637672	-2.71633	9.0315e-12	-2.94915	1.51614e-13	49.3623	21.2901	3.2652	KOG4773	NADPH oxidase	Energy production and conversion	METABOLISM	mito 12, nucl 8.5, cyto_nucl 6.5, cyto 3.5	SH3_1,SH3_9,SH3_2,PX,PB1
proteinId191047	-2.32691	0.000380782	-4.87431	1.56557e-13	-2.5474	0.0001877	11.9922	32.5678	1.05319					mito 8, nucl 7, plas 6, cyto_mito 6
proteinId191621	-0.846332	0.0731607	-0.385965	0.39702	0.460367	0.321365	37.0612	34.522	26.9534	KOG3183	Predicted Zn-finger protein	General function prediction only	POORLY CHARACTERIZED	nucl 15, cyto 7, mito 4, cyto_pero 4	zf-AN1
proteinId191770	-1.61784	5.63822e-05	-2.43092	1.8241e-09	-0.813078	0.0604834	8.21114	13.0659	2.44212					plas 12, mito 8, cyto 3, nucl 2
proteinId192142	-1.47255	0.17035	-2.20961	0.0223563	-0.737066	0.486297	4.46311	6.76507	1.36495	KOG1674	Cyclin	General function prediction only	POORLY CHARACTERIZED	nucl 14, mito 9, cyto_nucl 9	Cyclin
proteinId192231	2.28257	3.60407e-06	6.68464	3.63344e-48	4.40207	1.34464e-27	5.70364	0.578974	63.8765	KOG1216	von Willebrand factor and related coagulation proteins	Extracellular structures	CELLULAR PROCESSES AND SIGNALING	mito 10, extr 7, mito_nucl 7, nucl 4, plas 4
proteinId192247	0.786755	0.284156	-3.19272	1.9335e-05	-3.97948	7.58967e-08	4.78335	1.40772	0.142608	KOG1844	PHD Zn-finger proteins	General function prediction only	POORLY CHARACTERIZED	nucl 22, cyto_nucl 14.5, cyto 5	PHD
proteinId192395	0.207868	0.773187	1.25845	0.0241736	1.05058	0.0545193	4.05485	1.79678	4.4419					plas 24, E.R. 3
proteinId192407	-0.394396	0.759984	-0.33203	0.769958	0.0623666	0.95953	2.18922	1.51065	1.20953					plas 23, E.R. 2, vacu 2
proteinId192446	0.0449159	0.924141	7.00384	3.2368e-106	6.95892	4.21162e-111	30.9954	15.4478	2072.48					plas 15, extr 5, E.R. 3, mito 1, cyto 1, golg 1, vacu 1, cyto_mito 1
proteinId192458	-0.670007	0.077322	-1.71032	7.00329e-07	-1.04031	0.00336614	21.225	17.2472	5.34956	KOG0598	Ribosomal protein S6 kinase and related proteins	General function prediction only	POORLY CHARACTERIZED	nucl 13.5, cyto_nucl 13, cyto 9.5, pero 2	Pkinase,Pkinase_Tyr,Pkinase_C,Kinase-like
proteinId192505	-1.44109	0.104994	-3.97054	2.25377e-05	-2.52945	0.00924476	3.81247	5.44048	0.31635	KOG1703	Adaptor protein Enigma and related PDZ-LIM proteins	Cytoskeleton	CELLULAR PROCESSES AND SIGNALING	mito 12, extr 8, mito_nucl 8
proteinId192680	-0.170539	0.73985	-0.744208	0.0665538	-0.573669	0.172764	60.0783	35.09	21.2462	KOG1216	von Willebrand factor and related coagulation proteins	Extracellular structures	CELLULAR PROCESSES AND SIGNALING	extr 21, plas 3, E.R. 2
proteinId19308	0.186511	0.606319	0.371597	0.220265	0.185086	0.566943	37.2894	16.7523	22.1054	KOG0162	Myosin class I heavy chain	Cytoskeleton	CELLULAR PROCESSES AND SIGNALING	mito 12.5, cyto_mito 9, nucl 6, cyto 4.5, pero 4	Myosin_head,Myosin_TH1,SH3_1,SH3_9,SH3_2
proteinId19324	-0.180765	0.684882	0.247476	0.511332	0.428241	0.248855	16.9843	9.79988	11.8867	KOG3662	Cell division control protein/predicted DNA repair exonuclease	Replication, recombination and repair	INFORMATION STORAGE AND PROCESSING	plas 15, mito 6, E.R. 3, cyto_mito 3	Metallophos
proteinId193330	-1.82101	7.80216e-06	-3.49504	3.34508e-18	-1.67402	5.37106e-05	23.9411	43.7996	3.91009	KOG0737	AAA+-type ATPase	Posttranslational modification, protein turnover, chaperones	CELLULAR PROCESSES AND SIGNALING	mito 12.5, cyto_mito 12.5, cyto 11.5	AAA,AAA_14,AAA_22,AAA_16,AAA_17,AAA_5
proteinId193419	3.67415	NA	3.16349	0.133249	-0.51066	0.795806	0.698711	0	0.241737					mito 7, extr 7, cyto 5, pero 3, plas 2, E.R. 2
proteinId193437	-0.74916	0.0169412	-2.32746	9.16439e-16	-1.5783	8.23624e-08	28.2929	24.3652	4.92845	KOG0613	Projectin/twitchin and related proteins	Cytoskeleton	CELLULAR PROCESSES AND SIGNALING	nucl 19.5, cyto_nucl 14, cyto 7.5	SH3_1,SH3_9
proteinId193490	1.72652	0.00221709	-0.278024	0.639943	-2.00454	0.000190582	44.5804	6.70321	5.66254	KOG3815	Transcription factor Doublesex	Transcription	INFORMATION STORAGE AND PROCESSING	nucl 13.5, cyto_nucl 9, mito 7, cyto 3.5	NDT80_PhoG
proteinId193519	3.42149	8.25593e-05	6.33911	4.25988e-15	2.91762	7.78696e-09	5.10096	0.205538	20.5092					plas 10, mito 6, extr 4, nucl 3, cyto_mito 3
proteinId193527	4.01749	0.000151102	5.82508	5.04022e-09	1.8076	0.0162911	6.54001	0.163783	12.2777					mito 17, extr 5, nucl 3
proteinId193564	-0.467295	0.275003	-4.24891	2.96068e-22	-3.78161	9.50885e-18	26.0115	18.497	0.965729	KOG2747	Histone acetyltransferase (MYST family)	Chromatin structure and dynamics	INFORMATION STORAGE AND PROCESSING	nucl 13.5, cyto_nucl 12.5, cyto 10.5
proteinId193997	0.344574	0.65368	-0.585695	0.374008	-0.930269	0.150798	5.9501	2.39519	1.63163	KOG2043	Signaling protein SWIFT and related BRCT domain proteins	Signal transduction mechanisms	CELLULAR PROCESSES AND SIGNALING	nucl 19, cyto_nucl 12, mito 5
proteinId194096	-0.166075	0.877491	-6.33367	7.18404e-05	-6.16759	0.000129272	6.47321	3.7435	0					mito 17, extr 4, cyto_nucl 3, nucl 2.5, cyto 2.5
proteinId1941	5.50861	0.00131054	6.60424	4.15853e-05	1.09562	0.218245	3.17735	0	3.66009					extr 11, golg 8, E.R. 4, mito 1, plas 1, pero 1, vacu 1
proteinId194103	2.67315	0.218166	5.55971	0.00279322	2.88656	0.031419	0.262714	0	1.18669					mito 10, cyto 6, plas 4, pero 3, E.R. 2
proteinId194212	0.438784	0.391882	-4.13198	5.27393e-15	-4.57076	4.54416e-18	41.3939	15.5804	0.852835					mito 13, nucl 12, cyto_nucl 7.5
proteinId194253	2.93311	4.52648e-10	0.566531	0.267422	-2.36658	1.50845e-07	20.0843	1.31055	1.99329	KOG1840	Kinesin light chain	Cytoskeleton	CELLULAR PROCESSES AND SIGNALING	nucl 8.5, cyto_nucl 8.5, cyto 7.5, mito 5, pero 3	TPR_12,TPR_10,TPR_1,TPR_7,TPR_2,TPR_11,TPR_14,TPR_16,NB-ARC,AAA_22
proteinId194684	7.38507	6.21005e-21	4.79767	8.94299e-10	-2.5874	0.000142633	98.5925	0.247375	8.08924	KOG1040	Polyadenylation factor I complex, subunit, Yth1 (CPSF subunit)	RNA processing and modification	INFORMATION STORAGE AND PROCESSING	cysk 12, mito 5, cyto 5, cyto_mito 5	Methyltransf_23
proteinId194781	-1.15159	0.024441	-6.21985	5.98667e-17	-5.06825	1.6433e-11	9.53314	11.0149	0.128063	KOG2084	Predicted histone tail methylase containing SET domain	Chromatin structure and dynamics	INFORMATION STORAGE AND PROCESSING	nucl 11.5, cyto_nucl 10.5, cyto 8.5, mito 6
proteinId194821	4.29665	2.11365e-16	5.19505	2.64922e-24	0.898402	0.0737192	27.0219	0.681562	26.9631	KOG0101	Molecular chaperones HSP70/HSC70, HSP70 superfamily	Posttranslational modification, protein turnover, chaperones	CELLULAR PROCESSES AND SIGNALING	mito 14, nucl 5, cyto 5, cyto_nucl 5	HSP70
proteinId194972	1.92969	0.309925	5.16917	0.00117604	3.23948	0.0224907	0.706244	0.0611162	4.40184					mito 16, cyto 4, nucl 3, plas 2, extr 2, cyto_pero 2
proteinId194999	3.14432	3.95958e-08	5.66808	1.60167e-25	2.52376	4.27938e-09	9.56112	0.519361	29.0913	KOG2510	SWI-SNF chromatin-remodeling complex protein	Chromatin structure and dynamics	INFORMATION STORAGE AND PROCESSING	nucl 21, cyto_nucl 13, mito 3, cyto 3
proteinId195008	4.90844	0.00958374	4.8308	0.00672187	-0.0776461	0.954361	2.51414	0	1.24695					cyto_nucl 8.333, cyto 8, nucl 7.5, extr 7, cyto_mito 6.333, mito 3.5	zf-RING_5
proteinId195061	3.15942	0.149565	4.56144	0.0194773	1.40202	0.381469	0.766671	0	1.19196					mito 14.5, cyto_mito 10.333, nucl 6.5, cyto_nucl 6.333, cyto 5
proteinId195067	-1.80721	0.0034221	0.738953	0.222627	2.54616	1.15498e-05	66.8022	123.159	211.172					plas 13, mito 6, nucl 5, cyto 1, pero 1, E.R. 1, cyto_pero 1
proteinId195148	-0.345153	0.84117	-4.48304	0.0170799	-4.13789	0.0307535	0.977052	0.653988	0					mito 18, nucl 6, cyto 2.5
proteinId195419	3.4488	0.0848153	6.09009	0.000607798	2.64129	0.0284815	0.563897	0	2.06474					plas 8, cyto 5.5, mito 5, cyto_nucl 4.5, extr 3, nucl 2.5
proteinId195598	0.207953	0.551365	-3.17782	1.32475e-25	-3.38577	6.74133e-29	49.5422	21.9346	2.44461	KOG0384	Chromodomain-helicase DNA-binding protein	Transcription	INFORMATION STORAGE AND PROCESSING	nucl 22, cyto_nucl 13.5, cyto 3
proteinId195633	-0.685034	0.254527	-0.251229	0.662819	0.433806	0.449236	7.62293	6.21406	5.31777	KOG1178	Non-ribosomal peptide synthetase/alpha-aminoadipate reductase and related enzymes	Secondary metabolites biosynthesis, transport and catabolism	METABOLISM	cyto 17, cysk 9	AMP-binding,NAD_binding_4,PP-binding,Epimerase
proteinId195752	1.55958	0.0942885	3.44662	2.55583e-05	1.88703	0.0113088	2.53723	0.425326	5.12298					mito 15, pero 5, nucl 3, cyto 2, plas 2
proteinId195757	-0.548619	0.763262	1.61444	0.251523	2.16306	0.118679	0.314918	0.247086	0.866981					mito 14.5, mito_nucl 12.333, nucl 9, cyto_nucl 6.333
proteinId195768	0.826242	0.456016	2.45486	0.00693947	1.62862	0.0594836	1.71713	0.48402	2.88627					mito 13, extr 5, plas 4, cyto 3
proteinId195774	1.26802	0.20327	3.01155	0.000418576	1.74353	0.0223254	1.64902	0.335021	2.99362					nucl 16.5, cyto_nucl 11, cyto 4.5, extr 4
proteinId196263	-1.20512	0.00446181	-0.845994	0.0366022	0.359126	0.411139	114.381	134.927	76.4021	KOG2533	Permease of the major facilitator superfamily	Carbohydrate transport and metabolism	METABOLISM	plas 25	MFS_1
proteinId1963	-0.996385	0.00131282	-0.304532	0.328419	0.691853	0.02284	17.2741	17.6261	14.5524	KOG0642	Cell-cycle nuclear protein, contains WD-40 repeats	Cell cycle control, cell division, chromosome partitioning	METABOLISM	nucl 19, cyto_nucl 13.5, cyto 6	Striatin,WD40
proteinId196336	3.21097	0.0813646	2.47384	0.156989	-0.737131	0.652805	1.31602	0.0430427	0.398757					mito 16, nucl 6, cyto 5
proteinId196486	1.03832	0.000343276	2.85349	3.0471e-26	1.81517	2.47843e-11	220.134	54.9096	408.658					nucl 21, cyto_nucl 14.5, cyto 6
proteinId19658	0.948139	0.0285122	0.445457	0.289282	-0.502683	0.237473	65.7761	17.1864	24.0402	KOG2958	Galactose-1-phosphate uridylyltransferase	Energy production and conversion	METABOLISM	nucl 13, cyto 5.5, cyto_mito 5.5, mito 4.5, pero 2	GalP_UDP_transf,GalP_UDP_tr_C
proteinId19662	0.249589	0.748447	0.869822	0.159898	0.620233	0.337374	11.4722	4.92019	9.36888	KOG3322	Ribonucleases P/MRP protein subunit	RNA processing and modification	INFORMATION STORAGE AND PROCESSING	mito 11, nucl 10.5, cyto_nucl 8, cyto 4.5	POP1,POPLD
proteinId196718	4.42912	2.80446e-07	1.93579	0.0241686	-2.49333	0.0032903	110.693	2.41384	9.98866	KOG1269	SAM-dependent methyltransferases	General function prediction only	POORLY CHARACTERIZED	cyto 13.5, cyto_nucl 9.5, cysk 6, nucl 4.5	Methyltransf_23,Methyltransf_31,Methyltransf_11,Methyltransf_18,Methyltransf_12
proteinId196981	2.71629	0.0002729	3.58169	3.61183e-07	0.865396	0.242432	20.5904	1.55421	20.2705					nucl 11.5, cyto_nucl 9.5, cysk 7, cyto 6.5	Methyltransf_23
proteinId197046	2.35863	0.0936195	0.870571	0.544715	-1.48806	0.245419	2.98996	0.253239	0.515834					mito 12, extr 8, nucl 3, cyto 2, pero 2, cyto_pero 2
proteinId197198	-2.56337	0.000332166	-7.24546	4.0429e-25	-4.68209	4.59499e-11	65.7393	213.954	1.26079					cysk 12, pero 5, cyto 4.5, cyto_nucl 4.5, nucl 3.5	Methyltransf_23,Methyltransf_18,Methyltransf_31,Methyltransf_11
proteinId197334	-2.55507	0.0283348	-6.32411	0.000260562	-3.76904	0.0383097	0.833305	2.80266	0					nucl 9.5, cyto_nucl 9, cyto 7.5, cysk 4, pero 3	Methyltransf_23
proteinId197345	-3.86379	0.0273268	-1.13935	0.45829	2.72443	0.115413	0.0532611	0.702079	0.299443					mito 8, cyto 6, E.R. 4, cyto_pero 4, plas 3
proteinId197371	-2.45481	0.0155421	-0.597783	0.547212	1.85703	0.0603098	0.9578	2.97032	1.97923					cyto 14.5, cyto_nucl 8.5, mito 6, plas 2, pero 2
proteinId197489	-0.00211704	0.997567	2.34518	1.64385e-06	2.34729	1.86461e-06	40.747	20.9297	110.634					cyto 12, cyto_nucl 10.833, nucl 8.5, cyto_pero 7.333, mito 4	Methyltransf_23,Methyltransf_11
proteinId197748	1.44204	0.121119	3.55049	1.20655e-05	2.10845	0.00646137	4.09079	0.743601	9.60118					mito 23, nucl 2
proteinId197749	0.936481	0.150123	-0.524788	0.410637	-1.46127	0.0147066	8.86426	2.36476	1.67948	KOG1181	FOG: Low-complexity	Function unknown	POORLY CHARACTERIZED	nucl 15, cyto_nucl 10.5, mito 8, cyto 4
proteinId198366	0.248129	0.715668	-2.19124	8.94755e-05	-2.43936	1.24089e-05	8.15782	3.56223	0.772317	KOG2806	Chitinase	Carbohydrate transport and metabolism	METABOLISM	extr 8, mito 5, plas 5, nucl 3, cyto 3, cyto_nucl 3
proteinId19845	1.79616	0.0307496	4.31042	7.14312e-09	2.51426	0.000500771	8.49475	1.22231	27.2605					plas 13, vacu 5, mito 4, E.R. 4
proteinId198463	0.0298676	0.972346	3.67266	3.78233e-11	3.64279	4.13368e-12	1.84141	0.922489	12.399					mito 18, cyto 5.5, cyto_nucl 5, nucl 3.5
proteinId198578	0.333209	0.41663	2.78866	5.35351e-17	2.45545	1.81602e-13	57.9278	23.3702	166.617					plas 25	MBOAT_2
proteinId198582	2.62431	5.63258e-05	4.71254	1.06638e-14	2.08823	8.22259e-05	5.53164	0.446358	12.7314					nucl 13, cyto 6.5, cyto_mito 6, mito 4.5
proteinId198650	2.2269	0.181427	4.95352	0.000533506	2.72662	0.0149406	0.645859	0.0483004	2.47309					mito 24, nucl 2
proteinId198836	0.112707	0.792692	-0.755158	0.0244412	-0.867865	0.0101287	62.6169	29.5028	17.7835					mito 10, cyto 10, cyto_mito 10	Methyltransf_23,Methyltransf_18,Methyltransf_31,Methyltransf_11,Methyltransf_12
proteinId199041	-0.384442	NA	-1.51605	0.529303	-1.13161	0.653149	0.237041	0.214031	0					nucl 13.5, cyto_nucl 11, cyto 5.5, mito 5
proteinId199094	0.454508	0.402184	-4.04447	6.47299e-15	-4.49898	4.27099e-18	26.635	9.85861	0.587809	KOG1318	Helix loop helix transcription factor EB	Transcription	INFORMATION STORAGE AND PROCESSING	nucl 22, cyto 5	HLH
proteinId199168	-1.7628	5.89198e-05	-1.52123	0.000357852	0.241577	0.621061	3.96747	6.95111	2.44236	KOG2590	RNA-binding protein LARP/SRO9 and related La domain proteins	Posttranslational modification, protein turnover, chaperones	CELLULAR PROCESSES AND SIGNALING	mito 11, nucl 10.5, cyto_nucl 8, cyto 4.5	La
proteinId199309	2.36141	1.69594e-05	6.43436	6.62597e-37	4.07295	5.67717e-23	10.2468	0.982186	92.8898					nucl 25, mito_nucl 13.833, cyto_nucl 13.333
proteinId199319	1.1122	0.044314	-1.68259	0.00218095	-2.79479	1.67962e-07	10.4604	2.44158	0.762035	KOG2510	SWI-SNF chromatin-remodeling complex protein	Chromatin structure and dynamics	INFORMATION STORAGE AND PROCESSING	nucl 20, mito 5	Zn_clus
proteinId199333	-0.479287	0.753641	3.40824	0.0019261	3.88752	0.000301667	0.976588	0.706413	8.94228					nucl 16.5, cyto_nucl 12.5, cyto 5.5, mito 5
proteinId199487	4.38192	2.46825e-10	2.45879	0.000512057	-1.92313	0.00039856	7.6199	0.174972	1.02978					nucl 8.5, cyto_nucl 8.5, cyto 7.5, plas 5, mito 2, golg 2	NACHT,AAA_16
proteinId199508	6.21591	0.00326847	-0.0150834	0.998233	-6.231	0.00199701	2.18157	0	0					nucl 11.5, cyto_nucl 11, cyto 7.5, mito 6
proteinId199684	7.82595	8.70105e-08	8.54176	1.34864e-09	0.715809	0.180248	7.73132	0	6.63267					plas 12, mito 8, nucl 2, cyto 2, cyto_nucl 2, E.R. 2
proteinId199710	-1.57084	0.0836919	-2.63562	0.00131452	-1.06478	0.226327	25.7241	41.9857	6.52578	KOG1198	Zinc-binding oxidoreductase	General function prediction only	POORLY CHARACTERIZED	mito 13, cyto 8, E.R. 3, pero 2	ADH_zinc_N,ADH_zinc_N_2
proteinId199739	0.0406589	0.92361	-1.53612	7.90529e-07	-1.57677	4.30284e-07	31.8325	15.93	5.58151	KOG0676	Actin and related proteins	Cytoskeleton	CELLULAR PROCESSES AND SIGNALING	cyto 17, nucl 8.5, mito_nucl 5	Actin
proteinId199792	4.67405	7.4565e-07	4.64781	3.61761e-07	-0.0262401	0.974954	7.16033	0.117343	3.6886	KOG0725	Reductases with broad range of substrate specificities	General function prediction only	POORLY CHARACTERIZED	mito 22, nucl 2, cyto 2, cyto_nucl 2	adh_short,adh_short_C2,KR
proteinId199799	2.53807	NA	-0.0063861	0.998233	-2.54446	0.29388	0.338652	0	0					nucl 18, cyto_nucl 12, cyto 4, mito 3
proteinId199827	0.199941	0.651926	-8.25194	6.04388e-21	-8.45188	1.08545e-21	40.2098	17.8321	0.041785	KOG0849	Transcription factor PRD and related proteins, contain PAX and HOX domains	Transcription	INFORMATION STORAGE AND PROCESSING	nucl 21.5, cyto_nucl 13, cyto 3.5	Homeobox
proteinId199877	0.200439	0.711173	-2.74366	1.64601e-10	-2.9441	7.87549e-12	22.7388	10.0129	1.50426	KOG1991	Nuclear transport receptor RANBP7/RANBP8 (importin beta superfamily)	Intracellular trafficking, secretion, and vesicular transport	CELLULAR PROCESSES AND SIGNALING	cyto 13, cyto_nucl 12, nucl 7, mito 2, E.R. 2	IBN_N,Cse1
proteinId200164	1.14855	0.107935	5.81762	5.12285e-23	4.66907	4.91997e-24	2.65242	0.584537	36.3872					cyto_mito 8.333, cyto 8, mito 7.5, extr 7, cyto_nucl 6.333, nucl 3.5
proteinId200281	4.42754	6.59488e-11	7.0764	1.77714e-27	2.64886	1.545e-07	12.4061	0.260363	40.9867					nucl 22, cyto 3
proteinId200348	-0.804207	0.143347	-5.40453	2.37684e-24	-4.60032	9.11633e-18	32.4252	29.1106	0.670358	KOG2133	Transcriptional corepressor Atrophin-1/DRPLA	General function prediction only	POORLY CHARACTERIZED	nucl 26.5, cyto_nucl 14
proteinId200417	-1.2963	0.0107305	-0.443663	0.378637	0.852639	0.0887104	4.63932	5.91474	4.43666					nucl 6, mito 6, mito_nucl 6, extr 5, cyto 3
proteinId200497	-0.493904	0.509543	3.50022	3.57824e-10	3.99412	1.67022e-13	1.59689	1.16554	13.9392					nucl 12.5, mito_nucl 11.666, mito 9.5, cyto_nucl 9.333, cyto 4
proteinId200578	-0.302493	0.835105	-1.87229	0.140134	-1.5698	0.226332	1.22763	0.784534	0.193916	KOG0014	MADS box transcription factor	Transcription	INFORMATION STORAGE AND PROCESSING	nucl 14.5, cyto_nucl 13, cyto 8.5, mito 2
proteinId200649	1.05894	NA	-0.718857	0.759154	-1.7778	0.423927	0.462726	0.0937472	0.043153					mito 12, nucl 3, cyto 3, plas 3, cyto_nucl 3, pero 3, cyto_pero 3
proteinId200656	4.31253	3.41198e-05	6.24233	2.01014e-10	1.9298	0.000272291	4.36801	0.0852043	8.8487					mito 14, nucl 7, cyto 5
proteinId200691	2.05182	NA	-0.00526869	0.998233	-2.05709	0.391777	0.223242	0	0					nucl 13.5, cyto_nucl 11.833, cyto 9, cyto_mito 7.333
proteinId200786	-0.941888	0.0229399	-1.42331	0.000214837	-0.481427	0.24645	70.839	69.2883	26.191	KOG0331	ATP-dependent RNA helicase	RNA processing and modification	INFORMATION STORAGE AND PROCESSING	nucl 12, cyto_nucl 11, cyto 8, mito 3, pero 3	Helicase_C
proteinId200907	-1.27557	0.014868	-6.63933	1.24545e-34	-5.36376	9.06543e-23	61.2352	75.3205	0.714551	KOG0331	ATP-dependent RNA helicase	RNA processing and modification	INFORMATION STORAGE AND PROCESSING	nucl 10, cyto 7, pero 7, cyto_pero 7	DEAD,Helicase_C
proteinId20095	0.564059	0.142763	1.77606	1.1353e-07	1.212	0.000315662	48.3148	16.7719	59.0846	KOG3772	M-phase inducer phosphatase	Cell cycle control, cell division, chromosome partitioning	METABOLISM	mito 20, nucl 3, cyto 3, cyto_nucl 3	Rhodanese
proteinId200989	0.304856	0.684458	-5.00663	8.85903e-07	-5.31149	1.90643e-07	13.4641	5.58332	0.128058					mito 15, cyto 7.5, cyto_nucl 5, nucl 1.5
proteinId200990	0.341364	0.375489	-0.565138	0.0927507	-0.906501	0.00628889	33.4199	13.5284	9.33121	KOG0789	Protein tyrosine phosphatase	Signal transduction mechanisms	CELLULAR PROCESSES AND SIGNALING	nucl 15, mito 6, cyto 4	Y_phosphatase,Rhodanese
proteinId200991	0.429345	0.465004	5.13151	1.89058e-30	4.70217	6.5352e-31	7.74846	2.94381	108.983					plas 18, mito 4, cyto 2, pero 2, mito_nucl 2, cyto_pero 2
proteinId201039	-0.855673	0.0376711	-6.48645	5.57308e-23	-5.63077	2.0505e-17	34.4926	32.1741	0.314849					extr 23, E.R. 2
proteinId201121	1.64617	0.00108733	0.613909	0.229638	-1.03226	0.033979	13.7671	2.24367	3.52415	KOG1649	SWI-SNF chromatin remodeling complex, Snf5 subunit	Chromatin structure and dynamics	INFORMATION STORAGE AND PROCESSING	nucl 21.5, cyto_nucl 14, cyto 3.5
proteinId201389	-0.917756	NA	-1.25631	0.531098	-0.338551	0.876971	0.203145	0.229798	0.0762898					nucl 13.5, cyto_nucl 12, cyto 7.5, mito 3
proteinId201646	5.58164	0.000350842	9.44206	9.1196e-11	3.86042	8.08525e-11	5.37561	0	41.9331					plas 10, golg 6, E.R. 5, mito 4
proteinId201651	5.79183	0.000381965	7.78005	3.79827e-07	1.98822	0.00724234	3.76566	0	8.18557	KOG2992	Nucleolar GTPase/ATPase p130	Nuclear structure	CELLULAR PROCESSES AND SIGNALING	extr 15, nucl 6.5, cyto_nucl 5, cyto 2.5
proteinId201767	NA	NA	NA	NA	NA	NA	0	0	0					plas 12, mito 9, E.R. 5
proteinId201993	-0.453845	0.227119	1.80114	1.34923e-08	2.25499	8.77463e-13	21.9059	15.4537	55.4314	KOG2628	Farnesyl cysteine-carboxyl methyltransferase	Posttranslational modification, protein turnover, chaperones	CELLULAR PROCESSES AND SIGNALING	plas 23, E.R. 2	ICMT,PEMT
proteinId202093	NA	NA	NA	NA	NA	NA	0	0	0					mito 19, cyto 5, cyto_nucl 5
proteinId202197	0.0863641	0.897025	-3.91113	1.68725e-13	-3.99749	6.23131e-14	27.3843	13.2965	0.873351	KOG0590	Checkpoint kinase and related serine/threonine protein kinases	Cell cycle control, cell division, chromosome partitioning	METABOLISM	nucl 18.5, cyto_nucl 13, cyto 6.5	Pkinase,Pkinase_Tyr
proteinId202288	1.15755	0.00413621	-2.24549	1.19732e-08	-3.40304	2.59306e-18	122.222	28.22	5.99768					mito 16, nucl 7.5, cyto_nucl 7, cyto 3.5
proteinId202336	-0.954846	0.369335	-4.78965	0.000342671	-3.8348	0.0051102	2.96307	2.99132	0.0692662					mito 14, nucl 7, cyto_mito 7
proteinId202339	-0.423425	0.431377	-0.901363	0.0502476	-0.477938	0.329652	14.5915	10.0163	5.4094	KOG1187	Serine/threonine protein kinase	Signal transduction mechanisms	CELLULAR PROCESSES AND SIGNALING	extr 15, mito 6, nucl 4
proteinId202347	8.75202	3.39647e-30	10.4222	1.65841e-43	1.67018	0.0119745	196.968	0.181336	326.015	KOG4733	FOG: RRM domain	General function prediction only	POORLY CHARACTERIZED	nucl 26, cyto_nucl 14.5	RRM_1,RRM_6
proteinId202447	1.13791	0.00969107	-1.1459	0.00868061	-2.28381	6.02817e-08	15.8	3.6465	1.67795	KOG1979	DNA mismatch repair protein - MLH1 family	Replication, recombination and repair	INFORMATION STORAGE AND PROCESSING	cyto 11.5, nucl 11, cyto_mito 8, mito 3.5	DNA_mis_repair,HATPase_c_3,HATPase_c
proteinId202623	0.61244	0.0337397	0.725398	0.00648951	0.112959	0.706404	78.7387	26.2847	44.4264	KOG0895	Ubiquitin-conjugating enzyme	Posttranslational modification, protein turnover, chaperones	CELLULAR PROCESSES AND SIGNALING	mito 11, nucl 7, cyto 7, cyto_nucl 7	UQ_con
proteinId202708	-0.309624	0.371755	-1.8272	8.90478e-10	-1.51758	4.50231e-07	14.5018	9.22788	2.63629	KOG1703	Adaptor protein Enigma and related PDZ-LIM proteins	Cytoskeleton	CELLULAR PROCESSES AND SIGNALING	nucl 17, cyto_nucl 12.5, cyto 6, mito 1, plas 1, cysk 1, vacu 1	RhoGAP,LIM
proteinId203003	0.0257377	0.950185	-3.79571	1.3679e-33	-3.82145	7.28247e-34	79.2663	39.8691	2.89334	KOG1146	Homeobox protein	General function prediction only	POORLY CHARACTERIZED	nucl 23, cyto 3	DUF1752
proteinId203066	-0.122702	0.930791	-1.29364	0.254428	-1.17094	0.312888	2.98944	1.65023	0.656778					mito 9, cyto 7.5, cyto_nucl 5.5, plas 5, extr 3
proteinId203075	-0.431387	0.755829	-0.841016	0.478755	-0.409629	0.743202	1.29675	0.930747	0.511387					mito 15, nucl 7, cyto 2, extr 2
proteinId203094	-0.479407	0.215524	2.01935	9.63559e-10	2.49876	4.24613e-14	132.742	95.5848	399.716	KOG3239	Density-regulated protein related to translation initiation factor 1 (eIF-1/SUI1)	General function prediction only	POORLY CHARACTERIZED	cyto 17, cyto_nucl 13.833, nucl 8.5, mito_nucl 5.666	SUI1
proteinId203809	-0.478185	0.295173	1.63724	2.26446e-05	2.11543	4.42556e-08	23.536	16.6399	53.3209	KOG1096	Adenosine monophosphate deaminase	Nucleotide transport and metabolism	METABOLISM	nucl 17.5, cyto_nucl 12.5, cyto 6.5	A_deaminase
proteinId203831	-2.42438	0.0399652	0.462599	0.692507	2.88697	0.00864309	0.902271	2.79	4.0067					extr 9, cyto 7.5, mito 6, cyto_nucl 6, nucl 3.5
proteinId203863	3.71885	0.0695453	5.31371	0.00404314	1.59486	0.262373	0.682052	0	1.16265					mito 11, nucl 9, cyto_nucl 8.5, cyto 6
proteinId203919	0.236068	0.880284	2.43133	0.0379853	2.19527	0.0580097	1.17554	0.496538	3.05203					mito 18, extr 4, nucl 2.5, cyto_nucl 2.5
proteinId203921	-0.143358	0.728215	-6.60851	1.62345e-56	-6.46516	8.50672e-54	73.7766	41.6569	0.418312	KOG1216	von Willebrand factor and related coagulation proteins	Extracellular structures	CELLULAR PROCESSES AND SIGNALING	mito 13, cyto 6.5, cyto_nucl 6.5, nucl 5.5
proteinId204993	-0.0902944	0.950266	3.76248	8.85207e-05	3.85277	1.23635e-05	0.437312	0.234972	3.67034					nucl 10, cyto 6, mito 5, extr 2, plas 1, pero 1, golg 1, cysk 1
proteinId205072	0.813574	0.179698	-1.75311	0.00128596	-2.56669	2.04178e-06	118.71	33.7295	9.99358					mito 17, nucl 7, extr 2
proteinId205103	0.313448	0.7853	0.786681	0.405627	0.473233	0.626211	3.01483	1.22173	2.1797					mito 12, nucl 9.5, cyto_nucl 7, cyto 3.5
proteinId205213	0.890923	0.389929	1.34196	0.137113	0.45104	0.633663	3.38577	0.891232	2.4026					nucl 12, cyto 6, mito 4, plas 2, extr 1, pero 1, golg 1
proteinId205379	2.79369	0.112602	10.6256	9.08377e-13	7.83187	3.24568e-37	0.787947	0	100.415					nucl 11, mito 8, cyto_nucl 8
proteinId205453	0.433066	0.159429	0.0193207	0.963522	-0.413745	0.149804	71.5665	27.0766	28.0624	KOG1164	Casein kinase (serine/threonine/tyrosine protein kinase)	Signal transduction mechanisms	CELLULAR PROCESSES AND SIGNALING	nucl 12, mito 6, cyto 4, pero 4, cyto_pero 4	Pkinase
proteinId205487	-1.48084	0.00232628	-7.16859	2.30054e-28	-5.68775	4.59046e-18	11.611	16.5965	0.105816	KOG4433	Tweety transmembrane/cell surface protein	General function prediction only	POORLY CHARACTERIZED	nucl 25	Fungal_trans,Zn_clus
proteinId205646	-0.198645	0.897505	1.88121	0.10074	2.07985	0.0626247	0.348646	0.205718	0.838731					mito 13, cyto 8, mito_nucl 8
proteinId205844	1.87618	0.254425	5.43713	6.81773e-05	3.56095	0.000345013	0.431964	0.0403247	2.9661					mito 16, nucl 7, cyto 2
proteinId206081	-1.20304	0.182088	-1.41011	0.0912	-0.207067	0.828834	2.29125	2.83436	1.04948	KOG0800	FOG: Predicted E3 ubiquitin ligase	Posttranslational modification, protein turnover, chaperones	CELLULAR PROCESSES AND SIGNALING	extr 20, cyto 4, mito 2, cyto_pero 2
proteinId206142	-0.675934	0.0672616	-3.02666	3.97647e-19	-2.35073	6.73893e-12	94.7939	78.0684	9.61958					mito 10, extr 9, cyto 6
proteinId206295	4.101	6.28543e-11	8.4856	5.49718e-45	4.3846	3.42632e-13	84.711	2.31853	952.134	KOG2254	Predicted endo-1,3-beta-glucanase	Carbohydrate transport and metabolism	METABOLISM	extr 18, cyto 6, mito 2	Glyco_hydro_81
proteinId206628	-0.0922307	0.874355	-0.880261	0.0500509	-0.78803	0.0861789	22.3315	12.1925	6.69117	KOG2684	Sirtuin 5 and related class III sirtuins (SIR2 family)	Chromatin structure and dynamics	INFORMATION STORAGE AND PROCESSING	cyto_nucl 12.666, nucl 11, cyto 11, cyto_mito 7.332, mito_nucl 7.332	SIR2
proteinId206779	4.74239	1.45543e-06	9.31883	1.01931e-23	4.57644	1.66218e-23	6.59923	0.0890056	84.4736	KOG0449	Succinate dehydrogenase, cytochrome b subunit	Carbohydrate transport and metabolism	METABOLISM	mito 23, cyto 2	Sdh_cyt
proteinId206821	0.951452	0.0177638	-4.56503	1.66646e-16	-5.51648	1.20016e-23	30.9494	8.18423	0.333214	KOG0082	G-protein alpha subunit (small G protein superfamily)	Signal transduction mechanisms	CELLULAR PROCESSES AND SIGNALING	nucl 9, cyto_nucl 8, mito 6, cyto 5, pero 3, plas 2	G-alpha,Arf
proteinId206850	1.88488	1.65022e-06	5.23441	1.33658e-45	3.34953	4.47663e-21	42.1155	5.79865	228.81					plas 19, E.R. 4, mito 3
proteinId207035	0.648309	0.41525	2.12403	0.00123683	1.47572	0.0221888	1.22518	0.391415	1.79028	KOG2208	Vigilin	Lipid transport and metabolism	METABOLISM	cyto 11, nucl 10, mito 3, pero 3	KH_1,KH_3
proteinId207038	0.925893	0.589035	0.6144	0.697597	-0.311493	0.842493	0.841356	0.210442	0.352997					nucl 16, cyto_nucl 13, cyto 8
proteinId207134	-0.0564902	0.943095	-3.3262	1.23663e-06	-3.26971	1.96798e-06	4.25185	2.24996	0.212029	KOG0391	SNF2 family DNA-dependent ATPase	General function prediction only	POORLY CHARACTERIZED	nucl 18.5, cyto_nucl 11.5, cyto 3.5, mito 3
proteinId207153	0.674573	NA	-1.51904	0.444577	-2.19361	0.259992	0.712748	0.217226	0.0549817					nucl 16, mito 6, cyto 4
proteinId207154	-0.314798	0.840114	2.31113	0.0446585	2.62593	0.0202962	0.737099	0.481912	2.73377					nucl 12, mito 10, cyto 5
proteinId207464	4.76218	0.00377862	8.48788	1.88087e-08	3.7257	8.40845e-12	2.4247	0	17.2982					nucl 16, mito_nucl 13.499, cyto_nucl 10.333, mito 9.5
proteinId207474	1.99799	NA	1.89251	0.433767	-0.105474	0.969571	0.459809	0	0.21731					plas 12, mito 8, E.R. 3, golg 2, cyto 1.5, cyto_nucl 1.5
proteinId207483	2.08865	0.102091	4.36709	9.51127e-05	2.27844	0.0147852	1.43102	0.145436	3.79197					cyto_mito 8.166, mito 8, cyto 8, cyto_pero 7.333, cyto_nucl 6.333	Ank_2,Ank
proteinId207492	0.6621	0.267448	0.423239	0.447233	-0.238861	0.680633	8.47228	2.70162	3.72754	KOG0283	WD40 repeat-containing protein	Function unknown	POORLY CHARACTERIZED	nucl 21.5, cyto_nucl 12.5, cyto 2.5	WD40
proteinId20754	0.855669	0.00900238	3.26389	1.64651e-28	2.40822	1.18257e-16	32.1951	9.05849	89.6445	KOG1764	5'-AMP-activated protein kinase, gamma subunit	Energy production and conversion	METABOLISM	nucl 14.5, cyto_nucl 11.5, mito 7, cyto 5.5	CBS
proteinId207554	0.0922844	0.943095	-5.79939	0.000468728	-5.89168	0.000425869	4.24165	2.08273	0					mito 16, cyto 4.5, cyto_nucl 4, nucl 2.5, extr 2, cysk 2
proteinId207899	1.27686	0.0798813	3.76002	2.87452e-09	2.48316	1.54835e-05	10.1667	2.08517	30.6863					plas 14, mito 6, extr 3, E.R. 3, cyto_mito 3, mito_nucl 3
proteinId207915	-0.634823	0.27783	-1.46999	0.00454313	-0.835168	0.124139	11.0767	8.72954	3.17079	KOG1162	Predicted small molecule transporter	Intracellular trafficking, secretion, and vesicular transport	CELLULAR PROCESSES AND SIGNALING	nucl 22.5, cyto_nucl 13.5, cyto 3.5	SPX
proteinId207979	1.80236	0.00269314	5.90929	3.16851e-28	4.10692	7.53119e-21	8.20718	1.17712	76.6458					nucl 13, mito 11, cyto 2
proteinId20810	2.5013	0.00150699	6.27511	1.16012e-18	3.77381	9.64358e-15	6.32331	0.52813	46.2878					nucl 18.5, cyto_nucl 12.833, cyto_mito 4.499, cyto 4, mito 3.5
proteinId208101	2.5489	1.25416e-07	3.76041	3.61091e-16	1.21151	0.00879114	10.7285	0.907419	12.9612	KOG0988	RNA-directed RNA polymerase QDE-1 required for posttranscriptional gene silencing and RNA interference	RNA processing and modification	INFORMATION STORAGE AND PROCESSING	nucl 18.5, cyto_nucl 13.5, cyto 7.5	RdRP
proteinId20813	1.47996	0.00481232	2.50155	2.46527e-07	1.02159	0.0349997	15.8129	2.89601	17.0597					nucl 11.5, cyto_nucl 9.833, cyto 7, cyto_pero 6.333, pero 4.5	Autophagy_act_C
proteinId208168	2.63411	NA	0.666187	0.763755	-1.96792	0.32018	0.494373	0.0240752	0.0487538	KOG1285	Beta, beta-carotene 15,15'-dioxygenase and related enzymes	Secondary metabolites biosynthesis, transport and catabolism	METABOLISM	mito 15, nucl 8, cyto 3
proteinId208227	0.83328	NA	0.370516	0.870711	-0.462763	0.829732	1.05756	0.266931	0.377802					mito 20, nucl 5
proteinId20851	-0.729291	0.0342633	-1.3499	1.73054e-05	-0.620611	0.0603689	110.309	93.3799	37.2175	KOG0063	RNAse L inhibitor, ABC superfamily	RNA processing and modification	INFORMATION STORAGE AND PROCESSING	mito 11, cyto_nucl 8.5, nucl 7, cyto 6	ABC_tran,SMC_N,AAA_21
proteinId208600	8.98099	2.25553e-08	4.29767	0.00711335	-4.68332	0.00122857	290.552	0.0763797	4.30486					mito 10.5, cyto_mito 9.833, cyto 8, cyto_nucl 7.833, nucl 6.5
proteinId208688	0.334869	0.837762	2.25239	0.0665932	1.91752	0.103966	0.789662	0.310212	1.69411					cysk 10, mito 9, cyto 5, cyto_nucl 4.333, cyto_pero 3.333
proteinId208706	-1.89707	0.00399593	-7.73079	3.37891e-07	-5.83372	0.0001653	3.91554	7.66688	0					mito 18, nucl 6, cyto 2
proteinId20880	-0.110756	0.930719	5.7992	1.69565e-13	5.90996	5.36475e-18	0.761987	0.404597	26.1725					mito 17, nucl 10
proteinId208842	-1.7745	0.0115198	-5.43823	1.34376e-11	-3.66373	8.58386e-06	17.0887	30.8693	0.64427					mito 17, nucl 8.5, cyto_nucl 5
proteinId208889	-1.49594	0.00991026	0.468817	0.414864	1.96476	0.000296653	35.8247	52.6759	75.3512	KOG4157	beta-1,6-N-acetylglucosaminyltransferase, contains WSC domain	Carbohydrate transport and metabolism	METABOLISM	mito 9, plas 4, nucl 3, extr 3, golg 3, cyto 2, pero 2, cyto_pero 2
proteinId208909	9.82141	3.26199e-34	13.3838	2.58324e-64	3.56238	5.1013e-11	604.85	0.224841	3792.2					plas 21, E.R. 2, golg 2
proteinId208921	1.51909	0.0203983	0.322987	0.639197	-1.19611	0.0542709	16.3223	2.89983	3.71773	KOG2992	Nucleolar GTPase/ATPase p130	Nuclear structure	CELLULAR PROCESSES AND SIGNALING	mito_nucl 11.332, nucl 11, mito 11
proteinId208959	1.94196	6.06624e-05	-5.67927	2.08965e-09	-7.62123	6.31773e-16	78.0911	10.2636	0.146391					extr 19, E.R. 4, vacu 2
proteinId209210	-0.820793	0.043605	1.34864	0.000238142	2.16943	2.83887e-09	25.4511	23.236	60.5626					plas 21, mito 3, E.R. 2
proteinId20952	0.31018	0.447892	3.37539	3.5119e-25	3.06521	1.39718e-21	23.9072	9.92862	106.587	KOG2133	Transcriptional corepressor Atrophin-1/DRPLA	General function prediction only	POORLY CHARACTERIZED	plas 9, nucl 6, cyto_nucl 5.5, extr 4, mito 3, cyto 3
proteinId209963	0.0992706	0.959671	0.777944	0.615999	0.678673	0.663898	0.630156	0.305006	0.576914					mito 19, cyto 5, nucl 3
proteinId210021	-0.519297	0.254566	-3.63108	7.49571e-19	-3.11178	4.92126e-14	43.9639	32.0206	2.57375	KOG1669	Predicted mRNA cap-binding protein related to eIF-4E	Translation, ribosomal structure and biogenesis	INFORMATION STORAGE AND PROCESSING	mito 15.5, cyto_mito 10, extr 6, cyto 3.5	IF4E
proteinId210022	0.662409	0.120177	5.87876	1.73593e-62	5.21635	2.11986e-59	8.56541	2.75466	169.587					nucl 7.5, cyto_nucl 6.5, cysk 6, mito 5, cyto 4.5, golg 3
proteinId210083	0.424418	0.30407	0.946648	0.00768238	0.522229	0.160361	32.6572	12.3449	24.4364	KOG0293	WD40 repeat-containing protein	Function unknown	POORLY CHARACTERIZED	mito 10.5, cyto_mito 8.666, nucl 7.5, cyto_nucl 7.166, cyto 5.5, cyto_pero 4.666	WD40,eIF2A,CLTH
proteinId210379	-0.8429	0.0796547	-8.90271	1.17702e-10	-8.05981	7.98417e-09	14.8864	13.8408	0	KOG4157	beta-1,6-N-acetylglucosaminyltransferase, contains WSC domain	Carbohydrate transport and metabolism	METABOLISM	nucl 16, cyto 9	LOH1CR12
proteinId210575	-0.195814	0.739522	-2.90703	8.70686e-10	-2.71122	1.3345e-08	9.52512	5.61196	0.751627	KOG0565	Inositol polyphosphate 5-phosphatase and related proteins	Intracellular trafficking, secretion, and vesicular transport	CELLULAR PROCESSES AND SIGNALING	nucl 8.5, cyto_nucl 8, cyto 6.5, mito 4, plas 4, golg 2	Exo_endo_phos
proteinId210836	2.36875	5.40697e-10	-1.27331	0.00195215	-3.64205	1.03211e-20	49.6418	4.87974	2.0547					nucl 9.5, cyto_nucl 9.5, mito 8, cyto 6.5
proteinId210876	-0.540717	0.658056	-5.76081	0.000642636	-5.22009	0.00234203	3.88503	2.91551	0					mito 15, extr 6, cyto 4
proteinId210881	0.0565595	0.933671	-5.53675	1.84723e-10	-5.59331	1.43781e-10	8.68915	4.25262	0.0760243					mito 7, plas 7, cyto 4, mito_nucl 4, extr 3, cyto_pero 3	Fungal_trans
proteinId210915	1.22925	0.374659	2.98379	0.00964897	1.75454	0.0939395	1.00742	0.201138	1.91597					nucl 11, mito 11, mito_nucl 11
proteinId210920	3.78717	0.032512	8.18283	2.15763e-07	4.39566	1.29651e-09	1.36185	0	16.1396					mito 14.5, cyto_mito 10.666, cyto_nucl 6.833, nucl 6, cyto 5.5
proteinId21103	-1.34159	0.000972957	-0.00695356	0.998233	1.33464	0.000622697	436.2	577.548	586.668	KOG3446	NADH:ubiquinone oxidoreductase NDUFA2/B8 subunit	Energy production and conversion	METABOLISM	mito 19.5, cyto_mito 11.5, nucl 4	L51_S25_CI-B8
proteinId211046	0.70557	0.809691	4.3383	0.0525346	3.63273	0.102489	0.109252	0	1.95297					plas 13, nucl 4, mito 4, E.R. 4, mito_nucl 4
proteinId211133	-0.00575451	NA	-2.40827	0.304099	-2.40252	0.31791	0.56645	0.294113	0					nucl 22.5, cyto_nucl 14, cyto 2.5
proteinId211277	3.77539	0.037628	7.42679	4.61705e-06	3.6514	3.13137e-06	0.884526	0	6.22903					nucl 21.5, cyto_nucl 12, mito 4
proteinId211335	NA	NA	NA	NA	NA	NA	0	0	0					extr 13, golg 8, E.R. 4
proteinId211383	4.21018	0.00139953	4.05332	0.00124208	-0.156866	0.894518	6.89742	0.138649	3.17021					nucl 8, mito 8, mito_nucl 8, extr 4
proteinId211491	2.57874	NA	-0.00489763	0.998233	-2.58363	0.284049	0.989483	0	0					mito 9, nucl 5, cyto 4, golg 3, cyto_pero 3, plas 2, pero 2
proteinId211571	-1.44808	0.26061	-3.43783	0.00734762	-1.98975	0.142424	1.31021	1.99153	0.151216					nucl 14.5, cyto_nucl 11.5, cyto 7.5, mito 4
proteinId211710	0.382772	0.704927	-1.87368	0.0370445	-2.25645	0.0109539	5.31149	2.07564	0.537338					nucl 12, mito 9, cyto_nucl 9
proteinId211848	-0.313921	0.631886	2.56041	2.94953e-07	2.87433	5.31376e-09	9.93907	6.38829	39.4849					plas 19, E.R. 4, mito 2, vacu 2
proteinId211871	-0.735855	0.494226	0.982462	0.282335	1.71832	0.0557819	2.67307	2.31629	4.76738					mito 18, cyto 5, nucl 3
proteinId212041	-2.32413	4.10588e-11	-4.33219	1.66635e-26	-2.00806	2.03387e-06	6.78292	17.5725	0.86902					plas 19, mito 3, E.R. 3
proteinId212044	0.471323	0.541597	4.1807	6.36914e-13	3.70938	8.55103e-13	2.8353	1.03444	20.0972					mito 7, plas 7, extr 6, E.R. 4, cyto_mito 4
proteinId212099	1.6878	0.0449586	-0.840167	0.322968	-2.52796	0.00147703	28.0328	4.41993	2.46296					mito 12.5, cyto_mito 10, cyto 6.5, nucl 6
proteinId212328	5.81872	7.60526e-19	12.6719	2.13977e-88	6.85313	6.22543e-80	24.6864	0.194444	1530.48					nucl 12, cyto 10, mito 2, pero 2
proteinId212423	2.47393	3.62649e-07	4.56682	2.33067e-23	2.09288	3.65629e-08	4.14657	0.371488	9.36787	KOG4210	Nuclear localization sequence binding protein	Transcription	INFORMATION STORAGE AND PROCESSING	cyto_nucl 10, nucl 9.5, cyto 9.5, pero 4, mito 2
proteinId212454	7.97259	1.68855e-13	12.1796	3.15097e-31	4.20702	1.00441e-14	15.6595	0.0147225	154.398	KOG0683	Glutamine synthetase	Amino acid transport and metabolism	METABOLISM	cyto 12, cyto_nucl 9, cysk 6, nucl 4, pero 4	Gln-synt_C,Amidohydro_2
proteinId212551	2.48784	0.00012035	5.6669	1.57464e-21	3.17905	1.02279e-12	3.37154	0.292194	16.3908	KOG2029	Uncharacterized conserved protein	Function unknown	POORLY CHARACTERIZED	plas 7, nucl 5, extr 5, mito 4, cyto_nucl 4
proteinId212581	0.752992	0.778272	6.27995	0.00102517	5.52695	0.000459457	0.101803	0	4.1702					mito 13, cyto 5.5, cyto_nucl 5.333, cyto_pero 3.666, nucl 3, plas 2
proteinId212682	3.57325	5.35443e-21	2.82721	9.93553e-14	-0.746039	0.0310125	17.4084	0.737506	5.43029	KOG1869	Splicing coactivator SRm160/300, subunit SRm300	RNA processing and modification	INFORMATION STORAGE AND PROCESSING	nucl 15.5, cyto_nucl 10, mito 7, cyto 3.5
proteinId212845	1.86955	0.00382833	1.41332	0.0221526	-0.456227	0.492945	78.1616	10.945	30.3922					mito 6, extr 6, cyto 5.5, cyto_nucl 5.5, nucl 4.5, plas 3
proteinId212868	0.504606	0.343319	-1.10684	0.0221357	-1.61145	0.000655686	26.0703	9.39641	4.43588					mito 14, nucl 11.5, cyto_nucl 7
proteinId212917	1.18271	0.327595	-4.51394	0.0101779	-5.69665	0.00108933	3.80534	0.828985	0					mito 8, nucl 4.5, cyto_nucl 4.5, extr 4, cyto 3.5, plas 3, pero 2
proteinId212933	1.18378	0.119333	-2.12512	0.00357897	-3.3089	3.91586e-06	17.4461	3.85124	0.875797					nucl 22.5, cyto_nucl 13, cyto 2.5
proteinId213264	-0.907756	0.00930145	-7.90884	1.11477e-46	-7.00108	1.67903e-36	132.687	127.737	0.494888	KOG1187	Serine/threonine protein kinase	Signal transduction mechanisms	CELLULAR PROCESSES AND SIGNALING	nucl 14, cyto_nucl 11, mito 7, cyto 6
proteinId213377	1.11408	0.0621621	-0.315594	0.615161	-1.42967	0.0108833	17.675	4.17233	3.41482					cyto_nucl 16, nucl 14, cyto 12
proteinId213443	0.812488	0.151588	-1.62856	0.00236768	-2.44105	3.38088e-06	13.3536	3.85299	1.24075					mito 21.5, mito_nucl 13.5, nucl 4.5
proteinId213473	3.86229	0.000252042	2.48408	0.0172881	-1.37821	0.131344	5.63093	0.16799	1.07258	KOG4742	Predicted chitinase	General function prediction only	POORLY CHARACTERIZED	cyto 13, extr 10, mito 4	Polysacc_deac_1
proteinId213573	-0.0476022	0.922121	-0.511008	0.172425	-0.463405	0.223559	6.07388	3.21672	2.29476	KOG2992	Nucleolar GTPase/ATPase p130	Nuclear structure	CELLULAR PROCESSES AND SIGNALING	mito 10, nucl 9.5, cyto_nucl 7, cyto 3.5, plas 1, extr 1, pero 1, golg 1
proteinId213593	-2.12216	2.94557e-09	-4.25903	1.22957e-33	-2.13687	3.03704e-09	51.945	116.727	6.13313	KOG1187	Serine/threonine protein kinase	Signal transduction mechanisms	CELLULAR PROCESSES AND SIGNALING	extr 20, mito 3, plas 2, mito_nucl 2
proteinId213661	5.81646	3.38408e-09	2.5787	0.00896075	-3.23776	0.000491718	72.2629	0.552883	3.73274					extr 21, mito 4	Lipase_GDSL_2,Lipase_GDSL
proteinId213768	-1.6937	1.32712e-06	-7.49324	2.74439e-58	-5.79954	5.58281e-35	49.1028	82.4895	0.440067					mito 13, nucl 11.5, cyto_nucl 7.5
proteinId213944	-0.619574	0.0803691	0.131883	0.713051	0.751457	0.02207	21.0986	16.6947	18.6801					mito 10, plas 6, nucl 3, pero 3, extr 2, E.R. 2	DUF1691
proteinId213991	1.46688	0.0123308	6.85352	3.27917e-41	5.38664	2.94018e-37	6.39109	1.15427	143.552					cysk 12, mito 6, cyto_nucl 4, nucl 3.5, cyto 3.5	SnoaL_2
proteinId214119	-0.328687	0.512792	0.839654	0.0445065	1.16834	0.00507399	15.7863	10.165	18.5747	KOG1902	Putative signal transduction protein involved in RNA splicing	Signal transduction mechanisms	CELLULAR PROCESSES AND SIGNALING	nucl 22.5, cyto_nucl 13.5, cyto 3.5	YTH
proteinId214145	0.304901	0.470144	-0.241602	0.526899	-0.546503	0.138352	10.1706	4.21102	3.62394	KOG2148	Exocyst protein Sec3	Intracellular trafficking, secretion, and vesicular transport	CELLULAR PROCESSES AND SIGNALING	nucl 20.5, cyto_nucl 14, cyto 6.5	Sec3_C,Sec3-PIP2_bind
proteinId214171	1.23566	0.0551915	4.45462	6.19747e-16	3.21896	2.1972e-12	3.04328	0.64404	15.1647					nucl 16, mito 7, cyto 2
proteinId2142	0.628293	0.247553	-0.389663	0.454278	-1.01796	0.0383478	8.03392	2.64834	2.04894	KOG4324	Guanine nucleotide exchange factor	Intracellular trafficking, secretion, and vesicular transport	CELLULAR PROCESSES AND SIGNALING	mito 13, nucl 10.5, cyto_nucl 7.5, cyto 3.5	Sec2p
proteinId21434	0.140309	0.768768	1.18783	0.00108802	1.04752	0.00420475	14.6035	6.7891	15.8254	KOG1929	Nucleotide excision repair factor NEF2, RAD4/CUT5 component	Replication, recombination and repair	INFORMATION STORAGE AND PROCESSING	cyto 19.5, cyto_nucl 13, nucl 5.5	PTCB-BRCT,BRCT
proteinId214403	1.18307	8.21503e-05	-3.09537	4.98283e-22	-4.27845	2.28533e-41	156.734	35.3478	4.168					mito 17, nucl 5.5, cyto_nucl 5, cyto 3.5
proteinId214608	0.825385	0.513148	2.40448	0.0202193	1.57909	0.11938	2.95155	0.837942	4.9396	KOG2748	Uncharacterized conserved protein, contains chromo domain	Chromatin structure and dynamics	INFORMATION STORAGE AND PROCESSING	cyto_nucl 10.333, cyto 9.5, nucl 9, cyto_pero 6.666, mito 4, pero 2.5
proteinId214809	3.40319	2.13912e-05	2.65364	0.000677314	-0.749548	0.330613	9.54197	0.433313	2.94775	KOG1187	Serine/threonine protein kinase	Signal transduction mechanisms	CELLULAR PROCESSES AND SIGNALING	nucl 17.5, cyto_nucl 11, mito 8
proteinId214810	4.07778	4.6238e-05	8.33133	3.73803e-19	4.25355	1.08318e-21	8.16189	0.192119	83.837					mito 18.5, cyto_mito 11.5, cyto 3.5, plas 2
proteinId215135	-0.255407	0.773338	-2.48215	0.000884374	-2.22674	0.00320287	7.37364	4.56013	0.80175					mito 12, extr 6, nucl 4, cyto 4, cyto_nucl 4
proteinId215158	0.961601	0.000910101	-1.0574	0.000188411	-2.019	3.04296e-13	109.825	28.8926	14.1375	KOG1216	von Willebrand factor and related coagulation proteins	Extracellular structures	CELLULAR PROCESSES AND SIGNALING	extr 18, mito 3, plas 3, E.R. 2
proteinId215454	0.989013	0.00430527	4.05319	2.34732e-38	3.06418	1.55919e-23	16.389	4.23564	72.8512	KOG1033	eIF-2alpha kinase PEK/EIF2AK3	Translation, ribosomal structure and biogenesis	INFORMATION STORAGE AND PROCESSING	cysk 12, cyto_nucl 7.5, cyto 7, nucl 6	Pkinase,Pkinase_Tyr
proteinId215463	-2.02913	1.32041e-07	-1.02637	0.00665309	1.00275	0.0102524	9.77257	20.8079	10.3688					mito 7, extr 7, plas 4, golg 4, E.R. 3	DUF3431
proteinId215517	2.54857	0.000241419	3.81449	4.63331e-09	1.26592	0.0288644	3.85482	0.321296	4.96338	KOG0255	Synaptic vesicle transporter SVOP and related transporters (major facilitator superfamily)	General function prediction only	POORLY CHARACTERIZED	plas 27	MFS_1,Sugar_tr,TRI12
proteinId215564	5.10299	2.10477e-12	7.76392	1.84396e-28	2.66094	1.20004e-05	50.7288	0.659463	169.14					E.R. 8, extr 7, golg 5, plas 4, mito 2
proteinId215629	0.833173	0.00785511	3.71803	6.67077e-40	2.88486	1.37568e-25	13.2742	3.80125	51.6077	KOG2063	Vacuolar assembly/sorting proteins VPS39/VAM6/VPS3	Intracellular trafficking, secretion, and vesicular transport	CELLULAR PROCESSES AND SIGNALING	cyto 10.5, cyto_nucl 9.5, nucl 5.5, mito 3, plas 3, pero 3	Vps39_2,Clathrin
proteinId215677	0.697257	0.0519305	3.12551	4.67608e-23	2.42825	1.49895e-14	34.1904	10.699	96.4374					cyto 6.5, cyto_nucl 6, E.R. 5, nucl 4.5, mito 3, extr 3, golg 2
proteinId215760	1.25886	0.00654551	3.72921	7.60537e-19	2.47035	3.90201e-09	17.2975	3.62994	50.1998	KOG1869	Splicing coactivator SRm160/300, subunit SRm300	RNA processing and modification	INFORMATION STORAGE AND PROCESSING	mito 19, cyto_mito 13, cyto 5
proteinId215847	8.47762	6.40586e-09	7.40832	1.90114e-07	-1.0693	0.019667	24.6276	0	6.12615					plas 18, E.R. 4, mito 2, golg 2
proteinId216020	3.10165	7.32659e-12	4.94388	1.11183e-29	1.84223	1.90518e-05	41.9942	2.42815	78.7042					nucl 21, cyto 5
proteinId216355	0.262182	0.550134	1.0203	0.00426857	0.758114	0.0365381	37.5854	15.9339	33.1075					cysk 19, cyto_nucl 4, nucl 3.5, cyto 3.5	DUF427
proteinId21640	-2.2488	NA	-0.660944	0.798547	1.58785	0.528031	0	0.161972	0.0781027					mito 16, nucl 6.5, cyto_nucl 5.5, cyto 3.5
proteinId216440	-1.16352	0.0132816	-1.98606	4.54118e-06	-0.822544	0.0724311	64.5287	74.4752	18.8325	KOG1459	Squalene synthetase	Lipid transport and metabolism	METABOLISM	plas 16, mito 3, cyto 3, cyto_mito 3	SQS_PSY
proteinId216913	1.16973	0.0284772	0.0790606	0.897686	-1.09067	0.0312788	22.688	5.1563	5.54384					plas 10, extr 6, mito 5, golg 3, cyto_mito 3	Glyco_transf_8
proteinId217132	-0.697148	0.22848	0.687855	0.188084	1.385	0.00686368	35.443	30.2247	49.9725	KOG3069	Peroxisomal NUDIX hydrolase	Replication, recombination and repair	INFORMATION STORAGE AND PROCESSING	mito 19, nucl 4, cyto 3	NUDIX
proteinId21722	0.993933	0.554652	1.30556	0.374161	0.311628	0.835956	1.91823	0.454995	1.29488					mito 20, nucl 5.5, cyto_nucl 4
proteinId2177	-2.75682	1.40693e-21	-0.884902	0.00240425	1.87191	8.62293e-11	158.93	552.265	304.622	KOG3147	6-phosphogluconolactonase - like protein	Carbohydrate transport and metabolism	METABOLISM	cyto 9, cyto_nucl 7.5, extr 5, nucl 4, E.R. 4, mito 1, pero 1, golg 1, cysk 1, vacu 1	Glucosamine_iso
proteinId21781	-0.249465	0.619497	-2.87341	3.35162e-12	-2.62394	2.79301e-10	33.0325	20.0744	2.7305	KOG2652	RNA polymerase II transcription initiation factor TFIIA, large chain	Transcription	INFORMATION STORAGE AND PROCESSING	nucl 18, cyto 6, mito 1, plas 1, pero 1	TFIIA
proteinId217847	0.0324655	0.946665	1.41038	5.04612e-05	1.37791	8.22259e-05	18.3918	9.2151	25.0639	KOG1878	Nuclear receptor coregulator SMRT/SMRTER, contains Myb-like domains	Transcription	INFORMATION STORAGE AND PROCESSING	nucl 14, cyto_nucl 13.5, cyto 9
proteinId217923	-2.59994	2.5581e-17	-4.41354	7.14506e-49	-1.8136	3.67691e-09	780.528	2460.46	116.43	KOG3352	Cytochrome c oxidase, subunit Vb/COX4	Energy production and conversion	METABOLISM	cysk 10, cyto 7, cyto_nucl 5, mito 3, E.R. 3	COX5B
proteinId217939	1.10786	0.0294715	-1.64529	0.00117631	-2.75314	2.38545e-08	21.8574	5.18807	1.67422					cyto_mito 10.833, mito 10.5, cyto 10, cyto_nucl 7.833, nucl 4.5	Aminotran_4
proteinId218025	2.34952	0.000439967	-0.60979	0.402744	-2.95931	5.97347e-06	23.8702	2.30897	1.53946					plas 18, mito 4, E.R. 2, vacu 2, cyto_mito 2, mito_nucl 2
proteinId21810	0.749256	0.17386	-0.205227	0.71582	-0.954482	0.0602499	18.5785	5.63771	4.98295					extr 13, plas 8, mito 2, E.R. 2
proteinId218179	2.35073	0.000141545	4.51664	3.60771e-15	2.16591	1.3154e-05	7.35403	0.702737	17.3634					cyto 10.5, cyto_mito 9.166, cyto_nucl 7.666, cyto_pero 7.666, mito 6.5, nucl 3.5, pero 3.5
proteinId218606	-1.25731	0.0034695	-2.20127	5.44256e-08	-0.943957	0.0264515	19.7334	24.1544	5.2714	KOG0335	ATP-dependent RNA helicase	RNA processing and modification	INFORMATION STORAGE AND PROCESSING	nucl 20.5, cyto_nucl 13, cyto 4.5	DEAD,Helicase_C
proteinId218661	0.832117	0.0195913	1.77841	3.97654e-08	0.946292	0.0041035	28.6156	8.22468	29.0381	KOG2326	DNA-binding subunit of a DNA-dependent protein kinase (Ku80 autoantigen)	Replication, recombination and repair	INFORMATION STORAGE AND PROCESSING	cyto 18.5, cyto_nucl 13.5, nucl 5.5	Ku,Ku_N
proteinId218708	0.591198	0.416078	-3.43276	1.24454e-05	-4.02396	2.35935e-07	14.0012	4.68725	0.398292					mito_nucl 14.333, nucl 13.5, mito 13, cyto_nucl 7.666
proteinId218752	1.70942	0.00612309	1.35921	0.0242456	-0.35021	0.568466	19.7228	3.03808	8.07596					plas 17, E.R. 5, mito 2, extr 1, golg 1, vacu 1, cyto_mito 1, mito_nucl 1
proteinId218778	-0.380845	0.298786	0.320613	0.334131	0.701457	0.0301609	70.7413	46.9015	59.8505	KOG0278	Serine/threonine kinase receptor-associated protein	Lipid transport and metabolism	METABOLISM	nucl 11.5, cyto_nucl 11.333, cyto 8, cyto_pero 5.499, extr 4	WD40
proteinId21906	1.20851	0.103884	-2.38834	0.00256037	-3.59685	3.03887e-06	15.8155	3.44711	0.636598					nucl 13, cyto_nucl 10.5, cyto 6, cysk 5
proteinId219092	-0.965351	0.0249739	-3.26869	2.15023e-16	-2.30334	1.21122e-08	31.3203	31.3414	3.27854	KOG1156	N-terminal acetyltransferase	Chromatin structure and dynamics	INFORMATION STORAGE AND PROCESSING	nucl 17.5, cyto_nucl 12.5, cyto 6.5	NARP1,TPR_11,TPR_19,TPR_14,TPR_9,TPR_2,TPR_16,TPR_1,TPR_17,TPR_12,TPR_8,Apc3
proteinId219432	-0.479412	0.171059	-0.944619	0.00258902	-0.465207	0.159745	18.3303	13.1269	6.94208	KOG1187	Serine/threonine protein kinase	Signal transduction mechanisms	CELLULAR PROCESSES AND SIGNALING	mito 16.5, cyto_mito 10.333, nucl 7.5, cyto_nucl 5.833
proteinId219702	0.637377	NA	1.92683	0.417268	1.28946	0.611669	0.126773	0	0.372093					extr 15, mito 4, plas 4, cyto 2, pero 2, mito_nucl 2, cyto_pero 2
proteinId219704	1.79714	0.0510474	3.20869	0.000103714	1.41156	0.0664959	3.60393	0.507678	5.23333					mito 21, nucl 4
proteinId219736	2.96013	2.46812e-07	0.2708	0.664876	-2.68933	1.48323e-06	162.896	10.6441	13.1288					nucl 10, cyto 8, pero 5, cyto_mito 5
proteinId219825	4.547	3.66948e-06	6.78401	3.37849e-13	2.23701	0.00208542	9.52834	0.162476	24.5658					mito 12.5, cyto_mito 8.833, nucl 8.5, cyto_nucl 6.833, cyto 4	GFA
proteinId219939	-3.36092	1.348e-21	-12.95	7.4833e-197	-9.58913	9.22377e-108	1477.12	7814.61	0.908233	KOG4297	C-type lectin	Signal transduction mechanisms	CELLULAR PROCESSES AND SIGNALING	nucl 24.5, cyto_nucl 13.5
proteinId220233	-3.15364	1.90733e-11	-5.51869	2.74716e-24	-2.36505	2.96162e-05	10.4184	48.1538	1.0212					nucl 13, mito 8, cyto 4
proteinId220264	0.780629	0.494653	-2.36961	0.0287618	-3.15024	0.00317907	3.6471	1.05808	0.18981					nucl 14, mito 9, cyto_nucl 9
proteinId220372	0.870179	NA	2.57062	0.209143	1.70044	0.407993	0.281522	0.0544045	0.614188					nucl 10, cyto_nucl 9, cyto 6, mito 4, cysk 4
proteinId220441	-0.143424	0.800288	-0.381573	0.4162	-0.238149	0.627361	17.9752	10.1703	7.98656					plas 14, mito 8, E.R. 2, pero 1, golg 1, vacu 1
proteinId220476	1.48571	0.00611561	3.01548	1.05916e-09	1.52977	0.000974702	21.6912	3.92266	33.398					plas 17, mito 7, golg 2
proteinId220681	1.16661	0.00179163	2.78694	5.76517e-16	1.62033	2.50308e-06	23.9005	5.40458	38.446	KOG1187	Serine/threonine protein kinase	Signal transduction mechanisms	CELLULAR PROCESSES AND SIGNALING	nucl 15.5, cyto_nucl 11.833, cyto 7, cyto_mito 4.833, plas 2
proteinId220779	1.15171	0.00625331	5.13385	7.47764e-44	3.98214	6.45971e-35	15.0554	3.44751	126.419	KOG1216	von Willebrand factor and related coagulation proteins	Extracellular structures	CELLULAR PROCESSES AND SIGNALING	nucl 17, mito 5, cyto 3
proteinId220854	1.78788	0.00100726	-0.322513	0.569465	-2.11039	4.70162e-05	34.5914	5.12351	4.18224	KOG3694	Protein required for meiosis	Cell cycle control, cell division, chromosome partitioning	METABOLISM	mito 8, cyto 6, plas 6, mito_nucl 6	RICTOR_N,RICTOR_M,RasGEF_N_2,RICTOR_V,HR1
proteinId221064	0.983533	0.0853719	-0.403962	0.467787	-1.38749	0.00841601	108.709	27.3855	21.0687	KOG2992	Nucleolar GTPase/ATPase p130	Nuclear structure	CELLULAR PROCESSES AND SIGNALING	nucl 19, cyto_nucl 13.5, cyto 6
proteinId221087	1.24755	0.429346	2.77101	0.0365262	1.52345	0.234938	0.895172	0.172483	1.46915					nucl 15, mito_nucl 12.333, cyto_nucl 8.833, mito 8.5
proteinId221093	-0.463231	NA	2.45554	0.274093	2.91877	0.196688	0.0815529	0.0736364	0.881474					nucl 10.5, cyto_nucl 8.5, mito 8, cyto 5.5
proteinId221114	0.174147	0.911971	-1.58382	0.240422	-1.75796	0.190758	1.23231	0.562835	0.168289					mito 14, nucl 10, cyto_nucl 7
proteinId221148	0.512903	0.355004	2.77269	9.13853e-10	2.25979	2.31745e-07	4.01604	1.4281	10.139	KOG2051	Nonsense-mediated mRNA decay 2 protein	RNA processing and modification	INFORMATION STORAGE AND PROCESSING	mito 13.5, cyto_mito 7.5, nucl 6, golg 3, plas 2
proteinId221267	4.29193	6.12977e-06	2.97242	0.00147869	-1.31951	0.115051	12.9147	0.300553	2.71408					plas 10, mito 5, extr 5, E.R. 2, nucl 1, cyto 1, cyto_nucl 1, pero 1, golg 1, vacu 1, cyto_pero 1
proteinId221516	-1.28698	0.000428886	-5.48078	3.51109e-31	-4.1938	1.70663e-18	34.6332	43.7124	0.948959					mito 16, nucl 6, cyto 5
proteinId221527	-2.30043	NA	-1.00636	0.654109	1.29407	0.57886	0.0747939	0.375781	0.157295					mito 10, plas 7, E.R. 3, nucl 2, golg 2, cyto 1, extr 1, pero 1, cyto_pero 1
proteinId221563	5.06944	6.15795e-19	-0.21417	0.753464	-5.28361	1.04863e-20	32.0981	0.45904	0.400524	KOG4157	beta-1,6-N-acetylglucosaminyltransferase, contains WSC domain	Carbohydrate transport and metabolism	METABOLISM	extr 25	WSC
proteinId221573	3.33244	6.56741e-05	5.45177	3.33835e-12	2.11934	0.000786088	7.30696	0.329407	16.7453					mito 12, extr 7, nucl 5, cyto_nucl 5
proteinId221659	3.95053	0.0134288	4.0441	0.00692319	0.0935651	0.948581	3.02714	0.0579736	1.64904					extr 11, mito 8, cyto 4.5, cyto_nucl 4.5, nucl 3.5
proteinId221670	0.90795	0.0358432	3.68258	1.10373e-21	2.77463	7.91634e-13	59.7116	16.1915	217.297	KOG4157	beta-1,6-N-acetylglucosaminyltransferase, contains WSC domain	Carbohydrate transport and metabolism	METABOLISM	extr 20, plas 3, mito 2
proteinId221883	0.472321	0.740317	-1.20467	0.34911	-1.67699	0.180248	1.0895	0.395678	0.161196					nucl 12.5, cyto_nucl 10.5, mito 6, cyto 5.5
proteinId221988	0.276793	0.87562	3.90598	0.00172495	3.62919	0.00151187	0.427612	0.16863	3.2851					plas 18, mito 7
proteinId221992	-1.65013	0.0399319	-2.73829	0.000178819	-1.08816	0.162752	201.036	344.48	50.2773	KOG2748	Uncharacterized conserved protein, contains chromo domain	Chromatin structure and dynamics	INFORMATION STORAGE AND PROCESSING	extr 19, golg 3, mito 2, cyto 1, pero 1, E.R. 1, mito_nucl 1, cyto_pero 1
proteinId2221	NA	NA	NA	NA	NA	NA	0	0	0					plas 19, mito 5, vacu 2
proteinId222223	0.764667	0.377246	4.07303	2.64778e-09	3.30837	3.97612e-08	1.55903	0.459124	8.47326					extr 15, mito 6, nucl 2, cyto 2, cyto_nucl 2
proteinId222243	4.12648	0.000178895	6.03003	5.26641e-09	1.90356	0.00304033	6.13732	0.128772	12.1655	KOG2294	Transcription factor of the Forkhead/HNF3 family	Transcription	INFORMATION STORAGE AND PROCESSING	nucl 23.5, cyto_nucl 14
proteinId222277	1.05908	0.0109459	0.259439	0.545802	-0.799641	0.0452051	31.3665	7.63088	9.32157	KOG4157	beta-1,6-N-acetylglucosaminyltransferase, contains WSC domain	Carbohydrate transport and metabolism	METABOLISM	mito 14.5, cyto_mito 10.833, cyto 6, cyto_nucl 4.333, plas 2, pero 2
proteinId222554	0.840661	0.113914	4.59759	4.32349e-25	3.75693	2.41723e-21	6.10991	1.73442	44.3484					mito 10.5, cyto_mito 7.333, extr 7, plas 4, cyto 3, cyto_nucl 2.333
proteinId22258	-0.684849	0.198767	-2.31241	2.37899e-06	-1.62756	0.00115497	20.7636	17.2409	3.49724	KOG3192	Mitochondrial J-type chaperone	Posttranslational modification, protein turnover, chaperones	CELLULAR PROCESSES AND SIGNALING	mito 24, nucl 2	HSCB_C
proteinId22259	2.35274	3.9904e-10	4.33528	3.12591e-33	1.98254	3.53062e-08	101.806	10.1801	213.736					nucl 19, cyto_nucl 12, cyto 3, mito 2, pero 2
proteinId222758	0.740012	0.1347	-2.92174	8.52006e-10	-3.66175	1.00143e-14	6.55117	1.9922	0.260477	KOG1878	Nuclear receptor coregulator SMRT/SMRTER, contains Myb-like domains	Transcription	INFORMATION STORAGE AND PROCESSING	nucl 16, cyto_nucl 11, mito 7, cyto 4	Myb_DNA-binding,Myb_DNA-bind_6
proteinId222919	0.302306	0.474721	3.38503	7.9586e-24	3.08273	2.95536e-20	11.7328	4.87151	52.7871	KOG2427	Uncharacterized conserved protein	Function unknown	POORLY CHARACTERIZED	mito 21, nucl 4	DUF544
proteinId223041	1.53016	NA	-0.0590555	0.995893	-1.58921	0.517367	0.452217	0.0449082	0.0413436	KOG1973	Chromatin remodeling protein, contains PHD Zn-finger	Chromatin structure and dynamics	INFORMATION STORAGE AND PROCESSING	nucl 21.5, cyto_nucl 14.5, cyto 4.5
proteinId223059	6.29662	0.00322148	-0.0148794	0.998233	-6.3115	0.00196897	4.27188	0	0					nucl 11.5, cyto_nucl 9.5, mito 8, cyto 6.5
proteinId223074	3.50504	NA	-0.00945569	0.998233	-3.5145	0.138597	0.892861	0	0					mito 17.5, cyto_mito 11.666, cyto_nucl 5.333, cyto 4.5, nucl 4
proteinId223209	0.471432	0.188812	2.46217	5.1427e-16	1.99074	1.853e-11	25.1382	9.25868	52.4753					mito 21, nucl 3, plas 2, cyto_nucl 2
proteinId22345	2.3877	0.0616998	0.234215	0.876567	-2.15348	0.0688478	2.91808	0.252744	0.312339	KOG1878	Nuclear receptor coregulator SMRT/SMRTER, contains Myb-like domains	Transcription	INFORMATION STORAGE AND PROCESSING	nucl 25, cyto_nucl 14.5
proteinId22360	0.887331	0.285536	-5.41433	1.13475e-14	-6.30166	3.49539e-19	1141	307.396	6.68495	KOG1642	Ribonuclease, T2 family	RNA processing and modification	INFORMATION STORAGE AND PROCESSING	extr 26	Ribonuclease_T2
proteinId223688	0.755615	0.618824	-1.0104	0.449735	-1.76602	0.177281	4.58464	1.35516	0.631406					nucl 13, cyto_nucl 11, cyto 7, mito 5
proteinId224065	1.56459	0.111889	1.43892	0.117944	-0.125666	0.898268	5.30257	0.876588	2.53915	KOG1187	Serine/threonine protein kinase	Signal transduction mechanisms	CELLULAR PROCESSES AND SIGNALING	nucl 11.5, cyto_nucl 9.5, cyto 6.5, mito 6
proteinId224084	1.19374	0.424337	0.525333	0.713532	-0.668411	0.627791	1.89025	0.391978	0.588067	KOG2589	Histone tail methylase	Chromatin structure and dynamics	INFORMATION STORAGE AND PROCESSING	nucl 14, cyto 7, mito 4, cyto_pero 4
proteinId224118	0.0696831	0.863083	0.104332	0.760754	0.0346491	0.923256	182.209	89.104	97.8489					extr 26	Glyco_hydro_16
proteinId224173	2.31479	0.253774	7.93395	1.9387e-06	5.61916	4.07937e-09	0.396424	0	11.8163					mito 12, plas 5, cyto_nucl 5, nucl 4, cyto 4
proteinId2244	0.19497	0.765786	1.77774	0.000342484	1.58277	0.00153766	6.73789	2.96115	10.5381					mito 20, nucl 5	UvrD-helicase,AAA_22,UvrD_C,UvrD_C_2
proteinId224547	-0.521716	0.273763	-1.3657	0.00103114	-0.843982	0.051039	30.7394	22.6451	8.9301	KOG0017	FOG: Transposon-encoded proteins with TYA, reverse transcriptase, integrase domains in various combinations	General function prediction only	POORLY CHARACTERIZED	mito 18, cyto 5, nucl 2, extr 2
proteinId224818	1.26128	0.255979	3.10133	0.00102729	1.84005	0.0361892	1.603	0.32784	3.20268					cyto_nucl 8, nucl 7.5, cyto 7.5, mito 7, cysk 4
proteinId224887	2.31257	2.31756e-05	1.19627	0.0269812	-1.1163	0.0383956	17.2264	1.70594	4.03308	KOG0118	FOG: RRM domain	General function prediction only	POORLY CHARACTERIZED	nucl 21.5, cyto_nucl 13, cyto 3.5	RRM_1,RRM_6,RRM_5
proteinId224944	-0.17556	0.634378	-1.2547	2.17711e-05	-1.07914	0.000307835	20.3644	11.7593	5.01666	KOG4305	RhoGEF GTPase	Signal transduction mechanisms	CELLULAR PROCESSES AND SIGNALING	nucl 15.5, cyto_nucl 12, cyto 7.5, pero 3	CNH,PH_5,RhoGEF,DEP
proteinId225134	NA	NA	NA	NA	NA	NA	0	0	0					nucl 18, cyto_nucl 12.5, cyto 5, mito 4
proteinId225301	-2.26645	4.51038e-05	-5.36068	3.24575e-23	-3.09423	1.98378e-08	37.0711	95.344	2.2436					cysk 21, cyto 3, mito 2, cyto_nucl 2	GST_N_3,GST_C_2,GST_C
proteinId225354	2.19302	0.000220533	4.46828	4.01093e-16	2.27526	1.72851e-06	5.23682	0.563353	13.3778					extr 22, golg 2, mito 1, E.R. 1, vacu 1	Glyco_hydro_16
proteinId225470	2.59882	0.00386846	6.2991	5.91593e-15	3.70028	6.58179e-13	2.4243	0.180366	17.0128					mito 19, nucl 5, plas 2
proteinId225520	2.35098	NA	0.0194386	0.998233	-2.33155	0.260621	0.653468	0.0405767	0.0441572					extr 9, cyto 6.5, cyto_mito 5.5, mito 3.5, nucl 3, plas 3
proteinId225577	2.33781	1.17891e-11	3.644	6.59297e-28	1.3062	8.07091e-05	84.6712	8.51639	110.081	KOG2075	Topoisomerase TOP1-interacting protein BTBD1	Function unknown	POORLY CHARACTERIZED	cyto 15, nucl 5, mito 4, pero 3	PIN_4
proteinId225618	2.4389	0.170501	3.47885	0.0282427	1.03994	0.456706	0.602268	0.0370634	0.69795					mito 20, cyto 3, nucl 2
proteinId225672	-1.48358	0.024788	-4.31512	1.9972e-07	-2.83153	0.000951056	4.82789	7.05252	0.322467					nucl 18.5, cyto_nucl 10.5, mito 6
proteinId225886	1.07484	0.0126785	0.98691	0.0150043	-0.0879308	0.850774	49.7459	11.8997	24.2888					nucl 16.5, cyto_nucl 10, mito 8
proteinId225933	2.39687	0.0253966	3.80579	9.18896e-05	1.40892	0.0761841	2.68042	0.234567	3.81677					nucl 20, cyto_nucl 13.5, cyto 5
proteinId225939	-1.02729	0.276171	2.86422	0.000104798	3.89151	1.68326e-07	1.36041	1.46557	11.5057					mito 8, plas 7, nucl 4, cyto 3, E.R. 3
proteinId225985	1.18233	0.272524	2.44833	0.00822814	1.26599	0.149742	2.10536	0.447055	2.69058					nucl 17.5, cyto_nucl 12.5, cyto 6.5
proteinId226163	1.79026	0.113898	3.14206	0.0017265	1.35181	0.129179	2.61708	0.353484	3.60095					mito 7, plas 5, extr 5, E.R. 3, golg 3, nucl 2
proteinId226190	0.725698	0.0410242	0.616902	0.064591	-0.108796	0.770883	18.275	5.65176	8.86881	KOG0204	Calcium transporting ATPase	Inorganic ion transport and metabolism	METABOLISM	plas 24, E.R. 1, golg 1, vacu 1	E1-E2_ATPase,Cation_ATPase_C,Hydrolase,Hydrolase_like2,HAD,Cation_ATPase_N,Hydrolase_3
proteinId226201	1.07806	0.403145	4.60879	7.15352e-06	3.53073	5.619e-05	1.2867	0.285695	8.65621					mito 10, cyto 8, extr 3, nucl 2, pero 2, cysk 2
proteinId226809	-0.00279157	0.994951	-0.458092	0.103776	-0.455301	0.113733	354.338	180.912	134.452	KOG0401	Translation initiation factor 4F, ribosome/mRNA-bridging subunit (eIF-4G)	Translation, ribosomal structure and biogenesis	INFORMATION STORAGE AND PROCESSING	nucl 20.5, cyto_nucl 14, cyto 4.5
proteinId227054	6.13385	3.46963e-09	13.3942	1.1536e-41	7.26035	5.12165e-132	10.8575	0.0407248	890.801	KOG1029	Endocytic adaptor protein intersectin	Intracellular trafficking, secretion, and vesicular transport	CELLULAR PROCESSES AND SIGNALING	mito 17, nucl 6.5, cyto_nucl 5, cyto 2.5
proteinId227091	8.00435	1.62438e-13	11.567	4.03178e-28	3.5626	3.61539e-11	30.2727	0.0283162	189.731					nucl 22.5, cyto_nucl 14.5, cyto 3.5
proteinId227095	7.19435	1.09969e-05	5.83465	0.000236668	-1.35971	0.116335	13.0618	0	2.53703					mito 18.5, cyto_mito 11, nucl 3, cyto 2.5
proteinId227275	-0.161945	0.723734	-2.08717	3.70357e-09	-1.92523	6.90252e-08	35.9115	20.6544	4.90556	KOG4297	C-type lectin	Signal transduction mechanisms	CELLULAR PROCESSES AND SIGNALING	nucl 23.5, cyto_nucl 14
proteinId227428	6.75017	2.63828e-06	10.3507	3.46955e-14	3.60053	1.56994e-23	9.55351	0	61.4127					mito 17.5, cyto_mito 12.833, cyto 7, cyto_nucl 4.833	PvlArgDC
proteinId227431	3.5425	0.0844132	5.29578	0.00402019	1.75328	0.193628	0.573883	0	1.09433	KOG0504	FOG: Ankyrin repeat	General function prediction only	POORLY CHARACTERIZED	mito 20, pero 3, nucl 2, cyto_pero 2	Ank_2,Ank
proteinId227509	5.23867	0.0065001	4.32366	0.0186122	-0.915009	0.507691	3.24889	0	0.856009					nucl 14.5, cyto_nucl 12, cyto 6.5, mito 3
proteinId227530	-0.610188	0.463636	6.26213	1.15229e-28	6.87232	1.12407e-37	1.25273	0.977731	81.8573					nucl 22, cyto_nucl 14, cyto 4
proteinId227536	-1.79799	4.79053e-05	-2.49351	3.66571e-09	-0.695515	0.126071	16.4069	29.3056	5.25251	KOG1152	Signal transduction serine/threonine kinase with PAS/PAC sensor domain	Signal transduction mechanisms	CELLULAR PROCESSES AND SIGNALING	nucl 13, cyto_nucl 12.5, cyto 10, cysk 3	Pkinase,Pkinase_Tyr,Kinase-like
proteinId227635	2.03125	0.0192917	-1.94405	0.0475211	-3.97529	1.81055e-05	10.6187	1.30004	0.318931					mito 9, cyto 6.5, cyto_nucl 6.5, nucl 5.5, pero 2, cysk 2	Methyltransf_2
proteinId227825	3.51204	0.088878	6.10497	0.00089735	2.59293	0.0784497	0.817384	0	3.14532					mito 22.5, cyto_mito 13, cyto 2.5
proteinId227863	5.44144	0.00163421	7.35476	5.23161e-06	1.91332	0.0646431	1.96743	0	4.16973					cyto 7.5, cyto_pero 7.5, pero 6.5, nucl 5, cysk 5	Methyltransf_23,Methyltransf_11
proteinId228006	0.225889	0.751342	-7.15593	1.29805e-06	-7.38182	7.08265e-07	12.5023	5.45212	0					mito 9, cyto 6, extr 6, plas 4
proteinId228085	-0.0453698	0.925343	1.54331	7.23568e-06	1.58868	2.78966e-06	9.79236	5.18225	15.5463					plas 23, E.R. 2, vacu 2
proteinId228093	0.0850767	0.899608	-0.860705	0.112596	-0.945782	0.0807009	12.4091	6.00014	3.32748					nucl 11, mito 11, mito_nucl 11
proteinId228103	-2.77596	1.32259e-11	-3.92744	1.28333e-21	-1.15148	0.00811393	25.311	90.3959	5.89137					extr 20, mito 4, pero 1, E.R. 1, vacu 1	DUF1264
proteinId228160	-2.89004	5.67813e-07	-5.06275	1.07347e-19	-2.17271	0.000160393	20.2486	80.632	2.34063					nucl 12, cyto_nucl 11, cyto 8, mito 5	MMR_HSR1
proteinId228236	-2.53859	0.0015263	-6.04367	2.19311e-09	-3.50507	0.000817039	4.20373	13.3016	0.162417					nucl 11.5, cyto_nucl 10, cyto 7.5, mito 4, golg 2
proteinId228247	-2.52669	0.00130622	-4.78628	5.18602e-10	-2.25959	0.00489958	10.4831	33.2828	1.11407					cyto 7.5, extr 7, cyto_nucl 5.5, E.R. 5, nucl 2.5, pero 2, golg 2
proteinId228301	2.10199	0.00467632	6.90016	6.53673e-26	4.79817	8.26078e-27	3.62504	0.401995	54.1315					mito 18, cyto 6, nucl 2
proteinId228338	-1.86836	0.171005	2.32957	0.0472022	4.19793	0.000408038	0.968995	2.01653	11.7195	KOG0504	FOG: Ankyrin repeat	General function prediction only	POORLY CHARACTERIZED	mito 12, nucl 9.5, cyto_nucl 7, cyto 3.5
proteinId228382	0.730266	0.651725	1.63022	0.22128	0.899953	0.504054	2.37418	0.710008	2.52339					mito 11, plas 6, mito_nucl 6, cyto 4
proteinId228575	-0.235576	0.715421	-2.30063	3.37344e-06	-2.06505	3.87563e-05	93.0114	56.1295	11.4856	KOG1616	Protein involved in Snf1 protein kinase complex assembly	Carbohydrate transport and metabolism	METABOLISM	cyto 15.5, cyto_nucl 12.333, nucl 6, mito_nucl 5.999, mito 4.5	CBM_48
proteinId228610	2.60718	0.217639	6.55866	0.000251545	3.95148	0.00155761	0.377612	0	3.73454					extr 23, nucl 1, mito 1, cyto 1, cyto_nucl 1, pero 1, cyto_mito 1, mito_nucl 1, cyto_pero 1
proteinId228650	-0.292398	0.638702	-3.38596	1.33026e-11	-3.09356	9.20238e-10	24.2121	15.2941	1.44324	KOG1187	Serine/threonine protein kinase	Signal transduction mechanisms	CELLULAR PROCESSES AND SIGNALING	nucl 16, mito 7, cyto 3	Fungal_trans_2
proteinId228658	1.99663	0.00950844	5.72549	5.9319e-17	3.72885	2.19073e-11	1.78969	0.216402	13.0658					plas 19, E.R. 3, cyto 2, nucl 1, pero 1, vacu 1, cyto_mito 1
proteinId22872	-0.80755	0.0972373	-1.84846	2.66205e-05	-1.04092	0.0229144	26.671	24.166	6.80749	KOG3351	Predicted nucleotidyltransferase	General function prediction only	POORLY CHARACTERIZED	mito 19, cyto 8
proteinId228927	4.01977	0.0222089	8.80383	2.34423e-08	4.78406	5.9176e-08	0.900267	0	14.2267					nucl 16, cyto_nucl 14, cyto 10
proteinId229038	-0.649956	0.434928	-6.85159	1.01298e-05	-6.20163	8.05783e-05	6.23313	5.11512	0	KOG1162	Predicted small molecule transporter	Intracellular trafficking, secretion, and vesicular transport	CELLULAR PROCESSES AND SIGNALING	nucl 10, cyto 10, cyto_nucl 10	SPX
proteinId229538	-1.36791	0.00161186	-2.76819	1.52197e-10	-1.40028	0.00181434	10.5483	14.0975	2.08618	KOG4415	Uncharacterized conserved protein	Function unknown	POORLY CHARACTERIZED	mito 19.5, cyto_mito 11.5, nucl 3, cyto 2.5	Cauli_VI
proteinId229557	NA	NA	NA	NA	NA	NA	0	0	0					nucl 8, cyto 7, mito 5, plas 4, pero 2
proteinId229562	2.75516	0.0677588	1.63549	0.265983	-1.11967	0.413442	2.39392	0.141228	0.538482					mito 21, nucl 2, plas 1, E.R. 1, vacu 1, cyto_pero 1
proteinId229610	-2.02942	9.83852e-12	-1.76521	1.98612e-09	0.264208	0.42721	5.89788	12.419	3.71832	KOG0065	Pleiotropic drug resistance proteins (PDR1-15), ABC superfamily	Secondary metabolites biosynthesis, transport and catabolism	METABOLISM	plas 24, E.R. 2	ABC2_membrane,ABC_tran,PDR_CDR,ABC2_membrane_3,ABC_trans_N,AAA_21
proteinId229704	-0.13528	0.860009	-2.12892	0.000232623	-1.99364	0.000673512	66.7637	37.6607	8.65099					extr 23, golg 3	ATP-synt_S1
proteinId229765	-2.16513	0.0431931	0.519103	0.611273	2.68423	0.00665971	0.92656	2.30573	3.41434					extr 10, mito 7, plas 3, nucl 2, E.R. 2, cyto 1, pero 1, golg 1, cyto_pero 1
proteinId229874	-0.290227	0.558565	1.42275	0.000320404	1.71298	1.22878e-05	6.51551	4.10459	11.3537	KOG4389	Acetylcholinesterase/Butyrylcholinesterase	Signal transduction mechanisms	CELLULAR PROCESSES AND SIGNALING	extr 24, mito 2	COesterase,Abhydrolase_3
proteinId229940	-2.35923	0.0184372	-1.79593	0.0571909	0.563299	0.587861	123.588	366.013	101.403					cyto 18, cyto_nucl 12.166, cyto_mito 11.499, cyto_pero 10.499, nucl 4
proteinId230017	0.338782	0.373324	4.02168	5.89208e-40	3.6829	1.12843e-35	20.7802	8.43997	141.691	KOG0418	Ubiquitin-protein ligase	Posttranslational modification, protein turnover, chaperones	CELLULAR PROCESSES AND SIGNALING	mito 14, cyto 7, nucl 4	UQ_con,UBA_3
proteinId230166	0.988015	0.00605832	6.90219	6.58228e-104	5.91417	1.62371e-85	42.6093	11.0014	1375.56					extr 15, mito 4, nucl 3.5, cyto_nucl 2.5, E.R. 2	DUF1510
proteinId230239	2.28536	0.304154	2.20628	0.272327	-0.0790798	0.971541	1.57387	0.0914405	0.796073					cyto 11.5, mito 10, cyto_nucl 7.5, extr 3
proteinId230240	3.45185	0.032931	3.86618	0.00994302	0.414333	0.756662	2.52214	0.0755599	1.83788					plas 11, extr 8, mito 4, E.R. 4
proteinId230355	0.758781	0.240823	-2.05018	0.000481333	-2.80896	1.38293e-06	20.2014	6.05074	1.46695	KOG3246	Sentrin-specific cysteine protease (Ulp1 family)	General function prediction only	POORLY CHARACTERIZED	nucl 16, cyto_nucl 11.5, cyto 5, mito 4	Peptidase_C48
proteinId230433	1.64807	0.0557079	4.21019	4.11719e-08	2.56213	0.000974305	24.2934	3.84676	80.6013					cyto_nucl 8.833, nucl 8, cyto 7.5, cyto_pero 6.666, mito 6, pero 4.5
proteinId230439	-0.424816	0.412222	-0.628758	0.169949	-0.203943	0.681891	6.53045	4.48438	2.96148	KOG1414	Transcriptional activator FOSB/c-Fos and related bZIP transcription factors	Transcription	INFORMATION STORAGE AND PROCESSING	nucl 19.5, cyto_nucl 11.333, mito 3.5, cyto_mito 3.333	Aft1_HRA,bZIP_1,bZIP_2,Aft1_OSA
proteinId230820	1.89813	0.00103923	-1.59055	0.00779437	-3.48868	1.33086e-09	25.0239	3.32333	1.10483	KOG4797	Transcriptional regulator	Transcription	INFORMATION STORAGE AND PROCESSING	nucl 16, cyto_nucl 11, mito 7, cyto 4	Ecl1
proteinId230858	-1.16045	0.0425851	-4.70264	1.40105e-11	-3.54219	5.69799e-07	9.80407	11.4	0.413436					cyto 22.5, cyto_nucl 12.5, pero 2	GAF_2
proteinId230902	-0.358182	0.813071	-2.06971	0.0866015	-1.71153	0.170147	6.93344	4.57279	1.01051					cyto 8, nucl 7, extr 6, mito 3, plas 2
proteinId230952	-1.18352	0.000663042	-2.35625	4.63495e-12	-1.17273	0.000880294	16.5974	19.3227	3.81423	KOG0380	Sterol O-acyltransferase/Diacylglycerol O-acyltransferase	Lipid transport and metabolism	METABOLISM	plas 24, E.R. 2	MBOAT
proteinId230968	-1.33403	0.0189619	-3.93193	1.7844e-09	-2.5979	0.000108504	5.42085	7.08711	0.448228					nucl 8, mito 8, mito_nucl 8, cyto 6
proteinId231036	3.02888	0.124234	7.01471	3.82196e-05	3.98583	6.70865e-05	0.591461	0	5.49137					mito 13, nucl 7, cyto 5.5, cyto_pero 3.5
proteinId231243	0.953152	0.0504735	1.86769	2.08115e-05	0.914541	0.0464148	177.523	47.0379	176.753					cyto 16.5, cyto_nucl 11, nucl 4.5, cysk 4	Methyltransf_23,Methyltransf_11,Methyltransf_31,Methyltransf_18,Methyltransf_12
proteinId231476	-0.515163	0.198851	-3.0577	1.17882e-16	-2.54254	8.43882e-12	29.0707	21.2267	2.57363	KOG0295	WD40 repeat-containing protein	Function unknown	POORLY CHARACTERIZED	cyto 20, cyto_nucl 11.833, cyto_mito 11.333, nucl 2.5	WD40,Nup160
proteinId231501	-0.0464011	0.949775	-1.3681	0.0142076	-1.3217	0.0191698	9.92387	5.2417	2.02751	KOG0260	RNA polymerase II, large subunit	Transcription	INFORMATION STORAGE AND PROCESSING	mito 10, nucl 6.5, cyto_nucl 6.5, cyto 5.5, extr 5
proteinId231508	2.56071	0.0256194	6.52893	8.92153e-11	3.96822	5.48738e-11	1.55871	0.111279	13.2783					mito 22, nucl 3.5, cyto_nucl 3
proteinId231554	-1.90441	5.48209e-10	-3.07777	1.50818e-24	-1.17337	0.000168156	45.1105	86.5657	10.3584	KOG4350	Uncharacterized conserved protein, contains BTB/POZ domain	General function prediction only	POORLY CHARACTERIZED	nucl 10, cyto_nucl 8.5, extr 6, cyto 5, pero 4	BTB
proteinId231580	-0.990079	0.0317141	-4.47344	4.08146e-21	-3.48336	3.97835e-13	8.40986	8.6356	0.377801	KOG4308	LRR-containing protein	Function unknown	POORLY CHARACTERIZED	nucl 13, cyto 13, cyto_nucl 13	LRR_1,LRR_6
proteinId231697	0.437962	0.43003	5.3069	2.29494e-34	4.86894	2.52272e-32	11.6786	4.40492	183.449					plas 10, mito 6, E.R. 5, extr 2, pero 2
proteinId231710	-0.328145	0.500394	-3.1716	5.43223e-14	-2.84346	2.15485e-11	28.8941	18.4744	2.06076	KOG1869	Splicing coactivator SRm160/300, subunit SRm300	RNA processing and modification	INFORMATION STORAGE AND PROCESSING	nucl 19.5, cyto_nucl 11, mito 6
proteinId231786	0.94714	NA	-0.861512	0.637759	-1.80865	0.29452	0.873279	0.217226	0.106138					extr 9, mito 8, nucl 5.5, cyto_nucl 4, cyto 1.5
proteinId231810	2.55622	0.202524	7.54772	7.13197e-06	4.99151	1.94215e-07	0.256789	0	4.89856					cysk 17, nucl 5, cyto 4
proteinId231842	3.41042	0.0186895	5.14806	9.83947e-05	1.73765	0.0573167	1.76217	0.0555674	3.1765					nucl 11, mito 11, mito_nucl 11
proteinId231846	2.43733	0.000273927	8.03869	5.84216e-40	5.60135	3.17826e-35	9.25199	0.837942	246.26					plas 10, mito 7, extr 5, E.R. 3
proteinId231877	0.420195	0.814926	2.94011	0.0274173	2.51992	0.0436125	0.373462	0.137116	1.29401					cyto 10, cysk 7, mito 5, cyto_pero 5
proteinId232278	0.580739	0.0818044	1.52071	2.80221e-07	0.939974	0.00195519	293.567	100.775	295.91	KOG3386	Copper transporter	Inorganic ion transport and metabolism	METABOLISM	plas 25	Ctr
proteinId232451	0.234722	0.853247	0.00753096	0.998233	-0.227191	0.838681	2.77535	1.22093	1.265					nucl 20.5, cyto_nucl 13, cyto 4.5
proteinId232786	-2.00835	0.430444	3.2807	0.0912432	5.28905	0.0106091	0	0.137757	2.15243					nucl 9, mito 9, mito_nucl 9
proteinId232806	1.07311	0.159782	4.77528	4.68671e-14	3.70217	8.3206e-12	5.06028	1.19782	36.0522					nucl 23, mito_nucl 13.333, cyto_nucl 12.833
proteinId232827	-0.19395	0.803056	-0.398732	0.535067	-0.204782	0.764278	20.1709	11.7082	9.0789	KOG0374	Serine/threonine specific protein phosphatase PP1, catalytic subunit	General function prediction only	POORLY CHARACTERIZED	cyto 15, cyto_nucl 12.5, nucl 8, pero 3	Metallophos
proteinId232864	-0.38942	0.801684	2.47512	0.0303118	2.86454	0.0103829	0.528398	0.355025	2.27558					mito 9, cyto 8, cyto_nucl 8, nucl 6, pero 4
proteinId232915	-1.4508	1.02755e-07	-3.6726	6.68103e-42	-2.2218	6.7058e-16	69.0389	97.3023	7.7068	KOG0653	Cyclin B and related kinase-activating proteins	Cell cycle control, cell division, chromosome partitioning	METABOLISM	cysk 10, cyto_nucl 8, nucl 7.5, cyto 7.5	Cyclin_N,Cyclin_C
proteinId232955	-0.91075	0.0896264	-5.1357	9.71882e-12	-4.22495	3.21713e-08	14.3497	13.9265	0.357117					extr 19, cyto 5, mito 2
proteinId233030	1.88853	0.369044	-2.55964	0.236294	-4.44817	0.0336459	2.02088	0.229104	0					plas 10, extr 8, mito 4, E.R. 4
proteinId233180	0.914181	0.0196513	5.51911	1.95507e-56	4.60493	4.60991e-40	32.1097	8.72343	416.858	KOG0236	Sulfate/bicarbonate/oxalate exchanger SAT-1 and related transporters (SLC26 family)	Inorganic ion transport and metabolism	METABOLISM	plas 25	Sulfate_transp,Sulfate_tra_GLY,STAS
proteinId233341	0.563217	0.583179	3.04606	0.000141562	2.48285	0.000968228	1.75523	0.602525	5.38627					nucl 19.5, cyto_nucl 12.5, cyto 4.5
proteinId233395	-1.64457	0.000404611	-8.56356	1.98781e-09	-6.91899	1.81563e-06	11.4202	18.4735	0					mito 18, cyto_mito 12.5, cyto 5, nucl 2
proteinId233396	-1.28525	0.000952984	-2.54443	2.73841e-11	-1.25918	0.00148725	19.3424	24.1373	4.16058					nucl 23, cyto 2
proteinId233523	0.536101	0.170466	2.9419	1.14731e-18	2.4058	3.95934e-13	23.1273	8.22153	65.2159					mito 11, nucl 6, cyto 5, plas 3	dsrm
proteinId233545	1.30889	0.000653624	1.05495	0.00408718	-0.253945	0.530396	57.5268	11.6952	24.9082	KOG2146	Splicing coactivator SRm160/300, subunit SRm160 (contains PWI domain)	General function prediction only	POORLY CHARACTERIZED	nucl 19, cyto_nucl 12, mito 4, cyto 3
proteinId233557	-0.227279	0.666505	0.154964	0.739416	0.382244	0.39882	83.4145	50.8636	57.8487	KOG3627	Trypsin	Amino acid transport and metabolism	METABOLISM	nucl 17.5, cyto_nucl 12, cyto 5.5, mito 2
proteinId233723	-1.56885	0.00648149	-1.6741	0.00189997	-0.105248	0.868172	239.259	378.438	119.064					cyto 15.5, cyto_nucl 11.5, pero 6, nucl 4.5	APH,EcKinase
proteinId233953	-0.992098	0.00108833	0.495393	0.0939138	1.48749	2.05595e-07	116.71	119.893	173.044	KOG0137	Very-long-chain acyl-CoA dehydrogenase	Lipid transport and metabolism	METABOLISM	mito 14, extr 4, nucl 3, cyto 3, cyto_nucl 3	Acyl-CoA_dh_1
proteinId234050	3.14123	NA	3.63202	0.0809896	0.490793	0.802012	0.600822	0	0.470612					mito 12, plas 10, cyto 3
proteinId234361	5.81942	3.72524e-09	6.08718	2.06473e-10	0.267757	0.618951	5.52151	0.0367954	3.47855	KOG1216	von Willebrand factor and related coagulation proteins	Extracellular structures	CELLULAR PROCESSES AND SIGNALING	plas 15, nucl 4, mito 4, mito_nucl 4
proteinId23440	0.51664	0.516968	3.63843	4.33623e-09	3.12179	6.69462e-08	2.59181	0.927368	12.2879	KOG3276	Uncharacterized conserved protein, contains YggU domain	Function unknown	POORLY CHARACTERIZED	extr 21, mito 2, golg 2	Stanniocalcin
proteinId234577	-2.27966	4.87239e-10	-1.42956	7.18969e-05	0.850102	0.0241692	12.2492	30.4899	11.4928	KOG0465	Mitochondrial elongation factor	Translation, ribosomal structure and biogenesis	INFORMATION STORAGE AND PROCESSING	cysk 12, cyto 7.5, cyto_nucl 7.5, nucl 6.5	GTP_EFTU,EFG_II,EFG_IV,EFG_C,GTP_EFTU_D2
proteinId234588	2.51144	3.87961e-05	-2.16913	0.00109666	-4.68057	2.77362e-13	33.1021	2.90035	0.621474	KOG3599	Ca2+-modulated nonselective cation channel polycystin	Inorganic ion transport and metabolism	METABOLISM	mito 17, nucl 6, cyto_nucl 6, cyto 4
proteinId23459	-0.550966	0.232165	2.54962	4.33978e-11	3.10059	9.61076e-16	20.9629	15.9342	96.6292					mito 18, nucl 6.5, cyto_nucl 5
proteinId234603	1.32808	0.431377	3.57959	0.00977712	2.25151	0.066946	0.647896	0.108961	1.81472					cyto 7, plas 7, cyto_nucl 5.5, mito 4, pero 3, nucl 2, E.R. 2
proteinId2347	-0.281305	0.448463	1.24277	4.38896e-05	1.52407	5.22773e-07	10.0721	6.2447	15.1401	KOG0392	SNF2 family DNA-dependent ATPase domain-containing protein	Transcription	INFORMATION STORAGE AND PROCESSING	cyto 14, cyto_nucl 10, mito 6, nucl 4	DUF3535,SNF2_N,HEAT,Helicase_C,HEAT_2,Vac14_Fab1_bd
proteinId234852	2.25403	1.93292e-05	4.97417	1.06187e-23	2.72014	2.73211e-08	31.3596	3.30751	111.663					plas 20, E.R. 3, vacu 2	SUR7
proteinId234934	-1.27333	0.00155558	-2.61127	3.31072e-12	-1.33794	0.000538791	349.267	430.752	70.906	KOG2729	ER vesicle integral membrane protein involved in establishing cell polarity, signaling and protein degradation	Posttranslational modification, protein turnover, chaperones	CELLULAR PROCESSES AND SIGNALING	plas 11, E.R. 8, mito 6	Cornichon
proteinId234982	-0.922786	0.000493142	-0.815514	0.00129537	0.107272	0.710954	49.658	48.3222	28.015	KOG2454	Betaine aldehyde dehydrogenase	Energy production and conversion	METABOLISM	mito 13, cyto 10.5, cyto_nucl 6	Aldedh
proteinId235070	0.806736	0.163735	2.56077	3.14973e-07	1.75404	0.000438744	9.66926	2.83689	17.5279	KOG1474	Transcription initiation factor TFIID, subunit BDF1 and related bromodomain proteins	Transcription	INFORMATION STORAGE AND PROCESSING	extr 27	Cutinase
proteinId235221	3.1773	0.13992	5.00167	0.00866473	1.82437	0.223092	0.679606	0	1.45875					mito 14, extr 7, mito_nucl 7
proteinId235386	-0.141264	0.851313	-1.13589	0.0508715	-0.994629	0.0959127	31.5139	17.4377	8.00406					plas 21, E.R. 3, mito 1, pero 1, vacu 1	PAP2_3
proteinId235595	0.600778	0.10922	1.53425	3.48663e-06	0.933467	0.00458831	13.1486	4.41657	13.1436	KOG1079	Transcriptional repressor EZH1	Transcription	INFORMATION STORAGE AND PROCESSING	nucl 15, cyto_nucl 11.5, cyto 6, pero 3	SET
proteinId235601	0.100158	0.903426	-1.06834	0.0983207	-1.1685	0.0729252	11.9859	5.73344	2.77585					nucl 20, cyto 5
proteinId235687	1.26263	NA	-2.62637	0.225923	-3.889	0.0668996	0.941941	0.179687	0					mito 16, plas 4, E.R. 2, cyto 1, extr 1, pero 1, golg 1, vacu 1, cyto_pero 1
proteinId235879	-1.8753	4.60645e-07	-5.61851	7.71569e-57	-3.74321	1.26669e-25	890.993	1694.73	34.403	KOG2195	Transferrin receptor and related proteins containing the protease-associated (PA) domain	General function prediction only	POORLY CHARACTERIZED	extr 25	Peptidase_M28,PA
proteinId236018	0.3238	0.647466	-4.30438	9.16123e-08	-4.62818	8.74147e-09	10.4547	4.31175	0.19399	KOG3993	Transcription factor (contains Zn finger)	Transcription	INFORMATION STORAGE AND PROCESSING	plas 24, mito 2
proteinId236025	1.39933	1.77374e-05	6.39259	1.1397e-100	4.99326	1.05221e-70	24.2788	4.67219	409.774	KOG4715	SWI/SNF-related matrix-associated actin-dependent regulator of chromatin	Chromatin structure and dynamics	INFORMATION STORAGE AND PROCESSING	mito 15, plas 3, cyto 2, extr 2, pero 2, E.R. 2, cyto_pero 2	RCR
proteinId236064	2.51275	0.000903214	6.48314	3.03466e-21	3.97039	2.3301e-16	3.5226	0.285303	29.4911					mito 15, cyto 5.5, cyto_nucl 5, nucl 3.5
proteinId236129	2.76346	8.50339e-07	0.152384	0.826617	-2.61108	1.23307e-06	8.93141	0.651959	0.74078					nucl 12, cyto 7, mito_nucl 7
proteinId236653	0.322341	0.504472	-1.26767	0.00138714	-1.59001	6.43364e-05	852.21	344.089	145.008					mito 14, cyto 7.5, cyto_nucl 7.5, nucl 4.5	DUF3602
proteinId23681	2.41282	1.11055e-12	3.99726	2.42024e-34	1.58444	4.50025e-07	33.4159	3.16921	52.4012	KOG1399	Flavin-containing monooxygenase	Secondary metabolites biosynthesis, transport and catabolism	METABOLISM	nucl 6.5, cyto_nucl 6.5, mito 6, cyto 5.5, extr 4, E.R. 2	Pyr_redox_3,FMO-like,K_oxygenase,NAD_binding_8,NAD_binding_9,Pyr_redox_2
proteinId239090	1.99454	0.009882	-2.53956	0.000512043	-4.53409	3.69055e-10	134.968	17.2947	2.88736					extr 23, E.R. 2	DUF2401,DUF2403
proteinId239271	1.77985	0.0242374	4.7771	8.00789e-12	2.99725	7.08628e-07	2.5152	0.35129	10.747					cyto_mito 9.999, mito 9.5, cyto_nucl 9.333, cyto 9, nucl 6.5	TauD
proteinId239280	-1.28237	0.00781892	-0.119993	0.817453	1.16238	0.0117305	19.8232	25.1994	23.7161	KOG4178	Soluble epoxide hydrolase	Lipid transport and metabolism	METABOLISM	cyto 19, mito 5, cysk 2	Abhydrolase_6,Abhydrolase_5,Abhydrolase_1
proteinId239333	-0.00931817	0.990414	1.12753	0.0282911	1.13685	0.0277761	2.43541	1.27467	2.8741	KOG2806	Chitinase	Carbohydrate transport and metabolism	METABOLISM	nucl 15.5, cyto_nucl 11, mito 6, cyto 5.5
proteinId239758	-1.03426	NA	-3.28046	0.137207	-2.2462	0.334566	0.223441	0.281558	0					nucl 10, cyto_nucl 8, cysk 5, mito 4, cyto 4, pero 3
proteinId239815	-4.10617	1.36977e-17	-3.06515	9.53486e-11	1.04102	0.0394005	4.78968	43.7276	5.20778	KOG0161	Myosin class II heavy chain	Cytoskeleton	CELLULAR PROCESSES AND SIGNALING	mito 10, cyto 9.5, cyto_nucl 9, nucl 7.5	MMR_HSR1
proteinId239843	4.49807	0.0005067	6.19885	3.12686e-07	1.70078	0.0150879	0.816501	0.0117344	1.44175					mito 12, nucl 10, cyto 3
proteinId239862	1.57419	NA	3.01969	0.185426	1.4455	0.523843	0.211816	0	0.415395					cyto_nucl 10.5, nucl 10, cyto 9, mito 3, pero 3
proteinId239918	1.09106	0.0100181	0.965315	0.0162237	-0.125742	0.779925	12.054	2.86733	5.76592					cyto 11.5, cyto_nucl 11, nucl 9.5, mito 4
proteinId240006	1.73804	0.0839912	1.08301	0.254383	-0.655032	0.513008	36.8528	5.18905	11.6895					mito 13, nucl 8, cyto 4
proteinId240009	0.211097	0.548173	0.232019	0.451559	0.0209224	0.95194	21.297	9.41381	11.2828					nucl 19, cyto 5, cysk 3
proteinId240181	-0.19149	0.665613	-1.05628	0.0028767	-0.864787	0.0169246	31.6807	18.5326	9.09091	KOG1869	Splicing coactivator SRm160/300, subunit SRm300	RNA processing and modification	INFORMATION STORAGE AND PROCESSING	nucl 18.5, cyto_nucl 10.5, mito 7
proteinId240281	1.54617	0.0383797	-2.73895	5.37979e-05	-4.28511	2.29764e-10	4458.25	751.391	110.613	KOG3135	1,4-benzoquinone reductase-like; Trp repressor binding protein-like/protoplast-secreted protein	General function prediction only	POORLY CHARACTERIZED	cyto 14, cysk 4, mito 3, extr 3, nucl 1, pero 1, E.R. 1	Flavodoxin_1,FMN_red,Flavodoxin_2
proteinId240424	-0.738569	0.241405	-3.63665	2.11195e-10	-2.89808	5.95663e-07	17.1486	14.772	1.17381	KOG3140	Predicted membrane protein	Function unknown	POORLY CHARACTERIZED	plas 21, mito 2, E.R. 2	SNARE_assoc
proteinId240437	-0.133391	0.88469	-1.56037	0.0264922	-1.42698	0.0471698	8.8646	4.97822	1.65853	KOG2146	Splicing coactivator SRm160/300, subunit SRm160 (contains PWI domain)	General function prediction only	POORLY CHARACTERIZED	nucl 20, cyto_nucl 12.5, mito 4	Sel1
proteinId240548	-0.585269	0.181345	-2.22089	1.59454e-08	-1.63562	4.26596e-05	12.1356	9.41877	2.03866	KOG0613	Projectin/twitchin and related proteins	Cytoskeleton	CELLULAR PROCESSES AND SIGNALING	nucl 15.5, cyto_nucl 11, mito 6, cyto 5.5	DUF1708
proteinId240624	2.69547	0.00241159	-4.36946	0.00914324	-7.06493	1.59424e-05	8.16885	0.619963	0					mito 12.5, mito_nucl 10.166, cyto_nucl 7.833, cyto 7, nucl 6.5
proteinId240685	0.877967	0.0187521	1.15596	0.000822765	0.277991	0.458641	15.9244	4.42529	10.0955					nucl 23, mito 3	Fungal_trans,Zn_clus
proteinId240803	-0.26877	0.771913	1.88002	0.00775534	2.14879	0.00230545	4.9028	3.01985	11.8256					nucl 19.5, cyto_nucl 13.5, cyto 6.5
proteinId241302	-1.2016	NA	0.566643	0.827782	1.76824	0.475087	0	0.0522167	0.113649					nucl 20, cyto_nucl 14.5, cyto 5
proteinId241348	0.463957	0.254425	-2.92423	1.18375e-12	-3.38819	9.56699e-17	27.1756	10.0617	1.32634					nucl 17.5, cyto_nucl 11, mito 4, cyto 3.5
proteinId241512	-0.889182	0.057104	-1.09968	0.0107199	-0.210494	0.663882	16.8817	16.1563	7.68622	KOG3020	TatD-related DNase	Replication, recombination and repair	INFORMATION STORAGE AND PROCESSING	nucl 19, cyto_nucl 13.5, cyto 6	TatD_DNase
proteinId241585	-0.546139	0.300662	-2.38285	8.42659e-08	-1.83672	4.98083e-05	428.431	323.611	62.5118	KOG1216	von Willebrand factor and related coagulation proteins	Extracellular structures	CELLULAR PROCESSES AND SIGNALING	cyto 15, mito 7, extr 4
proteinId241664	0.977459	0.470839	1.94732	0.0890591	0.969861	0.392656	1.25215	0.306205	1.30947					mito 19, nucl 5, cyto 3
proteinId241701	-0.513577	0.293036	-3.77198	2.40977e-18	-3.2584	7.31119e-14	54.3831	40.3989	2.94975					cyto 9.5, cyto_nucl 8.5, cysk 8, nucl 4.5, pero 4	DHDPS
proteinId241742	1.23978	0.0616998	4.72933	1.70537e-16	3.48956	2.62074e-11	5.18211	1.1177	31.8953					mito 18, cyto_nucl 5, nucl 4, cyto 4
proteinId241770	1.50822	0.134628	-0.774633	0.472659	-2.28286	0.01878	3.78534	0.652188	0.374575					mito 11.5, mito_nucl 10.833, nucl 9, cyto_nucl 7.833, cyto 5.5
proteinId241802	0.540184	0.687711	3.2998	0.00136504	2.75962	0.00666597	2.59326	0.880015	9.94542	KOG2294	Transcription factor of the Forkhead/HNF3 family	Transcription	INFORMATION STORAGE AND PROCESSING	extr 16, mito 6, cyto 3.5, cyto_nucl 3
proteinId241924	2.32437	2.68851e-05	3.50465	2.33238e-11	1.18028	0.0315261	145.679	14.5828	175.406					cysk 25, cyto 1.5, cyto_nucl 1.5
proteinId242038	5.19524	3.08797e-08	4.43014	1.48583e-06	-0.765102	0.21219	13.9198	0.159384	4.22117					nucl 14, cyto_nucl 11, cyto 6, mito 4
proteinId242076	1.24747	0.17882	2.19801	0.00726589	0.950544	0.269375	8.43869	1.81177	8.89928	KOG4157	beta-1,6-N-acetylglucosaminyltransferase, contains WSC domain	Carbohydrate transport and metabolism	METABOLISM	nucl 14, cyto_nucl 10, mito 7, cyto 4
proteinId242096	1.74375	0.0179216	7.37029	9.61338e-31	5.62653	3.61043e-29	3.00254	0.427172	82.0573					nucl 20.5, cyto_nucl 11.5, mito 3
proteinId242105	1.10013	0.477614	-0.23758	0.879594	-1.33771	0.337074	4.2586	0.94607	0.818523	KOG0800	FOG: Predicted E3 ubiquitin ligase	Posttranslational modification, protein turnover, chaperones	CELLULAR PROCESSES AND SIGNALING	nucl 13, mito 4, plas 4, cyto 2, pero 2, cyto_pero 2
proteinId242308	-0.131545	0.892689	-0.289642	0.730165	-0.158097	0.854773	2.66027	1.47952	1.22459					cyto_nucl 10.5, nucl 9.5, cyto 8.5, mito 3, extr 2, pero 2
proteinId242371	6.37626	5.46305e-05	7.43616	7.54617e-07	1.0599	0.0761841	4.52818	0	4.98522					plas 17, mito 4, extr 2, E.R. 2, mito_nucl 2
proteinId242424	-3.77109	5.2206e-09	-1.10751	0.0894702	2.66358	3.03845e-05	19.6654	149.182	69.7003	KOG1198	Zinc-binding oxidoreductase	General function prediction only	POORLY CHARACTERIZED	cyto 24, pero 2	ADH_zinc_N,ADH_zinc_N_2
proteinId242436	1.76081	2.16097e-10	2.64444	4.94963e-23	0.88363	0.00122852	53.3238	8.01122	51.4914	KOG2133	Transcriptional corepressor Atrophin-1/DRPLA	General function prediction only	POORLY CHARACTERIZED	nucl 20, cyto 4, mito 3
proteinId242534	3.1736	7.04409e-05	-1.83063	0.0645701	-5.00423	3.97612e-08	18.7771	0.997449	0.252509					plas 14, mito 6, pero 2, E.R. 2, golg 2
proteinId242592	-0.905066	0.1884	2.96066	1.67506e-07	3.86573	8.63964e-12	2.49704	2.41637	19.9274					nucl 18, cyto_nucl 12.5, cyto 5, mito 4
proteinId242602	-0.266273	0.726545	-1.26593	0.0353426	-0.99966	0.107636	37.1042	22.3844	9.39931	KOG4157	beta-1,6-N-acetylglucosaminyltransferase, contains WSC domain	Carbohydrate transport and metabolism	METABOLISM	extr 26
proteinId242884	NA	NA	NA	NA	NA	NA	0	0	0					plas 10, E.R. 5, nucl 4, mito 4, mito_nucl 4
proteinId242929	-0.072747	0.970941	0.315355	0.847734	0.388102	0.807764	0.809563	0.445871	0.578416					mito 16.5, cyto_mito 11.333, cyto 5, nucl 4, cyto_pero 3.333
proteinId242941	0.0536021	0.977644	-1.90783	0.210967	-1.96143	0.202878	1.23111	0.609428	0.139139	KOG1187	Serine/threonine protein kinase	Signal transduction mechanisms	CELLULAR PROCESSES AND SIGNALING	mito 17.5, cyto_mito 11.333, cyto_nucl 4.833, nucl 4.5, cyto 4
proteinId242972	1.24705	0.263101	-1.48394	0.135847	-2.73099	0.00537586	89.4712	19.3942	6.70363	KOG1175	Acyl-CoA synthetase	Lipid transport and metabolism	METABOLISM	cyto 10, cysk 6, pero 5, nucl 4	AMP-binding
proteinId243040	2.26223	3.05564e-07	6.1848	8.90217e-51	3.92257	1.48565e-28	13.5213	1.4119	108.357					mito 11.5, mito_nucl 11.5, nucl 10.5, cyto 4	BTB
proteinId24326	0.31664	0.43727	0.793495	0.0208372	0.476855	0.184855	69.4216	28.4617	50.4276	KOG1674	Cyclin	General function prediction only	POORLY CHARACTERIZED	nucl 19.5, cyto_nucl 12.5, cyto 4.5	Cyclin
proteinId243332	3.95806	0.0109632	-0.0131145	0.998233	-3.97117	0.00713815	3.88639	0.0905826	0.093889					nucl 13, cyto 6, extr 5, mito 2
proteinId243522	5.64354	0.00524248	3.67563	0.0603968	-1.96791	0.242765	2.76385	0	0.315787					plas 14, mito 11
proteinId243607	1.28081	0.434554	-0.699172	0.665435	-1.97998	0.186021	1.49308	0.289849	0.172848					cyto 9, nucl 7, mito 3, extr 3, golg 2, plas 1, E.R. 1, cysk 1
proteinId243635	4.52696	7.70866e-05	9.87419	1.7341e-20	5.34724	2.16928e-47	5.06881	0.0607701	110.295					cyto 10.5, extr 7, cyto_nucl 7, mito 3, cysk 3, nucl 2.5
proteinId24386	-0.169715	0.770359	-2.55336	1.33842e-08	-2.38364	1.4547e-07	33.4301	19.2267	3.26142	KOG1342	Histone deacetylase complex, catalytic component RPD3	Chromatin structure and dynamics	INFORMATION STORAGE AND PROCESSING	cyto 15, cyto_nucl 13.5, nucl 10	Hist_deacetyl
proteinId243912	-1.3231	0.000667866	1.44486	7.28391e-05	2.76795	2.15959e-14	12.9329	16.5594	46.2521	KOG0462	Elongation factor-type GTP-binding protein	Translation, ribosomal structure and biogenesis	INFORMATION STORAGE AND PROCESSING	mito 15, cyto 6, nucl 5	GTP_EFTU,LepA_C,EFG_C,GTP_EFTU_D2,MMR_HSR1
proteinId244000	1.64887	0.0800291	-0.72266	0.480592	-2.37153	0.00950279	5.07934	0.79924	0.483988					mito 12, nucl 4, cyto 3, plas 3, extr 2, cyto_pero 2
proteinId244219	1.1012	0.0221721	-1.80669	0.000107755	-2.90789	2.26468e-10	29.3359	6.98379	1.99871					plas 14, extr 7, E.R. 3, mito 1, cyto 1, pero 1, cyto_mito 1, cyto_pero 1
proteinId244358	0.150676	0.730384	1.83886	2.52655e-08	1.68819	2.94173e-07	24.5886	11.2982	41.4607	KOG2266	Chromatin-associated protein Dek and related proteins, contains SAP DNA binding domain	Chromatin structure and dynamics	INFORMATION STORAGE AND PROCESSING	nucl 22.5, cyto_nucl 14, cyto 4.5	PAPA-1
proteinId244482	0.847353	0.0221721	0.767724	0.0288606	-0.0796288	0.838681	7.86647	2.23296	3.89652	KOG1001	Helicase-like transcription factor HLTF/DNA helicase RAD5, DEAD-box superfamily	Replication, recombination and repair	INFORMATION STORAGE AND PROCESSING	nucl 12.5, cyto_nucl 12, cyto 10.5, mito 3	SNF2_N,HIRAN,Helicase_C,ResIII
proteinId244609	0.432778	0.678158	-1.30874	0.127538	-1.74152	0.0423828	4.09904	1.54571	0.606827	KOG1216	von Willebrand factor and related coagulation proteins	Extracellular structures	CELLULAR PROCESSES AND SIGNALING	nucl 20, cyto_nucl 12, mito 5
proteinId244647	8.66825	1.11307e-29	5.69971	8.88205e-14	-2.96854	3.18518e-12	181.337	0.188817	12.0579					cyto 21, mito 4
proteinId244930	2.29042	0.0704126	2.73366	0.018373	0.443242	0.715183	5.20464	0.475894	3.72396					mito 23, extr 2, cyto 1.5, cyto_nucl 1.5
proteinId244988	1.56171	0.000432458	5.15723	3.71674e-38	3.59553	2.32105e-27	8.47335	1.45281	54.2932					plas 9, extr 7, E.R. 5, mito 2, cyto 2, cyto_mito 2
proteinId245152	0.0331185	0.964184	-0.749777	0.168612	-0.782896	0.158696	116.203	59.2884	35.841	KOG0619	FOG: Leucine rich repeat	General function prediction only	POORLY CHARACTERIZED	extr 16, cyto 5.5, mito 4, cyto_nucl 3.5
proteinId245164	2.27425	NA	3.21918	0.145128	0.944932	0.662693	0.328314	0	0.398562					mito 16, extr 3, cyto 2, plas 2, E.R. 2
proteinId245186	-0.320252	0.533579	-5.69655	1.00314e-20	-5.3763	1.9788e-18	31.573	20.4084	0.364585					plas 14, E.R. 5, mito 3, extr 3
proteinId245272	2.05435	0.00969157	1.1319	0.153108	-0.922448	0.213807	7.21939	0.857504	1.96091					cysk 16, nucl 6, mito 3
proteinId245358	3.75276	1.26026e-14	0.755588	0.163029	-2.99717	3.30789e-11	54.5125	2.00321	3.48716					extr 12, plas 5, E.R. 5, golg 3
proteinId24540	0.503437	0.192597	0.303444	0.403477	-0.199993	0.599006	58.9273	21.3695	26.9928	KOG1430	C-3 sterol dehydrogenase/3-beta-hydroxysteroid dehydrogenase and related dehydrogenases	Lipid transport and metabolism	METABOLISM	cyto 12.5, cyto_mito 11, mito 8.5, nucl 2, extr 2	RmlD_sub_bind,Epimerase,NAD_binding_4,NAD_binding_10,3Beta_HSD,Polysacc_synt_2
proteinId24552	0.277419	0.538908	2.90744	2.44247e-16	2.63002	7.92679e-14	43.38	18.4825	143.31					nucl 11.5, cyto_nucl 10.5, cyto 8.5, mito 3, pero 2
proteinId245521	-0.933636	0.00853475	-4.52354	4.84862e-40	-3.58991	2.06895e-25	64.3277	63.2089	2.76002	KOG2266	Chromatin-associated protein Dek and related proteins, contains SAP DNA binding domain	Chromatin structure and dynamics	INFORMATION STORAGE AND PROCESSING	nucl 14, mito 8, cyto 4
proteinId245597	0.458571	0.398655	0.602513	0.211321	0.143941	0.780535	6.35439	2.35746	3.68003	KOG2806	Chitinase	Carbohydrate transport and metabolism	METABOLISM	mito 13, nucl 10, cyto 4
proteinId245998	-1.30149	0.0875052	2.21002	0.000529441	3.51151	5.92311e-08	1.2496	1.61452	7.89335					mito 13, cyto 7, cyto_nucl 7, nucl 5
proteinId246033	-1.86944	0.00534847	-2.88106	3.24787e-05	-1.01162	0.181074	3.27294	6.26569	0.820603					mito 12, extr 8, pero 4, nucl 1, cyto 1, plas 1, cyto_nucl 1
proteinId24607	-0.105646	0.786835	0.782911	0.00935484	0.888557	0.0032696	32.5343	17.8832	31.5348	KOG2636	Splicing factor 3a, subunit 3	RNA processing and modification	INFORMATION STORAGE AND PROCESSING	nucl 22.5, cyto_nucl 13.5, cyto 3.5	DUF3449,SF3a60_bindingd,zf-C2H2_jaz,zf-met
proteinId246106	1.49137	0.00299818	5.80545	7.07127e-37	4.31408	1.99903e-21	48.0593	8.69039	519.46					extr 12, plas 7, mito 2, E.R. 2, nucl 1, cyto 1, cyto_nucl 1, pero 1, golg 1, cyto_pero 1
proteinId246115	0.763743	NA	-1.29216	0.601056	-2.0559	0.40705	0.319658	0.073359	0					plas 9, extr 6, mito 3, pero 3, E.R. 3, cyto 1, golg 1, vacu 1
proteinId246134	-0.457175	0.253375	-1.77515	2.88165e-07	-1.31798	0.000183912	35.2415	24.8692	7.38859	KOG1878	Nuclear receptor coregulator SMRT/SMRTER, contains Myb-like domains	Transcription	INFORMATION STORAGE AND PROCESSING	extr 16, mito 4, nucl 3, cyto 3, cyto_nucl 3
proteinId246327	1.65084	0.000308507	1.90944	1.15202e-05	0.258594	0.582516	10.9721	1.7681	6.86926	KOG2146	Splicing coactivator SRm160/300, subunit SRm160 (contains PWI domain)	General function prediction only	POORLY CHARACTERIZED	nucl 13.5, cyto_nucl 11, cyto 7.5, mito 6
proteinId246337	2.22735	NA	2.64166	0.25613	0.414309	0.868188	0.459633	0	0.371036	KOG4217	Nuclear receptors of the nerve growth factor-induced protein B type	Transcription	INFORMATION STORAGE AND PROCESSING	nucl 18, cyto_nucl 12.5, cyto 5, mito 3
proteinId246408	2.89436	4.73121e-08	2.77642	7.10346e-08	-0.117945	0.837665	20.6822	1.39479	10.025	KOG0260	RNA polymerase II, large subunit	Transcription	INFORMATION STORAGE AND PROCESSING	nucl 20.5, cyto_nucl 12.5, cyto 3.5
proteinId246425	-1.41622	0.000108952	-0.219719	0.56444	1.1965	0.000785726	21.4051	29.5283	25.8854					nucl 19.5, cyto_nucl 12.5, cyto 4.5
proteinId246794	-0.764361	0.0602146	-2.71105	7.10335e-13	-1.94669	3.92806e-07	22.9629	19.9008	3.06453	KOG0376	Serine-threonine phosphatase 2A, catalytic subunit	General function prediction only	POORLY CHARACTERIZED	nucl 10.5, cyto_nucl 8.5, mito 8, cyto 5.5	Metallophos,PPP5,TPR_11,TPR_1,TPR_2,TPR_17
proteinId246903	1.54077	0.0113832	-0.478687	0.462767	-2.01945	0.000541726	9.28471	1.61817	1.18526	KOG1414	Transcriptional activator FOSB/c-Fos and related bZIP transcription factors	Transcription	INFORMATION STORAGE AND PROCESSING	nucl 26, cyto_nucl 14.5	bZIP_1,bZIP_2
proteinId246904	4.93496	0.00440639	7.08075	1.0159e-05	2.1458	0.00940229	5.28316	0	12.9318					plas 14, mito 7, E.R. 5
proteinId246917	1.08578	0.338671	1.38329	0.171129	0.297513	0.777608	4.64374	1.09283	3.0665					mito 9, cyto 8.5, nucl 7, cyto_pero 5
proteinId246960	-5.33129	7.04067e-33	-8.91912	1.10912e-69	-3.58782	4.68545e-12	39.7642	861.464	1.68162	KOG1216	von Willebrand factor and related coagulation proteins	Extracellular structures	CELLULAR PROCESSES AND SIGNALING	nucl 20, cyto_nucl 13.5, cyto 5
proteinId247054	1.99555	NA	1.65552	0.434836	-0.340031	0.877868	0.856626	0.0623258	0.339127					nucl 13.5, cyto_nucl 12, cyto 9.5, mito 2
proteinId247142	1.5017	0.450892	4.25053	0.00896153	2.74883	0.0572039	0.501292	0.060021	2.12366					mito 12, nucl 5, cyto 4, plas 3, cyto_pero 3
proteinId247143	-2.56769	1.348e-05	-2.64043	5.36821e-06	-0.0727463	0.918883	2.45296	7.59068	1.21338	KOG1286	Amino acid transporters	Amino acid transport and metabolism	METABOLISM	plas 26	AA_permease,AA_permease_2
proteinId247162	-0.361019	0.699726	0.377878	0.63737	0.738897	0.350233	29.9972	19.6673	26.5671					nucl 13, cyto_nucl 13, cyto 9, mito 2, extr 2
proteinId247332	0.134637	0.934132	-0.0269034	0.998233	-0.16154	0.90857	0.849454	0.395751	0.398578	KOG1721	FOG: Zn-finger	General function prediction only	POORLY CHARACTERIZED	nucl 18.5, cyto_nucl 11.5, mito 5	zf-H2C2_2
proteinId247395	3.44149	0.000131795	4.30992	4.33688e-07	0.868428	0.200325	5.53078	0.232011	5.41524					nucl 22, cyto_nucl 14.5, cyto 5
proteinId247452	2.59643	0.0452082	4.03294	0.000582234	1.43652	0.165026	4.26047	0.30896	6.46053					mito 18, cyto 4, nucl 2, plas 2, cyto_pero 2
proteinId247469	-0.871859	0.00618132	-0.729623	0.0153869	0.142237	0.673944	118.538	110.753	68.0452	KOG0602	Neutral trehalase	Carbohydrate transport and metabolism	METABOLISM	mito 15.5, cyto_mito 10.5, nucl 5, cyto 4.5	Trehalase,Trehalase_Ca-bi
proteinId247626	-0.0793389	0.862045	0.393669	0.27374	0.473008	0.191929	9.42432	5.11352	6.85627	KOG4269	Rac GTPase-activating protein BCR/ABR	Signal transduction mechanisms	CELLULAR PROCESSES AND SIGNALING	nucl 20.5, cyto_nucl 13.5, cyto 5.5	RhoGAP,PH
proteinId247680	-0.340783	0.489922	0.610629	0.145582	0.951412	0.0213112	2.53161	1.65045	2.58741	KOG3519	Invasion-inducing protein TIAM1/CDC24 and related RhoGEF GTPases	Signal transduction mechanisms	CELLULAR PROCESSES AND SIGNALING	nucl 23.5, cyto_nucl 14	RhoGEF,BAR
proteinId247997	-1.18153	0.000273436	-1.51138	1.0034e-06	-0.329847	0.333762	68.5695	79.9714	28.562	KOG0092	GTPase Rab5/YPT51 and related small G protein superfamily GTPases	Intracellular trafficking, secretion, and vesicular transport	CELLULAR PROCESSES AND SIGNALING	mito 18, extr 6, pero 2	Ras,Miro,Arf,GTP_EFTU,Gtr1_RagA,MMR_HSR1
proteinId248046	4.94056	0.0250017	1.9969	0.368964	-2.94366	0.122942	2.0838	0	0.0983587					extr 14, mito 10.5, cyto_mito 7
proteinId24824	0.089652	0.835977	-3.03951	1.01688e-18	-3.12917	1.02956e-19	49.9645	24.0772	2.96159	KOG0526	Nucleosome-binding factor SPN, POB3 subunit	Chromatin structure and dynamics	INFORMATION STORAGE AND PROCESSING	cyto 17.5, cyto_nucl 12, nucl 5.5, pero 3	SSrecog,Rtt106
proteinId248295	1.84091	0.237146	3.82826	0.00410212	1.98736	0.084844	1.58611	0.17666	3.55911					mito 15, cyto 8, mito_nucl 8
proteinId248370	0.237205	0.901099	5.55609	2.1935e-05	5.31889	6.5927e-06	0.418846	0.159646	11.4203					nucl 18, cyto_nucl 13.5, cyto 7
proteinId248386	5.1592	0.000647234	11.0397	2.86223e-15	5.88049	8.81851e-38	5.08757	0	161.392					nucl 9.5, cyto_nucl 8.833, mito 7, cyto 7, cyto_pero 5.333
proteinId248403	-0.0924008	0.878582	0.888147	0.0534741	0.980548	0.0351899	13.7019	7.38915	14.115	KOG0054	Multidrug resistance-associated protein/mitoxantrone resistance protein, ABC superfamily	Secondary metabolites biosynthesis, transport and catabolism	METABOLISM	plas 21, mito 3, vacu 2	ABC_tran,ABC_membrane,SMC_N,AAA_25
proteinId248415	-0.5449	NA	-0.603199	0.813614	-0.0582992	0.982429	0.215091	0.200792	0.101654					mito 19, nucl 6
proteinId24843	1.55768	0.00387587	5.55259	1.04084e-30	3.99491	8.02341e-21	23.3214	3.99336	201.011					plas 13, mito 7, E.R. 3, golg 2, vacu 2
proteinId248457	-0.033489	0.975643	-3.57018	0.000181364	-3.53669	0.000220804	4.77618	2.49496	0.19095					mito 10, nucl 7, cyto_mito 7, cyto 4, plas 4
proteinId248529	0.831535	0.0657304	0.293541	0.51364	-0.537994	0.214921	6.02224	1.71326	2.14584	KOG2029	Uncharacterized conserved protein	Function unknown	POORLY CHARACTERIZED	nucl 19.5, cyto_nucl 13, cyto 5.5
proteinId248568	1.48421	0.237974	8.46954	2.80353e-17	6.98533	1.0649e-25	0.672136	0.0990268	49.3156					plas 18, E.R. 4, mito 2, golg 2
proteinId248587	1.44663	0.0122094	3.58179	7.42694e-12	2.13516	4.03728e-05	27.1981	5.07833	64.5661					mito 13, nucl 5, cyto 5, cyto_nucl 5
proteinId248647	4.48043	1.94744e-17	3.41765	5.9908e-11	-1.06278	0.0367253	53.0117	1.1448	12.9345	KOG4157	beta-1,6-N-acetylglucosaminyltransferase, contains WSC domain	Carbohydrate transport and metabolism	METABOLISM	plas 12, extr 8, E.R. 3, mito 2, cyto 2, cyto_mito 2
proteinId248681	6.27109	7.89427e-14	9.06364	7.27952e-29	2.79256	1.56733e-11	45.3168	0.22486	166.249					mito 12, nucl 9.5, cyto_nucl 7.5, cyto 4.5
proteinId248685	1.12761	0.101307	1.43211	0.0227413	0.304506	0.648794	6.71192	1.55873	4.35604					cyto 13, cyto_nucl 10.5, nucl 6, extr 3, mito 2, cysk 2
proteinId248707	0.183696	0.649725	1.82778	5.16727e-09	1.64409	1.59103e-07	37.2709	16.913	61.7582					cyto_pero 8.666, cyto 8.5, cyto_nucl 8.333, pero 7.5, nucl 6, cysk 5
proteinId248731	-0.67801	0.193052	-2.20864	5.57405e-06	-1.53063	0.00209282	9.57516	7.88394	1.71507	KOG0758	Mitochondrial carnitine-acylcarnitine carrier protein	Energy production and conversion	METABOLISM	mito 13, extr 6, cyto 4, plas 3	Mito_carr
proteinId2488	-1.86419	NA	-1.62326	0.483344	0.24093	0.923256	0	0.0885175	0					mito 17, nucl 5, cyto 5, cyto_nucl 5
proteinId248856	8.17143	2.23494e-12	4.21273	0.000347553	-3.9587	1.61566e-12	26.3421	0.0251801	0.850176					nucl 15, cyto 7, mito 3
proteinId248889	-0.0668826	0.92361	2.76667	1.33577e-08	2.83356	3.86662e-09	12.7443	6.84513	48.5907					mito 22, nucl 3
proteinId249026	0.0560686	0.882545	-0.900773	0.00178975	-0.956841	0.00095532	39.4403	19.4067	10.6044	KOG1720	Protein tyrosine phosphatase CDC14	Defense mechanisms	CELLULAR PROCESSES AND SIGNALING	mito 21.5, cyto_mito 13, cyto 3.5	DSPn,DSPc
proteinId249283	2.33855	0.055553	3.86069	0.000433377	1.52214	0.117002	1.64418	0.138625	2.54555					extr 12, mito 4, plas 4, nucl 2, cyto 1, pero 1, E.R. 1, golg 1, vacu 1, cyto_pero 1
proteinId249358	3.95035	2.36437e-07	4.28419	6.56077e-09	0.333842	0.589387	10.0959	0.310106	6.74661					mito 12, cyto 6, nucl 3, plas 2, extr 1, pero 1, E.R. 1, golg 1
proteinId249364	3.657	2.09981e-14	3.73611	1.8458e-15	0.0791085	0.86316	20.7164	0.80786	11.4382					cyto 9, nucl 8, mito 5, plas 5
proteinId249443	-1.23278	4.88864e-05	-5.16946	2.71542e-65	-3.93668	5.82049e-38	156.884	190.364	5.31576	KOG1752	Glutaredoxin and related proteins	Posttranslational modification, protein turnover, chaperones	CELLULAR PROCESSES AND SIGNALING	nucl 18, mito 9, cyto_nucl 9
proteinId249466	-0.895425	0.304154	-2.24354	0.0036469	-1.34811	0.0949699	9.45647	9.13262	1.90243					mito 18, nucl 3, cyto 3, cyto_nucl 3
proteinId249513	3.9016	0.000123927	2.96973	0.00280792	-0.931865	0.287333	6.98954	0.204799	1.86432					mito 21, cyto 4
proteinId249560	0.00230902	0.997567	1.2058	0.0354285	1.2035	0.0371375	9.52814	4.92838	11.7025	KOG1830	Wiskott Aldrich syndrome proteins	Cytoskeleton	CELLULAR PROCESSES AND SIGNALING	mito 15, cyto 6.5, cyto_nucl 5.5, nucl 3.5
proteinId249646	7.20167	1.57631e-17	8.8037	1.51681e-26	1.60203	0.00603247	13.9382	0.0362491	22.0488					nucl 17, cyto_nucl 12.5, cyto 6, pero 2	DUF4470
proteinId249717	2.78051	2.30855e-07	2.77084	1.11344e-07	-0.00967239	0.986618	18.0271	1.30743	9.43361					mito 14, cyto_nucl 8, nucl 7.5, cyto 5.5
proteinId249844	-0.412886	0.691262	1.11615	0.174832	1.52903	0.0570027	1.5585	1.07357	2.43072					mito 11, extr 6, cyto 4, plas 3, cyto_nucl 3
proteinId249852	1.94794	NA	-0.0104744	0.998233	-1.95842	0.41311	0.312619	0	0					mito 14, nucl 11.5, cyto_nucl 7
proteinId249857	-0.559581	0.544498	-0.0540175	0.962916	0.505564	0.543942	7.08598	5.44664	5.40956					nucl 15.5, cyto_nucl 11.5, cyto 6.5, mito 5
proteinId249864	-0.237733	0.535423	-5.32167	4.80762e-62	-5.08394	2.55741e-56	142.056	86.347	2.15183	KOG2588	Predicted DNA-binding protein	Transcription	INFORMATION STORAGE AND PROCESSING	nucl 15.5, cyto_nucl 10.5, cyto 4.5, mito 3, plas 1, pero 1, E.R. 1, golg 1	DUF2014,HLH
proteinId250026	-0.882034	0.0370845	-3.76703	1.62928e-19	-2.885	8.12745e-12	22.0066	20.8043	1.53264	KOG3771	Amphiphysin	Intracellular trafficking, secretion, and vesicular transport	CELLULAR PROCESSES AND SIGNALING	nucl 12, cyto 9.5, cyto_mito 8, mito 5.5	BAR,SH3_1,SH3_9,SH3_2
proteinId250153	0.249075	0.863017	3.60969	0.000682324	3.36062	0.00149959	3.24062	1.38851	20.3623					mito 9, plas 5, nucl 3, extr 3, E.R. 3, cyto 2
proteinId250161	0.827208	0.0986505	1.51405	0.000724944	0.686846	0.14265	11.544	3.29958	9.74402	KOG1187	Serine/threonine protein kinase	Signal transduction mechanisms	CELLULAR PROCESSES AND SIGNALING	nucl 16, cyto_nucl 11, mito 7, cyto 4
proteinId250212	0.882595	0.242483	2.82918	9.08126e-06	1.94658	0.00125708	3.32597	0.915872	6.89378					nucl 15, cyto_nucl 15, cyto 11
proteinId250270	2.66751	NA	4.2207	0.0389687	1.55319	0.390794	0.453562	0	0.834061					plas 10, extr 7, mito 6, E.R. 2
proteinId250594	2.05849	0.170993	6.67047	1.03489e-07	4.61199	6.85089e-09	0.879017	0.0695601	12.1907					mito 20, cyto 4, cyto_nucl 3.5
proteinId250606	1.84627	5.37715e-06	-2.84782	2.3499e-10	-4.69409	1.82467e-26	46.9491	6.65204	0.920584	KOG2510	SWI-SNF chromatin-remodeling complex protein	Chromatin structure and dynamics	INFORMATION STORAGE AND PROCESSING	nucl 24, cyto_nucl 14.5	GATA
proteinId250651	3.62963	3.86944e-06	6.06308	2.79534e-16	2.43345	3.82139e-06	10.4414	0.389505	30.2739	KOG1187	Serine/threonine protein kinase	Signal transduction mechanisms	CELLULAR PROCESSES AND SIGNALING	cyto 9.5, cyto_nucl 9, mito 8, nucl 7.5
proteinId250760	3.63388	0.110526	3.99053	0.0547865	0.356643	0.866435	1.74367	0	1.26977					mito 18, nucl 5, cyto_nucl 4.5, cyto 2, plas 2
proteinId250761	2.07119	NA	-0.00526705	0.998233	-2.07646	0.387416	0.398355	0	0					mito 21, cyto_nucl 3, nucl 2.5, cyto 2.5
proteinId250815	4.68095	3.08043e-09	6.48737	1.34124e-17	1.80642	0.00529006	43.2644	0.734345	79.2252					plas 13, mito 6, E.R. 6
proteinId250922	0.179869	0.718185	-2.91905	2.43274e-13	-3.09892	8.48066e-15	50.1876	22.8566	3.03263	KOG0082	G-protein alpha subunit (small G protein superfamily)	Signal transduction mechanisms	CELLULAR PROCESSES AND SIGNALING	nucl 16, cyto_nucl 13, cyto 8	G-alpha,Arf
proteinId251006	0.0404449	0.974943	1.7611	0.0516425	1.72066	0.0506124	0.978287	0.488185	1.76297					nucl 18, mito 7
proteinId251655	1.68825	0.194216	0.282204	0.839461	-1.40605	0.243209	1.70122	0.248344	0.319059					mito 11, nucl 9, cyto_nucl 8.5, cyto 6
proteinId251685	11.7524	3.35697e-21	11.1964	5.61681e-20	-0.556051	0.11905	195.177	0	68.9756					mito 10, nucl 7, cyto 5, pero 5, cyto_pero 5
proteinId251746	-0.449697	0.427983	-1.16667	0.0145517	-0.716978	0.152319	121.31	86.7491	38.9464	KOG4293	Predicted membrane protein, contains DoH and Cytochrome b-561/ferric reductase transmembrane domains	Signal transduction mechanisms	CELLULAR PROCESSES AND SIGNALING	extr 20, mito 3, cyto 2, vacu 2	SUN
proteinId251797	1.05866	0.668785	2.35402	0.245494	1.29536	0.536761	0.977097	0.172058	1.50481					mito 17.5, cyto_mito 12.5, cyto 6.5
proteinId251809	-0.483762	0.796993	3.69331	0.00567819	4.17707	0.00132749	0.337452	0.255522	4.17129					plas 18, mito 4, extr 3, cyto_mito 3
proteinId252018	0.94434	0.448418	4.43272	5.23161e-06	3.48838	1.7634e-05	0.918353	0.230373	5.79644					mito 11, nucl 6, pero 5, cyto 2, plas 2
proteinId252067	1.09875	NA	-0.00889727	0.998233	-1.10765	0.649516	0.0743799	0	0					mito 22, nucl 2, extr 2
proteinId252079	0.69322	0.232332	-5.04865	1.26882e-15	-5.74186	9.54962e-20	20.5944	6.46464	0.178104					nucl 12, mito 11, cyto_nucl 9, cyto 4
proteinId25218	2.57463	0.0109836	3.5529	0.000145325	0.978266	0.289427	2.14188	0.165382	2.22993	KOG0032	Ca2+/calmodulin-dependent protein kinase, EF-Hand protein superfamily	Signal transduction mechanisms	CELLULAR PROCESSES AND SIGNALING	nucl 18.5, cyto_nucl 13, cyto 6.5	Pkinase,Pkinase_Tyr,FHA
proteinId252291	2.96269	2.08621e-07	7.90094	8.31984e-50	4.93825	8.001e-38	4.03799	0.249705	65.885	KOG1721	FOG: Zn-finger	General function prediction only	POORLY CHARACTERIZED	cyto 9, cyto_nucl 9, nucl 7, pero 7, mito 3	BTB
proteinId252356	0.378081	0.439256	-4.55456	1.15764e-14	-4.93264	5.5038e-17	39.8047	15.5983	0.626874					mito 12, extr 7, nucl 4, golg 2
proteinId252363	0.152814	0.777994	-2.00359	1.48746e-06	-2.15641	2.54338e-07	160.545	74.6473	18.8171	KOG3104	Mod5 protein sorting/negative effector of RNA Pol III synthesis	Transcription	INFORMATION STORAGE AND PROCESSING	nucl 17, cyto_nucl 12.5, cyto 6, mito 3	Maf1
proteinId25240	-0.263128	0.54097	0.295854	0.429958	0.558983	0.127929	26.1564	16.0585	20.1205	KOG2808	U5 snRNP-associated RNA splicing factor	RNA processing and modification	INFORMATION STORAGE AND PROCESSING	nucl 15.5, mito_nucl 10.833, cyto 6.5, cyto_mito 6.333, mito 5	Prp18,PRP4
proteinId252651	-0.989116	0.0942302	2.08016	4.25905e-05	3.06928	1.55791e-09	1.39525	1.4474	6.38257					plas 25	DUF1212,DUF3815
proteinId252656	-1.1095	0.0168408	-4.82626	3.68897e-20	-3.71676	2.75052e-12	23.0383	25.7843	0.88576	KOG0071	GTP-binding ADP-ribosylation factor Arf6 (dArf3)	Intracellular trafficking, secretion, and vesicular transport	CELLULAR PROCESSES AND SIGNALING	mito 18, cyto_nucl 4.333, cyto 4, nucl 3.5, cyto_pero 3.333	Arf,Ras,G-alpha,Gtr1_RagA,SRPRB,Miro
proteinId252843	2.50675	0.00319743	2.09612	0.00949063	-0.410628	0.645706	11.2553	0.929547	4.29674	KOG0613	Projectin/twitchin and related proteins	Cytoskeleton	CELLULAR PROCESSES AND SIGNALING	mito 9.5, mito_nucl 8.5, cyto 7, nucl 6.5, plas 1, extr 1, pero 1, E.R. 1
proteinId252853	-0.327512	0.545545	-2.34496	3.27366e-07	-2.01744	1.36238e-05	20.8298	13.3314	2.64441					mito 17.5, mito_nucl 10.5, cyto 3, nucl 2.5, cyto_pero 2.5	Anp1
proteinId252932	-0.623763	0.0884326	-0.118679	0.749742	0.505084	0.146966	31.1354	24.8174	23.28	KOG1869	Splicing coactivator SRm160/300, subunit SRm300	RNA processing and modification	INFORMATION STORAGE AND PROCESSING	nucl 22, cyto 3	DUF2457
proteinId253081	-1.25562	0.040653	-3.33459	3.59061e-09	-2.07897	0.00033573	42.7652	54.1613	5.24042					nucl 21, cyto_nucl 13.5, cyto 4
proteinId253129	0.892114	0.170515	2.71772	1.12125e-06	1.82561	0.000566663	0.927745	0.252078	1.73629	KOG3671	Actin regulatory protein (Wiskott-Aldrich syndrome protein)	Cytoskeleton	CELLULAR PROCESSES AND SIGNALING	nucl 24, cyto_nucl 14.5	TPR_12,TPR_11,TPR_10,TPR_1,TPR_2,TPR_14,TPR_16,TPR_7,TPR_19,TPR_6
proteinId253389	0.420989	0.557472	8.93681	2.92534e-59	8.51582	5.17665e-57	14.1189	5.42114	3005.29					mito 15, nucl 7.5, cyto_nucl 7.5, cyto 4.5
proteinId253406	0.959791	0.371858	1.1683	0.221347	0.208512	0.836826	4.4267	1.11386	2.64926					nucl 8.5, extr 8, cyto_nucl 7, cyto 4.5, mito 4
proteinId253427	3.19216	6.49098e-07	6.9586	4.36653e-31	3.76644	1.47205e-20	10.4104	0.531692	75.2983					plas 13, mito 7, E.R. 4, golg 2
proteinId253618	0.438075	0.510497	0.479141	0.41352	0.0410663	0.950963	6.66812	2.49241	3.55926	KOG1703	Adaptor protein Enigma and related PDZ-LIM proteins	Cytoskeleton	CELLULAR PROCESSES AND SIGNALING	nucl 19.5, cyto_nucl 12, mito 4	LIM
proteinId253739	1.57483	0.00960131	6.34147	1.19255e-32	4.76664	4.63661e-27	5.20435	0.86716	77.1286					nucl 11.5, mito 11, cyto_nucl 8.5, cyto 4.5
proteinId253770	4.96923	2.10007e-24	8.31542	2.9106e-68	3.34619	8.85805e-14	78.1532	1.20974	423.096	KOG4157	beta-1,6-N-acetylglucosaminyltransferase, contains WSC domain	Carbohydrate transport and metabolism	METABOLISM	extr 27	DUF1996,WSC
proteinId253832	-0.860177	NA	0.38835	0.826495	1.24853	0.456277	0.222171	0.224386	0.309717					mito 9, plas 8, E.R. 5, mito_nucl 5
proteinId253965	5.04912	3.48068e-07	9.27139	5.33858e-23	4.22228	2.83135e-18	3.37165	0.0346717	33.5339					nucl 14, mito 8, cyto 4
proteinId254288	1.18	NA	-0.00889727	0.998233	-1.1889	0.625726	0.0854287	0	0					nucl 15, cyto_nucl 11.5, mito 6, cyto 6
proteinId254294	0.471624	NA	-1.27223	0.60541	-1.74385	0.485228	0.171773	0.0528543	0					mito 17, extr 7, nucl 1, cyto 1, cyto_nucl 1, vacu 1
proteinId254303	-4.71303	2.04476e-14	-3.54	4.94672e-09	1.17303	0.068645	51.4959	739.262	62.467	KOG0335	ATP-dependent RNA helicase	RNA processing and modification	INFORMATION STORAGE AND PROCESSING	extr 19, plas 4, mito 2
proteinId254305	0.527625	0.740266	1.18211	0.365845	0.654486	0.628394	1.52211	0.52125	1.31567					nucl 13, cyto_nucl 10, mito 8, cyto 5
proteinId254314	0.552281	0.724117	1.57583	0.209286	1.02355	0.428987	2.15125	0.726835	2.4565					mito 15, nucl 4, cyto 3, golg 2, cyto_pero 2
proteinId254395	9.25885	2.72406e-18	8.54432	2.63872e-16	-0.714534	0.104201	178.32	0.0696845	56.1556					cyto 17, cyto_nucl 11.833, cyto_pero 9.333, nucl 5.5
proteinId254524	1.67401	0.000940154	5.57913	5.47693e-35	3.90512	1.88373e-27	4.89579	0.768366	38.9083					cyto 12.5, cyto_nucl 8, mito 6, nucl 2.5, plas 1, extr 1, pero 1, E.R. 1, golg 1, cysk 1
proteinId254574	0.0116849	0.976214	1.59819	2.95733e-09	1.58651	3.28299e-09	9.02075	4.59124	14.2572	KOG4456	Inner centromere protein (INCENP), C-terminal domain	Cell cycle control, cell division, chromosome partitioning	METABOLISM	nucl 20.5, cyto_nucl 13.5, cyto 3.5	INCENP_ARK-bind
proteinId254623	0.830788	NA	1.31541	0.57997	0.484621	0.853719	0.089786	0	0.0944118					mito 8, extr 6, plas 5, nucl 3, pero 2, E.R. 2
proteinId254637	1.14379	0.0235042	4.79771	4.50682e-27	3.65392	5.99492e-18	27.6957	6.30217	184.502					mito 8, plas 7, extr 7, E.R. 2, cyto 1, pero 1, golg 1, cyto_pero 1
proteinId254747	0.664425	0.485785	-0.627965	0.476014	-1.29239	0.124758	8.58748	2.69392	1.7536					mito 16, nucl 3, plas 3, extr 2, cyto_nucl 2, pero 2
proteinId254756	1.25873	0.135003	4.0078	1.92215e-08	2.74907	6.23521e-06	2.41556	0.501202	8.81561					plas 17, mito 4, E.R. 4
proteinId254875	0.115595	0.943095	-4.64467	0.0106415	-4.76026	0.00952759	1.97835	0.944061	0					cyto 9, nucl 7, mito 6, plas 2, pero 2
proteinId254951	-2.56574	0.243731	5.44792	0.000340247	8.01366	7.70571e-06	0	0.0706322	4.81038					plas 16, E.R. 4, mito 3, vacu 2, cyto_mito 2
proteinId254963	-0.425953	0.189543	-0.924623	0.00127233	-0.49867	0.0973665	12.4652	8.60588	4.60793	KOG1826	Ras GTPase activating protein RasGAP/neurofibromin	Defense mechanisms	CELLULAR PROCESSES AND SIGNALING	cyto 9, cyto_nucl 9, nucl 7, mito 5, plas 5	RasGAP,CRAL_TRIO_2
proteinId255161	0.64181	0.254565	-2.71203	1.83282e-06	-3.35384	2.29057e-09	13.2901	4.38531	0.660567	KOG1187	Serine/threonine protein kinase	Signal transduction mechanisms	CELLULAR PROCESSES AND SIGNALING	cyto_nucl 12.5, cyto 12, nucl 11, mito 3
proteinId255186	0.35089	0.459016	1.73677	6.61791e-06	1.38588	0.000287298	7.58644	3.03474	10.4068	KOG2510	SWI-SNF chromatin-remodeling complex protein	Chromatin structure and dynamics	INFORMATION STORAGE AND PROCESSING	nucl 14, mito 8, cyto_nucl 8	DUF2722
proteinId255250	0.0218388	0.958017	3.62094	1.07433e-36	3.5991	1.60594e-36	24.6349	12.5011	158.569	KOG4593	Mitotic checkpoint protein MAD1	Cell cycle control, cell division, chromosome partitioning	METABOLISM	nucl 23.5, cyto_nucl 14	MAD
proteinId255497	5.41121	9.23747e-06	7.63041	4.38005e-11	2.2192	0.000434071	3.14589	0.0216158	7.73833	KOG4297	C-type lectin	Signal transduction mechanisms	CELLULAR PROCESSES AND SIGNALING	nucl 13.5, mito 11, cyto_nucl 8.5
proteinId255633	3.20995	0.0639703	2.51513	0.127408	-0.694817	0.639934	2.32953	0.0833511	0.725041					extr 17, cyto 4, cyto_nucl 3.5, pero 3
proteinId255775	1.31912	0.581421	7.00746	0.000109214	5.68834	2.06557e-05	0.203093	0	7.61465					mito 14, extr 4, cyto 3.5, nucl 3, cyto_pero 2.5
proteinId255897	6.36722	3.67417e-08	8.8634	1.31394e-15	2.49618	6.49547e-06	12.1266	0.0371695	36.029					mito 17, nucl 6.5, cyto_nucl 5, cyto 2.5
proteinId256028	0.0215366	0.964184	-0.377003	0.29621	-0.398539	0.280284	29.7238	15.0462	11.7689	KOG2571	Chitin synthase/hyaluronan synthase (glycosyltransferases)	Cell wall/membrane/envelope biogenesis	CELLULAR PROCESSES AND SIGNALING	plas 22, mito 2, cyto 1, E.R. 1, golg 1, mito_nucl 1	Chitin_synth_2,Glyco_trans_2_3,Glyco_tranf_2_3,Cyt-b5
proteinId256144	-1.54305	0.000195039	-0.0709149	0.882143	1.47214	0.000228977	7.16709	10.7778	10.5112					nucl 16, cyto 6, plas 3, cyto_mito 3	Fungal_trans_2
proteinId256195	8.30491	5.2907e-10	12.9836	6.23672e-24	4.67871	6.85951e-17	46.1235	0	637.291					mito 19.5, cyto_mito 12.5, cyto 4.5
proteinId256221	-1.42059	0.0555535	3.16401	3.30475e-07	4.5846	4.65534e-13	1.83595	2.60722	24.8176					nucl 7, cyto 6.5, cyto_pero 5.5, mito 5, cysk 5, pero 3.5
proteinId256309	1.61613	0.0107516	6.58533	1.2173e-32	4.9692	1.81642e-28	7.30776	1.19036	124.46					plas 10, mito 8, extr 5, E.R. 3
proteinId256340	-0.240748	0.858836	1.39407	0.180484	1.63482	0.114108	1.55232	0.967799	2.72488					mito 17.5, cyto_mito 11.5, cyto 4.5, nucl 3
proteinId256353	3.33833	1.54823e-11	8.96594	8.67104e-81	5.62761	5.2946e-48	24.4613	1.19285	658.529					plas 16, mito 5, E.R. 5
proteinId256363	4.83192	0.00033412	5.24348	4.19761e-05	0.411562	0.649336	4.0477	0.0417957	2.88683					mito 13, cyto 9, nucl 3
proteinId256380	0.816066	0.425261	0.627795	0.50812	-0.18827	0.845561	5.0959	1.45949	2.3507					mito 14, plas 5, E.R. 3, cyto 2, extr 2
proteinId256791	2.41619	0.263709	6.16303	0.000671986	3.74684	0.00243574	0.216989	0	1.82108					nucl 13.5, cyto_nucl 13, cyto 9.5, mito 2
proteinId257215	3.45686	1.89836e-05	3.66737	2.28321e-06	0.210511	0.790594	13.0297	0.54768	7.82843	KOG4369	RTK signaling protein MASK/UNC-44	Signal transduction mechanisms	CELLULAR PROCESSES AND SIGNALING	nucl 16, cyto 5, mito 2, pero 2
proteinId257267	1.71881	0.000145287	0.298952	0.537802	-1.41986	0.00110416	12.2447	1.89419	2.39437	KOG1216	von Willebrand factor and related coagulation proteins	Extracellular structures	CELLULAR PROCESSES AND SIGNALING	nucl 20.5, cyto_nucl 13, cyto 4.5
proteinId257282	0.161227	0.890938	4.67044	3.81879e-09	4.50921	1.3391e-10	0.898752	0.396224	11.5375					mito 10, nucl 5.5, cyto_nucl 5.5, cyto 4.5, plas 4
proteinId257438	1.11338	0.214158	-3.06934	0.00228556	-4.18271	2.27762e-05	10.8771	2.53621	0.27261					extr 11, mito 10, cyto 6
proteinId257571	-0.968736	0.0304618	-0.501239	0.244179	0.467497	0.292912	235.03	234.334	169.315	KOG0370	Multifunctional pyrimidine synthesis protein CAD (includes carbamoyl-phophate synthetase, aspartate transcarbamylase, and glutamine amidotransferase)	General function prediction only	POORLY CHARACTERIZED	mito 21, cyto 5	CPSase_sm_chain,GATase
proteinId257576	-0.547822	0.528947	-4.8631	1.31217e-09	-4.31528	1.00939e-07	20.1407	15.1213	0.456215					cyto_nucl 7.5, cyto 7, nucl 6, mito 5, plas 4, extr 3
proteinId257617	4.06597	0.00532117	-2.16387	0.288486	-6.22985	0.000727681	8.15756	0.199503	0					mito 16, nucl 8.5, cyto_nucl 5.5
proteinId257621	6.23108	2.61427e-08	8.17317	2.93752e-14	1.94209	7.52476e-07	16.3653	0.0649128	33.1514					mito 13, nucl 10.5, cyto_nucl 7, cyto 2.5
proteinId258051	0.629465	0.0831033	-6.18227	1.8947e-40	-6.81173	1.15025e-48	102.566	34.0336	0.45249					extr 11, cyto 6.5, cyto_nucl 5, mito 4, pero 3
proteinId258097	0.796009	0.0114912	1.99851	2.76767e-12	1.2025	2.48209e-05	29.8019	8.74608	35.8828	KOG1216	von Willebrand factor and related coagulation proteins	Extracellular structures	CELLULAR PROCESSES AND SIGNALING	mito 11, nucl 4, extr 4, cyto 2, plas 2, E.R. 2
proteinId258254	0.103683	0.812791	-1.15724	0.000484819	-1.26093	0.00016301	724.103	346.982	158.286	KOG0837	Transcriptional activator of the JUN family	Transcription	INFORMATION STORAGE AND PROCESSING	nucl 21, cyto 4	bZIP_1,bZIP_2
proteinId258356	-0.0417136	0.963625	1.63427	0.0105907	1.67598	0.00726365	1.22461	0.649817	2.10807	KOG0528	HMG-box transcription factor SOX5	Transcription	INFORMATION STORAGE AND PROCESSING	nucl 23, mito 3	HMG_box
proteinId258449	-0.369884	0.351748	-0.947425	0.00497857	-0.577541	0.101816	381.735	251.491	132.348	KOG2992	Nucleolar GTPase/ATPase p130	Nuclear structure	CELLULAR PROCESSES AND SIGNALING	nucl 15.5, cyto_nucl 12.833, mito_nucl 9.166, cyto 8	PH_6
proteinId258497	3.13518	0.148763	4.8026	0.0125517	1.66742	0.275812	1.13898	0	2.10201					mito 20, nucl 3, extr 2, cyto_nucl 2
proteinId258632	0.202591	0.770486	0.29579	0.615823	0.0931987	0.881139	2.07431	0.92901	1.17289	KOG0351	ATP-dependent DNA helicase	Replication, recombination and repair	INFORMATION STORAGE AND PROCESSING	nucl 22.5, cyto_nucl 13, cyto 2.5	DEAD,Helicase_C,RQC
proteinId258656	2.72812	0.24713	4.46288	0.0301172	1.73477	0.363817	0.7157	0	1.61556					cyto_nucl 11.5, cyto 11, nucl 10, golg 3
proteinId258963	2.98773	0.00182809	1.42958	0.136818	-1.55815	0.0821555	7.50608	0.43208	1.24464					cyto 13, nucl 7, pero 4, mito 2
proteinId259041	1.23975	0.0146814	0.727202	0.1414	-0.512549	0.307342	13.9161	3.01606	5.12822	KOG0825	PHD Zn-finger protein	General function prediction only	POORLY CHARACTERIZED	nucl 17.5, cyto_nucl 13.5, cyto 6.5
proteinId259131	0.135316	0.904212	1.59664	0.0586939	1.46133	0.0813609	2.24817	1.05257	3.39313					mito 17, extr 5, nucl 3
proteinId259169	0.785868	0.232481	2.17557	0.000115781	1.38971	0.0128217	9.89333	2.92255	13.8922					mito 13, nucl 7, cyto 5
proteinId259247	0.130353	0.914735	6.86688	2.85935e-19	6.73652	3.11775e-26	0.78461	0.351642	47.8804					plas 11, extr 8, E.R. 3, mito 2, golg 2
proteinId259280	1.25578	0.00339933	-1.80884	2.64181e-05	-3.06462	3.27821e-13	24.8171	5.33955	1.53975	KOG3439	Protein conjugation factor involved in autophagy	Posttranslational modification, protein turnover, chaperones	CELLULAR PROCESSES AND SIGNALING	plas 11, mito 8, E.R. 3, extr 2, vacu 2
proteinId259425	1.50224	0.0603535	4.81646	4.21138e-12	3.31422	1.05486e-07	5.68379	0.981894	30.9246					plas 19, E.R. 4, mito 3
proteinId259584	1.78346	0.0233097	8.24682	7.32841e-33	6.46336	2.58909e-25	8.83914	1.27545	455.608					plas 16, mito 6, E.R. 3, cyto_mito 3, mito_nucl 3
proteinId259757	1.35134	3.97927e-05	1.56062	6.63391e-07	0.209284	0.551013	161.757	32.3672	98.2616	KOG3361	Iron binding protein involved in Fe-S cluster formation	Energy production and conversion	METABOLISM	mito 24.5, cyto_mito 13.833	NifU_N
proteinId260145	5.33742	1.69982e-11	-0.91458	0.271896	-6.252	8.61256e-16	789.439	8.63966	4.56209					plas 27	K_trans
proteinId260446	3.9735	9.01668e-05	2.26234	0.0265013	-1.71116	0.0467684	9.21178	0.260301	1.396					mito 7, plas 7, E.R. 7, extr 3, cyto 1, golg 1, vacu 1
proteinId260834	2.61562	3.73216e-05	-0.551447	0.402026	-3.16707	2.12758e-07	152.59	12.6665	8.77784					cyto 11, mito 5, cysk 5, pero 4	DUF3445
proteinId261013	-1.16624	0.347677	1.69338	0.0920432	2.85961	0.00473986	1.09854	1.32525	4.63497					nucl 17.5, cyto_nucl 12.5, mito 5, cyto 4.5
proteinId261016	-0.279155	0.815571	4.01422	1.01018e-06	4.29338	2.74603e-08	1.04835	0.651719	11.6586					extr 21, cyto 4
proteinId261099	1.85892	0.264366	6.29566	4.60294e-06	4.43674	2.39398e-05	0.636634	0.0611162	8.27045					nucl 8, cyto 7, extr 5, cyto_mito 5
proteinId261177	1.52737	1.5249e-05	-3.57536	6.35801e-20	-5.10274	1.32059e-39	55.9261	9.89674	0.822931	KOG1187	Serine/threonine protein kinase	Signal transduction mechanisms	CELLULAR PROCESSES AND SIGNALING	cyto 10, mito 6, nucl 5, cysk 4
proteinId261362	NA	NA	NA	NA	NA	NA	0	0	0					nucl 10, cyto_nucl 9.5, mito 8, cyto 7
proteinId261407	-0.2823	0.541505	0.281957	0.486743	0.564257	0.154033	8.60349	5.40348	6.70019	KOG1869	Splicing coactivator SRm160/300, subunit SRm300	RNA processing and modification	INFORMATION STORAGE AND PROCESSING	nucl 14.5, plas 11, cyto_nucl 8.5
proteinId261450	2.50118	2.53427e-15	5.72837	5.77832e-79	3.22719	1.39286e-28	86.17	7.7311	425.897					plas 19, E.R. 3, mito 2, extr 2
proteinId261592	1.06029	0.336049	1.19828	0.227491	0.137987	0.896394	2.21237	0.529024	1.29157					mito 17, cyto 6, extr 3, cyto_nucl 3, cyto_pero 3
proteinId261697	2.26801	NA	3.44792	0.113512	1.17992	0.573167	0.199457	0	0.291947					mito 17, cyto 4, nucl 2, plas 2, extr 2, cyto_pero 2
proteinId261901	0.278405	0.668738	2.47206	8.15186e-07	2.19366	1.39312e-05	23.87	10.1359	59.0925					mito 9, cyto 6, cyto_nucl 5, extr 3, pero 3, cysk 3	Tocopherol_cycl
proteinId261902	0.370186	0.50754	-2.33152	1.39187e-06	-2.7017	2.01287e-08	12.6756	5.01571	0.988867	KOG1869	Splicing coactivator SRm160/300, subunit SRm300	RNA processing and modification	INFORMATION STORAGE AND PROCESSING	nucl 24, cyto 2
proteinId262258	-1.30188	0.00228096	-7.42732	1.95432e-37	-6.12545	1.45521e-25	26.1978	32.9679	0.174716	KOG1869	Splicing coactivator SRm160/300, subunit SRm300	RNA processing and modification	INFORMATION STORAGE AND PROCESSING	nucl 14.5, mito 11, cyto_nucl 8.5	DUF3210
proteinId262450	2.47009	0.0148979	8.1131	7.96853e-20	5.64301	4.7969e-23	2.00401	0.14963	56.1759					plas 14, mito 5, E.R. 5, vacu 2
proteinId262454	-0.840632	0.0813978	-1.75723	8.61349e-05	-0.916597	0.0502893	9.20887	8.56557	2.54659	KOG1869	Splicing coactivator SRm160/300, subunit SRm300	RNA processing and modification	INFORMATION STORAGE AND PROCESSING	nucl 21.5, cyto_nucl 14, cyto 3.5
proteinId262526	3.49965	0.030375	1.2652	0.438964	-2.23445	0.133591	3.81513	0.128656	0.375996					nucl 20.5, cyto_nucl 11.5, plas 2, golg 2
proteinId262530	4.96631	2.17163e-14	11.4338	1.35981e-74	6.46752	1.87536e-40	23.5014	0.332015	1130.52	KOG1474	Transcription initiation factor TFIID, subunit BDF1 and related bromodomain proteins	Transcription	INFORMATION STORAGE AND PROCESSING	extr 24, mito 2
proteinId26263	0.736259	0.138697	0.604001	0.191899	-0.132258	0.794612	22.7551	6.88152	10.7151	KOG2771	Subunit of tRNA-specific adenosine-34 deaminase	RNA processing and modification	INFORMATION STORAGE AND PROCESSING	mito 18.5, cyto_mito 12.833, cyto 6, cyto_nucl 4.833	dCMP_cyt_deam_1
proteinId262651	4.81935	6.32469e-15	3.79386	4.83438e-10	-1.02549	0.0868677	86.0761	1.43248	21.5606	KOG1216	von Willebrand factor and related coagulation proteins	Extracellular structures	CELLULAR PROCESSES AND SIGNALING	extr 18, mito 4, cyto_nucl 2, nucl 1.5, cyto 1.5
proteinId262660	1.70554	0.368299	2.11722	0.205624	0.411685	0.8119	1.02448	0.126007	0.735064					mito 16.5, cyto_mito 10.5, extr 5, cyto 3.5
proteinId262719	1.33478	0.00164143	0.970484	0.017871	-0.364292	0.399916	15.9987	3.22188	6.46277	KOG4701	Chitinase	Cell wall/membrane/envelope biogenesis	CELLULAR PROCESSES AND SIGNALING	mito 16, nucl 7, cyto 3	DUF1765
proteinId26274	-2.94904	9.34718e-17	0.503648	0.167731	3.45269	3.92433e-23	17.1672	68.4195	99.6352	KOG0069	Glyoxylate/hydroxypyruvate reductase (D-isomer-specific 2-hydroxy acid dehydrogenase superfamily)	Energy production and conversion	METABOLISM	cyto 22, cysk 3	2-Hacid_dh_C,2-Hacid_dh
proteinId26286	0.0517333	0.915107	-0.244743	0.531432	-0.296477	0.450682	9.75414	4.80752	4.12744	KOG0619	FOG: Leucine rich repeat	General function prediction only	POORLY CHARACTERIZED	nucl 10.5, cyto_nucl 9, cyto 6.5, mito 5, extr 3	SOG2,LRR_8,LRR_4,LRR_1
proteinId262881	0.332419	0.389448	-3.57559	3.49381e-20	-3.90801	5.35146e-24	28.9495	11.784	0.988374	KOG0583	Serine/threonine protein kinase	Signal transduction mechanisms	CELLULAR PROCESSES AND SIGNALING	nucl 13, cyto_nucl 13, cyto 11	Pkinase,Pkinase_Tyr
proteinId262890	1.5687	0.320091	1.88381	0.180682	0.315103	0.828642	1.81811	0.271928	1.2062					extr 17, mito 6, cyto 3, mito_nucl 3
proteinId262975	0.00353993	0.996889	1.85209	0.00164139	1.84855	0.00195044	659.593	346.095	1304.06					extr 25
proteinId26354	-0.0487743	0.943095	1.70565	0.000581196	1.75443	0.000394221	7.75369	4.08428	13.8271	KOG4035	Coeffector of mDia Rho GTPase, regulates actin polymerization and cell adhesion turnover	Cytoskeleton	CELLULAR PROCESSES AND SIGNALING	nucl 18, cyto_nucl 13, cyto 6	DUF2013
proteinId263555	2.08997	NA	-0.00526462	0.998233	-2.09524	0.383309	0.257961	0	0					nucl 12, cyto_nucl 10, mito 9, cyto 6
proteinId263566	1.84594	0.000200662	-0.510987	0.314932	-2.35693	7.14957e-07	91.4672	12.6694	9.05455	KOG2133	Transcriptional corepressor Atrophin-1/DRPLA	General function prediction only	POORLY CHARACTERIZED	extr 27	Rifin_STEVOR
proteinId263576	0.692427	NA	-1.35669	0.582079	-2.04912	0.408503	0.249249	0.0629111	0					plas 7, cyto 6, extr 5, cyto_mito 5, mito 4
proteinId263581	-0.34961	0.682937	-0.975368	0.178912	-0.625758	0.408402	7.33977	4.81588	2.46673					nucl 22, cyto_nucl 14, cyto 4
proteinId263658	0.586856	0.74077	0.824323	0.584931	0.237467	0.879877	1.45776	0.484065	0.92753					nucl 15.5, cyto_nucl 12.5, mito 7, cyto 4.5
proteinId263698	-0.0248546	0.965979	1.00019	0.0152271	1.02505	0.013747	23.7639	12.2738	25.2748	KOG3085	Predicted hydrolase (HAD superfamily)	General function prediction only	POORLY CHARACTERIZED	cyto 10, nucl 6, mito 5, cysk 5	HAD_2,Hydrolase_like
proteinId263777	-0.0857479	0.933115	2.03654	0.00572508	2.12229	0.00426158	3.49933	1.96348	8.49974	KOG2146	Splicing coactivator SRm160/300, subunit SRm160 (contains PWI domain)	General function prediction only	POORLY CHARACTERIZED	nucl 19, cyto 5, mito 2
proteinId263782	5.98595	7.82527e-07	9.02792	5.21908e-15	3.04197	7.70527e-06	4.64433	0.0179758	20.4047					plas 21, E.R. 4
proteinId263894	-1.59448	3.859e-06	-3.28867	3.39667e-23	-1.69419	5.95445e-07	91.4232	141.301	14.5469	KOG0106	Alternative splicing factor SRp55/B52/SRp75 (RRM superfamily)	RNA processing and modification	INFORMATION STORAGE AND PROCESSING	nucl 21, cyto_nucl 14, cyto 5	RRM_1,RRM_6,RRM_5
proteinId26392	2.75872	2.31444e-07	5.02678	1.64092e-23	2.26806	8.84235e-09	2.9762	0.216267	7.59964	KOG3105	DNA-binding centromere protein B (CENP-B)	Cell cycle control, cell division, chromosome partitioning	METABOLISM	nucl 24, mito 2
proteinId264030	0.887854	0.109644	-1.69233	0.00211003	-2.58018	1.4173e-06	19.9909	5.52727	1.70137	KOG0393	Ras-related small GTPase, Rho type	General function prediction only	POORLY CHARACTERIZED	mito 15, cyto_mito 14, cyto 11	Ras,Miro,Arf
proteinId264054	-0.475824	0.433469	-3.18189	1.30473e-07	-2.70607	8.64232e-06	4.89577	3.47861	0.374306	KOG0494	Transcription factor CHX10 and related HOX domain proteins	General function prediction only	POORLY CHARACTERIZED	nucl 23, cyto_nucl 14	NST1
proteinId264362	3.45396	0.0754138	7.08367	3.68545e-05	3.62971	0.00134483	0.806859	0	5.93928					mito 15, cyto 3, plas 3, E.R. 2, cyto_pero 2
proteinId264401	5.38925	2.33062e-05	8.8803	1.44888e-13	3.49105	7.53193e-06	6.66597	0.0391494	41.5477					cyto 6.5, plas 6, cyto_nucl 6, mito 5, nucl 4.5, pero 3
proteinId264482	-0.603622	0.18005	-2.61763	9.02592e-11	-2.014	8.73557e-07	15.7173	12.239	2.01343	KOG1187	Serine/threonine protein kinase	Signal transduction mechanisms	CELLULAR PROCESSES AND SIGNALING	nucl 17.5, cyto_nucl 12.5, cyto 6.5
proteinId264649	0.904764	0.411186	-2.73856	0.00529815	-3.64332	0.000192969	13.4677	3.58137	0.481389					nucl 26.5, cyto_nucl 14	Zn_clus
proteinId264651	4.21256	5.36978e-06	6.97493	1.82525e-15	2.76238	0.000496664	16.1982	0.389529	62.7303					plas 20, mito 3, E.R. 3
proteinId264698	1.14658	0.0137065	0.97039	0.027279	-0.176192	0.717884	22.9861	5.27622	10.6395					nucl 11, pero 8, cyto 4, mito 3	Fungal_trans_2
proteinId264849	-0.237478	0.725969	-0.596189	0.292228	-0.358712	0.543979	3.96355	2.37633	1.5943					cyto 9, nucl 8, pero 4, mito 3, cysk 2
proteinId264880	-1.05497	0.141545	-1.03636	0.115927	0.0186105	0.980875	10.1667	10.7167	5.26935					plas 14, extr 8, cyto 2, E.R. 2
proteinId265127	1.56442	0.323431	6.51372	2.2372e-07	4.9493	2.71531e-09	0.376144	0.0478687	6.72652					plas 9, mito 7, extr 3, nucl 2, cyto 2, cyto_nucl 2, E.R. 2
proteinId265128	0.0648903	0.968436	1.66451	0.14787	1.59962	0.155541	0.730258	0.359082	1.25857					plas 7, cyto 6.5, cyto_nucl 4.5, mito 4, E.R. 4, extr 2, nucl 1.5
proteinId265861	0.692204	0.344446	-2.89582	7.43193e-05	-3.58803	6.83764e-07	20.4816	6.43494	0.819423					mito 15, cyto_nucl 6.5, nucl 6, cyto 5
proteinId265902	-0.381436	0.848838	0.335412	0.850192	0.716848	0.672614	0.890597	0.640561	0.853005					plas 18, mito 7
proteinId265910	1.85825	0.259074	5.27502	0.000111808	3.41677	0.000564252	0.859336	0.0813228	5.30838					nucl 10, cysk 8, cyto 6, mito 1, pero 1, golg 1
proteinId266019	-2.40438	1.01119e-05	-5.78784	1.14915e-24	-3.38346	4.43648e-09	16.7308	47.1871	0.817948	KOG0255	Synaptic vesicle transporter SVOP and related transporters (major facilitator superfamily)	General function prediction only	POORLY CHARACTERIZED	plas 25	MFS_1,Sugar_tr
proteinId266061	2.94249	0.000600119	4.2803	9.91768e-08	1.33781	0.0860024	5.81089	0.350981	7.84405	KOG3098	Uncharacterized conserved protein	Function unknown	POORLY CHARACTERIZED	plas 26	MFS_1,UNC-93
proteinId266093	2.41221	0.000335746	2.49575	9.82335e-05	0.0835356	0.909731	18.2355	1.71461	10.2938					plas 22, E.R. 3
proteinId266130	0.555101	0.763376	-3.91339	0.0434763	-4.46849	0.021425	0.855746	0.292778	0	KOG1869	Splicing coactivator SRm160/300, subunit SRm300	RNA processing and modification	INFORMATION STORAGE AND PROCESSING	mito 17, cyto 4, nucl 3, extr 2, cyto_pero 2
proteinId266164	1.01979	0.000260863	-0.271199	0.342701	-1.29099	1.3023e-06	185.306	46.626	39.4642					mito 11, nucl 9.5, cyto_nucl 7.5, cyto 4.5
proteinId266221	0.947812	NA	3.15619	0.172609	2.20838	0.347779	0.12291	0	0.587055					cysk 18, nucl 4, mito 3, cyto_nucl 3
proteinId266230	-1.29833	0.157096	3.8382	2.39705e-07	5.13653	1.20896e-11	2.27826	3.02261	47.2683					mito 9.5, plas 7, extr 7, cyto_mito 6.5, cyto 2.5
proteinId266358	-0.518308	0.148536	0.138194	0.697597	0.656502	0.0457894	10.0003	7.32118	8.22915	KOG4629	Predicted mechanosensitive ion channel	Cell wall/membrane/envelope biogenesis	CELLULAR PROCESSES AND SIGNALING	plas 21, nucl 3, cyto 1, golg 1, vacu 1	MS_channel
proteinId266407	0.805629	0.550446	-0.0278936	0.997358	-0.833523	0.49122	1.39691	0.395825	0.393323					mito 17, nucl 8
proteinId26649	0.610628	0.105871	2.05143	5.6508e-10	1.4408	1.62442e-05	64.6909	21.6264	92.5873	KOG2846	Predicted membrane protein	Function unknown	POORLY CHARACTERIZED	nucl 12.5, mito 10, cyto_nucl 8.5, cyto 3.5	DUF2296
proteinId266564	-0.814437	0.142193	2.38491	7.53566e-07	3.19935	3.29553e-11	16.0471	14.2758	77.6629	KOG2517	Ribulose kinase and related carbohydrate kinases	Carbohydrate transport and metabolism	METABOLISM	cyto 12.5, cysk 12, cyto_nucl 7.5	FGGY_C,FGGY_N
proteinId267021	1.24681	0.195288	-1.68581	0.0508715	-2.93262	0.000590268	100.455	21.7747	6.64529	KOG1187	Serine/threonine protein kinase	Signal transduction mechanisms	CELLULAR PROCESSES AND SIGNALING	mito 11, nucl 5.5, cyto_nucl 4, extr 3, pero 3, plas 2
proteinId267117	0.269176	0.727778	0.384666	0.55505	0.11549	0.868737	18.4496	7.79805	10.3639					nucl 15.5, cyto_nucl 11.5, cyto 6.5, mito 4	Mis14
proteinId267118	1.87044	0.0011934	1.67983	0.00227627	-0.190612	0.758039	13.4354	1.81293	6.05449	KOG1474	Transcription initiation factor TFIID, subunit BDF1 and related bromodomain proteins	Transcription	INFORMATION STORAGE AND PROCESSING	extr 13, mito 4, nucl 3, cyto_mito 3, cyto 2, golg 2
proteinId267261	0.249951	0.552598	1.46671	1.38675e-05	1.21676	0.000357358	40.277	17.3375	49.0571	KOG1607	Protein transporter of the TRAM (translocating chain-associating membrane) superfamily	Intracellular trafficking, secretion, and vesicular transport	CELLULAR PROCESSES AND SIGNALING	plas 20, E.R. 3, vacu 2	TRAM_LAG1_CLN8,TRAM1
proteinId267332	-0.942694	0.0539647	-7.11529	7.44137e-56	-6.17259	6.78619e-42	810.313	808.988	5.59681	KOG1744	Histone H2B	Chromatin structure and dynamics	INFORMATION STORAGE AND PROCESSING	nucl 24, cyto_nucl 14	Histone
proteinId267431	2.79929	2.52416e-07	8.13333	1.41753e-57	5.33404	6.93367e-35	6.00316	0.426115	130.452	KOG1906	DNA polymerase sigma	Replication, recombination and repair	INFORMATION STORAGE AND PROCESSING	nucl 14, mito 7, cyto 2, plas 1, pero 1, E.R. 1, golg 1
proteinId267448	0.432049	0.224378	1.54974	3.57369e-07	1.11769	0.000293787	41.086	15.5392	46.574					plas 18, mito 4, nucl 2, cyto 2, cyto_nucl 2	CorA
proteinId267491	0.635853	0.513795	6.10694	4.85071e-17	5.47109	7.2384e-19	0.988073	0.311616	24.8181					nucl 12.5, cyto_nucl 12.333, cyto 9, cyto_pero 5.499, mito 5
proteinId267559	0.708821	0.275046	2.42836	1.06732e-05	1.71954	0.00214696	18.3829	5.58824	31.5423	KOG2533	Permease of the major facilitator superfamily	Carbohydrate transport and metabolism	METABOLISM	plas 25	MFS_1,MFS_2
proteinId267946	1.47831	0.000322178	5.02802	6.85558e-41	3.54971	3.11837e-24	27.4173	5.02264	171.925					plas 15, mito 5, E.R. 4, golg 2
proteinId267950	0.380931	0.677163	-3.24463	1.03409e-05	-3.62556	9.06292e-07	18.9528	7.40576	0.734225	KOG1721	FOG: Zn-finger	General function prediction only	POORLY CHARACTERIZED	nucl 18, mito 5, cyto 3	zf-H2C2_2
proteinId268133	-0.410711	0.490096	0.460678	0.376682	0.871389	0.0888961	34.3534	23.7653	33.3099	KOG4232	Delta 6-fatty acid desaturase/delta-8 sphingolipid desaturase	Lipid transport and metabolism	METABOLISM	mito 15, cyto 7, pero 3	FA_desaturase,Cyt-b5
proteinId268212	1.09968	0.000726601	2.31084	2.19886e-14	1.21116	8.27878e-05	41.7287	9.88135	50.4815	KOG2744	DNA-binding proteins Bright/BRCAA1/RBP1 and related proteins containing BRIGHT domain	Transcription	INFORMATION STORAGE AND PROCESSING	nucl 13.5, cyto_nucl 10.5, cyto 6.5, mito 5	ARID
proteinId268759	2.67444	0.112896	3.71072	0.0143584	1.03628	0.416761	1.08012	0.0558075	1.22467					extr 9, plas 7, mito 6, E.R. 2, cyto 1, golg 1, vacu 1
proteinId268771	-0.84116	0.051909	-4.7995	2.26496e-22	-3.95834	1.9256e-15	16.794	15.3728	0.536433					plas 20, mito 4, E.R. 2, cyto_mito 2, mito_nucl 2	PAP2,PAP2_3
proteinId268792	1.94794	NA	-0.0104744	0.998233	-1.95842	0.41311	0.125655	0	0					nucl 15.5, cyto_nucl 10, mito 8
proteinId269404	1.18	NA	-0.00889727	0.998233	-1.1889	0.625726	0.0674085	0	0					nucl 11, cyto_nucl 9, cysk 7, cyto 5, mito 3
proteinId269412	0.553209	0.249489	5.16034	1.189e-41	4.60713	6.20206e-42	13.7737	4.79304	178.926					nucl 13.5, mito 10, cyto_nucl 9
proteinId269418	0.623277	0.07296	-1.00442	0.0021719	-1.6277	3.73263e-07	34.2275	11.3934	5.7837	KOG0032	Ca2+/calmodulin-dependent protein kinase, EF-Hand protein superfamily	Signal transduction mechanisms	CELLULAR PROCESSES AND SIGNALING	mito 12, nucl 5, cyto 4, plas 2, pero 2	Pkinase,Pkinase_Tyr,Kinase-like
proteinId269493	2.57928	3.50016e-22	3.89092	1.70975e-50	1.31163	7.5286e-07	238.011	20.2134	309.463	KOG1041	Translation initiation factor 2C (eIF-2C) and related proteins	Translation, ribosomal structure and biogenesis	INFORMATION STORAGE AND PROCESSING	mito 12, nucl 7.5, cyto_nucl 6.5, cyto 4.5	Piwi,PAZ,DUF1785
proteinId269609	0.977229	0.0688419	-1.54001	0.00224641	-2.51724	3.86813e-07	18.5237	4.74823	1.65396	KOG4091	Transcription factor	Transcription	INFORMATION STORAGE AND PROCESSING	nucl 11, cyto 8, mito_nucl 8	CP2
proteinId269670	0.376639	0.481622	-1.23711	0.00973969	-1.61375	0.000578474	11.306	4.44872	1.91447					nucl 24.5, cyto_nucl 14	Whi5
proteinId27005	-1.36307	0.000639418	0.13834	0.745948	1.50141	8.15761e-05	17.0748	22.5082	25.2996	KOG3082	Methionyl-tRNA formyltransferase	Translation, ribosomal structure and biogenesis	INFORMATION STORAGE AND PROCESSING	mito 27	Formyl_trans_N,Formyl_trans_C
proteinId270093	-0.636618	0.161494	-2.33132	5.73493e-09	-1.6947	3.23036e-05	115.311	91.3327	18.2472	KOG0439	VAMP-associated protein involved in inositol metabolism	Intracellular trafficking, secretion, and vesicular transport	CELLULAR PROCESSES AND SIGNALING	cyto_nucl 10.5, nucl 10, cyto 9, cysk 6	Motile_Sperm
proteinId270285	-0.550075	0.845968	2.86521	0.186406	3.41529	0.116727	0.0824885	0.0819168	1.29685					mito 17, nucl 4, cyto 4, cyto_nucl 4
proteinId270354	-1.04624	0.45217	-2.43102	0.0689444	-1.38478	0.330917	1.06465	1.17387	0.184588					mito 10, extr 8, nucl 5.5, cyto_nucl 5, cyto 3.5
proteinId270603	1.31677	0.112711	7.15414	3.40675e-26	5.83737	9.97586e-36	1.02346	0.201405	31.8347					nucl 19, cyto_nucl 13, cyto 5
proteinId270637	1.18072	0.273621	3.46121	0.000122566	2.2805	0.00441632	2.01587	0.432798	5.43936	KOG0391	SNF2 family DNA-dependent ATPase	General function prediction only	POORLY CHARACTERIZED	mito 12.5, cyto_mito 9.5, cyto 5.5, extr 5, nucl 2
proteinId270662	7.56289	2.66636e-07	10.0215	1.06793e-12	2.45859	0.000781009	7.74312	0	22.5753	KOG1812	Predicted E3 ubiquitin ligase	Posttranslational modification, protein turnover, chaperones	CELLULAR PROCESSES AND SIGNALING	nucl 13.5, cyto_nucl 11, cyto 7.5, pero 4	IBR
proteinId270674	2.91994	0.0372039	6.68025	6.60833e-08	3.76031	3.79636e-07	0.32711	0.0137112	2.49831	KOG0161	Myosin class II heavy chain	Cytoskeleton	CELLULAR PROCESSES AND SIGNALING	nucl 21, cyto 3, mito 2
proteinId270940	2.55433	0.187003	0.363988	0.863363	-2.19034	0.219809	1.24233	0.0775429	0.107082					nucl 18.5, cyto_nucl 12.5, cyto 5.5
proteinId270950	-0.620048	0.486868	-3.27196	0.000411596	-2.65191	0.00494649	2.85703	2.27041	0.214866					nucl 6, plas 6, mito 5, cyto 5, cyto_mito 5
proteinId271291	-0.0784233	0.934538	2.38671	0.000330326	2.46514	0.000122712	2.73464	1.46783	8.14198					plas 8, mito 4, extr 4, vacu 4, cyto 3, pero 2, E.R. 2, mito_nucl 2
proteinId271702	0.547009	0.504614	-3.43279	2.3054e-06	-3.9798	4.29213e-08	9.73629	3.40341	0.303186	KOG1721	FOG: Zn-finger	General function prediction only	POORLY CHARACTERIZED	nucl 23.5, cyto_nucl 13
proteinId271929	0.996649	0.0146184	1.38788	0.0002416	0.39123	0.329922	9.86776	2.52837	6.78292	KOG3149	Transcription initiation factor IIF, auxiliary subunit	Transcription	INFORMATION STORAGE AND PROCESSING	nucl 14, mito 10, cyto 2	Fungal_trans
proteinId27199	-0.697288	0.576463	-1.0269	0.351561	-0.329607	0.78376	2.33401	2.03728	0.985898					mito 8.5, extr 7, cyto_mito 6.5, nucl 5, cyto 3.5
proteinId271996	-0.0186576	0.986149	-2.57222	0.00121455	-2.55357	0.00140292	4.43553	2.29805	0.364567	KOG2510	SWI-SNF chromatin-remodeling complex protein	Chromatin structure and dynamics	INFORMATION STORAGE AND PROCESSING	nucl 23.5, cyto_nucl 14
proteinId272026	2.093	0.234	1.0709	0.525372	-1.02209	0.532862	2.64489	0.250524	0.60401	KOG1482	Zn2+ transporter	Inorganic ion transport and metabolism	METABOLISM	mito 15, cyto_nucl 6, nucl 5, cyto 5
proteinId272033	-0.0464867	0.935171	-0.058653	0.912717	-0.0121663	0.980875	5.45865	2.90099	2.8418	KOG0661	MAPK related serine/threonine protein kinase	Signal transduction mechanisms	CELLULAR PROCESSES AND SIGNALING	mito 13, nucl 7, cyto 6	Pkinase,Pkinase_Tyr
proteinId272035	1.33734	0.181255	6.77651	3.92773e-17	5.43916	1.29914e-22	1.69875	0.307122	40.6569					nucl 15.5, mito 10, cyto_nucl 10
proteinId272792	0.292872	0.664403	-0.728285	0.199275	-1.02116	0.0687894	28.0571	11.6718	7.18322					nucl 11, mito 11, mito_nucl 11
proteinId272868	0.361518	0.797522	-3.52472	0.0160854	-3.88624	0.00793599	2.03314	0.813246	0.0465834					nucl 15.5, cyto_nucl 11, mito 6, cyto 5.5
proteinId273054	-0.434066	0.352596	-0.766053	0.0615162	-0.331988	0.450404	22.7564	15.7076	9.40638	KOG4473	Uncharacterized membrane protein	Function unknown	POORLY CHARACTERIZED	mito 11, plas 6, mito_nucl 6, extr 5	VIT1
proteinId273082	-0.525976	NA	0.997594	0.68226	1.52357	0.530663	0.208918	0.20747	0.615848					mito 10, cyto 7.5, extr 6, cyto_nucl 6, nucl 3.5
proteinId273212	1.17153	0.0643449	-1.37033	0.0319829	-2.54186	3.27654e-05	8.76994	1.9488	0.75037					mito 17, nucl 8, cyto_nucl 6
proteinId273213	1.47927	0.000442059	3.3779	5.85946e-18	1.89864	1.24052e-06	21.3491	3.85542	41.5567	KOG4157	beta-1,6-N-acetylglucosaminyltransferase, contains WSC domain	Carbohydrate transport and metabolism	METABOLISM	nucl 15.5, cyto_nucl 10.333, mito 7.5, cyto_mito 6.333
proteinId273250	-0.00801435	0.99152	0.0643323	0.920264	0.0723467	0.901762	11.2851	5.8375	6.2038					cyto 8, mito 7, cyto_nucl 7, nucl 6
proteinId273270	4.62624	0.00770918	7.99675	4.73833e-07	3.37052	0.000123239	1.32674	0	7.95733	KOG1187	Serine/threonine protein kinase	Signal transduction mechanisms	CELLULAR PROCESSES AND SIGNALING	cyto_nucl 16, nucl 12.5, cyto 12.5
proteinId273357	-2.21528	1.6046e-09	-2.14764	2.28491e-09	0.0676407	0.876474	23.9864	57.4673	13.1716	KOG1448	Ribose-phosphate pyrophosphokinase	Nucleotide transport and metabolism	METABOLISM	cyto 17, cyto_nucl 11, mito 5, nucl 3	Pribosyltran_N,Pribosyl_synth,Pribosyltran
proteinId273484	1.22638	0.00209127	1.43357	0.00013907	0.20719	0.61841	23.6606	5.11512	14.2422	KOG3880	Predicted small molecule transporter involved in cellular pH homeostasis (Batten disease protein in human)	General function prediction only	POORLY CHARACTERIZED	plas 21, mito 3, E.R. 2	CLN3,MFS_1
proteinId273533	-0.161078	0.875196	-2.97136	0.000161082	-2.81028	0.000420006	4.19862	2.40845	0.296772	KOG1998	Signaling protein DOCK180	Signal transduction mechanisms	CELLULAR PROCESSES AND SIGNALING	cyto_nucl 11, nucl 10.5, cyto 10.5, mito 5	DOCK-C2,Ded_cyto
proteinId273558	0.940158	0.048219	5.33941	6.51247e-38	4.39926	6.92933e-28	11.3682	3.05129	130.282	KOG3544	Collagens (type IV and type XIII), and related proteins	Extracellular structures	CELLULAR PROCESSES AND SIGNALING	mito 12, extr 5, cyto 4, nucl 2, pero 2
proteinId273560	-0.624343	0.38778	-1.15357	0.0786912	-0.529228	0.449914	2.35339	1.88362	0.852532					mito 19, nucl 3.5, cyto_nucl 3.5, cyto 2.5
proteinId273596	-1.25714	NA	0.468123	0.860604	1.72526	0.485859	0	0.104494	0.192399					nucl 10.5, cyto_nucl 10, mito 7, cyto 6.5
proteinId273608	-1.06606	0.0104456	-0.601121	0.134366	0.464936	0.267467	20.0034	21.6024	14.5543					cyto_nucl 7, nucl 6, mito 6, cyto 6, plas 5, pero 3
proteinId273700	1.38834	0.0740983	2.53681	0.000268398	1.14848	0.0929611	6.33086	1.22295	7.52911					extr 14, plas 7, E.R. 3, mito 2
proteinId273812	3.66808	5.61244e-22	5.90437	3.17917e-57	2.23628	1.11399e-12	35.5557	1.39561	88.1433	KOG2992	Nucleolar GTPase/ATPase p130	Nuclear structure	CELLULAR PROCESSES AND SIGNALING	extr 25
proteinId273850	0.537907	0.75125	-4.72485	0.00958252	-5.26276	0.00408891	2.38486	0.848674	0					nucl 14, mito 6, cyto 5
proteinId273854	-0.528669	NA	-3.39866	0.113189	-2.87	0.194533	0.483538	0.391451	0					nucl 12.5, cyto_nucl 12, cyto 8.5, mito 6
proteinId274069	0.270279	0.692334	-0.919337	0.0973368	-1.18962	0.0319674	30.7344	13.1228	7.07333	KOG1216	von Willebrand factor and related coagulation proteins	Extracellular structures	CELLULAR PROCESSES AND SIGNALING	mito 15.5, cyto_mito 11.5, cyto 6.5, nucl 5
proteinId274085	0.554082	0.110677	-1.77957	4.18035e-08	-2.33365	3.5494e-13	26.864	9.34316	2.76525	KOG1009	Chromatin assembly complex 1 subunit B/CAC2 (contains WD40 repeats)	Chromatin structure and dynamics	INFORMATION STORAGE AND PROCESSING	cyto 13, nucl 11, mito 2	WD40
proteinId27590	6.56641	7.15958e-09	10.4994	4.92857e-22	3.93304	1.57686e-12	24.4577	0.0613443	199.394					plas 14, mito 7, E.R. 5
proteinId27634	-0.974789	0.000572954	1.99234	2.44847e-14	2.96713	6.79109e-30	45.1054	45.5907	185.866	KOG3103	Rab GTPase interacting factor, Golgi membrane protein	Intracellular trafficking, secretion, and vesicular transport	CELLULAR PROCESSES AND SIGNALING	plas 25	Yip1
proteinId2767	0.152334	0.836715	-1.03525	0.0732276	-1.18758	0.0414063	23.6674	10.9107	5.3269					cyto 8.5, mito 7, cyto_nucl 6.5, nucl 3.5, plas 3, pero 3
proteinId27730	-0.351156	0.615317	-5.53706	3.10723e-08	-5.1859	2.72078e-07	10.7275	7.01113	0.110327	KOG4780	Uncharacterized conserved protein	Function unknown	POORLY CHARACTERIZED	nucl 17, cyto_nucl 11, mito 7	RPAP2_Rtr1
proteinId2790	-0.467237	0.54097	-4.96675	1.31174e-07	-4.49951	2.16121e-06	9.31682	6.63393	0.176454					nucl 22.5, cyto_nucl 13.5, cyto 3.5
proteinId28293	-1.53321	0.000114807	-0.994612	0.0098461	0.538593	0.187003	13.5552	20.3118	10.4071	KOG1178	Non-ribosomal peptide synthetase/alpha-aminoadipate reductase and related enzymes	Secondary metabolites biosynthesis, transport and catabolism	METABOLISM	cyto 14.5, cyto_nucl 9.5, mito 5, nucl 3.5, plas 1, pero 1, cysk 1, vacu 1	AMP-binding,NAD_binding_4,PP-binding,Epimerase,AMP-binding_C,3Beta_HSD
proteinId286254	0.737257	0.780613	6.55285	0.000485464	5.81559	0.00012363	0.0920409	0	4.46379	KOG0504	FOG: Ankyrin repeat	General function prediction only	POORLY CHARACTERIZED	nucl 11.5, cyto_nucl 11, cyto 7.5, mito 5	Ank_2,Ank_4,Ank,Ank_3,Ank_5
proteinId286279	-0.986558	0.00360352	-0.137971	0.698691	0.848588	0.00938826	38.5835	39.4484	36.6209	KOG4061	DMQ mono-oxygenase/Ubiquinone biosynthesis protein COQ7/CLK-1/CAT5	General function prediction only	POORLY CHARACTERIZED	mito 19, nucl 4, cyto 3	COQ7
proteinId286419	-2.66464	NA	-2.47652	0.28884	0.188116	0.944063	0	0.628905	0	KOG0719	Molecular chaperone (DnaJ superfamily)	Posttranslational modification, protein turnover, chaperones	CELLULAR PROCESSES AND SIGNALING	nucl 18.5, mito_nucl 11.5, cyto 4, mito 3.5	DnaJ
proteinId286629	-1.92627	3.17733e-09	-5.94583	4.54386e-57	-4.01956	2.51672e-26	275.378	543.202	8.72732	KOG4604	Uncharacterized conserved protein	Function unknown	POORLY CHARACTERIZED	extr 8, mito 6, E.R. 6, cyto 4, pero 2	DUF543
proteinId286677	0.179405	0.905794	-3.35475	0.0255292	-3.53415	0.0190718	7.79904	3.55454	0.231644					nucl 18, mito 8
proteinId286802	3.24251	NA	3.32787	0.119331	0.0853566	0.969571	0.440745	0	0.260245	KOG3880	Predicted small molecule transporter involved in cellular pH homeostasis (Batten disease protein in human)	General function prediction only	POORLY CHARACTERIZED	plas 18, mito 4, vacu 3	CLN3
proteinId286887	-1.39314	0.00473478	-3.37479	7.63736e-11	-1.98165	0.000211094	16.468	22.561	2.15095	KOG4071	Uncharacterized conserved protein	Function unknown	POORLY CHARACTERIZED	mito 10, cyto 6, cysk 6, nucl 5	Sld5
proteinId286906	-2.93644	1.30156e-06	-8.13523	8.0067e-08	-5.19879	0.000882951	7.81417	31.6861	0					mito 15, nucl 9, cyto_mito 9	Cmc1
proteinId287004	6.85469	4.31575e-25	6.538	1.27965e-23	-0.316693	0.665689	1376.54	5.41009	573.869					extr 20, cyto 3.5, mito 3
proteinId287067	1.38019	0.00070866	0.626675	0.117358	-0.753518	0.0622253	2396.86	468.188	737.42	KOG0118	FOG: RRM domain	General function prediction only	POORLY CHARACTERIZED	cyto 11.5, cyto_nucl 9.833, cyto_pero 7.666, nucl 6, cysk 5, pero 2.5	RRM_1,RRM_6,RRM_5
proteinId287170	-1.47497	0.101604	-6.55207	5.46444e-05	-5.0771	0.00228152	1.82998	2.67287	0	KOG0591	NIMA (never in mitosis)-related G2-specific serine/threonine protein kinase	Cell cycle control, cell division, chromosome partitioning	METABOLISM	mito 16, nucl 8, cyto 1, pero 1, vacu 1, cyto_pero 1	Pkinase,Pkinase_Tyr
proteinId287280	-2.29697	2.30494e-14	-2.5761	7.04656e-18	-0.279131	0.410703	48.1512	121.858	20.7451					mito 27
proteinId287808	0.96166	NA	-1.33601	0.588477	-2.29767	0.349781	0.959373	0.180341	0	KOG1840	Kinesin light chain	Cytoskeleton	CELLULAR PROCESSES AND SIGNALING	cysk 12, nucl 8.5, cyto_nucl 6, mito 3, cyto 2.5	TPR_10,TPR_12
proteinId287839	2.39947	NA	-0.0051025	0.998233	-2.40457	0.319134	0.890827	0	0					nucl 14.5, mito_nucl 11, mito 6.5, cyto 4
proteinId287935	-0.128539	0.760301	-0.773681	0.0196585	-0.645142	0.0571905	55.6369	31.2798	18.6711	KOG0334	RNA helicase	RNA processing and modification	INFORMATION STORAGE AND PROCESSING	nucl 21, mito 3, cyto 3, cyto_mito 3
proteinId288013	-1.12316	0.0832069	-0.77293	0.209147	0.350227	0.599704	5.50876	6.31512	3.72543	KOG1994	Predicted RNA binding protein, contains G-patch and Zn-finger domains	RNA processing and modification	INFORMATION STORAGE AND PROCESSING	nucl 10, cyto 10, cyto_nucl 10	DUF4187
proteinId288029	-0.714737	0.0551683	-0.875156	0.0115044	-0.160418	0.680433	49.5921	41.8127	23.14	KOG4325	Uncharacterized conserved protein	Function unknown	POORLY CHARACTERIZED	nucl 21, mito 4	Mago-bind
proteinId288062	1.35276	0.0126578	-1.47797	0.00378734	-2.83073	1.8771e-08	203.186	39.5469	14.256	KOG3752	Ribonuclease H	Replication, recombination and repair	INFORMATION STORAGE AND PROCESSING	nucl 12, cyto_nucl 11.5, cyto 9, mito 4	Cauli_VI,RNase_H
proteinId288307	1.67055	NA	-0.00889727	0.998233	-1.67945	0.485228	0.182032	0	0					mito 10, cyto 8.5, cyto_nucl 7.5, nucl 5.5
proteinId288350	5.27467	0.0216814	2.86309	0.195499	-2.41159	0.282412	9.65532	0	0.557775					nucl 10, pero 7, cyto 6, mito 3	Tyrosinase
proteinId28879	0.695558	0.135457	3.04933	1.42845e-14	2.35378	3.69008e-10	21.0512	6.59172	56.6518					mito 9, plas 8, E.R. 4, vacu 4
proteinId28886	-0.812243	0.0225258	-4.1343	1.35206e-29	-3.32205	2.40167e-19	32.9735	29.7339	1.686	KOG4205	RNA-binding protein musashi/mRNA cleavage and polyadenylation factor I complex, subunit HRP1	RNA processing and modification	INFORMATION STORAGE AND PROCESSING	nucl 20, cyto_nucl 12.5, mito 3, cyto 3	RRM_1,RRM_6,RRM_5
proteinId288888	-0.0325467	0.963678	0.36952	0.500341	0.402067	0.470839	42.7903	22.7943	30.2383	KOG2910	Uncharacterized conserved protein predicted to be involved in protein sorting	General function prediction only	POORLY CHARACTERIZED	nucl 15, mito_nucl 12.333, cyto_nucl 9.333, mito 8.5	Snf7
proteinId288982	2.64808	0.0134122	5.0645	1.65763e-07	2.41641	0.00181823	3.29449	0.232046	9.68546	KOG2358	NifU-like domain-containing proteins	Posttranslational modification, protein turnover, chaperones	CELLULAR PROCESSES AND SIGNALING	mito 19.5, cyto_mito 13.166, cyto 5.5, cyto_nucl 4.833	Nfu_N,NifU
proteinId28908	-0.297882	0.467418	2.5934	1.34976e-15	2.89128	2.55726e-19	15.5853	9.85067	61.3737					nucl 11.5, cyto_nucl 8.5, pero 8, cyto 4.5
proteinId289089	-0.620094	0.257096	-1.44952	0.00267053	-0.829424	0.100579	50.5963	40.0697	14.9031	KOG2401	Predicted MutS-related protein involved in mismatch repair	Replication, recombination and repair	INFORMATION STORAGE AND PROCESSING	nucl 16.5, cyto_nucl 12, mito 5, cyto 4.5	Smr,DUF1771
proteinId289100	-1.74271	6.37533e-06	-10.3657	1.70748e-105	-8.62302	7.03856e-73	664.132	1158.91	0.805453					cyto 10.5, nucl 9, cyto_pero 6.5, mito 5	DUF1996
proteinId289127	-0.127075	0.788045	-3.10112	5.31651e-15	-2.97404	7.35425e-14	39.6287	22.0438	2.58031	KOG2510	SWI-SNF chromatin-remodeling complex protein	Chromatin structure and dynamics	INFORMATION STORAGE AND PROCESSING	nucl 12.5, cyto_nucl 12, cyto 6.5, mito 5	Velvet
proteinId289222	-2.67873	9.36405e-22	-2.15125	7.52837e-15	0.527476	0.0772721	79.713	263.565	60.2268					mito 17.5, cyto_mito 11, cyto 3.5, pero 3	MRP-S25
proteinId289266	-0.662543	0.0556515	-2.44687	7.21468e-15	-1.78432	2.22617e-08	361.223	295.438	54.7737	KOG3484	Cyclin-dependent protein kinase CDC28, regulatory subunit CKS1, and related proteins	Cell cycle control, cell division, chromosome partitioning	METABOLISM	nucl 13, mito 6, cyto 5, pero 1, golg 1, vacu 1	CKS
proteinId28939	0.0494134	0.926737	1.32211	0.000628003	1.27269	0.00096311	10.5381	5.23886	13.4402					nucl 21, cyto 5	RNase_H2-Ydr279
proteinId289413	-0.0819684	0.880284	-4.7225	1.14266e-15	-4.64053	4.07273e-15	11.0344	5.9852	0.21391	KOG0271	Notchless-like WD40 repeat-containing protein	Function unknown	POORLY CHARACTERIZED	nucl 16.5, cyto_nucl 11, mito 6, cyto 4.5	WD40,NACHT,AAA_16
proteinId289930	-0.161902	NA	2.3094	0.319547	2.4713	0.305633	0	0	0.43702					cyto 11, cyto_nucl 10, cysk 8, nucl 7
proteinId289988	2.54326	NA	-0.00656709	0.998233	-2.54982	0.293269	0.263266	0	0					nucl 10.5, cyto_nucl 9.5, cyto 7.5, mito 3, pero 3	DUF4238
proteinId290022	0.568221	0.275965	-4.42667	2.28984e-18	-4.99489	6.08887e-23	43.8527	15.003	0.687677					mito 17, nucl 5, cyto 3	Fungal_trans,Zn_clus
proteinId290181	-1.11124	0.0481662	-5.16911	3.03888e-20	-4.05787	8.70167e-13	51.2168	58.1187	1.54364					mito 9, nucl 8.5, cyto_nucl 8, cyto 6.5	Pyridox_ox_2
proteinId290315	0.252545	0.691097	-1.45374	0.00546649	-1.70628	0.00104023	42.1746	18.0901	6.67819	KOG1674	Cyclin	General function prediction only	POORLY CHARACTERIZED	mito 21, cyto 4	Cyclin
proteinId290354	NA	NA	NA	NA	NA	NA	0	0	0					mito 10, cyto 9.5, cyto_nucl 7.5, extr 4, nucl 2.5
proteinId290370	0.0134235	0.988864	-3.1854	0.000149051	-3.19882	0.00013721	12.1466	6.16221	0.621921	KOG3335	Predicted coiled-coil protein	General function prediction only	POORLY CHARACTERIZED	mito 15, nucl 5.5, cyto_nucl 5, cyto 3.5	OPA3
proteinId290615	0.708364	NA	3.58447	0.120454	2.87611	0.2223	0.26349	0	2.77065					mito 12, extr 8, nucl 3.5, cyto_nucl 3, cyto 1.5
proteinId290700	0.400863	0.715924	-4.38141	0.000922527	-4.78228	0.000299009	9.91536	3.82969	0.110481	KOG0423	Ubiquitin-protein ligase	Posttranslational modification, protein turnover, chaperones	CELLULAR PROCESSES AND SIGNALING	mito 19, cyto 5, nucl 2	UQ_con
proteinId291231	2.36643	0.00211225	-0.900103	0.296617	-3.26653	2.41978e-05	14.646	1.39036	0.749008	KOG2146	Splicing coactivator SRm160/300, subunit SRm160 (contains PWI domain)	General function prediction only	POORLY CHARACTERIZED	mito 13, nucl 12	SWIRM
proteinId291443	-0.278878	0.714611	-0.746039	0.248914	-0.467162	0.486766	6.06406	3.79209	2.29181	KOG2966	Uncharacterized conserved protein	General function prediction only	POORLY CHARACTERIZED	mito 10, cyto 7, extr 5, pero 2, cysk 2	DUF607
proteinId291532	1.75055	0.0203377	-2.49104	0.000740863	-4.24159	5.35904e-09	52.4623	7.57648	1.3166	KOG4306	Glycosylphosphatidylinositol-specific phospholipase C	Signal transduction mechanisms	CELLULAR PROCESSES AND SIGNALING	cyto 14, cysk 9, cyto_nucl 8.5	PI-PLC-X
proteinId291534	-0.940953	0.0137315	-4.33492	6.61161e-36	-3.39397	2.95996e-22	1688.35	1686.6	83.7542	KOG3271	Translation initiation factor 5A (eIF-5A)	Translation, ribosomal structure and biogenesis	INFORMATION STORAGE AND PROCESSING	mito 13, cyto_nucl 9, nucl 7, cyto 7	eIF-5a
proteinId291574	NA	NA	NA	NA	NA	NA	0	0	0	KOG0271	Notchless-like WD40 repeat-containing protein	Function unknown	POORLY CHARACTERIZED	cyto_mito 7.166, extr 7, mito 6.5, cyto 6.5, cyto_nucl 6.333, nucl 4	WD40
proteinId291710	0.455358	0.71057	-2.7758	0.00431754	-3.23116	0.000960385	34.9795	12.8702	1.70509	KOG1477	SPRY domain-containing proteins	General function prediction only	POORLY CHARACTERIZED	extr 10, E.R. 7, mito 4, cyto 3, plas 1, pero 1, vacu 1	SPRY
proteinId292004	-0.408591	0.497181	-3.25486	2.41871e-08	-2.84627	1.27578e-06	17.0556	11.7107	1.20235	KOG4533	Uncharacterized conserved protein	Function unknown	POORLY CHARACTERIZED	mito 12.5, cyto_mito 12.333, cyto 11, cyto_nucl 7.333	DUF218
proteinId292023	-0.97529	NA	-1.69357	0.47689	-0.718278	0.779263	0.0750724	0.145079	0					mito 15, cyto 7, cyto_nucl 7, nucl 5
proteinId292085	-0.0488632	0.93935	-1.42168	0.00403131	-1.37282	0.00585905	24.4481	13.0006	4.92086	KOG3149	Transcription initiation factor IIF, auxiliary subunit	Transcription	INFORMATION STORAGE AND PROCESSING	mito 11, nucl 10, cyto 6	YEATS
proteinId292130	-1.84283	0.0468726	-6.85058	2.33184e-05	-5.00775	0.0026239	7.08976	13.5215	0					mito 20.5, cyto_mito 12.5, cyto 3.5
proteinId292230	-1.61281	0.0214729	1.1667	0.0757533	2.77951	1.59802e-05	7.10213	11.5872	27.1904	KOG0255	Synaptic vesicle transporter SVOP and related transporters (major facilitator superfamily)	General function prediction only	POORLY CHARACTERIZED	plas 19, E.R. 4, mito 3	MFS_1,TRI12
proteinId292446	-2.16426	8.10611e-05	-2.76581	2.06962e-07	-0.601548	0.308214	21.8697	51.0493	7.51598	KOG4771	Nucleolar protein (NOP16) involved in 60S ribosomal subunit biogenesis	Translation, ribosomal structure and biogenesis	INFORMATION STORAGE AND PROCESSING	nucl 21.5, cyto_nucl 12.5, cyto 2.5	Nop16
proteinId292455	-2.372	6.74678e-09	-8.94638	4.0515e-17	-6.57438	1.17084e-09	43.7672	117.096	0.124031					mito 14, nucl 12, cyto_nucl 7.5	YqeY
proteinId292518	0.338036	0.813368	-1.39778	0.268978	-1.73582	0.163287	4.47034	1.80054	0.629428					nucl 18.5, cyto_nucl 10.5, mito 7	HTH_29,HTH_23,HTH_28
proteinId292580	-1.71125	0.000498155	-8.72051	8.76149e-10	-7.00926	1.21938e-06	22.0691	37.7228	0	KOG4526	Predicted membrane protein	Function unknown	POORLY CHARACTERIZED	mito 14, cyto 7, mito_nucl 7	DUF1279
proteinId292586	1.64522	0.124428	-2.99264	0.00294109	-4.63785	3.27244e-06	72.6304	11.5304	1.27728	KOG3386	Copper transporter	Inorganic ion transport and metabolism	METABOLISM	plas 23, mito 2	Ctr
proteinId292702	0.593988	0.536529	-3.28398	0.00194788	-3.87797	0.000216733	15.0094	5.02581	0.434676	KOG0271	Notchless-like WD40 repeat-containing protein	Function unknown	POORLY CHARACTERIZED	cyto_nucl 8.5, nucl 8, cyto 7, extr 7, mito 5	WD40,PD40
proteinId292804	0.267768	0.575769	-7.3839	5.11737e-12	-7.65167	1.13479e-12	25.1945	10.7258	0.0368937	KOG1343	Histone deacetylase complex, catalytic component HDA1	Chromatin structure and dynamics	INFORMATION STORAGE AND PROCESSING	cyto 12, cyto_nucl 9.833, cyto_mito 8.999, extr 5, nucl 4.5, mito 4.5	Hist_deacetyl
proteinId292827	0.186474	0.843172	-2.36427	0.00530889	-2.55075	0.00245809	13.2067	5.954	1.10212					cysk 15, cyto 5.5, mito 4, cyto_nucl 4	Pkinase
proteinId292905	-0.582875	0.589726	-0.833059	0.382003	-0.250184	0.810696	5.35763	4.19327	2.37098					mito 21, cyto 2.5, extr 2, cyto_nucl 2
proteinId292938	0.815122	0.0556504	2.82435	3.1848e-14	2.00923	1.09159e-08	26.2511	7.61997	55.7729					mito 16, cyto_mito 13.5, cyto 9
proteinId293034	1.09875	NA	-0.00889727	0.998233	-1.10765	0.649516	0.181594	0	0					cysk 14, cyto 6, mito 4, cyto_nucl 4	RVT_1
proteinId293037	-2.14041	1.30217e-10	-1.18271	0.000318888	0.9577	0.0046787	192.992	442.392	197.984					mito 15, cyto 7, cyto_nucl 5, extr 3	Coiled-coil_56
proteinId293038	6.03561	0.000457287	5.88797	0.00033274	-0.147644	0.890821	7.82099	0	3.63287					mito 15, nucl 6, cyto 3, plas 1, extr 1, pero 1	DUF1768
proteinId293056	0.89681	NA	1.29112	0.58823	0.394313	0.881139	0.0777324	0	0.07638					mito 16, cyto 7.5, cyto_nucl 5.5, nucl 2.5
proteinId293196	-0.0764901	0.906703	-2.15451	7.84043e-05	-2.07802	0.000137106	13.65	7.39102	1.6617	KOG1921	Endonuclease III	Replication, recombination and repair	INFORMATION STORAGE AND PROCESSING	cyto_pero 8.333, cyto 8, pero 7.5, cyto_nucl 7.333, nucl 5.5, mito 5	HhH-GPD,HHH
proteinId293225	0.241979	0.740361	0.474557	0.439073	0.232577	0.711583	5.32187	2.30531	3.29078	KOG1208	Dehydrogenases with different specificities (related to short-chain alcohol dehydrogenases)	Secondary metabolites biosynthesis, transport and catabolism	METABOLISM	mito 12, extr 6, cyto 5.5, cyto_nucl 4, E.R. 2	adh_short,KR
proteinId293282	-0.00336802	0.995392	0.0659966	0.887462	0.0693647	0.876474	22.4801	11.4708	12.2529	KOG4129	Exopolyphosphatases and related proteins	Energy production and conversion	METABOLISM	cyto 14, mito 8, nucl 3	DHHA2,DHH
proteinId293304	-0.143617	0.717789	-2.14267	1.70604e-11	-1.99906	3.97719e-10	48.8791	27.6483	6.33481	KOG3946	Glutaminyl cyclase	Posttranslational modification, protein turnover, chaperones	CELLULAR PROCESSES AND SIGNALING	extr 17, nucl 3, mito 2, cyto_nucl 2, vacu 2	Peptidase_M28
proteinId293448	-2.32799	4.66007e-06	-1.59569	0.00131546	0.732301	0.177953	5.02696	13.2176	4.42432					plas 22, E.R. 3
proteinId293560	-0.988097	0.00500877	-0.0258874	0.958115	0.96221	0.00419359	150.702	154.666	155.098	KOG4781	Uncharacterized conserved protein	Function unknown	POORLY CHARACTERIZED	cyto 8.5, cyto_nucl 8, cysk 7, nucl 6.5, mito 5	4HBT
proteinId293612	2.40035	2.25432e-08	0.377911	0.408073	-2.02244	1.39336e-06	106.843	10.221	13.6399	KOG1399	Flavin-containing monooxygenase	Secondary metabolites biosynthesis, transport and catabolism	METABOLISM	extr 8, E.R. 6, cyto 4.5, cyto_nucl 4, nucl 2.5, pero 2, golg 2	K_oxygenase,Pyr_redox_3,NAD_binding_9,Pyr_redox_2
proteinId293635	-5.25103	5.83539e-41	-6.22281	7.25567e-57	-0.971778	0.0205027	114.471	2321.91	30.7834	KOG0710	Molecular chaperone (small heat-shock protein Hsp26/Hsp42)	Posttranslational modification, protein turnover, chaperones	CELLULAR PROCESSES AND SIGNALING	nucl 19, cyto_nucl 13, cyto 5	HSP20
proteinId293641	1.44222	0.219674	-1.3825	0.246757	-2.82472	0.0123079	5.89379	1.03634	0.37087					cyto 20.5, cyto_nucl 11.5, extr 3	PIR
proteinId293662	-0.364224	0.251708	0.112554	0.715246	0.476778	0.0974369	135.692	89.5674	99.071	KOG2202	U2 snRNP splicing factor, small subunit, and related proteins	RNA processing and modification	INFORMATION STORAGE AND PROCESSING	nucl 14.5, cyto_nucl 13.5, cyto 9.5	zf-CCCH
proteinId293663	NA	NA	NA	NA	NA	NA	0	0	0	KOG2586	Pyridoxamine-phosphate oxidase	Coenzyme transport and metabolism	METABOLISM	nucl 10.5, cyto_nucl 9, cyto 6.5, mito 4, pero 3	Pyridox_oxidase
proteinId293691	-0.0944282	0.886299	-1.11823	0.0308292	-1.0238	0.0512808	30.8351	16.843	7.82285					cyto 14, mito 10, cysk 2	DUF2034,Mrr_cat
proteinId293761	-0.247033	0.764503	-5.50113	6.02277e-11	-5.2541	5.57457e-10	11.3771	6.83274	0.132554	KOG4505	Na+/H+ antiporter	Inorganic ion transport and metabolism	METABOLISM	plas 22, E.R. 4	Na_H_Exchanger,Nha1_C
proteinId293816	-0.926549	0.0274023	-4.10283	9.80731e-19	-3.17628	1.40354e-11	31.2057	30.7084	1.76422					cysk 14, cyto 8, nucl 2, mito 2, mito_nucl 2	Hydrolase,HAD_2,Hydrolase_like
proteinId293862	0.401106	NA	-1.34008	0.585711	-1.74119	0.485636	0.274019	0.0927326	0					nucl 13.5, cyto_nucl 12, cyto 7.5, mito 5	RNase_H
proteinId293924	-0.255253	0.662933	0.868745	0.0636323	1.124	0.0151922	18.6941	11.5419	21.6882					mito 12, nucl 10, cyto 4
proteinId294176	-1.70128	0.0648763	-5.52312	9.00162e-11	-3.82184	1.10251e-05	31.8999	57.3999	1.09854					cyto 12, cysk 12, cyto_nucl 6.833, cyto_mito 6.833	LDB19
proteinId294231	4.95905	NA	-0.0130513	0.998233	-4.9721	0.0229069	4.17759	0	0	KOG4177	Ankyrin	Cell wall/membrane/envelope biogenesis	CELLULAR PROCESSES AND SIGNALING	cyto_nucl 9, nucl 8, cyto 8, pero 6, mito 4	Ank_2,Ank,Ank_5,Ank_4,Ank_3
proteinId294569	-0.256608	0.700018	-8.17795	8.56546e-09	-7.92134	3.28752e-08	24.0758	14.8729	0	KOG1471	Phosphatidylinositol transfer protein SEC14 and related proteins	Lipid transport and metabolism	METABOLISM	mito 20, cyto 4.5, cyto_nucl 3.5	CRAL_TRIO
proteinId294615	-2.04091	5.53783e-07	-2.2716	6.93317e-09	-0.230694	0.608895	1464.12	3160.28	661.797					mito 10, plas 8, E.R. 3, pero 2, nucl 1, cyto 1, extr 1, cyto_nucl 1, vacu 1
proteinId294648	0.37493	0.505999	2.44666	6.21697e-08	2.07173	4.01992e-06	18.4825	7.25084	41.2805					cyto 12, cyto_nucl 10.666, cyto_mito 8.499, cyto_pero 7.499, nucl 7, mito 3.5	HNH_2
proteinId29471	0.382292	0.335079	-1.98565	2.88105e-08	-2.36794	2.48319e-11	31.0652	12.1653	3.10156	KOG4776	Uncharacterized conserved protein BCNT	Function unknown	POORLY CHARACTERIZED	nucl 22, cyto 5	BCNT
proteinId294744	-2.41783	9.15155e-10	-8.54469	1.43099e-15	-6.12686	1.87085e-08	47.2544	130.466	0.201861	KOG3078	Adenylate kinase	Nucleotide transport and metabolism	METABOLISM	cyto_nucl 12.5, cyto 12, nucl 7, cysk 5	ADK
proteinId294771	-0.555287	0.416898	-4.42524	4.7526e-11	-3.86995	1.22645e-08	22.4501	17.2251	0.765868					mito 12, plas 5, extr 5, cyto 2, pero 1, E.R. 1, vacu 1	AIG2_2
proteinId294775	-1.114	0.0681745	-3.69268	6.19846e-11	-2.57868	7.56232e-06	30.1126	33.7186	2.57866	KOG0198	MEKK and related serine/threonine protein kinases	Signal transduction mechanisms	CELLULAR PROCESSES AND SIGNALING	nucl 12, cyto 8, pero 5	Pkinase,Pkinase_Tyr
proteinId294798	2.34009	0.000350802	0.592688	0.39024	-1.7474	0.00502799	45.0339	4.36821	6.83511					nucl 11.5, cyto_nucl 9.833, cyto 7, cyto_pero 4.833, mito 4, cysk 3
proteinId294823	-0.480122	0.436312	-2.0207	9.95928e-05	-1.54058	0.00372635	66.9961	47.4019	11.7169					mito 18, cyto 5, nucl 3	Acetyltransf_4,Acetyltransf_1
proteinId294841	-0.66435	0.311458	0.183717	0.771619	0.848067	0.152	22.1868	17.8192	20.832	KOG1381	Para-hydroxybenzoate-polyprenyl transferase	Coenzyme transport and metabolism	METABOLISM	extr 11, mito 8, cyto 3, plas 2, E.R. 2	UbiA
proteinId295120	-0.367405	0.429346	-1.6598	4.45736e-05	-1.29239	0.00172808	16.4301	10.9055	3.50252	KOG0161	Myosin class II heavy chain	Cytoskeleton	CELLULAR PROCESSES AND SIGNALING	nucl 21, mito 4	Kinetocho_Slk19,ATG16
proteinId295367	-2.78942	7.51741e-15	-3.03991	5.97263e-18	-0.250491	0.533481	86.7595	311.946	38.3648	KOG1504	Ornithine carbamoyltransferase OTC/ARG3	Amino acid transport and metabolism	METABOLISM	mito 13.5, cyto_mito 13, cyto 11.5	OTCace,OTCace_N
proteinId295497	-1.98434	5.30789e-06	-6.18259	1.25055e-48	-4.19825	7.90245e-23	349.77	711.107	9.58193	KOG3072	Long chain fatty acid elongase	Lipid transport and metabolism	METABOLISM	plas 24, E.R. 2	ELO
proteinId295506	5.93849	0.000126731	8.86819	1.17295e-09	2.92971	3.66495e-08	10.256	0	42.3899					mito 14, extr 6, nucl 5	PLAC8
proteinId295641	0.267449	0.681843	-2.84303	4.91602e-06	-3.11048	4.61924e-07	22.889	9.75566	1.33282	KOG2389	Predicted bromodomain transcription factor	Transcription	INFORMATION STORAGE AND PROCESSING	cyto 9.5, cysk 8, cyto_nucl 6.5, pero 4, mito 3	Bromo_TP
proteinId296019	3.29612	1.53431e-10	2.98606	3.16733e-09	-0.310053	0.559074	120.615	6.17277	51.5771					cyto 8, mito 7, E.R. 4, mito_nucl 4, pero 3
proteinId296032	-0.457459	0.515266	-2.07665	0.000516677	-1.61919	0.00810641	25.7447	18.0588	4.29855					cyto_nucl 8.5, nucl 8, mito 7, cyto 7, pero 2	DUF4112
proteinId296082	1.09615	0.0340957	3.47092	4.95326e-14	2.37476	1.91512e-07	19.7964	4.76172	55.1769	KOG2820	FAD-dependent oxidoreductase	General function prediction only	POORLY CHARACTERIZED	cyto 12, mito 9, extr 4	DAO
proteinId296123	-1.45206	2.26645e-05	-1.12296	0.000751655	0.329101	0.369534	43.6028	61.0407	28.5017	KOG4134	DNA-dependent RNA polymerase I	Transcription	INFORMATION STORAGE AND PROCESSING	cyto 13, cyto_mito 10.333, cyto_nucl 8.833, mito 6.5, nucl 3.5	SHS2_Rpb7-N
proteinId296257	-0.386758	0.422975	-3.68527	7.19889e-17	-3.29852	1.16255e-13	29.3189	19.6937	1.50891	KOG2478	Putative RNA polymerase II regulator	Transcription	INFORMATION STORAGE AND PROCESSING	nucl 15.5, cyto_nucl 13, cyto 7.5, mito 3	Paf1
proteinId296334	-0.257084	NA	1.55992	0.501152	1.81701	0.445669	0	0	0.111418	KOG0504	FOG: Ankyrin repeat	General function prediction only	POORLY CHARACTERIZED	cyto 14.5, cyto_nucl 13.333, cyto_pero 9.332, nucl 8	Ank_2,Ank_4,Ank,Ank_5,Ank_3
proteinId296350	2.08997	NA	-0.00526462	0.998233	-2.09524	0.383309	0.601909	0	0					nucl 10.5, cyto_nucl 10, cyto 8.5, mito 6
proteinId296421	-1.86419	NA	-1.62326	0.483344	0.24093	0.923256	0	0.155226	0	KOG0504	FOG: Ankyrin repeat	General function prediction only	POORLY CHARACTERIZED	cyto 27	Ank_5,Ank_4,Ank_2,Ank,Ank_3
proteinId296460	1.07548	0.286474	2.70562	0.00162021	1.63014	0.0521695	9.167	2.17233	15.4913					cyto 9.5, cyto_pero 8.166, cyto_nucl 7.833, cysk 6, pero 5.5, nucl 4	DPBB_1
proteinId29655	0.0230912	0.957857	1.21484	8.9734e-05	1.19174	0.000125143	26.6176	13.3985	31.8876	KOG1342	Histone deacetylase complex, catalytic component RPD3	Chromatin structure and dynamics	INFORMATION STORAGE AND PROCESSING	cyto 10.5, cyto_nucl 9.833, cyto_pero 7.166, nucl 7, extr 4, mito 3	Hist_deacetyl
proteinId296575	0.312	0.584685	-4.38436	2.43143e-14	-4.69636	3.14955e-16	198.318	81.9161	3.70663	KOG3507	DNA-directed RNA polymerase, subunit RPB7.0	Transcription	INFORMATION STORAGE AND PROCESSING	cyto_nucl 16, cyto 12.5, nucl 10.5	DNA_RNApol_7kD
proteinId296614	-1.29358	0.0536531	-2.09869	0.0015189	-0.805103	0.262382	3.04332	3.88698	0.896311	KOG1950	Glycosyl transferase, family 8 - glycogenin	Carbohydrate transport and metabolism	METABOLISM	mito 13, extr 10, cyto 3	Glyco_transf_8
proteinId296695	4.08999	0.0105365	3.10617	0.0437715	-0.983827	0.448124	5.70027	0.0968996	1.41028	KOG1717	Dual specificity phosphatase	Defense mechanisms	CELLULAR PROCESSES AND SIGNALING	mito 13.5, cyto_mito 12.499, cyto 10, cyto_nucl 8.333	DSPc
proteinId296704	0.242562	0.693593	-5.46553	7.54462e-12	-5.70809	9.89564e-13	48.1334	20.9287	0.392456					mito 20, nucl 3, extr 2, cyto_nucl 2	SET
proteinId296826	-0.475211	0.403728	-2.86389	3.52675e-08	-2.38868	5.41467e-06	23.1183	16.5178	2.22988	KOG2967	Uncharacterized conserved protein	Function unknown	POORLY CHARACTERIZED	nucl 16, mito 9.5, cyto_mito 6	tRNA_m1G_MT
proteinId296827	-0.612765	0.120471	-2.40144	2.85915e-11	-1.78867	1.0277e-06	23.517	18.4566	3.51519	KOG1238	Glucose dehydrogenase/choline dehydrogenase/mandelonitrile lyase (GMC oxidoreductase family)	General function prediction only	POORLY CHARACTERIZED	mito 9, cyto 8, cysk 6, extr 2	GMC_oxred_N,GMC_oxred_C
proteinId296842	1.88645	1.19363e-05	-1.98579	3.72439e-05	-3.87224	5.86673e-17	82.9419	11.3407	2.88067					nucl 15.5, cyto_nucl 12.5, cyto 6.5, mito 5
proteinId296939	0.0402847	0.936531	-2.16594	3.85392e-08	-2.20622	2.10744e-08	70.4999	35.3443	7.95616	KOG3423	Transcription initiation factor TFIID, subunit TAF10 (also component of histone acetyltransferase SAGA)	Transcription	INFORMATION STORAGE AND PROCESSING	cyto_mito 11.166, mito 11, cyto 11	TFIID_30kDa
proteinId296968	-2.15958	1.34504e-06	-4.41104	1.37804e-24	-2.25146	3.33975e-07	100.241	230.249	10.6822	KOG2529	Pseudouridine synthase	Translation, ribosomal structure and biogenesis	INFORMATION STORAGE AND PROCESSING	cyto 14.5, cyto_nucl 12, nucl 8.5, pero 3	DKCLD,TruB_N,PUA
proteinId296984	2.71074	1.68317e-07	3.05236	1.04917e-09	0.341613	0.506157	24.812	1.8826	16.4606					cysk 7, cyto 6, nucl 5, cyto_mito 5, mito 4, cyto_pero 4	Glyco_hydro_76
proteinId297073	5.87351	0.000451188	6.47593	4.444e-05	0.602422	0.452517	10.9742	0	8.81115	KOG4177	Ankyrin	Cell wall/membrane/envelope biogenesis	CELLULAR PROCESSES AND SIGNALING	cyto 13.5, cyto_nucl 12, extr 6, nucl 5.5	Ank_2,Ank,Ank_5,Ank_3,Ank_4
proteinId297074	NA	NA	NA	NA	NA	NA	0	0	0					plas 18, mito 5, vacu 4
proteinId297087	0.527671	0.293814	-2.81031	3.02061e-08	-3.33798	2.8344e-11	46.8312	16.6638	2.36846	KOG3349	Predicted glycosyltransferase	General function prediction only	POORLY CHARACTERIZED	mito 14, extr 9, cyto 3.5	Glyco_tran_28_C
proteinId297125	1.08111	0.0444126	0.53553	0.311082	-0.545579	0.295868	16.7516	4.03781	6.01417	KOG3969	Uncharacterized conserved protein	Function unknown	POORLY CHARACTERIZED	mito 8, cyto 8, cyto_mito 8, nucl 5	DcpS_C,DcpS
proteinId297131	-0.815121	0.0387074	-5.58677	7.21148e-27	-4.77165	1.00712e-19	53.5577	48.4789	0.955447	KOG3327	Thymidylate kinase/adenylate kinase	Nucleotide transport and metabolism	METABOLISM	nucl 12, mito_nucl 10.166, cyto_nucl 9.666, cyto_mito 7.166, mito 7, cyto 6	Thymidylate_kin
proteinId297151	NA	NA	NA	NA	NA	NA	0	0	0	KOG4177	Ankyrin	Cell wall/membrane/envelope biogenesis	CELLULAR PROCESSES AND SIGNALING	cyto 11, extr 9, cyto_nucl 8, nucl 3, mito 2, pero 2	Ank,Ank_2,Ank_3,Ank_5,Ank_4
proteinId297202	9.02344	5.2921e-07	-0.0178057	0.998233	-9.04124	2.24472e-07	102.01	0	0	KOG0118	FOG: RRM domain	General function prediction only	POORLY CHARACTERIZED	cyto 14, cyto_mito 12.333, mito 9.5, cyto_nucl 8.333	RRM_1,RRM_6,RRM_5
proteinId297434	5.73294	0.00885645	-0.0143688	0.998233	-5.74731	0.00572096	2.41075	0	0	KOG0588	Serine/threonine protein kinase	Cell cycle control, cell division, chromosome partitioning	METABOLISM	cyto 11, pero 9, cysk 5	Pkinase,Pkinase_Tyr,APH
proteinId297530	NA	NA	NA	NA	NA	NA	0	0	0					extr 17, mito 4, cyto 4, cyto_nucl 4
proteinId297559	1.05852	0.062916	-1.93965	0.00127268	-2.99817	2.55593e-07	18.6995	4.53861	1.17152	KOG4476	Gluconate transport-inducing protein	Carbohydrate transport and metabolism	METABOLISM	nucl 12, cysk 6, mito 5, cyto 4	Gti1_Pac2
proteinId297607	0.490887	0.521597	-0.555912	0.433597	-1.0468	0.121149	19.6282	7.10461	4.88174	KOG3219	Transcription initiation factor TFIID, subunit TAF11	Transcription	INFORMATION STORAGE AND PROCESSING	cyto 8, cyto_nucl 8, pero 7, nucl 6, mito 4	TAFII28
proteinId297680	0.311448	0.734004	-4.28512	8.56436e-05	-4.59657	2.47312e-05	10.8705	4.45987	0.177127	KOG1716	Dual specificity phosphatase	Defense mechanisms	CELLULAR PROCESSES AND SIGNALING	cyto 9, cyto_nucl 8.833, cyto_mito 8.499, mito 6.5, nucl 5.5, extr 5	DSPc
proteinId297687	0.238211	0.731378	-2.60981	9.44642e-06	-2.84802	1.24476e-06	46.0234	19.9114	3.18963					mito 21, nucl 4
proteinId297691	-0.518705	0.39857	-5.10545	3.12263e-15	-4.58675	2.11484e-12	102.233	75.2341	2.08717	KOG4209	Splicing factor RNPS1, SR protein superfamily	RNA processing and modification	INFORMATION STORAGE AND PROCESSING	cyto_nucl 15, nucl 14.5, cyto 10.5	RRM_1,RRM_6,RRM_5
proteinId297752	-0.616043	0.0800991	-0.375828	0.262219	0.240216	0.495892	100.065	79.1503	62.2039	KOG0171	Mitochondrial inner membrane protease, subunit IMP1	Posttranslational modification, protein turnover, chaperones	CELLULAR PROCESSES AND SIGNALING	mito 7, cyto 6, extr 6, cyto_nucl 5.333, mito_nucl 5.333, cyto_pero 4.833	Peptidase_S26
proteinId297753	3.04821	0.0947766	-2.17618	0.309525	-5.22439	0.00888072	8.07211	0.380822	0	KOG4177	Ankyrin	Cell wall/membrane/envelope biogenesis	CELLULAR PROCESSES AND SIGNALING	cyto 19, extr 6	Ank_4,Ank,Ank_2,Ank_3,Ank_5
proteinId297758	-0.633157	0.16535	-4.24636	3.06017e-18	-3.61321	1.97433e-13	93.0407	74.1324	3.86747	KOG3214	Uncharacterized Zn ribbon-containing protein	Function unknown	POORLY CHARACTERIZED	nucl 13, mito_nucl 11.833, mito 9.5, cyto_nucl 9.333	Elf1
proteinId297805	0.547336	0.267053	-2.76515	5.87989e-08	-3.31248	4.55656e-11	46.9916	16.4228	2.39835	KOG4639	RNase P/RNase MRP subunit POP5	Translation, ribosomal structure and biogenesis	INFORMATION STORAGE AND PROCESSING	mito 23.5, cyto_mito 14	RNase_P_Rpp14
proteinId297844	-1.68748	0.0017638	-5.31196	5.80218e-14	-3.62447	5.38551e-07	22.8941	38.7323	0.896851					mito 12, extr 6, mito_nucl 6, plas 5	MBOAT_2
proteinId297921	4.76661	0.0285791	2.4851	0.246757	-2.28151	0.217088	8.41242	0	0.706515	KOG1677	CCCH-type Zn-finger protein	General function prediction only	POORLY CHARACTERIZED	mito 21, cyto 3, nucl 2	zf-CCCH
proteinId297924	0.459066	NA	2.92799	0.107208	2.46892	0.15192	0.351658	0.108205	1.3475					cyto_nucl 11.5, nucl 10.5, cyto 9.5, mito 3, pero 3	DDE_Tnp_4
proteinId29809	-0.811733	0.0308563	0.0169643	0.979029	0.828697	0.01953	5.09195	4.59202	4.74992	KOG3724	Negative regulator of COPII vesicle formation	Intracellular trafficking, secretion, and vesicular transport	CELLULAR PROCESSES AND SIGNALING	plas 23, mito 1, cyto 1, E.R. 1, golg 1, cyto_mito 1	PGAP1,Abhydrolase_5
proteinId298243	-2.06758	4.59478e-09	-3.67179	3.75125e-23	-1.60421	3.06561e-05	42.4561	91.3916	7.20316	KOG4208	Nucleolar RNA-binding protein NIFK	General function prediction only	POORLY CHARACTERIZED	cyto 15, cyto_nucl 12, nucl 7, mito 4	RRM_1,RRM_6,RRM_5
proteinId298245	0.21845	0.667511	-0.661696	0.116655	-0.880146	0.0353819	101.885	44.537	28.562	KOG0015	Regulator of arginine metabolism and related MADS box-containing transcription factors	Transcription	INFORMATION STORAGE AND PROCESSING	nucl 14.5, mito 11, cyto_nucl 8	SRF-TF
proteinId298262	-0.582438	0.840847	7.45633	7.51403e-05	8.03876	8.99679e-06	0	0	10.1323					cyto 17.5, cyto_nucl 11, pero 2, vacu 2, mito 1, plas 1, extr 1, cysk 1	Ank,Ank_2,Ank_3
proteinId298374	1.88277	0.164159	0.309085	0.832369	-1.57369	0.209349	8.21069	1.03309	1.35688	KOG1045	Uncharacterized conserved protein HEN1/CORYMBOSA2	Function unknown	POORLY CHARACTERIZED	nucl 8, cyto 8, cyto_nucl 8, cysk 5, cyto_mito 5, mito_nucl 5, cyto_pero 5
proteinId298390	-0.883495	0.071802	-2.24591	8.41714e-07	-1.36242	0.00375675	59.0761	55.8168	11.8571	KOG1120	Fe-S cluster biosynthesis protein ISA1 (contains a HesB-like domain)	Inorganic ion transport and metabolism	METABOLISM	mito 22, nucl 3	Fe-S_biosyn
proteinId298418	NA	NA	NA	NA	NA	NA	0	0	0					mito 17, cyto 7, pero 2
proteinId298473	-0.492095	0.326258	-4.54082	3.05047e-15	-4.04873	2.86266e-12	16.1096	11.6054	0.478554	KOG2554	Pseudouridylate synthase	Translation, ribosomal structure and biogenesis	INFORMATION STORAGE AND PROCESSING	nucl 12, cyto_nucl 9.833, cyto_mito 6.166, mito 5.5, cyto 5.5	PseudoU_synth_1
proteinId298483	6.01691	0.000980726	4.01455	0.0247191	-2.00236	0.0717917	18.9372	0	2.31762	KOG1721	FOG: Zn-finger	General function prediction only	POORLY CHARACTERIZED	nucl 18.5, cyto_nucl 11, mito 6	zf-C2H2,zf-C2H2_4,zf-H2C2_2,zf-C2H2_6
proteinId298610	NA	NA	NA	NA	NA	NA	0	0	0					mito 15, cyto 7.5, cyto_nucl 6.5, nucl 4.5
proteinId298756	-2.04919	1.02028e-07	-2.52596	9.05153e-12	-0.476769	0.240527	2012.61	4365.87	765.261					mito 7, extr 6, mito_nucl 6, nucl 5, vacu 3	COX7C
proteinId298779	-2.02912	2.19974e-08	-5.50236	8.87651e-39	-3.47324	6.81086e-16	168.557	357.944	7.80237	KOG2923	Uncharacterized conserved protein	Function unknown	POORLY CHARACTERIZED	cyto_nucl 13.5, nucl 12.5, cyto 11.5	zf-CSL
proteinId298793	-1.01614	0.0363047	-4.30526	2.09844e-13	-3.28912	3.33138e-08	15.7037	16.3241	0.794493	KOG1605	TFIIF-interacting CTD phosphatase, including NLI-interacting factor (involved in RNA polymerase II regulation)	Transcription	INFORMATION STORAGE AND PROCESSING	mito 13, cyto_nucl 6.833, nucl 6.5, cyto 6, cyto_pero 4.333	NIF
proteinId298812	0.475852	0.601969	-6.0075	0.000154431	-6.48335	4.79176e-05	14.0625	5.13926	0					cyto 12, cyto_nucl 8, extr 7, mito 4, nucl 2	IIGP,MMR_HSR1
proteinId298876	-0.989437	0.0329211	-0.12457	0.797978	0.864867	0.0508381	13.043	13.317	12.5186	KOG4132	Uroporphyrinogen III synthase UROS/HEM4	Coenzyme transport and metabolism	METABOLISM	cyto 17.5, cyto_nucl 10.5, mito 4, pero 3	HEM4
proteinId298900	0.937108	0.0194614	-1.32169	0.00102809	-2.25879	6.43401e-09	12.9194	3.43185	1.38956	KOG3780	Thioredoxin binding protein TBP-2/VDUP1	General function prediction only	POORLY CHARACTERIZED	nucl 12.5, mito 10, cyto_nucl 9, cyto 4.5	Arrestin_C,Arrestin_N
proteinId298987	0.495322	0.30839	-0.526118	0.245494	-1.02144	0.018643	26.6675	9.60547	6.79299	KOG3030	Lipid phosphate phosphatase and related enzymes of the PAP2 family	Lipid transport and metabolism	METABOLISM	plas 25	PAP2
proteinId299003	1.67055	NA	-0.00889727	0.998233	-1.67945	0.485228	0.368731	0	0	KOG1721	FOG: Zn-finger	General function prediction only	POORLY CHARACTERIZED	mito 15, cyto 8, cyto_nucl 7, nucl 4	zf-H2C2_2,zf-C2H2,zf-C2H2_4
proteinId299198	NA	NA	NA	NA	NA	NA	0	0	0	KOG4177	Ankyrin	Cell wall/membrane/envelope biogenesis	CELLULAR PROCESSES AND SIGNALING	cyto 15.5, cyto_nucl 13.5, nucl 8.5	Ank_4,Ank_2,Ank_5
proteinId299284	-1.66728	7.76405e-05	-1.39423	0.000785353	0.273045	0.564052	5.7611	9.46824	3.65536	KOG2798	Putative trehalase	Carbohydrate transport and metabolism	METABOLISM	mito 16.5, cyto_mito 10.5, cyto 3.5, extr 3, nucl 2	N2227,Methyltransf_12
proteinId299302	0.429453	0.466916	-0.59478	0.266559	-1.02423	0.0474707	34.0733	13.0192	8.75886					nucl 10, mito 7, cyto 6, pero 3	Rdx
proteinId299309	1.80807	0.436342	6.24971	0.000779061	4.44164	0.00144387	0.314935	0	4.68414					mito 16, nucl 6.5, cyto_nucl 6, cyto 4.5
proteinId299331	0.94684	0.149475	-1.47862	0.0224992	-2.42546	0.000105289	23.4563	6.19789	2.19933	KOG4141	DNA repair and recombination protein RAD52/RAD22	Replication, recombination and repair	INFORMATION STORAGE AND PROCESSING	cyto 11, mito 10.5, mito_nucl 8, nucl 4.5	Rad52_Rad22
proteinId299395	-0.221138	0.636317	0.931774	0.0123127	1.15291	0.00176704	10.5797	6.32339	12.3995	KOG0322	G-protein beta subunit-like protein GNB1L, contains WD repeats	General function prediction only	POORLY CHARACTERIZED	mito 21, cyto 4	WD40
proteinId299472	-0.00873856	0.990883	-0.540525	0.307179	-0.531787	0.327623	33.2669	17.0754	12.0128					nucl 17.5, cyto_nucl 13.5, cyto 8.5	HhH-GPD
proteinId299534	0.0875256	0.889338	-1.3485	0.00573643	-1.43602	0.00339896	52.0858	25.1867	10.0421					mito 11, extr 7, mito_nucl 7
proteinId299541	-0.354843	NA	4.08665	0.0732976	4.44149	0.0533505	0	0	1.1577					mito 14, cyto 6.5, cyto_nucl 6, nucl 4.5
proteinId299549	-0.428981	0.221489	0.5606	0.0725305	0.989581	0.0012466	32.5525	22.4956	33.9715	KOG3094	Predicted membrane protein	Function unknown	POORLY CHARACTERIZED	plas 23, mito 2	YIF1
proteinId299552	1.18	NA	-0.00889727	0.998233	-1.1889	0.625726	0.252289	0	0	KOG4177	Ankyrin	Cell wall/membrane/envelope biogenesis	CELLULAR PROCESSES AND SIGNALING	cyto 22, cyto_nucl 13, nucl 2, mito 2	Ank_4,Ank,Ank_2,Ank_3
proteinId299576	2.27299	2.77239e-05	-6.74408	2.85682e-06	-9.01707	3.55485e-10	33.0142	3.39927	0					mito 11, cyto 10.5, cyto_pero 6.5, nucl 3	HET
proteinId299603	3.34613	NA	-0.0090877	0.998233	-3.35521	0.159758	1.85456	0	0					nucl 18, cyto_nucl 12, cyto 4, mito 3	DDE_3
proteinId299649	NA	NA	NA	NA	NA	NA	0	0	0					nucl 20.5, cyto_nucl 12, mito 3	TPR_10,TPR_12
proteinId299652	NA	NA	NA	NA	NA	NA	0	0	0					cyto 18, mito 9, cyto_nucl 9, cyto_pero 9
proteinId299670	-2.7345	1.76378e-31	-2.97542	7.08909e-38	-0.240922	0.354798	1765.4	6051.7	780.714	KOG3502	40S ribosomal protein S28	Translation, ribosomal structure and biogenesis	INFORMATION STORAGE AND PROCESSING	mito 19, nucl 6, cyto_nucl 5	Ribosomal_S28e
proteinId299676	0.263952	0.560176	-1.63591	7.84994e-06	-1.89987	2.26911e-07	406.624	173.768	56.3758					cyto 10.5, cyto_nucl 10.5, nucl 7.5, mito 5, pero 4	DPBB_1
proteinId299679	2.08997	NA	-0.00526462	0.998233	-2.09524	0.383309	0.416025	0	0					nucl 14, cyto_nucl 11.666, mito_nucl 8.833, cyto 8, cyto_pero 5.333	DDE_1
proteinId299808	0.143211	NA	-1.13881	0.639407	-1.28202	0.608301	0.219549	0.0991187	0					cyto 10.5, cyto_nucl 10.5, nucl 9.5, mito 6
proteinId29985	-0.0355683	0.970959	5.01464	9.02841e-17	5.05021	3.71331e-20	3.27233	1.72078	59.9744					plas 16, E.R. 4, mito 3, extr 3
proteinId299856	5.29508	0.00325284	6.43775	0.000129888	1.14266	0.337374	6.32932	0	7.53834	KOG4075	Cytochrome c oxidase, subunit IV/COX5b	Energy production and conversion	METABOLISM	cyto 6.5, mito 6, cyto_nucl 6, plas 5, nucl 4.5, pero 4	COX4
proteinId299863	-1.34036	0.000547279	-3.08082	1.45558e-15	-1.74046	1.12567e-05	27.6061	35.8653	4.24212	KOG3996	Holocytochrome c synthase/heme-lyase	Energy production and conversion	METABOLISM	nucl 16, mito 5, cyto 5, cyto_mito 5	Cyto_heme_lyase
proteinId299881	2.18213	NA	1.03254	0.680279	-1.14959	0.65341	1.09417	0	0.15359	KOG0505	Myosin phosphatase, regulatory subunit	Posttranslational modification, protein turnover, chaperones	CELLULAR PROCESSES AND SIGNALING	cyto_nucl 11, nucl 9, cyto 9, mito 4, extr 3	Ank,Ank_2,Ank_4,Ank_3,Ank_5
proteinId299956	4.18851	2.33431e-12	3.56476	1.12412e-09	-0.62375	0.315076	108.17	2.9097	36.7502					cyto 9, cysk 9, mito 4, nucl 2, pero 2	ADP_ribosyl_GH
proteinId299957	NA	NA	NA	NA	NA	NA	0	0	0					mito 14, nucl 9, cyto_nucl 7, cyto 3	Ank_2,Ank_4,Ank_5
proteinId300011	-0.527452	0.238161	-1.79634	1.04461e-05	-1.26889	0.00227158	32.3469	23.8281	6.93765	KOG4484	Uncharacterized conserved protein	Function unknown	POORLY CHARACTERIZED	nucl 22, cyto 3	DUF2361
proteinId300061	-2.79706	NA	-4.60631	0.0267961	-1.80925	0.430045	0.29213	1.46772	0					extr 13, cyto 7, nucl 4, cyto_mito 4
proteinId300189	-0.541119	0.261949	-2.27542	2.13826e-07	-1.7343	9.80659e-05	30.5318	22.9192	4.78089	KOG3041	Nucleoside diphosphate-sugar hydrolase of the MutT (NUDIX) family	Replication, recombination and repair	INFORMATION STORAGE AND PROCESSING	cyto 18, mito 6, nucl 3	NUDIX
proteinId300211	-0.497726	0.235341	-3.47276	3.46181e-21	-2.97503	1.01423e-15	211.491	152.486	13.723	KOG0087	GTPase Rab11/YPT3, small G protein superfamily	Intracellular trafficking, secretion, and vesicular transport	CELLULAR PROCESSES AND SIGNALING	cyto 21.5, cyto_nucl 13.333, cyto_mito 12.666, nucl 3	Ras,Miro,Arf,MMR_HSR1
proteinId300212	-1.1077	0.00236405	-0.90639	0.00948012	0.201311	0.60791	29.1558	32.3118	17.5173	KOG1208	Dehydrogenases with different specificities (related to short-chain alcohol dehydrogenases)	Secondary metabolites biosynthesis, transport and catabolism	METABOLISM	cysk 15, mito 5, cyto 4, nucl 2, cyto_pero 2
proteinId300229	-1.53445	0.0123931	-0.136647	0.83477	1.3978	0.0173737	3.71825	5.61935	5.18618	KOG0725	Reductases with broad range of substrate specificities	General function prediction only	POORLY CHARACTERIZED	mito 21, cyto 5.5, cyto_nucl 3.5	adh_short,adh_short_C2,KR,Epimerase,Polysacc_synt_2
proteinId300241	-0.23406	0.578821	1.24957	0.000211298	1.48363	1.06528e-05	115.554	69.7167	170.014	KOG3413	Mitochondrial matrix protein frataxin, involved in Fe/S protein biosynthesis	Inorganic ion transport and metabolism	METABOLISM	nucl 18, cyto_nucl 12.833, cyto 5.5, cyto_pero 4.166	Frataxin_Cyay
proteinId300264	0.129247	0.790593	-2.24049	3.30312e-08	-2.36973	4.35727e-09	98.2007	45.8851	9.8144					nucl 12, mito 8, cyto_nucl 8	G-gamma
proteinId300266	0.306291	0.49547	-3.30752	8.34727e-18	-3.61381	6.42884e-21	51.4711	21.0991	2.13251	KOG0446	Vacuolar sorting protein VPS1, dynamin, and related proteins	General function prediction only	POORLY CHARACTERIZED	mito 15.5, cyto_mito 11, cyto 5.5, nucl 5	Dynamin_N,Dynamin_M
proteinId300272	1.31139	0.0331609	-1.42493	0.0186552	-2.73632	3.07999e-06	19.7307	4.08312	1.5181	KOG2178	Predicted sugar kinase	Carbohydrate transport and metabolism	METABOLISM	nucl 10.5, cyto_nucl 9.833, cyto 8, cyto_pero 6.333, pero 3.5, mito 3	NAD_kinase
proteinId300279	-0.0429361	0.938596	-4.78768	1.66219e-24	-4.74474	6.33408e-24	201.457	106.644	3.77805	KOG3641	Zinc carboxypeptidase	Amino acid transport and metabolism	METABOLISM	mito 23, nucl 3	DUF2638
proteinId300349	3.266	9.7123e-12	3.27153	2.9848e-12	0.00553038	0.991358	25.5816	1.31026	13.267	KOG0039	Ferric reductase, NADH/NADPH oxidase and related proteins	Secondary metabolites biosynthesis, transport and catabolism	METABOLISM	plas 26	NAD_binding_6,Ferric_reduct,FAD_binding_8
proteinId300376	-0.89895	0.0028688	-1.72904	8.92349e-10	-0.830094	0.0045747	153.435	147.109	45.1706	KOG1693	emp24/gp25L/p24 family of membrane trafficking proteins	Intracellular trafficking, secretion, and vesicular transport	CELLULAR PROCESSES AND SIGNALING	extr 7, E.R. 7, cyto 5, cyto_nucl 4.5, mito 4, nucl 2	EMP24_GP25L
proteinId300416	-2.07617	3.51406e-07	-3.37896	1.52854e-15	-1.3028	0.00352119	5.49087	11.9111	1.1416	KOG0751	Mitochondrial aspartate/glutamate carrier protein Aralar/Citrin (contains EF-hand Ca2+-binding domains)	Energy production and conversion	METABOLISM	cyto 13, cyto_nucl 10.5, nucl 6, pero 5	Mito_carr,EF-hand_6,EF-hand_7,EF-hand_1,EF-hand_8,EF-hand_5
proteinId300477	-0.498272	0.173605	-1.17511	0.000325245	-0.67684	0.0465757	33.8493	24.6208	11.0992	KOG0053	Cystathionine beta-lyases/cystathionine gamma-synthases	Amino acid transport and metabolism	METABOLISM	cyto 13, cyto_nucl 11.833, nucl 7.5, cyto_pero 7.499, mito 5	Cys_Met_Meta_PP
proteinId300478	7.34107	6.12159e-21	6.92782	2.38319e-19	-0.413251	0.483112	405.023	1.0426	158.859					nucl 14, mito_nucl 10.833, cyto_nucl 10.333, mito 6.5, cyto 5.5
proteinId300484	-0.395081	0.175614	1.04377	4.03885e-05	1.43886	1.49335e-08	2022.9	1363.93	2879.92	KOG0907	Thioredoxin	Posttranslational modification, protein turnover, chaperones	CELLULAR PROCESSES AND SIGNALING	cyto 17.5, cyto_nucl 12, nucl 3.5, mito 3	Thioredoxin,Thioredoxin_2,Thioredoxin_8,AhpC-TSA,Redoxin,Thioredoxin_9
proteinId300493	-2.71884	7.02837e-12	-2.9498	2.30351e-14	-0.230955	0.604979	103.21	356.815	46.3558	KOG3846	L-kynurenine hydrolase	Amino acid transport and metabolism	METABOLISM	cyto 8, cysk 7, pero 5, nucl 3, mito 3, mito_nucl 3	Aminotran_5
proteinId300558	0.0532426	0.955005	-3.80765	2.02537e-07	-3.86089	1.5945e-07	5.46331	2.67729	0.176726	KOG1874	KEKE-like motif-containing transcription regulator (Rlr1)/suppressor of sin4	Transcription	INFORMATION STORAGE AND PROCESSING	nucl 13.5, cyto_nucl 9.5, cyto 4.5, mito 4, plas 3	Tho2,Thoc2
proteinId300571	-0.437343	0.256998	-2.62083	4.20258e-14	-2.18349	4.41642e-10	60.3464	42.1158	6.91179	KOG0028	Ca2+-binding protein (centrin/caltractin), EF-Hand superfamily protein	Cytoskeleton	CELLULAR PROCESSES AND SIGNALING	mito 15, nucl 5, cyto 5, cyto_nucl 5	EF-hand_8,EF-hand_7,EF-hand_1,EF-hand_6,EF-hand_5
proteinId300724	-0.323421	0.532728	-4.09121	4.15933e-20	-3.76779	4.43376e-17	38.8221	25.0635	1.46459	KOG0564	5,10-methylenetetrahydrofolate reductase	Amino acid transport and metabolism	METABOLISM	cyto 16.5, cyto_pero 11.5, pero 5.5, nucl 4	MTHFR
proteinId300739	-0.0619479	0.901099	-1.2143	0.00125163	-1.15236	0.00248484	37.993	20.2215	8.8546					plas 26	ATG22,MFS_2,MFS_1
proteinId300757	0.417027	0.389832	-0.946513	0.0255301	-1.36354	0.00111173	15.5411	5.95456	3.12076	KOG2310	DNA repair exonuclease MRE11	Replication, recombination and repair	INFORMATION STORAGE AND PROCESSING	cyto 13, cyto_nucl 13, nucl 11	Mre11_DNA_bind,Metallophos
proteinId300759	-0.702525	0.111431	-0.699121	0.0863669	0.00340395	0.993955	19.7693	16.6733	10.477	KOG0680	Actin-related protein - Arp6p	Cytoskeleton	CELLULAR PROCESSES AND SIGNALING	nucl 11, cyto 8, pero 4, mito 3	Actin
proteinId300763	2.61483	0.254793	5.19846	0.00848992	2.58363	0.131034	0.790469	0	3.13169					cysk 15, pero 7, cyto 4	TPMT
proteinId3008	4.64005	6.68695e-07	5.53713	6.23236e-10	0.897076	0.234761	10.0895	0.165901	9.77993					plas 13, mito 4, E.R. 4, extr 3, cyto_mito 3
proteinId300811	0.101532	0.843424	0.443307	0.276669	0.341776	0.415754	28.6515	13.6806	18.9981					mito 13, cyto 7, cyto_pero 6.833, pero 5.5, cyto_nucl 4.833	AOX
proteinId300813	1.2946	0.011341	1.77574	0.000179038	0.481146	0.338321	14.5419	2.98171	10.5454	KOG0804	Cytoplasmic Zn-finger protein BRAP2 (BRCA1 associated protein)	General function prediction only	POORLY CHARACTERIZED	cyto 20, cyto_nucl 13.166, cyto_mito 12.332, mito_nucl 3.832, nucl 3, mito 3	BRAP2,zf-UBP,zf-RING_2
proteinId300837	-0.162856	0.793337	-4.07213	3.7227e-16	-3.90927	7.50691e-15	27.7516	16.2199	0.946389	KOG2116	Protein involved in plasmid maintenance/nuclear protein involved in lipid metabolism	Lipid transport and metabolism	METABOLISM	nucl 13, mito 8, cyto 5	LNS2,Lipin_N
proteinId300859	-2.04492	3.04155e-09	-2.31644	1.06654e-11	-0.271528	0.485228	46.5743	99.5274	20.2769	KOG0881	Cyclophilin type peptidyl-prolyl cis-trans isomerase	Posttranslational modification, protein turnover, chaperones	CELLULAR PROCESSES AND SIGNALING	cysk 11, cyto 8, cyto_nucl 6.833, cyto_pero 5.833, nucl 4.5	Pro_isomerase
proteinId300867	-0.244423	0.667281	-0.35113	0.465846	-0.106708	0.838451	50.4983	30.7342	24.4155	KOG1548	Transcription elongation factor TAT-SF1	Transcription	INFORMATION STORAGE AND PROCESSING	nucl 15.5, cyto_nucl 13, cyto 9.5	RRM_1,RRM_6,RRM_5
proteinId300873	-0.392613	0.626601	0.971118	0.142251	1.36373	0.0389359	22.1194	14.9611	30.1436					cysk 13, cyto 8, pero 3, nucl 2	DUF3115
proteinId30089	0.773805	0.217193	-3.50972	4.55075e-10	-4.28353	2.80642e-14	27.4716	8.22186	0.712625	KOG3417	Ras1 guanine nucleotide exchange factor	Signal transduction mechanisms	CELLULAR PROCESSES AND SIGNALING	nucl 17.5, cyto_nucl 10, pero 4, mito 3	RasGEF,RasGEF_N,SH3_1,SH3_9,SH3_2
proteinId300903	-0.874032	0.0288464	-1.47839	7.96879e-05	-0.604355	0.128874	12.8288	12.0702	4.40548	KOG1253	tRNA methyltransferase	Translation, ribosomal structure and biogenesis	INFORMATION STORAGE AND PROCESSING	mito 13, cyto 9, cyto_nucl 7.5, nucl 4	TRM
proteinId300908	-0.371644	0.505259	-0.370204	0.456685	0.00143967	0.997691	17.7504	11.7895	9.23587	KOG0820	Ribosomal RNA adenine dimethylase	RNA processing and modification	INFORMATION STORAGE AND PROCESSING	mito 11, cyto 6.5, cyto_nucl 6.5, nucl 5.5, pero 4	RrnaAD,Methyltransf_26
proteinId300938	0.763151	0.124729	-1.78826	0.000118014	-2.55141	2.58637e-08	21.1882	6.29695	1.83997	KOG1173	Anaphase-promoting complex (APC), Cdc16 subunit	Posttranslational modification, protein turnover, chaperones	CELLULAR PROCESSES AND SIGNALING	cysk 10, cyto 8, cyto_nucl 6.5, pero 4, nucl 3	TPR_11,TPR_2,Apc3,TPR_1,TPR_16,TPR_12,TPR_19,TPR_8,TPR_14,TPR_7,TPR_10,TPR_17,TPR_4,TPR_9
proteinId300942	-0.904153	0.0541716	-2.72506	1.08325e-10	-1.82091	2.403e-05	141.719	138.827	21.0645	KOG1602	Cis-prenyltransferase	Lipid transport and metabolism	METABOLISM	cyto 12, cyto_nucl 9.833, cyto_pero 9.833, nucl 6.5, pero 6.5	Prenyltransf
proteinId300947	0.909109	0.276345	-4.2563	0.000102344	-5.16541	2.00697e-06	14.3596	3.82212	0.147722	KOG1716	Dual specificity phosphatase	Defense mechanisms	CELLULAR PROCESSES AND SIGNALING	nucl 16, cyto_nucl 15, cyto 8	DSPc
proteinId300966	2.18042	0.000383265	-1.93054	0.00275032	-4.11096	4.02813e-11	20.5488	2.23446	0.583411	KOG1720	Protein tyrosine phosphatase CDC14	Defense mechanisms	CELLULAR PROCESSES AND SIGNALING	cyto 11, cyto_nucl 9.5, nucl 6, cysk 6, mito 1, extr 1, pero 1, vacu 1	RNA_ligase,AAA_33
proteinId300967	-0.982862	0.0292603	-7.84838	8.74105e-32	-6.86552	2.45873e-24	96.8233	99.2826	0.385372					extr 9, cyto 7, plas 3, mito 2, E.R. 2, golg 2	Pyrid_oxidase_2
proteinId300969	-1.28739	1.72295e-05	-1.67481	4.72209e-09	-0.387426	0.213561	102.941	129.239	41.0214	KOG2203	GTP-binding protein	General function prediction only	POORLY CHARACTERIZED	cyto 11.5, cyto_nucl 8.5, mito 6, nucl 4.5, pero 2	RHD3,GBP,Dynamin_N,AAA_28,MMR_HSR1
proteinId301004	-1.24554	4.27281e-06	-3.92177	3.64641e-51	-2.67623	3.23856e-24	300.206	366.759	24.4735	KOG2865	NADH:ubiquinone oxidoreductase, NDUFA9/39kDa subunit	Energy production and conversion	METABOLISM	mito 23, nucl 2	Epimerase,NAD_binding_10,NmrA,3Beta_HSD,RmlD_sub_bind
proteinId301034	-0.171175	0.735519	-1.30628	0.000920236	-1.1351	0.00469195	69.8919	39.8454	16.3615	KOG2785	C2H2-type Zn-finger protein	General function prediction only	POORLY CHARACTERIZED	nucl 17, mito 7, cyto 3	zf-C2H2_2,zf-C2H2_jaz,zf-met
proteinId301045	0.879258	0.084123	-1.9144	0.00015655	-2.79366	1.65774e-08	13.7167	3.79174	1.003	KOG0245	Kinesin-like protein	Cytoskeleton	CELLULAR PROCESSES AND SIGNALING	nucl 19, cyto 5, mito 1, plas 1, vacu 1	Kinesin
proteinId301053	0.863922	0.0398852	1.80653	1.92774e-06	0.942603	0.0152834	10.048	2.79582	10.0468	KOG2128	Ras GTPase-activating protein family - IQGAP	Signal transduction mechanisms	CELLULAR PROCESSES AND SIGNALING	nucl 9, mito 9, mito_nucl 9	RasGAP_C,RasGAP,IQ,CH
proteinId301067	-0.402351	0.601787	-3.46721	7.77956e-08	-3.06486	2.64089e-06	33.924	23.0008	2.0377	KOG2922	Uncharacterized conserved protein	Function unknown	POORLY CHARACTERIZED	plas 26	Mg_trans_NIPA
proteinId301111	0.707713	0.225383	-0.240502	0.682196	-0.948215	0.0760663	7.17366	2.24397	1.93886					nucl 9.5, cyto_nucl 9.333, cyto 8, cyto_pero 7.833, pero 6.5	Mid1
proteinId301122	-1.65722	6.26356e-08	-0.473081	0.126822	1.18414	8.98179e-05	43.8004	71.1162	52.2146	KOG2835	Phosphoribosylamidoimidazole-succinocarboxamide synthase	Nucleotide transport and metabolism	METABOLISM	cyto 22, mito 5	AIRC,ATP-grasp,ATP-grasp_4,CPSase_L_D2
proteinId301130	-0.333242	0.339578	1.35204	3.63187e-06	1.68528	8.07941e-09	108.366	69.7287	182.533	KOG4155	FOG: WD40 repeat	General function prediction only	POORLY CHARACTERIZED	mito 14.5, extr 9, cyto_mito 8.5	WD40,Ribosomal_L32p,eIF2A
proteinId301134	-0.360053	0.405523	-1.57031	3.90335e-05	-1.21026	0.00176179	17.3145	11.3744	3.87729	KOG3092	Casein kinase II, beta subunit	Signal transduction mechanisms	CELLULAR PROCESSES AND SIGNALING	nucl 14, cyto_nucl 14, cyto 10	CK_II_beta
proteinId301136	-0.407476	0.199298	-1.26073	6.16307e-06	-0.853254	0.00281882	55.4383	37.6522	15.9774	KOG2273	Membrane coat complex Retromer, subunit VPS5/SNX1, Sorting nexins, and related PX domain-containing proteins	Intracellular trafficking, secretion, and vesicular transport	CELLULAR PROCESSES AND SIGNALING	nucl 12.5, cyto_nucl 12, cyto 8.5, pero 3	Vps5,PX
proteinId30116	1.17464	0.024193	0.809707	0.102773	-0.364935	0.487957	10.9629	2.43249	4.37588	KOG0161	Myosin class II heavy chain	Cytoskeleton	CELLULAR PROCESSES AND SIGNALING	nucl 17, mito_nucl 11.333, cyto_nucl 10.833, mito 4.5, cyto 3.5	ATG11
proteinId301193	-1.63456	5.75538e-07	-3.90393	7.14009e-36	-2.26938	8.60997e-13	565.889	911.965	61.4519	KOG3075	Ribose 5-phosphate isomerase	Carbohydrate transport and metabolism	METABOLISM	cyto 15, cyto_nucl 9.5, mito 9	Rib_5-P_isom_A
proteinId301194	-2.2516	1.29798e-11	-1.60921	8.43957e-07	0.6424	0.0640951	138.574	342.673	113.901	KOG3445	Mitochondrial/chloroplast ribosomal protein 36a	Translation, ribosomal structure and biogenesis	INFORMATION STORAGE AND PROCESSING	mito 19, cyto 3, nucl 2, pero 2	L51_S25_CI-B8
proteinId301208	-0.68549	0.208241	-2.6572	5.91307e-08	-1.97171	7.75352e-05	16.0899	13.3154	2.08882					cyto 12, cyto_nucl 8.833, cyto_pero 7.833, mito 5, nucl 4.5, pero 2.5	Gly_transf_sug
proteinId301216	0.520877	0.574337	-0.771615	0.336143	-1.29249	0.102325	10.9669	3.84404	2.23662	KOG0269	WD40 repeat-containing protein	Function unknown	POORLY CHARACTERIZED	mito 10, cyto_nucl 7, pero 6, nucl 5.5, cyto 5.5	WD40,eIF2A
proteinId301219	0.166065	0.776112	-1.54405	0.000959514	-1.71011	0.000248656	21.2494	9.70735	3.33706	KOG0600	Cdc2-related protein kinase	Cell cycle control, cell division, chromosome partitioning	METABOLISM	nucl 12, cyto 11, pero 3	Pkinase,Pkinase_Tyr
proteinId301247	-0.246804	0.567968	1.57328	4.92338e-06	1.82009	1.38078e-07	295.631	181.561	554.16	KOG3432	Vacuolar H+-ATPase V1 sector, subunit F	Energy production and conversion	METABOLISM	cyto 18.5, cyto_nucl 13.5, nucl 3.5, mito 2, pero 2	ATP-synt_F
proteinId301292	-0.311665	0.354841	-2.17061	7.47765e-14	-1.85895	2.0624e-10	39.5687	25.1161	5.66383	KOG1279	Chromatin remodeling factor subunit and related transcription factors	Chromatin structure and dynamics	INFORMATION STORAGE AND PROCESSING	nucl 16, cyto_nucl 14, cyto 10	SWIRM,Myb_DNA-binding,Myb_DNA-bind_6
proteinId301324	0.0576588	0.943095	-3.09637	1.21817e-06	-3.15403	8.30281e-07	13.1818	6.48648	0.727463	KOG2747	Histone acetyltransferase (MYST family)	Chromatin structure and dynamics	INFORMATION STORAGE AND PROCESSING	nucl 15.5, cyto_nucl 11, cyto 5.5, pero 4	MOZ_SAS
proteinId301364	-0.615989	0.0523589	-2.11223	8.81279e-13	-1.49624	6.02195e-07	14.8714	11.7142	2.7486	KOG0128	RNA-binding protein SART3 (RRM superfamily)	RNA processing and modification	INFORMATION STORAGE AND PROCESSING	nucl 13.5, cyto_nucl 10.5, cyto 6.5, pero 6	RRM_1,RRM_6,RRM_5,Nup35_RRM_2
proteinId301370	-0.368501	0.190565	0.21752	0.409235	0.586022	0.0210821	605.064	399.372	474.595	KOG0232	Vacuolar H+-ATPase V0 sector, subunits c/c'	Energy production and conversion	METABOLISM	plas 13, mito 5, vacu 4, E.R. 3	ATP-synt_C
proteinId301411	-2.29479	4.49127e-16	-1.26688	6.07554e-06	1.02791	0.000331986	103.859	262.755	111.255	KOG0846	Mitochondrial/chloroplast ribosomal protein L15/L10	Translation, ribosomal structure and biogenesis	INFORMATION STORAGE AND PROCESSING	mito 23, extr 4	Ribosomal_L18e
proteinId301431	2.24519	1.57281e-10	3.25339	7.76304e-22	1.00821	0.00390233	156.046	16.5458	163.106	KOG4128	Bleomycin hydrolases and aminopeptidases of cysteine protease family	Amino acid transport and metabolism	METABOLISM	mito 12, cyto 6, cyto_pero 5.833, cyto_nucl 5.333, pero 4.5, nucl 3.5	Peptidase_C1_2,Peptidase_C1
proteinId301444	5.50467	7.77862e-07	10.9576	2.47276e-25	5.45297	1.3001e-38	7.79165	0.0435723	182.441	KOG0744	AAA+-type ATPase	Posttranslational modification, protein turnover, chaperones	CELLULAR PROCESSES AND SIGNALING	mito 23, nucl 2, cyto 2, cyto_nucl 2	AAA,AAA_17,AAA_22,AAA_16,AAA_33,AAA_18,Arch_ATPase
proteinId301458	-0.716977	0.13325	-2.629	3.87657e-09	-1.91203	2.54979e-05	7.91284	6.62647	1.07587	KOG0967	ATP-dependent DNA ligase I	Replication, recombination and repair	INFORMATION STORAGE AND PROCESSING	nucl 20, cyto_nucl 13.333, mito_nucl 10.833, cyto 5.5	DNA_ligase_A_M,DNA_ligase_A_N,DNA_ligase_A_C
proteinId301565	-0.167765	0.852153	-4.10338	4.38448e-09	-3.93562	2.38698e-08	47.7523	27.2505	1.47903	KOG2867	Phosphotyrosyl phosphatase activator	Signal transduction mechanisms	CELLULAR PROCESSES AND SIGNALING	cyto 9, cyto_nucl 7.5, extr 6, nucl 4, mito 4, vacu 2	PTPA
proteinId301602	-2.14016	2.82292e-07	-2.82751	2.46134e-12	-0.687349	0.114323	34.1034	76.8627	10.8786	KOG0342	ATP-dependent RNA helicase pitchoune	RNA processing and modification	INFORMATION STORAGE AND PROCESSING	nucl 12, mito 10, cyto 5	DUF4217,DEAD,Helicase_C
proteinId301638	-1.66347	1.14995e-07	-2.42345	1.06763e-15	-0.759985	0.0170478	297.926	489.558	92.533	KOG3389	NADH:ubiquinone oxidoreductase, NDUFS4/18 kDa subunit	Energy production and conversion	METABOLISM	mito 18.5, cyto_mito 11, extr 3, cyto 2.5	ETC_C1_NDUFA4
proteinId301679	-1.21451	0.0141037	-3.3979	8.21391e-13	-2.18338	6.82489e-06	23.3849	27.8332	2.60285	KOG1149	Glutamyl-tRNA synthetase (mitochondrial)	Translation, ribosomal structure and biogenesis	INFORMATION STORAGE AND PROCESSING	mito 25	tRNA-synt_1c
proteinId301690	-3.41317	2.30205e-29	-2.94651	8.19496e-23	0.466659	0.152683	1028.11	5626.74	738.515	KOG3320	40S ribosomal protein S7	Translation, ribosomal structure and biogenesis	INFORMATION STORAGE AND PROCESSING	nucl 14, mito_nucl 11.499, cyto_nucl 10.833, mito 7.5, cyto 4.5	Ribosomal_S7e
proteinId301696	0.215782	0.624528	1.16759	0.000843429	0.951812	0.00724543	46.4137	20.3529	47.0494					cysk 14, cyto 6, pero 5	PHP
proteinId301716	-0.345232	0.322675	0.0344228	0.930211	0.379655	0.232777	61.1705	39.7135	41.6095	KOG0712	Molecular chaperone (DnaJ superfamily)	Posttranslational modification, protein turnover, chaperones	CELLULAR PROCESSES AND SIGNALING	cyto 9, mito 5, extr 5, cyto_nucl 5, plas 4	DnaJ
proteinId301722	-1.62997	0.000282639	-0.961172	0.0280146	0.668803	0.146426	11.2471	18.0042	9.42484					plas 19, vacu 4, mito 2, E.R. 2	Sulf_transp,DUF4341
proteinId301764	0.0736746	0.949974	-3.07985	0.00194851	-3.15353	0.0015864	5.11443	2.48092	0.270006					nucl 14, mito 8, cyto 3	SLD3
proteinId301774	-2.70794	8.73844e-25	-2.17459	6.66512e-17	0.533356	0.0549536	1482.03	4982.92	1123.45	KOG1768	40s ribosomal protein S26	Translation, ribosomal structure and biogenesis	INFORMATION STORAGE AND PROCESSING	mito 15, cyto 7, nucl 5	Ribosomal_S26e
proteinId301806	-0.307476	0.491698	0.559507	0.141281	0.866983	0.0213125	33.166	21.0798	31.9186	KOG3062	RNA polymerase II elongator associated protein	General function prediction only	POORLY CHARACTERIZED	nucl 10, cyto_nucl 10, mito 9, cyto 8	KTI12,AAA_33,AAA_18,AAA_17
proteinId301825	1.23275	0.00343021	-2.78564	8.06569e-12	-4.01839	3.54794e-23	325.866	71.0803	10.3862	KOG3361	Iron binding protein involved in Fe-S cluster formation	Energy production and conversion	METABOLISM	mito 22, cyto 5	NifU_N
proteinId301851	-0.0452333	0.929631	2.14894	2.72384e-09	2.19417	1.07894e-09	19.6147	10.2824	46.9705	KOG2595	Predicted GTPase activator protein	Signal transduction mechanisms	CELLULAR PROCESSES AND SIGNALING	nucl 13, cyto_nucl 12, cyto 9, mito 2, plas 2	RabGAP-TBC
proteinId301858	-0.447646	0.402744	-2.65149	1.68779e-09	-2.20384	7.8018e-07	3875.15	2754.34	438.319	KOG0865	Cyclophilin type peptidyl-prolyl cis-trans isomerase	Posttranslational modification, protein turnover, chaperones	CELLULAR PROCESSES AND SIGNALING	cyto 15.5, cyto_nucl 13, nucl 7.5, mito 4	Pro_isomerase
proteinId301904	1.14996	0.014088	-2.08454	1.62168e-05	-3.2345	7.21352e-12	35.3915	8.08716	1.91018	KOG2976	Protein involved in autophagy and nutrient starvation	Posttranslational modification, protein turnover, chaperones	CELLULAR PROCESSES AND SIGNALING	mito 9, nucl 8.5, cyto_nucl 8.333, cyto 7, cyto_pero 5.333	APG5
proteinId301958	-0.425184	0.36857	-0.2757	0.527718	0.149484	0.744357	37.8343	26.1418	21.9436	KOG0226	RNA-binding proteins	General function prediction only	POORLY CHARACTERIZED	nucl 10.5, cyto_nucl 10, cyto 8.5, mito 6	RRM_1,RRM_6
proteinId301975	0.24526	0.52993	-1.12037	0.000541526	-1.36563	2.35762e-05	107.507	46.5498	21.77	KOG1659	Class 2 transcription repressor NC2, alpha subunit (DRAP1)	Transcription	INFORMATION STORAGE AND PROCESSING	nucl 23.5, cyto_nucl 14	CBFD_NFYB_HMF,Histone
proteinId301981	0.883436	0.0383947	-1.26177	0.00150509	-2.1452	4.55991e-08	79.4558	21.812	9.25145	KOG1113	cAMP-dependent protein kinase types I and II, regulatory subunit	Signal transduction mechanisms	CELLULAR PROCESSES AND SIGNALING	cysk 10, nucl 8.5, cyto_nucl 8.5, cyto 5.5	cNMP_binding,RIIa
proteinId302034	-0.489625	0.281067	0.0285844	0.962109	0.518209	0.213708	21.8285	15.6899	16.2961	KOG3190	Uncharacterized conserved protein	Function unknown	POORLY CHARACTERIZED	nucl 22, cyto 4	DUF947
proteinId302063	-0.34338	0.409213	-5.71043	7.16568e-51	-5.36705	1.03282e-44	171.931	111.162	2.08912	KOG1411	Aspartate aminotransferase/Glutamic oxaloacetic transaminase AAT1/GOT2	Amino acid transport and metabolism	METABOLISM	pero 8, cyto 5.5, cyto_nucl 5.5, cysk 5, nucl 4.5, mito 4	Aminotran_1_2
proteinId302065	-1.34831	0.00768673	-3.6668	4.68503e-14	-2.31849	3.07999e-06	20.8183	27.0301	2.10714	KOG0456	Aspartate kinase	Amino acid transport and metabolism	METABOLISM	mito 16, cyto 9	AA_kinase,ACT_7,ACT
proteinId302096	-0.185729	0.704927	0.805063	0.0368782	0.990792	0.0101074	67.9411	39.9195	71.33	KOG4086	Transcriptional regulator SOH1	Replication, recombination and repair	INFORMATION STORAGE AND PROCESSING	nucl 16, cyto_nucl 11.5, cyto 5, mito 4	Med31
proteinId302109	-0.185682	0.658449	-1.51712	7.60374e-06	-1.33144	9.79963e-05	25.7027	14.9711	5.29458	KOG0039	Ferric reductase, NADH/NADPH oxidase and related proteins	Secondary metabolites biosynthesis, transport and catabolism	METABOLISM	plas 25	NAD_binding_6,FAD_binding_8,Ferric_reduct
proteinId30212	3.25467	1.05787e-06	2.67578	4.41155e-05	-0.578896	0.345635	13.835	0.712685	4.83004					mito 14.5, cyto_mito 12.333, cyto 9, cyto_nucl 5.333	Abhydrolase_5,Abhydrolase_6
proteinId302126	-1.38546	0.0192769	-0.418902	0.476801	0.966559	0.0922153	35.9857	49.337	37.8164	KOG0867	Glutathione S-transferase	Posttranslational modification, protein turnover, chaperones	CELLULAR PROCESSES AND SIGNALING	cysk 18, pero 4, nucl 2, cyto 2, cyto_nucl 2	GST_C_2,GST_N_3,GST_N_2,GST_C
proteinId302131	0.00709219	0.987854	-1.27127	4.89419e-05	-1.27836	4.85965e-05	15.2589	7.76168	3.26677	KOG0929	Guanine nucleotide exchange factor	Intracellular trafficking, secretion, and vesicular transport	CELLULAR PROCESSES AND SIGNALING	cyto 10, cyto_nucl 9, nucl 6, mito 5, plas 3	Sec7,Sec7_N,DUF1981
proteinId302151	-0.621068	0.133748	-1.02632	0.00568714	-0.405251	0.311866	36.6041	28.6376	14.2676	KOG0925	mRNA splicing factor ATP-dependent RNA helicase	RNA processing and modification	INFORMATION STORAGE AND PROCESSING	nucl 21.5, cyto_nucl 13, cyto 3.5	OB_NTP_bind,HA2,Helicase_C
proteinId302171	-0.0681044	0.863459	0.356303	0.252995	0.424407	0.175975	30.161	16.1266	21.0885	KOG2431	1, 2-alpha-mannosidase	Carbohydrate transport and metabolism	METABOLISM	plas 11, nucl 6, cyto 6, cyto_nucl 6	Glyco_hydro_47
proteinId302255	2.044	5.20509e-06	4.15986	8.43098e-23	2.11586	3.48766e-07	20.9249	2.52759	47.351	KOG1282	Serine carboxypeptidases (lysosomal cathepsin A)	Amino acid transport and metabolism	METABOLISM	extr 17, E.R. 5, mito 1, cyto 1, pero 1, golg 1, vacu 1, cyto_mito 1, cyto_pero 1	Peptidase_S10
proteinId302256	-0.365869	0.486802	-4.93745	3.48062e-16	-4.57158	6.00477e-14	7.04949	4.68542	0.142547	KOG0601	Cyclin-dependent kinase WEE1	Cell cycle control, cell division, chromosome partitioning	METABOLISM	mito 10, cyto 8.5, cyto_nucl 8.5, nucl 7.5	Pkinase,Pkinase_Tyr
proteinId302280	-0.278634	0.577527	-0.773849	0.0653346	-0.495216	0.259496	32.4165	20.1106	11.903	KOG3036	Protein involved in cell differentiation/sexual development	General function prediction only	POORLY CHARACTERIZED	cyto 12, cyto_nucl 10.5, nucl 7, mito 4, pero 3	Rcd1
proteinId302283	6.48576	1.16786e-17	8.58111	3.65186e-31	2.09535	8.77174e-08	32.2244	0.151293	72.4312	KOG3886	GTP-binding protein	Signal transduction mechanisms	CELLULAR PROCESSES AND SIGNALING	cyto 10, nucl 8, mito 8, mito_nucl 8	Gtr1_RagA,Arf,Ras
proteinId302307	-0.829916	0.0220208	-7.27062	7.51809e-79	-6.4407	1.23326e-61	229.119	207.942	1.31099	KOG0688	Peptide chain release factor 1 (eRF1)	Translation, ribosomal structure and biogenesis	INFORMATION STORAGE AND PROCESSING	nucl 15.5, cyto_nucl 11.5, cyto 6.5, pero 4	eRF1_2,eRF1_3,eRF1_1
proteinId302310	-0.2245	0.537287	-0.245571	0.441977	-0.0210706	0.953832	54.0564	32.2502	27.7681	KOG1467	Translation initiation factor 2B, delta subunit (eIF-2Bdelta/GCD2)	Translation, ribosomal structure and biogenesis	INFORMATION STORAGE AND PROCESSING	cysk 11, cyto 10.5, cyto_nucl 8.5, nucl 5.5	IF-2B
proteinId302324	0.38271	0.582635	-5.85964	4.54847e-07	-6.24236	8.50992e-08	59.5743	23.4618	0.230654					nucl 15, cyto_nucl 13.5, cyto 8
proteinId302326	-1.24741	0.000901805	-2.95991	3.48031e-17	-1.71251	1.79173e-06	156.194	188.984	24.4527	KOG2550	IMP dehydrogenase/GMP reductase	Nucleotide transport and metabolism	METABOLISM	cyto 17, cyto_nucl 11, mito 5, nucl 3	IMPDH,CBS,FMN_dh
proteinId302331	2.59544	5.9379e-10	3.08163	3.53937e-14	0.486192	0.223615	18.7704	1.56152	13.7164					nucl 17, cyto_mito 4, mito 3.5, cyto 3.5
proteinId302340	0.474158	0.229204	-2.47025	6.19603e-12	-2.94441	1.89108e-16	79.7927	29.1682	5.31008	KOG0594	Protein kinase PCTAIRE and related kinases	General function prediction only	POORLY CHARACTERIZED	cyto 13.5, cyto_pero 10, pero 5.5, cysk 4, nucl 2	Pkinase,Pkinase_Tyr
proteinId302347	-0.387001	0.549908	-0.996699	0.0657268	-0.609698	0.285919	25.7955	17.0751	8.61265					plas 21, E.R. 4	PAP2_3
proteinId302355	-0.0445709	0.936252	-1.59063	0.000233467	-1.54606	0.000352663	54.1002	28.7646	9.62646					cysk 23, cyto 3
proteinId302431	-2.41145	1.28665e-09	-1.76272	5.96298e-06	0.648737	0.120742	37.3591	103.794	31.0682					plas 11, mito 8, extr 6	Tim17
proteinId302461	-0.388018	0.487427	-1.43966	0.00175122	-1.05164	0.0268436	396.536	262.553	98.1976					extr 14, plas 10, E.R. 2	His_Phos_2
proteinId302481	1.21058	0.00318185	0.927417	0.0197304	-0.283158	0.495421	19.2444	4.24458	8.28441	KOG1034	Transcriptional repressor EED/ESC/FIE, required for transcriptional silencing, WD repeat superfamily	Transcription	INFORMATION STORAGE AND PROCESSING	cyto_nucl 8.833, cyto 8, nucl 6.5, cysk 6, cyto_pero 5.999, mito 3	WD40
proteinId302500	-1.06286	0.000769141	-2.10613	1.00775e-12	-1.04326	0.000620473	209.608	224.517	52.788	KOG2446	Glucose-6-phosphate isomerase	Carbohydrate transport and metabolism	METABOLISM	cyto 14.5, cyto_nucl 12.5, nucl 7.5, pero 3	PGI
proteinId302501	0.414864	0.189444	-1.76743	1.60264e-10	-2.18229	2.80164e-15	718.668	275.242	82.2082	KOG1654	Microtubule-associated anchor protein involved in autophagy and membrane trafficking	Cytoskeleton	CELLULAR PROCESSES AND SIGNALING	cyto 14.5, cyto_nucl 12.5, nucl 9.5	Atg8,APG12
proteinId302520	0.855242	0.0844218	-0.792205	0.0973771	-1.64745	0.000329192	28.5613	8.08197	4.72026	KOG1721	FOG: Zn-finger	General function prediction only	POORLY CHARACTERIZED	nucl 22.5, cyto_nucl 12.5, mito 3	zf-H2C2_2,zf-C2H2
proteinId302543	-0.422866	0.383848	-0.0208044	0.977808	0.402062	0.365898	100.515	68.8575	68.9911	KOG1047	Bifunctional leukotriene A4 hydrolase/aminopeptidase LTA4H	Lipid transport and metabolism	METABOLISM	cyto 13, cyto_nucl 9.5, mito 6, nucl 4, extr 1, pero 1, E.R. 1, vacu 1	Peptidase_M1,Leuk-A4-hydro_C,Peptidase_MA_2
proteinId302562	0.0224719	0.960668	-1.99842	7.17538e-09	-2.02089	4.78125e-09	23.7584	11.9713	3.04092	KOG1124	FOG: TPR repeat	General function prediction only	POORLY CHARACTERIZED	nucl 20, cyto 4, mito 2	TRF,Myb_DNA-binding
proteinId302569	-0.211195	0.568321	-3.23108	6.3261e-27	-3.01989	1.77685e-23	703.072	418.596	44.919	KOG1769	Ubiquitin-like proteins	Posttranslational modification, protein turnover, chaperones	CELLULAR PROCESSES AND SIGNALING	nucl 13, cyto_nucl 12.833, cyto 10.5, cyto_pero 6.166	Rad60-SLD,ubiquitin
proteinId302575	-0.373615	0.618215	-2.52948	3.76665e-05	-2.15586	0.000539517	22.8585	15.3156	2.64278	KOG4546	Peroxisomal biogenesis protein (peroxin 16)	Intracellular trafficking, secretion, and vesicular transport	CELLULAR PROCESSES AND SIGNALING	mito 13, cyto 4.5, cyto_nucl 4, nucl 2.5, extr 2, pero 2	Pex16
proteinId302602	-0.223802	0.513373	0.436625	0.131432	0.660427	0.0220338	167.496	100.047	138.152	KOG2909	Vacuolar H+-ATPase V1 sector, subunit C	Energy production and conversion	METABOLISM	mito 15.5, cyto_mito 13, cyto 9.5	V-ATPase_C
proteinId302611	-2.1429	1.06183e-08	-4.00105	2.76213e-21	-1.85815	2.4147e-05	8.9879	20.4939	1.27021	KOG0752	Mitochondrial solute carrier protein	Energy production and conversion	METABOLISM	mito 16, plas 6, cyto 3	Mito_carr
proteinId302633	0.338618	0.394945	-2.20103	2.82613e-10	-2.53965	2.68039e-13	43.3769	17.6123	3.87472	KOG0909	Peptide:N-glycanase	Posttranslational modification, protein turnover, chaperones	CELLULAR PROCESSES AND SIGNALING	nucl 15, mito 7, cyto 4	Rad4,Transglut_core
proteinId302665	-1.9013	0.000286446	-1.75806	0.000599261	0.143235	0.816048	7.98572	15.5926	4.65363					mito 12, nucl 9, cyto 3.5, cyto_pero 3	NUDIX
proteinId302677	0.119837	0.933115	-2.36388	0.0315199	-2.48371	0.025479	4.9974	2.32274	0.404532	KOG0161	Myosin class II heavy chain	Cytoskeleton	CELLULAR PROCESSES AND SIGNALING	nucl 18, cyto_nucl 13, cyto 4, mito 3	Reo_sigmaC
proteinId302717	-1.41388	4.42407e-05	-2.92129	6.89426e-18	-1.50741	1.51645e-05	52.7122	72.1941	9.65131	KOG1270	Methyltransferases	Coenzyme transport and metabolism	METABOLISM	mito 22, nucl 3	Methyltransf_23,Methyltransf_11,Methyltransf_12,Methyltransf_31,Methyltransf_18,Methyltransf_9,Methyltransf_25,PrmA
proteinId302768	-1.12439	0.0070648	-0.528923	0.193017	0.595463	0.149506	100.192	112.156	78.9166	KOG1936	Histidyl-tRNA synthetase	Translation, ribosomal structure and biogenesis	INFORMATION STORAGE AND PROCESSING	cyto 15, cyto_mito 11.333, cyto_nucl 10.333, mito 6.5, nucl 4.5	tRNA-synt_His,tRNA-synt_2b,HGTP_anticodon
proteinId302818	-1.5027	0.00149245	-1.38866	0.00205964	0.114039	0.82938	13.0731	18.9039	7.28692	KOG1963	WD40 repeat protein	General function prediction only	POORLY CHARACTERIZED	nucl 9, cyto 8, mito 6, cyto_pero 6	WD40
proteinId302858	-1.8406	4.00207e-06	-3.57238	3.22988e-18	-1.73178	4.52898e-05	13.6609	25.3632	2.1285	KOG0254	Predicted transporter (major facilitator superfamily)	General function prediction only	POORLY CHARACTERIZED	plas 19, E.R. 5, vacu 2	MFS_1,Sugar_tr
proteinId302884	0.870765	NA	-3.19116	0.123044	-4.06193	0.0482083	3.30669	0.871303	0	KOG2294	Transcription factor of the Forkhead/HNF3 family	Transcription	INFORMATION STORAGE AND PROCESSING	mito 11, nucl 9.5, cyto_nucl 8.5, cyto 6.5	Fork_head
proteinId302894	-2.8363	1.46354e-22	-3.02365	7.65294e-26	-0.187347	0.57374	54.4272	200.763	25.0378					mito 26	Mit_ribos_Mrp51
proteinId303030	-2.30422	2.12109e-12	-3.23236	1.87001e-23	-0.928143	0.00653373	52.9307	134.202	14.4479	KOG3296	Translocase of outer mitochondrial membrane complex, subunit TOM40	Intracellular trafficking, secretion, and vesicular transport	CELLULAR PROCESSES AND SIGNALING	extr 15, mito 7, cyto 4	Porin_3
proteinId303049	0.379776	0.401226	-6.20219	8.84291e-17	-6.58197	1.30217e-18	81.2502	32.0527	0.364436	KOG4392	RNA polymerase, subunit L	Transcription	INFORMATION STORAGE AND PROCESSING	cyto 11, cyto_nucl 8.5, mito 7, nucl 4, extr 2	RNA_pol_L_2,RNA_pol_L
proteinId303050	-0.267015	0.490154	-3.51762	1.33433e-23	-3.2506	3.0125e-20	45.6522	28.0758	2.4636	KOG3786	RNA polymerase II assessory factor Cdc73p	Transcription	INFORMATION STORAGE AND PROCESSING	nucl 13.5, cyto_nucl 9.5, mito 5, cyto 4.5, extr 2	CDC73
proteinId303094	1.47863	0.00034611	-1.15574	0.00503758	-2.63437	4.21164e-11	69.3188	12.5133	5.70081					nucl 16.5, cyto_nucl 10.5, mito 6, cyto 3.5	Pil1
proteinId303103	-3.40161	7.9972e-39	-1.98157	2.10396e-14	1.42004	7.24939e-08	1053.06	5717.56	1471.94	KOG1732	60S ribosomal protein L21	Translation, ribosomal structure and biogenesis	INFORMATION STORAGE AND PROCESSING	mito 13, cyto 9, mito_nucl 9	Ribosomal_L21e
proteinId303131	-1.21562	0.00210336	-3.12608	4.4497e-17	-1.91046	4.82745e-07	106.963	127.715	14.6451	KOG4131	Ngg1-interacting factor 3 protein NIF3L1	General function prediction only	POORLY CHARACTERIZED	mito 19, cyto 8	NIF3
proteinId303154	0.388057	0.412156	-0.862917	0.0376033	-1.25097	0.00219383	28.8922	11.281	6.28192					plas 22, mito 2, cyto 1, pero 1, vacu 1, mito_nucl 1, cyto_pero 1	RGS
proteinId303172	-2.83228	1.01474e-20	-1.30866	1.57546e-05	1.52362	5.73852e-07	1023.92	3754.87	1546.29	KOG0815	60S acidic ribosomal protein P0	Translation, ribosomal structure and biogenesis	INFORMATION STORAGE AND PROCESSING	cyto 23, cyto_nucl 13.5	Ribosomal_L10,Ribosomal_60s
proteinId303198	4.58455	0.00507213	-0.0327601	0.998233	-4.61731	0.00307147	3.55958	0.0504623	0.0499304					nucl 10.5, cyto_nucl 9.333, cyto_mito 7.333, cyto 7, mito 6.5	HET
proteinId303214	-0.118552	0.863459	0.284765	0.615015	0.403317	0.478919	27.4929	15.2019	18.8802	KOG2594	Uncharacterized conserved protein	Function unknown	POORLY CHARACTERIZED	mito 14, plas 8, E.R. 2, nucl 1, pero 1, golg 1	DUF2392
proteinId303236	-1.10759	0.000529113	-2.40642	3.06184e-15	-1.29882	3.33725e-05	81.8489	90.4425	17.3109					cysk 17, cyto 9	Chalcone
proteinId303252	-0.0816603	0.848526	1.33136	2.84059e-05	1.41302	9.48342e-06	87.3867	47.3205	121.846	KOG2927	Membrane component of ER protein translocation complex	Intracellular trafficking, secretion, and vesicular transport	CELLULAR PROCESSES AND SIGNALING	plas 16, E.R. 8, mito 1, pero 1, vacu 1	Sec62
proteinId303310	-0.0271157	0.948158	-2.19739	8.70363e-13	-2.17027	1.93882e-12	61.3392	32.0643	7.07706	KOG2570	SWI/SNF transcription activation complex subunit	Chromatin structure and dynamics	INFORMATION STORAGE AND PROCESSING	nucl 14, mito 6, cyto 3, pero 3, cyto_pero 3	SWIB
proteinId303372	-0.620805	0.0990687	0.266175	0.462958	0.88698	0.0100367	35.6729	27.9549	34.4345	KOG1885	Lysyl-tRNA synthetase (class II)	Translation, ribosomal structure and biogenesis	INFORMATION STORAGE AND PROCESSING	cyto 11.5, cyto_nucl 8.5, mito 8, nucl 4.5	tRNA-synt_2,tRNA_anti-codon,tRNA-synt_2d
proteinId303408	2.72394	7.05101e-05	3.76022	6.76765e-09	1.03628	0.114494	22.9937	1.73386	25.6083	KOG0725	Reductases with broad range of substrate specificities	General function prediction only	POORLY CHARACTERIZED	mito 12, cyto 7.5, cyto_nucl 4.5, extr 4	adh_short,adh_short_C2,KR
proteinId303421	1.62916	3.38822e-05	4.03022	3.60235e-28	2.40107	6.32921e-12	9.22569	1.50392	25.6354	KOG4346	Uncharacterized conserved protein	Function unknown	POORLY CHARACTERIZED	cyto 10.5, cyto_nucl 8, mito 6, nucl 4.5, plas 2, pero 2	Telomere_reg-2
proteinId303441	1.33481	0.025816	0.508331	0.388727	-0.82648	0.155384	33.9173	6.942	10.1419					extr 18, E.R. 4, golg 3	DUF1793
proteinId303458	-0.944736	0.0281918	-1.65492	3.64208e-05	-0.710187	0.0938192	13.0029	12.7711	4.11613	KOG0733	Nuclear AAA ATPase (VCP subfamily)	Posttranslational modification, protein turnover, chaperones	CELLULAR PROCESSES AND SIGNALING	cyto 14, cyto_nucl 13.5, nucl 11	AAA,RuvB_N,AAA_5,AAA_17,AAA_16,AAA_14,AAA_33,AAA_2,AAA_22,Zeta_toxin,AAA_25,AAA_18,IstB_IS21,RNA_helicase,TIP49,AAA_19,AAA_28,Cytidylate_kin2,NACHT,Mg_chelatase,Arch_ATPase,AAA_3
proteinId303512	0.165843	0.700585	-0.594365	0.0912115	-0.760209	0.0298977	18.2535	8.32077	5.61109	KOG1938	Protein with predicted involvement in meiosis (GSG1)	Cell cycle control, cell division, chromosome partitioning	METABOLISM	nucl 12.5, mito 11, cyto_nucl 8.5	TRAPPC-Trs85
proteinId303516	-1.06083	0.00158612	-1.13793	0.000401905	-0.0771062	0.838681	18.0852	19.3735	8.97337	KOG0772	Uncharacterized conserved protein, contains WD40 repeat	Function unknown	POORLY CHARACTERIZED	cyto 14, nucl 9, cyto_pero 9	WD40
proteinId303546	-2.24319	2.65159e-06	-2.23775	1.34222e-06	0.0054328	0.992113	23.9538	59.8005	12.7827	KOG3017	Defense-related protein containing SCP domain	Function unknown	POORLY CHARACTERIZED	nucl 15.5, cyto_nucl 12.5, cyto 8.5	CAP
proteinId303552	-0.160351	0.871307	-0.381301	0.652686	-0.220949	0.800918	3.5769	2.04827	1.6021	KOG1605	TFIIF-interacting CTD phosphatase, including NLI-interacting factor (involved in RNA polymerase II regulation)	Transcription	INFORMATION STORAGE AND PROCESSING	nucl 14, cyto_nucl 14, cyto 10	NIF
proteinId303556	0.834441	0.0351391	3.46048	5.25679e-23	2.62603	2.814e-14	47.09	13.3628	152.324	KOG1018	Cytosine deaminase FCY1 and related enzymes	Nucleotide transport and metabolism	METABOLISM	cyto 24.5, cyto_nucl 14.5	dCMP_cyt_deam_1
proteinId30356	-0.840334	0.54097	4.22794	9.86238e-06	5.06828	9.23197e-08	0.28384	0.270061	5.8551					pero 9, cysk 7, cyto 6.5, cyto_nucl 6, nucl 4.5
proteinId303567	3.36255	0.0385734	-0.100927	0.965645	-3.46347	0.0239063	334.065	11.6085	11.0094	KOG0682	Ammonia permease	Inorganic ion transport and metabolism	METABOLISM	plas 22, E.R. 2, vacu 2	Ammonium_transp
proteinId303572	-2.01285	6.14211e-06	-4.86354	4.12987e-25	-2.85069	2.9887e-09	96.5572	204.421	6.90541					mito 16, cyto 4.5, cyto_nucl 4.5, nucl 3.5
proteinId303582	-1.08115	0.0127198	-0.850554	0.0387982	0.230591	0.614524	18.319	19.7664	11.1798	KOG2153	Protein involved in the nuclear export of pre-ribosomes	Intracellular trafficking, secretion, and vesicular transport	CELLULAR PROCESSES AND SIGNALING	nucl 19.5, cyto_nucl 13.5, cyto 6.5	NOC3p,CBF
proteinId303665	-1.69318	1.32712e-06	0.262627	0.473971	1.9558	7.50363e-09	108.04	181.486	222.413	KOG1698	Mitochondrial/chloroplast ribosomal protein L19	Translation, ribosomal structure and biogenesis	INFORMATION STORAGE AND PROCESSING	cyto_mito 10.166, mito 10, cyto 10, cyto_nucl 9.5	Ribosomal_L19
proteinId303686	0.0513642	0.904383	-0.664078	0.0403684	-0.715443	0.0294881	88.5879	43.6255	28.0818	KOG2440	Pyrophosphate-dependent phosphofructo-1-kinase	Carbohydrate transport and metabolism	METABOLISM	cyto 10.5, cyto_nucl 7, mito 6, plas 3, E.R. 3, nucl 2.5	PFK
proteinId303689	-1.58214	4.41445e-07	-2.79102	1.54172e-20	-1.20888	9.48977e-05	146.901	225.601	33.0883	KOG1885	Lysyl-tRNA synthetase (class II)	Translation, ribosomal structure and biogenesis	INFORMATION STORAGE AND PROCESSING	nucl 16.5, cyto_nucl 14, cyto 10.5	tRNA-synt_2,tRNA_anti-codon,tRNA-synt_2d
proteinId303746	0.5129	0.414802	-3.0167	6.46053e-08	-3.5296	2.38272e-10	19.3025	6.88357	0.845311	KOG0229	Phosphatidylinositol-4-phosphate 5-kinase	Signal transduction mechanisms	CELLULAR PROCESSES AND SIGNALING	nucl 17.5, cyto_nucl 11.5, cyto 4.5, mito 3	PIP5K
proteinId30376	0.504524	0.290638	0.993898	0.0164084	0.489374	0.262166	16.5556	6.00044	12.2868	KOG1995	Conserved Zn-finger protein	General function prediction only	POORLY CHARACTERIZED	plas 16, E.R. 7, extr 2	TRP,TRP_N
proteinId303783	0.174905	0.757309	0.609737	0.176404	0.434832	0.351471	16.8746	7.63318	11.9984	KOG2504	Monocarboxylate transporter	Carbohydrate transport and metabolism	METABOLISM	plas 25	MFS_1
proteinId303802	-3.08305	1.84262e-16	-5.07042	1.777e-40	-1.98737	4.13595e-07	50.0784	221.768	6.5549	KOG1518	Coproporphyrinogen III oxidase CPO/HEM13	Coenzyme transport and metabolism	METABOLISM	cyto 14.5, cyto_pero 9.5, nucl 7, pero 3.5	Coprogen_oxidas
proteinId303821	-0.682464	0.061615	-1.36435	3.6189e-05	-0.681885	0.048776	129.425	107.182	42.4008	KOG1209	1-Acyl dihydroxyacetone phosphate reductase and related dehydrogenases	Secondary metabolites biosynthesis, transport and catabolism	METABOLISM	mito 13, cyto 7, plas 5	adh_short,adh_short_C2
proteinId303836	-0.870496	0.0114846	-5.02422	2.15213e-49	-4.15373	7.97807e-34	95.3797	89.1975	2.72891	KOG0332	ATP-dependent RNA helicase	RNA processing and modification	INFORMATION STORAGE AND PROCESSING	cyto_nucl 13.5, cyto 13, nucl 12	DEAD,Helicase_C
proteinId303844	-0.645721	0.282813	-4.79356	7.25e-17	-4.14784	8.48524e-13	30.1166	24.5872	0.840654	KOG1309	Suppressor of G2 allele of skp1	Signal transduction mechanisms	CELLULAR PROCESSES AND SIGNALING	cyto_mito 9.666, cyto 9.5, cyto_nucl 9.333, mito 8.5, nucl 7	SGS,CS,TPR_11,TPR_2,TPR_1
proteinId303850	1.01667	0.0530116	2.20445	2.63587e-06	1.18777	0.00874419	5.94166	1.482	7.1136	KOG1216	von Willebrand factor and related coagulation proteins	Extracellular structures	CELLULAR PROCESSES AND SIGNALING	plas 17, E.R. 4, cyto 2, nucl 1, mito 1, extr 1, vacu 1, mito_nucl 1, cyto_pero 1	PalH
proteinId303872	-0.795878	0.0863918	0.437878	0.318863	1.23376	0.00345635	18.823	16.847	23.3802	KOG2382	Predicted alpha/beta hydrolase	General function prediction only	POORLY CHARACTERIZED	mito 16, cyto_nucl 5.5, cyto 5, nucl 4	Abhydrolase_6,Abhydrolase_1,Abhydrolase_5,PGAP1
proteinId3039	6.51242	3.19869e-31	8.39491	1.35136e-52	1.88249	6.78119e-05	70.4635	0.354107	135.635	KOG0061	Transporter, ABC superfamily (Breast cancer resistance protein)	Secondary metabolites biosynthesis, transport and catabolism	METABOLISM	plas 23, E.R. 3	ABC2_membrane,ABC_tran,AAA_21
proteinId303902	-0.768883	0.0360404	-1.47254	1.01643e-05	-0.703662	0.0444182	933.546	824.608	302.108					mito 23, cyto 3
proteinId303904	0.00176506	0.996889	-0.144977	0.661948	-0.146742	0.663119	61.1672	31.266	28.9232	KOG2905	Transcription initiation factor IIF, small subunit (RAP30)	Transcription	INFORMATION STORAGE AND PROCESSING	cyto 12, nucl 7, pero 5, mito 1, golg 1, vacu 1	TFIIF_beta
proteinId303919	0.484279	0.186095	0.540477	0.104909	0.0561981	0.881139	22.7184	8.2656	12.2979	KOG3896	Dynactin, subunit p62	Cell motility	CELLULAR PROCESSES AND SIGNALING	nucl 16, cyto 9	Dynactin_p62
proteinId303950	-2.21544	5.97474e-12	-0.787577	0.0145009	1.42786	8.76276e-06	77.8126	186.947	110.173					mito 15.5, mito_nucl 12.5, nucl 8.5	L51_S25_CI-B8
proteinId303952	-1.25112	0.00698637	-4.66456	6.58791e-24	-3.41344	3.36567e-13	21.9208	26.7367	1.04599	KOG1236	Predicted unusual protein kinase	General function prediction only	POORLY CHARACTERIZED	mito 13, plas 7, nucl 2, cyto 2, extr 2, cyto_nucl 2	ABC1
proteinId303962	-1.56829	1.32513e-05	-0.162268	0.674717	1.40602	5.9954e-05	15.1857	23.0651	20.9951	KOG2019	Metalloendoprotease HMP1 (insulinase superfamily)	General function prediction only	POORLY CHARACTERIZED	mito 24.5, cyto_mito 13	M16C_assoc,Peptidase_M16_C,Peptidase_M16
proteinId304011	-0.68898	0.0753112	-1.59025	7.04781e-06	-0.901274	0.0140097	153.897	128.414	43.2831	KOG4779	Predicted membrane protein	Function unknown	POORLY CHARACTERIZED	plas 20, mito 4, vacu 2, cyto_mito 2, mito_nucl 2	Yos1
proteinId30402	-2.48984	1.19307e-08	-5.46266	5.54416e-35	-2.97282	4.69671e-11	27.1741	80.4028	1.79532	KOG2533	Permease of the major facilitator superfamily	Carbohydrate transport and metabolism	METABOLISM	plas 27	MFS_1
proteinId304067	-0.317468	0.478133	0.215151	0.594029	0.532619	0.17263	18.6804	11.8644	14.0688	KOG0882	Cyclophilin-related peptidyl-prolyl cis-trans isomerase	Posttranslational modification, protein turnover, chaperones	CELLULAR PROCESSES AND SIGNALING	plas 12, nucl 5, cyto_nucl 5, cyto 3, E.R. 3, mito 1, pero 1, golg 1, vacu 1	Pro_isomerase,WD40
proteinId304081	-0.563944	0.0888296	-0.646434	0.0328068	-0.0824895	0.814028	890.44	680.659	442.895					nucl 11, cyto 8.5, cyto_mito 6.5, mito 3.5, pero 2
proteinId304123	-2.88224	3.76485e-36	-3.16595	2.72441e-44	-0.283705	0.260974	1234.58	4687.46	530.038	KOG3486	40S ribosomal protein S21	Translation, ribosomal structure and biogenesis	INFORMATION STORAGE AND PROCESSING	nucl 17.5, cyto_nucl 14.166, cyto 7.5, cyto_mito 5.332, cyto_pero 4.832	Ribosomal_S21e
proteinId304161	-0.609617	0.141553	-1.64881	1.11788e-05	-1.0392	0.00714416	22.4817	17.7059	5.70783	KOG2732	DNA polymerase delta, regulatory subunit 55	Replication, recombination and repair	INFORMATION STORAGE AND PROCESSING	cyto 11, cysk 10, mito 3, nucl 2	DNA_pol_E_B
proteinId304180	0.967703	0.340961	2.99719	0.000410757	2.02949	0.0133818	2.60795	0.654942	5.80707	KOG2419	Phosphatidylserine decarboxylase	Lipid transport and metabolism	METABOLISM	nucl 11, cyto_nucl 10.5, cyto 8, pero 5	PS_Dcarbxylase
proteinId304239	-0.392128	0.522468	-3.40667	3.93411e-10	-3.01455	4.02931e-08	43.3875	29.7011	2.76135					nucl 10.5, cyto_nucl 10.5, cyto 9.5, mito 4
proteinId304246	-0.147311	0.737806	0.377925	0.291931	0.525237	0.140424	15.1317	8.59035	11.4122	KOG2542	Uncharacterized conserved protein (YdiU family)	Function unknown	POORLY CHARACTERIZED	mito 16, nucl 5.5, cyto_nucl 5.5, cyto 4.5	UPF0061
proteinId304267	-0.298332	0.774571	-3.36082	6.54811e-05	-3.06249	0.000328271	7.76765	4.85115	0.446622	KOG0274	Cdc4 and related F-box and WD-40 proteins	General function prediction only	POORLY CHARACTERIZED	nucl 13.5, cyto_nucl 10.5, cyto 6.5, pero 4	WD40,Nup160,F-box-like,F-box
proteinId304290	-0.751143	0.0349705	-0.538025	0.110803	0.213118	0.560126	85.1174	73.2786	51.4009	KOG3218	RNA polymerase, 25-kDa subunit (common to polymerases I, II and III)	Transcription	INFORMATION STORAGE AND PROCESSING	nucl 14, cyto_nucl 12, cyto 8, mito 2, pero 2	RNA_pol_Rpb5_C,RNA_pol_Rpb5_N
proteinId304301	-1.48947	0.163751	-3.78785	0.000286479	-2.29839	0.0350689	4.18702	6.19658	0.380293	KOG2316	Predicted ATPase (PP-loop superfamily)	General function prediction only	POORLY CHARACTERIZED	mito 12.5, cyto_mito 11.333, cyto 9, cyto_nucl 7.333, nucl 4.5	ATP_bind_4
proteinId304363	0.38095	0.364055	-0.724683	0.0459155	-1.10563	0.00215206	69.3762	27.0754	16.6294	KOG1889	Putative phosphoinositide phosphatase	Lipid transport and metabolism	METABOLISM	plas 9, mito 7, cyto 6, nucl 2, pero 1, E.R. 1, golg 1	Syja_N
proteinId304372	0.696437	0.0967446	1.42633	0.000134953	0.729891	0.059662	60.2181	19.0956	52.8508	KOG3020	TatD-related DNase	Replication, recombination and repair	INFORMATION STORAGE AND PROCESSING	cyto 10, cyto_mito 8.833, cyto_nucl 8.333, mito 6.5, nucl 5.5, plas 1, pero 1, E.R. 1, golg 1, cysk 1	TatD_DNase
proteinId304390	-1.64927	3.25995e-10	-4.24716	1.96438e-59	-2.5979	1.0728e-22	184.622	297.41	15.8146	KOG1255	Succinyl-CoA synthetase, alpha subunit	Energy production and conversion	METABOLISM	mito 24, pero 2	CoA_binding,Ligase_CoA,Succ_CoA_lig,CoA_binding_2
proteinId304412	0.470685	0.277657	-1.12623	0.00299758	-1.59691	2.28203e-05	31.643	11.6251	5.38574	KOG2220	Predicted signal transduction protein	General function prediction only	POORLY CHARACTERIZED	nucl 13, cyto 7, mito 6	BRO1,ALIX_LYPXL_bnd
proteinId304431	-1.33891	0.000169471	-3.48569	1.97283e-22	-2.14678	4.04352e-09	100.702	131.995	11.8501	KOG3311	Ribosomal protein S18	Translation, ribosomal structure and biogenesis	INFORMATION STORAGE AND PROCESSING	nucl 14, cyto_nucl 11, cyto 6, mito 3, pero 3	Ribosomal_S13
[truncated: 7,628 more rows]
